# Supplementary material
Source: publisher figshare collection journal article supplement (https://acs.figshare.com/ndownloader/files/24149900)

Supporting Information

**Photocatalytic intramolecular C-H amination using *N*-oxyureas as nitrene precursors**

Ryan A. Ivanovich, Dilan E. Polat, André M. Beauchemin\*

*Centre for Catalysis Research and Innovation, Department of Chemistry and Biomolecular Sciences,  
University of Ottawa, Ottawa, Canada*

\*andre.beauchemin@uottawa.ca

|                                                                                              |    |
|----------------------------------------------------------------------------------------------|----|
| GENERAL INFORMATION                                                                          | 3  |
| MATERIALS                                                                                    | 4  |
| EXTENDED OPTIMIZATION EFFORTS                                                                | 4  |
| Table S1. Thermal cascade reaction of 4b                                                     | 4  |
| Scheme S1: Preliminary scope of thermal C-H amination (cascade reaction)                     | 5  |
| Table S2. Thermal C-H amination of 4b via microwave irradiation                              | 5  |
| Table S3. Thermal C-H amination of 5c                                                        | 6  |
| Table S4. Thermal C-H amination of 5c via microwave irradiation                              | 7  |
| Scheme S2: Preliminary scope of thermal C-H amination (sequential) via microwave irradiation | 7  |
| Table S5. Metal catalyzed C-H amination of 1A                                                | 8  |
| Scheme S3. Preliminary scope of metal catalyzed C-H amination / mechanism for dimerization   | 8  |
| Scheme S4. C-H amination using photocatalytic conditions (initial benzoate precursors)       | 9  |
| Figure S1. Optimization of the O-acyl substituent                                            | 9  |
| Table S6. Optimization of photocatalytic C-H amination using 1p                              | 10 |
| Table S7. Optimization of photocatalytic C-H amination using 1g                              | 10 |
| MECHANISTIC PROBES OF THE PHOTOCATALYTIC C-H AMINATION                                       | 11 |
| Figure S2. Mixture of urea (3a and 3b) obtained from photocatalytic reaction using 1ar       | 11 |
| Scheme S5. N-methylation probe casts doubt on above N-centered radical mechanism             | 13 |
| Figure S3. Radical trap experiments using BHT                                                | 15 |
| HPLC                                                                                         | 16 |
| Figure S4. HPLC spectrum of 1k                                                               | 16 |
| Figure S5. HPLC spectrum of enantioenriched 1an                                              | 16 |
| Figure S6. HPLC spectrum of 2k from photocatalytic C-H amination of 1k                       | 17 |
| Figure S7. HPLC spectrum of 2k from photocatalytic C-H amination of enantioenriched 1an      | 17 |
| CYCLIC VOLTAMMETRY                                                                           | 18 |
| Figure S9. Cyclic voltammetry of 1a                                                          | 18 |
| Figure S10. Cyclic voltammetry of 1h                                                         | 19 |
| Figure S11. Cyclic voltammetry of 1am                                                        | 20 |
| ALTERNATE MECHANISM CONSIDERED: SINGLE ELECTRON A-ELIMINATION                                | 21 |
| Scheme S6. Alternative mechanism invoking sequential PCET oxidation / reduction              | 21 |
| GENERAL PROCEDURES                                                                           | 22 |
| General Procedure A: Substitution of N-hydroxycarbamates                                     | 22 |
| General Procedure B: Synthesis of N-oxycarbamates <sup>13</sup>                              | 22 |
| General Procedure C: Substitution of N-acyloxycarbamates <sup>13</sup>                       | 22 |
| General Procedure D: Synthesis of N-oxyureas via carbamoyl chloride formation                | 23 |
| General Procedure E: Synthesis of hydroxamic acids                                           | 24 |
| General Procedure F: Synthesis of N-p-methoxybenzoylhydroxamic acid                          | 24 |
| General Procedure G: Photoinduced C-H amination of N-oxyureas.                               | 24 |
| CHARACTERIZATION DATA                                                                        | 25 |
| Synthesis of phenyl N-hydroxycarbamate                                                       | 25 |
| Synthesis of N-acyloxycarbamates                                                             | 25 |

|                                                                       |            |
|-----------------------------------------------------------------------|------------|
| <b>Synthesis of N-oxyureas</b>                                        | <b>26</b>  |
| <b>Synthesis of imidazolidin-2-one via photoinduced C-H amination</b> | <b>50</b>  |
| <b>Aziridination</b>                                                  | <b>62</b>  |
| <b>Site competition experiments</b>                                   | <b>65</b>  |
| <b>Synthesis of tetrabutylammonium dibutyl phosphate base</b>         | <b>70</b>  |
| <b>Synthesis of benzoyl N-oxyureas for initial reaction screening</b> | <b>70</b>  |
| <br>                                                                  |            |
| <b>COMPUTATIONAL DETAILS/DFT CALCULATIONS</b>                         | <b>74</b>  |
| <b>Vibrational frequency of 1p</b>                                    | <b>75</b>  |
| <b>Vibrational frequency of 1p radical</b>                            | <b>78</b>  |
| <b>Vibrational frequency of H-atom</b>                                | <b>81</b>  |
| <b>Vibrational frequency of 1h</b>                                    | <b>82</b>  |
| <b>Vibrational frequency of 1h radical</b>                            | <b>85</b>  |
| <b>Vibrational frequency of anionic 1p (triplet)</b>                  | <b>86</b>  |
| <b>Vibrational frequency of anionic 1p (singlet)</b>                  | <b>89</b>  |
| <b>Vibrational frequency of neutral 1p (triplet)</b>                  | <b>92</b>  |
| <b>Vibrational frequency of nitrene 1p (triplet)</b>                  | <b>95</b>  |
| <b>Vibrational frequency of nitrene 1p (singlet)</b>                  | <b>97</b>  |
| <br>                                                                  |            |
| <b>NMR SPECTRA</b>                                                    | <b>101</b> |

## **General Information**

Purification of reaction products was carried out by flash column chromatography using silica gel (40-63  $\mu\text{m}$ ), unless otherwise noted. Analytical thin layer chromatography (TLC) was performed on aluminum or glass, cut to size. Visualization was accomplished with UV light followed by staining with a potassium permanganate solution, and heating.  $^1\text{H}$  NMR and  $^{13}\text{C}$  NMR spectra were recorded on Bruker AVANCE 300 MHz and 400 MHz spectrometers at ambient temperature, unless otherwise indicated. Spectral data was reported in ppm using solvent as the reference ( $\text{CDCl}_3$  at 7.26 ppm or  $\text{DMSO-d}_6$  at 2.50 ppm or  $\text{CD}_3\text{CN}$  at 1.94 ppm for  $^1\text{H}$  NMR and  $\text{CDCl}_3$  at 77.0 ppm or  $\text{DMSO-d}_6$  at 39.43 for  $^{13}\text{C}$  NMR).  $^1\text{H}$  NMR data was reported as: multiplicity (app = apparent, br = broad, s = singlet, d = doublet, t = triplet, q = quartet, quint = quintet, sext = sextuplet, sept = septuplet, m = multiplet), integration and coupling constant(s) in Hz. Infrared (IR) spectra were obtained were recorded on a Attenuated Total Reflectance Fourier transform infrared spectrometer (ATR-FTIR). High-resolution mass spectroscopy (HRMS) was performed on a mass spectrometer with an electron beam of 70eV (EI) or Micromass Q-TOF I - Time of flight Electrospray Ionization mass spectrometer (ESI). Reactions were performed at 0.3 to 1.0 mmol reaction scale. Microwave reactions were conducted on a Biotage Initiator 8 series microwave reactor. Photoredox reactions were conducted using 12V flexible blue LED strip lights or a Kessil 40W Tuna blue LED lamp when specified.

## Materials

Unless otherwise noted, all commercially available materials were purchased from commercial sources and used without further purification.

## Extended optimization efforts

Table S1. Thermal cascade reaction of **4b**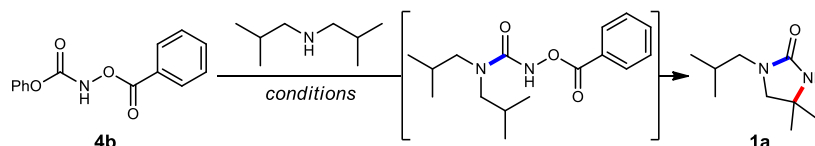

| Entry     | Base                           | Solvent                                    | Temp<br>°C | Time<br>h | % <b>1a</b> |
|-----------|--------------------------------|--------------------------------------------|------------|-----------|-------------|
| 1         | Et <sub>3</sub> N              | THF                                        | 70         | 15        | 0           |
| 2         | <i>i</i> -Pr <sub>2</sub> NEt  | THF                                        | 90         | 15        | 0           |
| 3         | <i>i</i> -Pr <sub>2</sub> NEt  | EtOH                                       | 90         | 15        | <10         |
| 4         | <i>i</i> -Pr <sub>2</sub> NEt  | MeCN                                       | 90         | 15        | 16          |
| 5         | Et <sub>3</sub> N              | MeCN                                       | 90         | 20        | 23          |
| 6         | K <sub>2</sub> CO <sub>3</sub> | MeCN                                       | 90         | 20        | 11          |
| 7         | <i>i</i> -Pr <sub>2</sub> NEt  | (CH <sub>2</sub> Cl) <sub>2</sub>          | 90         | 15        | 20          |
| 8         | Et <sub>3</sub> N              | (CH <sub>2</sub> Cl) <sub>2</sub>          | 90         | 15        | 35          |
| 9         | Et <sub>3</sub> N              | (CH <sub>2</sub> Cl) <sub>2</sub>          | 90         | 65        | 73          |
| 10        | DMAP                           | (CH <sub>2</sub> Cl) <sub>2</sub>          | 90         | 15        | 7           |
| 11        | DABCO                          | (CH <sub>2</sub> Cl) <sub>2</sub>          | 90         | 15        | 12          |
| <b>12</b> | <b>TMG</b>                     | (CH <sub>2</sub> Cl) <sub>2</sub>          | <b>90</b>  | <b>15</b> | <b>62</b>   |
| 13        | Imidazole                      | (CH <sub>2</sub> Cl) <sub>2</sub>          | 90         | 15        | 6           |
| 14        | DBU                            | (CH <sub>2</sub> Cl) <sub>2</sub>          | 90         | 15        | 6           |
| 15        | Pyridine                       | (CH <sub>2</sub> Cl) <sub>2</sub>          | 90         | 15        | 5           |
| 16        | Et <sub>3</sub> N              | PHCF <sub>3</sub>                          | 120        | 15        | 10          |
| 17        | Et <sub>3</sub> N              | (CH <sub>2</sub> Cl) <sub>2</sub>          | 120        | 15        | 45          |
| 18        | Et <sub>3</sub> N              | (CH <sub>2</sub> Cl) <sub>2</sub>          | 150        | 15        | 46          |
| 19        | Imidazole                      | (CH <sub>2</sub> Cl) <sub>2</sub>          | 120        | 15        | 70          |
| 20        | Imidazole                      | (CH <sub>2</sub> Cl) <sub>2</sub> [Ar]     | 120        | 15        | 65          |
| 21        | Imidazole                      | CDCl <sub>3</sub>                          | 120        | 15        | 72          |
| 22        | Imidazole                      | (CH <sub>2</sub> Cl) <sub>2</sub> - sieves | 120        | 15        | 62          |
| 23        | Imidazole                      | CHCl <sub>3</sub>                          | 120        | 15        | 8           |
| 24        | Imidazole                      | DMSO                                       | 120        | 15        | 53          |
| 25        | Imidazole                      | DMF                                        | 120        | 15        | 50          |

Conditions: phenyl *N*-benzoyloxycarbamate **4b** (1.00 equiv), diisobutylamine (1.00 equiv), base (0.20 equiv) in solvent (0.30 M) stir in oil bath. NMR yields are shown using 1,3,5-trimethoxybenzene as an internal standard.



**Scheme S1:** Preliminary scope of thermal C-H amination (cascade reaction)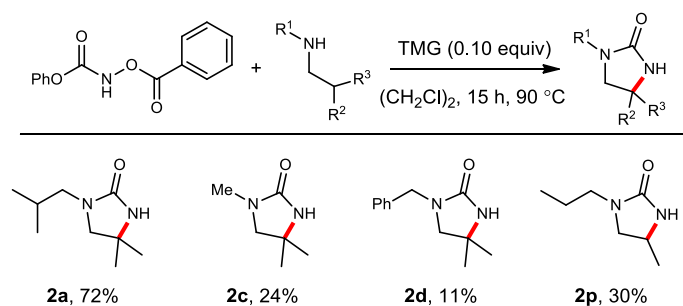**Table S2.** Thermal C-H amination of **4b** via microwave irradiation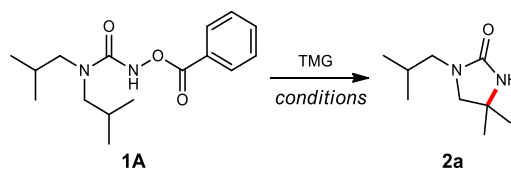

| Entry    | Solvent      | Temp<br>°C | Time<br>h | % <b>2a</b> |
|----------|--------------|------------|-----------|-------------|
| 1        | $(CH_2Cl)_2$ | 100        | 1         | 66          |
| <b>2</b> | $(CH_2Cl)_2$ | <b>100</b> | <b>2</b>  | <b>83</b>   |
| 3        | $(CH_2Cl)_2$ | 150        | 3         | 67          |
| 4        | $CHCl_3$     | 90         | 2         | 0           |

Conditions: 3-(benzoyloxy)-1,1-diisobutylurea **1A** (1.00 equiv), TMG (0.10 equiv) in solvent (0.30 M) stir under microwave irradiation. NMR yields are shown using 1,3,5-trimethoxybenzene as an internal standard.

**Table S3.** Thermal C-H amination of **5c**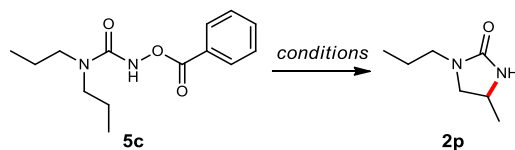

| Entry     | Additive     | Solvent                           | Temp<br>°C | Time<br>h | % <b>2p</b> |
|-----------|--------------|-----------------------------------|------------|-----------|-------------|
| 1         | TMG          | (CH <sub>2</sub> Cl) <sub>2</sub> | 90         | 15        | 20          |
| 2         | TMG          | CHCl <sub>3</sub>                 | 90         | 15        | 13          |
| 3         | TMG          | PhCF <sub>3</sub>                 | 90         | 15        | <10         |
| 4         | TMG          | DMSO                              | 90         | 15        | 0           |
| 5         | TMG          | EtOH - sieves                     | 90         | 15        | 25          |
| 6         | TMG          | MeCN                              | 90         | 15        | 18          |
| 7         | TMG          | Monoglyme                         | 90         | 15        | 0           |
| 8         | TMG          | Diglyme                           | 90         | 15        | 0           |
| 9         | TMG          | PhCF <sub>3</sub>                 | 150        | 15        | 26          |
| 10        | TMG          | DMSO                              | 150        | 15        | 0           |
| 11        | TMG          | DMF                               | 150        | 15        | 0           |
| <b>12</b> | <b>TMG</b>   | <b>Diglyme</b>                    | <b>150</b> | <b>15</b> | <b>69</b>   |
| 13        | TMG          | Dichlorobenzene                   | 150        | 15        | 0           |
| 14        | Benzoic acid | CHCl <sub>3</sub>                 | 90         | 15        | 0           |
| 15        | Phosphazene  | CHCl <sub>3</sub>                 | 90         | 15        | 27          |
| 16        | AIBN         | MeCN                              | 90         | 15        | 0           |
| 17        | -            | MeCN                              | 90         | 15        | 0           |
| 18        | -            | DMSO                              | 90         | 15        | 0           |
| 19        | -            | PhCF <sub>3</sub>                 | 90         | 15        | 0           |
| 20        | -            | EtOH - sieves                     | 90         | 15        | 30          |
| 21        | -            | EtOH                              | 90         | 15        | 30          |
| 22        | -            | MeOH                              | 90         | 15        | 0           |
| 23        | -            | <i>i</i> -PrOH                    | 90         | 15        | 15          |
| 24        | -            | <i>t</i> -BuOH                    | 90         | 15        | 0           |

Conditions: 3-(benzoyloxy)-1,1-dipropylurea **5c** (1.00 equiv), additive (0.10 equiv) in solvent (0.30 M) stir in oil bath. NMR yields are shown using 1,3,5-trimethoxybenzene as an internal standard.

**Table S4.** Thermal C-H amination of **5c** via microwave irradiation

| Entry    | Additive (equiv)                         | Solvent                           | Temp °C    | % <b>2p</b> |
|----------|------------------------------------------|-----------------------------------|------------|-------------|
| <b>1</b> | <b>TMG (0.10)</b>                        | (CH <sub>2</sub> Cl) <sub>2</sub> | <b>120</b> | <b>60</b>   |
| 2        | DBU (0.10)                               | (CH <sub>2</sub> Cl) <sub>2</sub> | 120        | 52          |
| <b>3</b> | <b>Et<sub>3</sub>N (0.10)</b>            | (CH <sub>2</sub> Cl) <sub>2</sub> | <b>120</b> | <b>60</b>   |
| 4        | <i>i</i> -Pr <sub>2</sub> NEt (0.10)     | (CH <sub>2</sub> Cl) <sub>2</sub> | 120        | 57          |
| 5        | TMG (0.10)                               | (CH <sub>2</sub> Cl) <sub>2</sub> | 90         | 14          |
| 6        | DMAP (0.10)                              | (CH <sub>2</sub> Cl) <sub>2</sub> | 120        | 14          |
| 7        | BF <sub>3</sub> ·OEt <sub>2</sub> (1.00) | MeCN                              | 100        | 0           |
| 8        | PhI(OAc) <sub>2</sub> (1.20)             | MeCN                              | 120        | 0           |
| 9        | HCl (g) (excess)                         | MeCN                              | 120        | 0           |

Conditions: 3-(benzoyloxy)-1,1-dipropylurea **5c** (1.00 equiv), additive in solvent (0.30 M) stir under microwave irradiation. NMR yields are shown using 1,3,5-trimethoxybenzene as an internal standard.

**Scheme S2:** Preliminary scope of thermal C-H amination (sequential) via microwave irradiation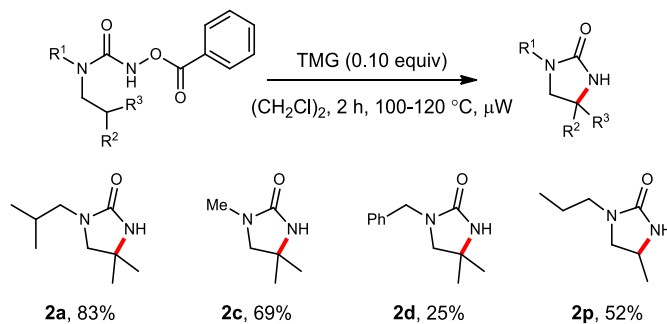

**Table S5.** Metal catalyzed C-H amination of **1A**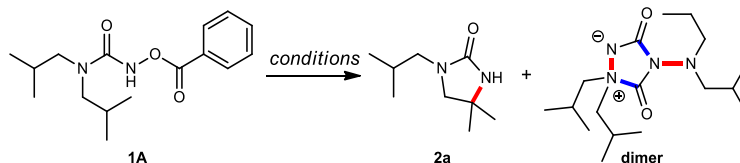

| Entry           | Metal (mol%)                                   | Base (equiv)                           | Solvent                             | Temp °C   | Time     | %1A      | %2a       | %dimer    |
|-----------------|------------------------------------------------|----------------------------------------|-------------------------------------|-----------|----------|----------|-----------|-----------|
| 1               | [IrCp*Cl <sub>2</sub> ] <sub>2</sub> (2.5)     | K <sub>2</sub> CO <sub>3</sub> (1.5)   | CH <sub>2</sub> Cl <sub>2</sub>     | rt        | 3        | 0        | 16        | 20        |
| 2               | <b>[IrCp*Cl<sub>2</sub>]<sub>2</sub> (2.5)</b> | <b>CsOAc (1.5)</b>                     | <b>CH<sub>2</sub>Cl<sub>2</sub></b> | <b>rt</b> | <b>3</b> | <b>0</b> | <b>20</b> | <b>33</b> |
| 3               | [IrCp*Cl <sub>2</sub> ] <sub>2</sub> (2.5)     | Imidazole (1.5)                        | CH <sub>2</sub> Cl <sub>2</sub>     | rt        | 16       | 100      | 0         | 0         |
| 4               | [IrCp*Cl <sub>2</sub> ] <sub>2</sub> (2.5)     | CsOAc (0.2)                            | CH <sub>2</sub> Cl <sub>2</sub>     | rt        | 3        | 0        | 17        | 20        |
| 5               | [IrCp*Cl <sub>2</sub> ] <sub>2</sub> (0.5)     | CsOAc (0.2)                            | CH <sub>2</sub> Cl <sub>2</sub>     | rt        | 3        | 0        | 21        | 15        |
| 6               | [IrCp*Cl <sub>2</sub> ] <sub>2</sub> (0.5)     | CsOAc (5.0)                            | CH <sub>2</sub> Cl <sub>2</sub>     | rt        | 3        | 0        | 18        | 14        |
| 7               | [IrCp*Cl <sub>2</sub> ] <sub>2</sub> (0.5)     | CsOAc (0.2)                            | THF                                 | rt        | 13       | 72       | 11        | 3         |
| 8               | [IrCp*Cl <sub>2</sub> ] <sub>2</sub> (0.5)     | CsOAc (0.2)                            | PhCF <sub>3</sub>                   | rt        | 13       | 0        | 27        | 18        |
| 9               | [IrCp*Cl <sub>2</sub> ] <sub>2</sub> (0.5)     | CsOAc (0.2)                            | MeCN                                | rt        | 13       | 37       | 11        | 6         |
| 10              | [IrCp*Cl <sub>2</sub> ] <sub>2</sub> (0.5)     | CsOAc (0.2)                            | DMSO                                | rt        | 13       | 60       | 0         | 0         |
| 11              | [IrCp*Cl <sub>2</sub> ] <sub>2</sub> (0.5)     | KOAc (0.2)                             | CH <sub>2</sub> Cl <sub>2</sub>     | rt        | 3        | 24       | 21        | 11        |
| 12              | [IrCp*Cl <sub>2</sub> ] <sub>2</sub> (0.5)     | NaOAc (0.2)                            | CH <sub>2</sub> Cl <sub>2</sub>     | rt        | 3        | 25       | 19        | 10        |
| 13              | [IrCp*Cl <sub>2</sub> ] <sub>2</sub> (0.5)     | MgO (0.2)                              | CH <sub>2</sub> Cl <sub>2</sub>     | rt        | 3        | 15       | 7         | 7         |
| 14              | [IrcodCl <sub>2</sub> ] <sub>2</sub> (2.5)     | CsOAc (1.5)                            | CH <sub>2</sub> Cl <sub>2</sub>     | rt        | 16       | 100      | 0         | 0         |
| 15              | [IrcodCl <sub>2</sub> ] <sub>2</sub> (2.5)     | CsOAc (1.5)                            | MeOH                                | rt        | 16       | 40       | 24        | 0         |
| 16              | [IrcodCl <sub>2</sub> ] <sub>2</sub> (2.5)     | CsOAc (0.2)                            | CH <sub>2</sub> Cl <sub>2</sub>     | rt        | 16       | 0        | 17        | 20        |
| 17              | [RhCp*Cl <sub>2</sub> ] <sub>2</sub> (2.5)     | K <sub>2</sub> CO <sub>3</sub> (1.5)   | MeOH                                | rt        | 16       | 0        | 5         | 0         |
| 18              | [RhCp*Cl <sub>2</sub> ] <sub>2</sub> (2.5)     | CsOAc (1.5)                            | MeOH                                | rt        | 16       | 0        | 0         | 0         |
| 19              | [RhCp*Cl <sub>2</sub> ] <sub>2</sub> (2.5)     | Cs <sub>2</sub> OAc <sub>3</sub> (1.5) | MeOH                                | rt        | 16       | 0        | 7         | 0         |
| 20              | [RhCp*Cl <sub>2</sub> ] <sub>2</sub> (2.5)     | <i>t</i> -BuOK (1.5)                   | MeOH                                | rt        | 16       | 0        | 13        | 0         |
| 21              | [RhCp*Cl <sub>2</sub> ] <sub>2</sub> (2.5)     | <i>t</i> -BuOK (1.5)                   | MeOH                                | rt        | 16       | 0        | 0         | 0         |
| 22              | [RhCp*Cl <sub>2</sub> ] <sub>2</sub> (2.5)     | <i>t</i> -BuOK (1.5)                   | <i>i</i> -PrOH                      | rt        | 16       | 0        | 0         | 0         |
| 23              | [RhOAc] <sub>2</sub> (5.0)                     | K <sub>2</sub> CO <sub>3</sub> (1.5)   | CH <sub>2</sub> Cl <sub>2</sub>     | rt        | 16       | 0        | 10        |           |
| 24 <sup>a</sup> | [RhOAc] <sub>2</sub> (5.0)                     | Imidazole (1.5)                        | (CH <sub>2</sub> Cl) <sub>2</sub>   | 90        | 16       |          | 37        |           |
| 25              | [Rhesp <sub>2</sub> ] <sub>2</sub> (5.0)       | K <sub>2</sub> CO <sub>3</sub> (1.5)   | (CH <sub>2</sub> Cl) <sub>2</sub>   | rt        | 16       | 100      | 0         | 0         |

Conditions: 3-(benzoyloxy)-1,1-diisobutylurea **1A** (1.00 equiv), metal, base in solvent (0.3M) stir at r.t.. <sup>a</sup>Cascade reaction with 80% of SM converted. NMR yield are shown using 1,3,5-trimethoxybenzene as an internal standard.

**Scheme S3.** Preliminary scope of metal catalyzed C-H amination / mechanism for dimerization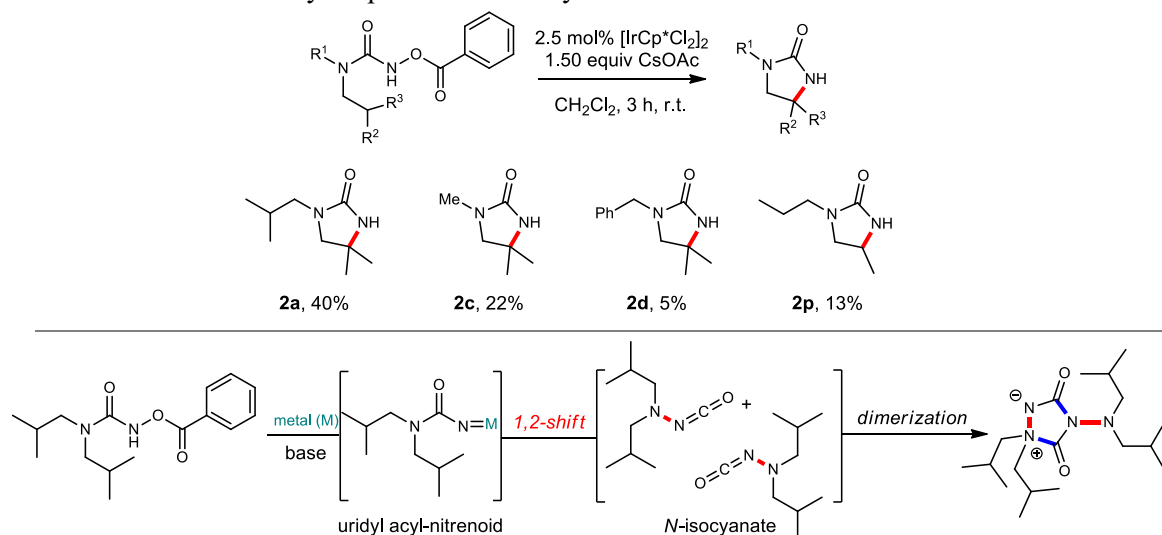

## Scheme S4. C-H amination using photocatalytic conditions (initial benzoate precursors)

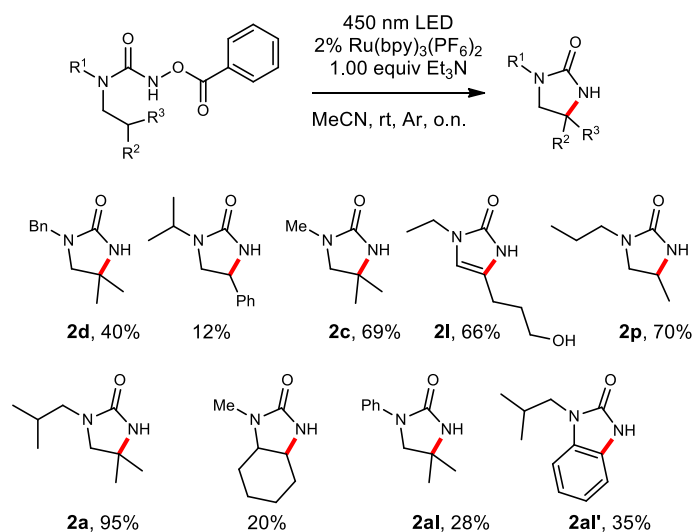Figure S1. Optimization of the *O*-acyl substituent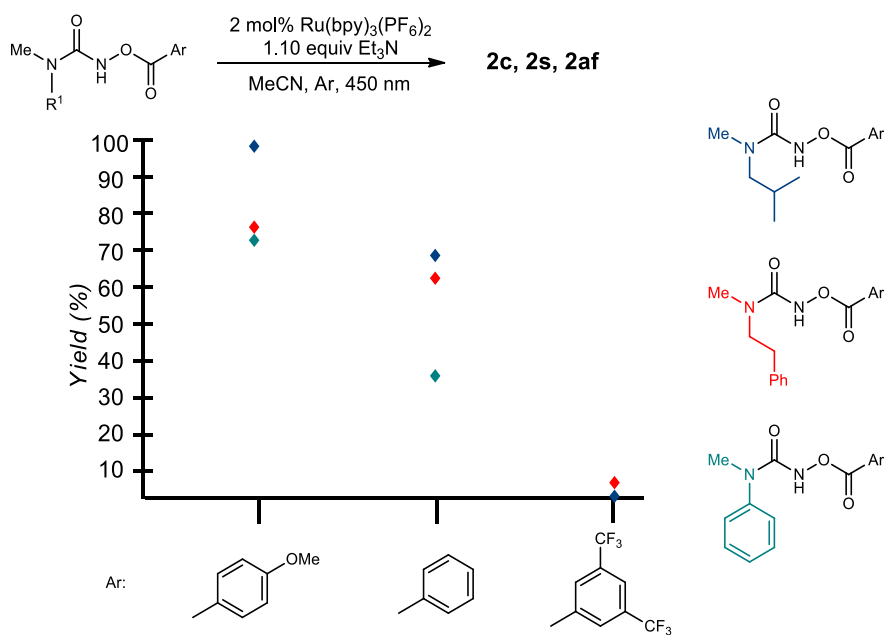

In contrast to recent work by Chang,<sup>1</sup> which clearly demonstrated the effectiveness of the 3,5-bis-trifluoromethyl group as an activating group for EnT induced triplet nitrene formation of amide and carbamate precursors, we found this substrate to be completely ineffective. It would decompose rapidly, even under our milder reaction conditions. In contrast, we found that more electron rich precursors were more effective (**Figure S2**). This finding was also inconsistent with *N*-centered radical approaches which rely on an initial SET reduction to generate the radical.<sup>2</sup>

<sup>1</sup> Jung, H.; Keum, H.; Kweon, J.; Chang, S. *J. Am. Chem. Soc.* **2020**. <https://doi.org/10.1021/jacs.0c00868>.

<sup>2</sup> Ren, X.; Guo, Q.; Chen, J.; Xie, H.; Xu, Q.; Lu, Z. *Chem. Eur. J.* **2016**, 22, 18695–18699.

**Table S6.** Optimization of photocatalytic C-H amination using **1p**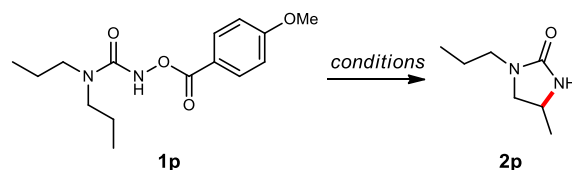

| Entry | Photocatalyst                                                        | Base                   | Solvent                           | % <b>2p</b> |
|-------|----------------------------------------------------------------------|------------------------|-----------------------------------|-------------|
| 1     | -                                                                    | Et <sub>3</sub> N      | MeCN                              | 0           |
| 2     | [Ru(bpy) <sub>3</sub> ](PF <sub>6</sub> ) <sub>2</sub>               | -                      | MeCN                              | 0           |
| 3     | <b>[Ru(bpy)<sub>3</sub>](PF<sub>6</sub>)<sub>2</sub></b>             | <b>Et<sub>3</sub>N</b> | <b>MeCN</b>                       | <b>92</b>   |
| 4     | [Ir(ppy) <sub>2</sub> (dtbpy)](PF <sub>6</sub> )                     | Et <sub>3</sub> N      | MeCN                              | 40          |
| 5     | [Ir(dF-CF <sub>3</sub> -ppy) <sub>2</sub> (dtbpy)](PF <sub>6</sub> ) | Et <sub>3</sub> N      | MeCN                              | 33          |
| 6     | [Ru(bpm) <sub>3</sub> ]Cl <sub>2</sub>                               | Et <sub>3</sub> N      | MeCN                              | 11          |
| 7     | TPP                                                                  | Et <sub>3</sub> N      | MeCN                              | 0           |
| 8     | Ir(dFppy) <sub>3</sub>                                               | Et <sub>3</sub> N      | MeCN                              | 0           |
| 9     | [Ru(bpy) <sub>3</sub> ](PF <sub>6</sub> ) <sub>2</sub>               | Ph <sub>3</sub> P      | MeCN                              | 17          |
| 10    | [Ru(bpy) <sub>3</sub> ](PF <sub>6</sub> ) <sub>2</sub>               | Et <sub>3</sub> N      | PhCF <sub>3</sub>                 | 0           |
| 11    | [Ru(bpy) <sub>3</sub> ](PF <sub>6</sub> ) <sub>2</sub>               | Et <sub>3</sub> N      | DMSO                              | 57          |
| 12    | [Ru(bpy) <sub>3</sub> ](PF <sub>6</sub> ) <sub>2</sub>               | Et <sub>3</sub> N      | Dioxane                           | 0           |
| 13    | [Ru(bpy) <sub>3</sub> ](PF <sub>6</sub> ) <sub>2</sub>               | Et <sub>3</sub> N      | THF                               | 9           |
| 14    | [Ru(bpy) <sub>3</sub> ](PF <sub>6</sub> ) <sub>2</sub>               | Et <sub>3</sub> N      | (CH <sub>2</sub> Cl) <sub>2</sub> | 78          |
| 15    | [Ru(bpy) <sub>3</sub> ](PF <sub>6</sub> ) <sub>2</sub>               | Et <sub>3</sub> N      | CH <sub>2</sub> Cl <sub>2</sub>   | 77          |

Conditions: 3-(benzoyloxy)-1,1-dipropylurea **1p** (1.00 equiv), photocatalyst (2 mol%), additive (1.10 equiv) in solvent (0.3M) irradiated under inert atmosphere with 450 nm blue LED. <sup>a</sup>BDFE calculated using a reported method.<sup>3</sup>

**Table S7.** Optimization of photocatalytic C-H amination using **1g**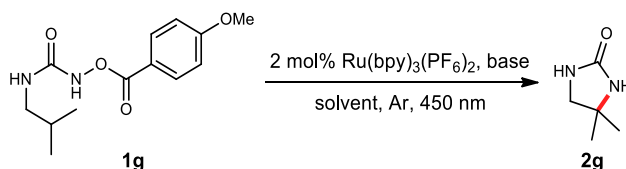

| Entry | Base (equiv)                   | Solvent                         | Temp °C | %Product |
|-------|--------------------------------|---------------------------------|---------|----------|
| 1     | Et <sub>3</sub> N (1.10 equiv) | MeCN                            | r.t.    | 0        |
| 2     | Phosphate (5 mol%)             | CH <sub>2</sub> Cl <sub>2</sub> | r.t.    | 18       |
| 3     | Phosphate (5 mol%)             | CH <sub>2</sub> Cl <sub>2</sub> | 40      | 45       |
| 4     | Phosphate (5 mol%)             | CH <sub>2</sub> Cl <sub>2</sub> | 60      | 50       |
| 5     | Phosphate (5 mol%)             | CH <sub>2</sub> Cl <sub>2</sub> | 80      | 17       |

Conditions: 1-isobutyl-3-((4-methoxybenzoyl)oxy)urea **1g** (1.00 equiv), photocatalyst (2 mol%), additive (1.10 equiv) in solvent (0.3M) irradiated under inert atmosphere with 450 nm blue LED.

<sup>3</sup> Choi, G. J.; Knowles, R. R. *J. Am. Chem. Soc.* **2015**, *137*, 9226–9229.

## Mechanistic probes of the photocatalytic C-H amination

Figure S2. Mixture of urea (**3a** and **3b**) obtained from photocatalytic reaction using **1ar**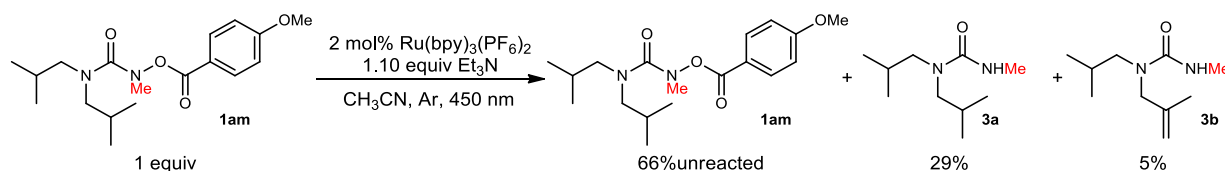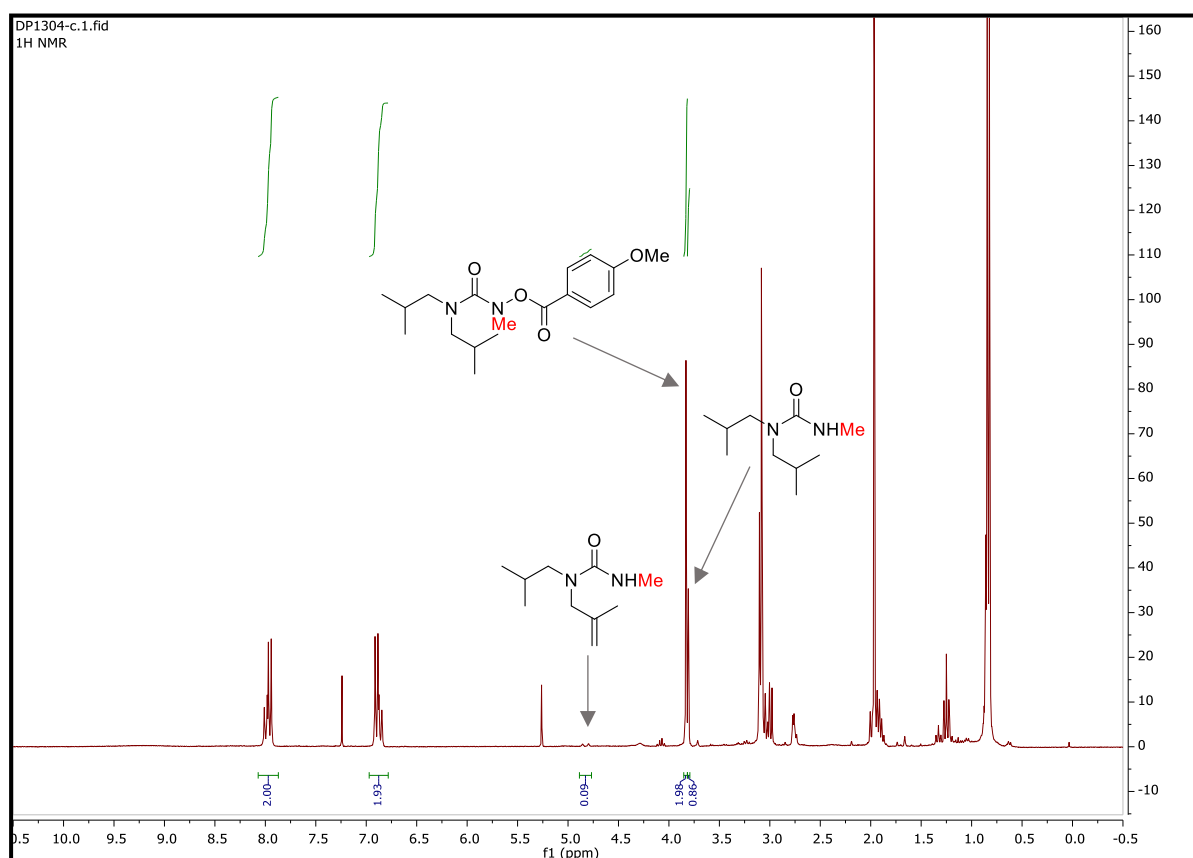

When the *N*-methylated derivative **1am** was subjected to the reaction, we noticed that there was no product formation in the crude NMR. Notably, the reaction was sluggish, even after 72 hours 66% of the starting material remained unreacted. This was accompanied by the observance and isolation of two ureas, **3a** and **3b**, which were obtainable from reduction of the precursor. This indicated to us that the *N*-H was crucial for effective C-H amination. This could be explained by invoking the EnT reaction recently introduced by Chang, which required deprotonation of the hydroxamate precursors for exothermic EnT. This is supported by our own DFT calculations (see below), which clearly demonstrate that EnT to the neutral species is exceptionally endergonic ( $E_{\text{T neutral}} = 74$  kcal/mol) whereas EnT to the deprotonated precursor is thermodynamically accessible ( $E_{\text{T anionic}} = 53$  kcal/mol). Moreover, the isolation of **3b** is crucial as it clearly showcases that an alternative mechanism involving 1,5-HAT and oxidation of the alkyl-radical followed by carbocation trapping ring-closure is likely not operating in this system (Scheme S5).

NMR of isolated mixture of ureas (**3a** and **3b**)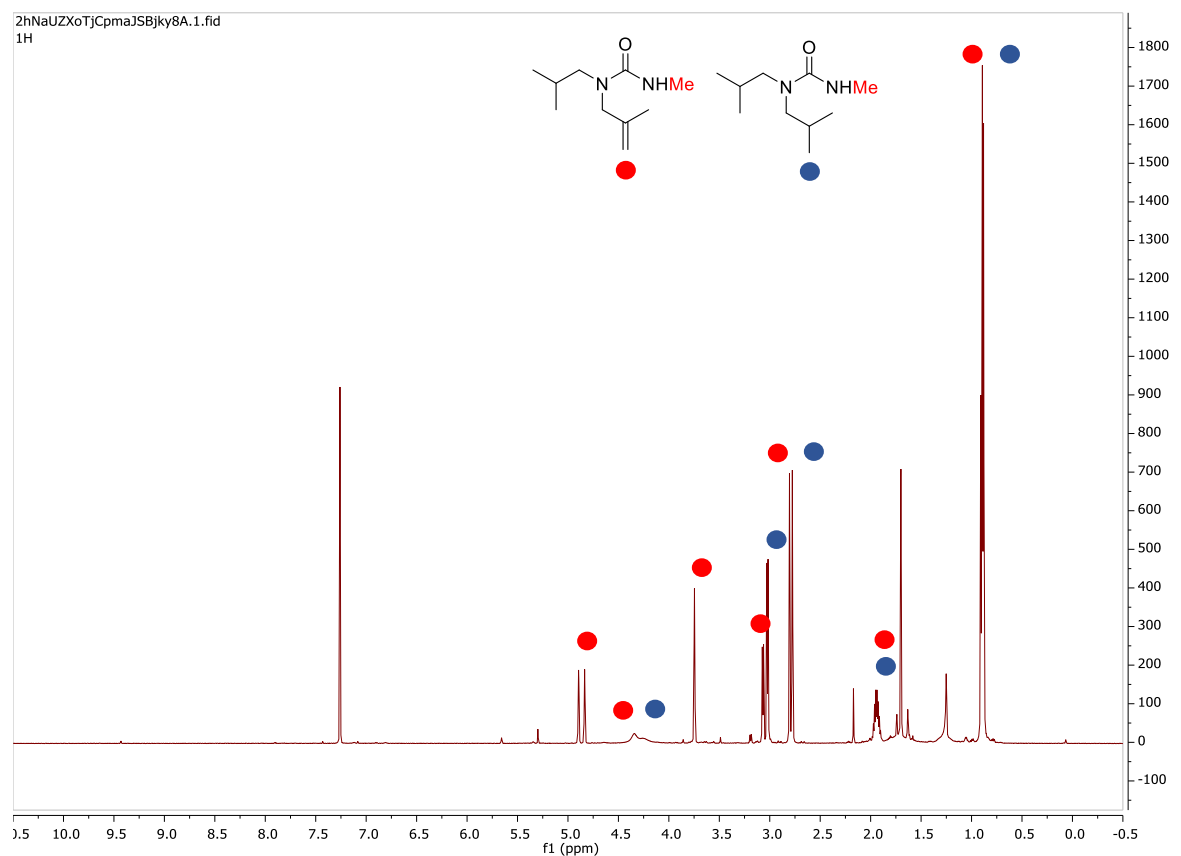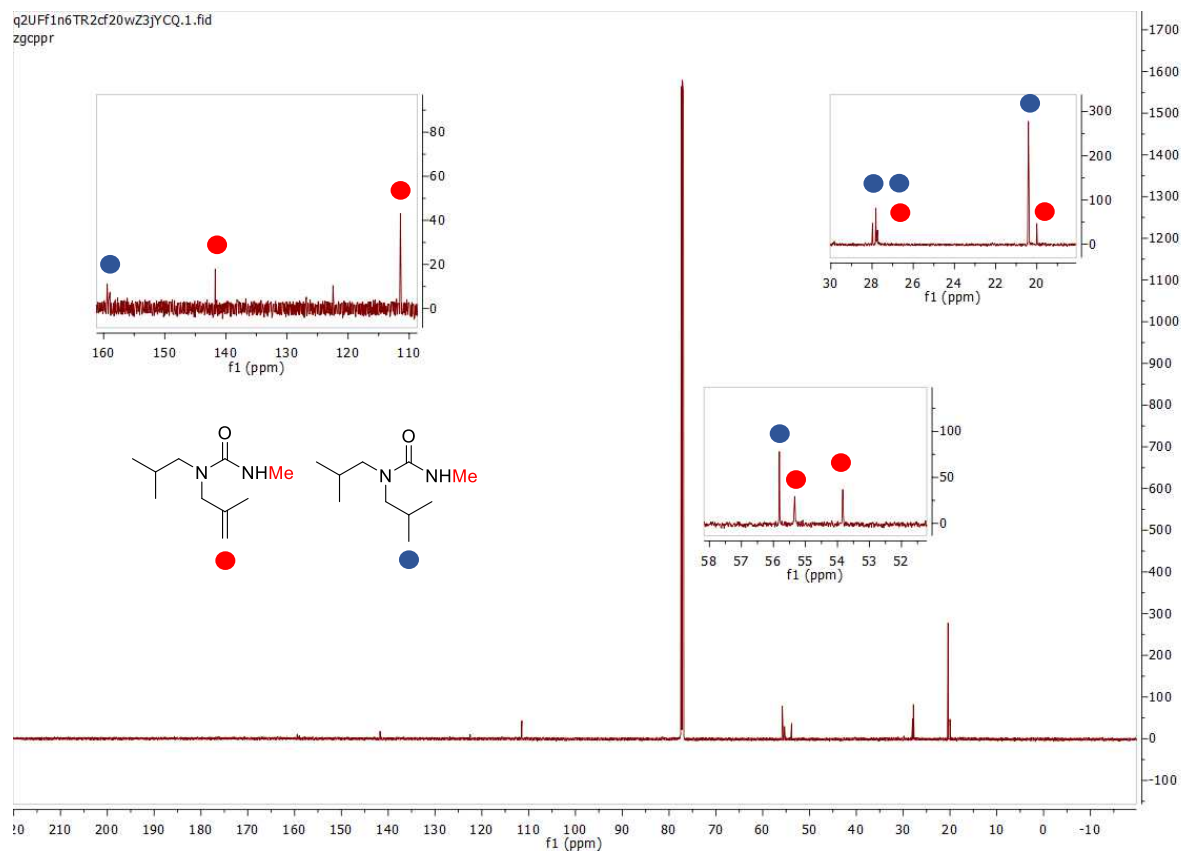



The two ureas were isolated as an inseparable mixture. A genuine sample of **3a** was synthesized to account for its peaks in the NMR mixture. *The peak at 122.5 ppm is an artifact from the NMR.*

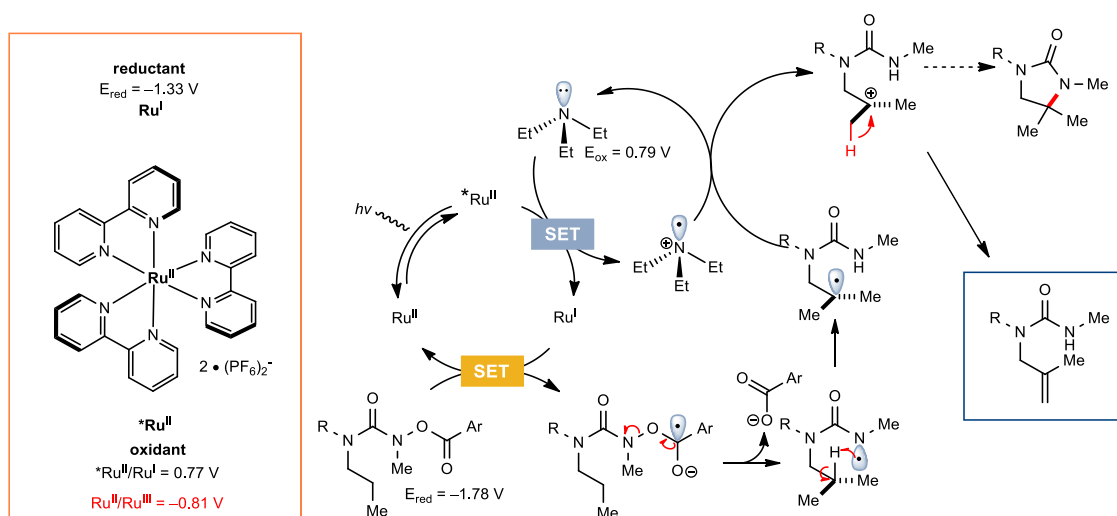

**Scheme S5.** *N*-methylation probe casts doubt on above *N*-centered radical mechanism

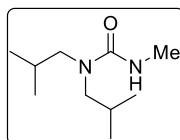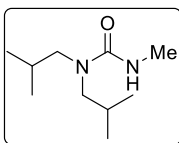

**1,1-diisobutyl-3-methylurea (3a):** The title compound was synthesized according general procedure **D** using diisobutylamine (0.87 mL, 5.0 mmol), toluene (0.8 M), KOH pellets (0.280 g, 5.00 mmol), and water (2.9 M) at 0 °C. A dripping funnel was affixed on top of the roundbottom flask and this apparatus was purged with argon for 10 minutes. Phosgene (15% in toluene) (8.2 mL, 11.5 mmol) was added to the dripping funnel under inert atmosphere, and was allowed to drip over 1 hour at 0 °C while stirring vigorously. The reaction was allowed to stir for an additional 30 minutes after complete addition of phosgene solution. Upon completion, the crude reaction mixture was bubbled with an argon balloon for 20 minutes in a well ventilated fumehood, to release any excess phosgene gas. The crude reaction mixture was then extracted to remove the aqueous layer, and then the organic phase was washed with brine (5.0 mL x1). The organic phase was collected and dried with Na<sub>2</sub>SO<sub>4</sub>. The solids were filtered over a cotton plug, and the filtrate was evaporated under reduced pressure to provide the crude *N*-diisobutylcarbamoyl chloride which was used in the next step without further purification. To the crude *N*-diisobutylcarbamoyl chloride was added CH<sub>2</sub>Cl<sub>2</sub> (0.3 M) and cooled to 0 °C. To this was added methylamine hydrochloride (0.338 g, 5.00 mmol), and followed immediately by Et<sub>3</sub>N (1.39 mL, 10.0 mmol). The reaction was allowed to warm to room temperature and stir overnight. Upon completion, the reaction was extracted with NaHCO<sub>3</sub> (5.0 mL x1), and then brine (5.0 mL x1). The organic phase was collected and dried with Na<sub>2</sub>SO<sub>4</sub>. The solids were filtered over a cotton plug, and the filtrate was evaporated under reduced pressure which was purified by flash column chromatography (30% EtOAc/Hexanes → 70% EtOAc/Hexanes) to yield a colourless oil (0.507 g, 54% over 2 steps).

**<sup>1</sup>H NMR (400 MHz, CDCl<sub>3</sub>):** δ 4.33-4.20 (br s, 1H), 3.2 (d, *J* = 7.5 Hz, 2H), 2.79 (d, *J* = 4.7 Hz, 4H), 2.08-1.78 (m, 2H), 0.88 (d, *J* = 6.6 Hz, 12H).

**<sup>13</sup>C NMR (100 MHz, CDCl<sub>3</sub>):** δ 159.0 (C), 55.7 (CH<sub>2</sub>), 27.7 (CH), 27.0 (CH), 20.4 (CH<sub>3</sub>).

The title compound has been previously reported.<sup>4</sup>

<sup>4</sup> Snyder, J. K.; Stock, L. M. *J. Org. Chem.* **1980**, *45*, 886-891.

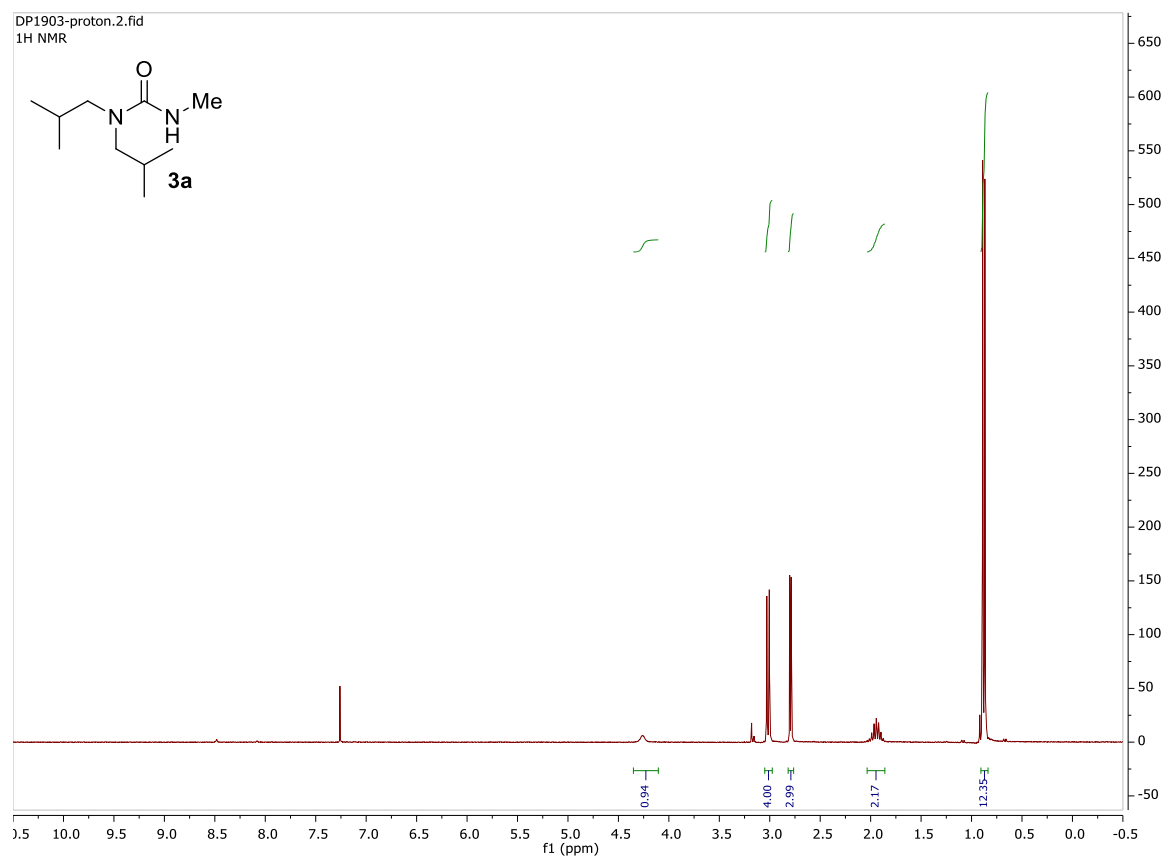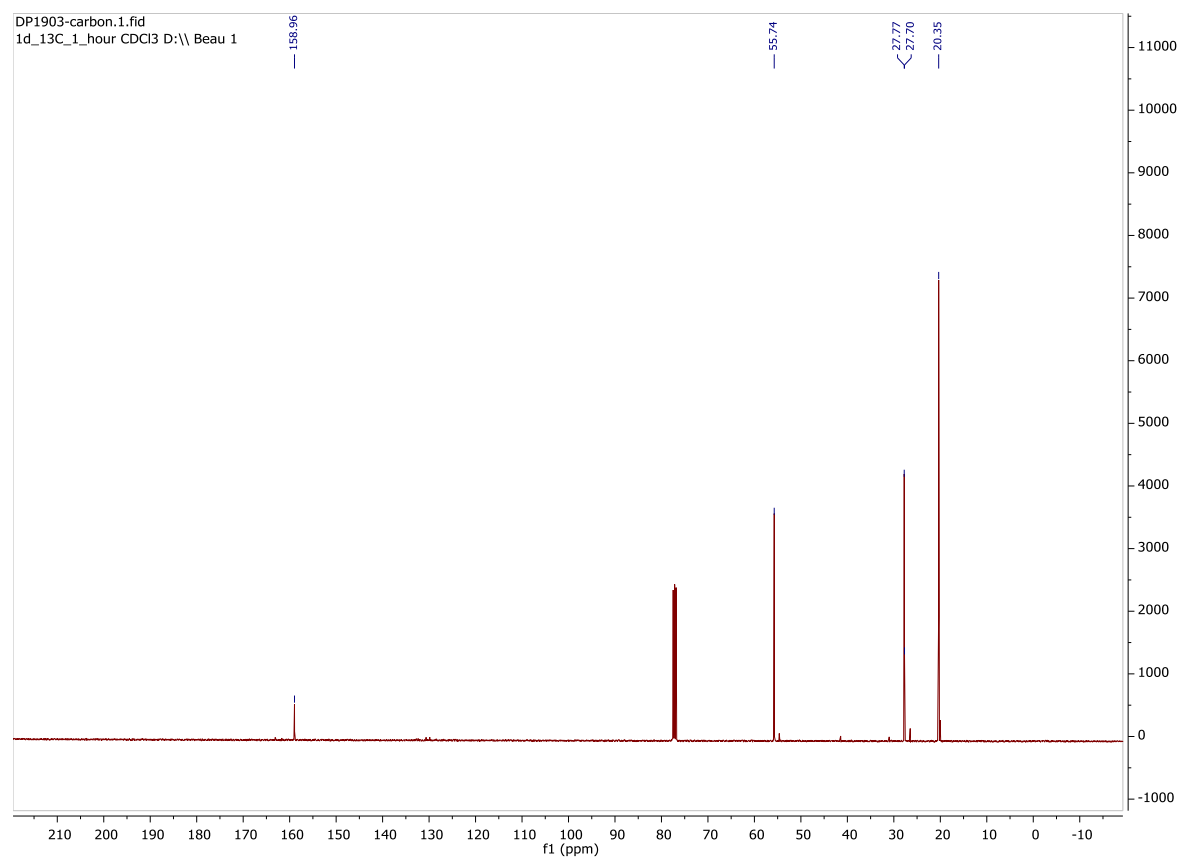

**Figure S3.** Radical trap experiments using BHT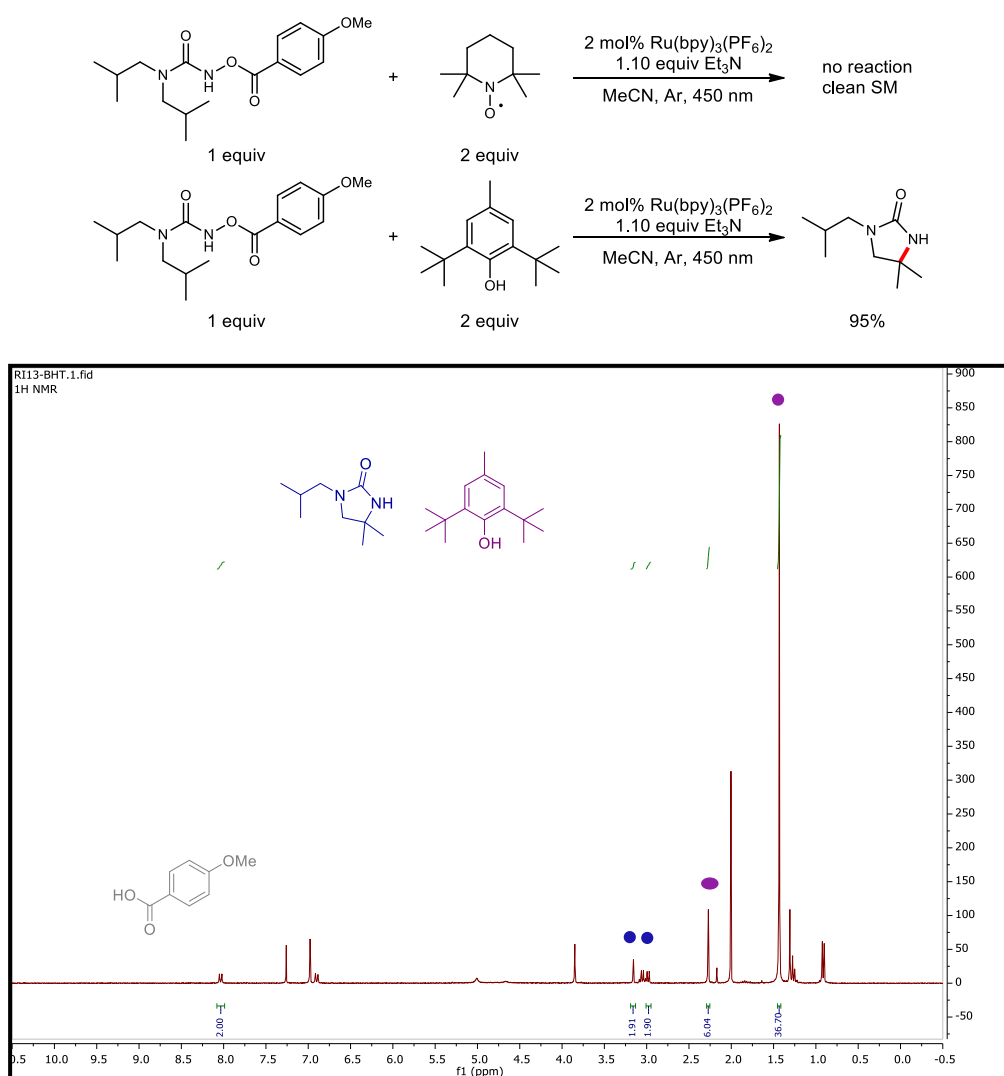

BHT is known to perturb reactions involving 1,5- and 1,6-HAT pathways.<sup>5</sup> Therefore, the fact that BHT had no effect on this reaction was inconsistent with an SET induced radical pathway. However, this finding would fit well within the framework of a triplet nitrene C-H amination. However, TEMPO led to starting material recover. It is possible that TEMPO engaged in redox reactions with the excited photocatalyst, diminishing its ability to engage in productive EnT with the nitrene precursors.

<sup>5</sup> (a) Yuan, W.; Zhou, Z.; Gong, L.; Meggers, E. *Chem. Commun.* **2017**, 53, 8964-8967. (b) Ma, Z.Y.; Guo, L.-N.; You, Y.; Yang, F.; Hu, M.; Duan, X.-H. *Org. Lett.* **2019**, 21, 5500-5504. (c) Bao, X.; Wang, Q.; Zhu, J. *Nat. Commun.* **2019**, 10, 769.

## HPLC

Figure S4. HPLC spectrum of **1k**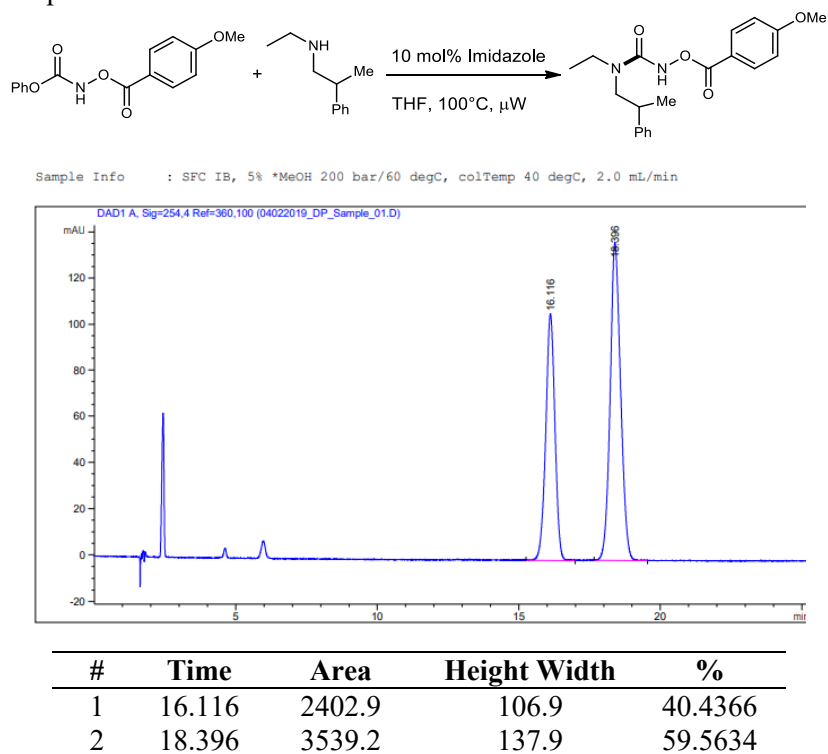Figure S5. HPLC spectrum of enantioenriched **1an**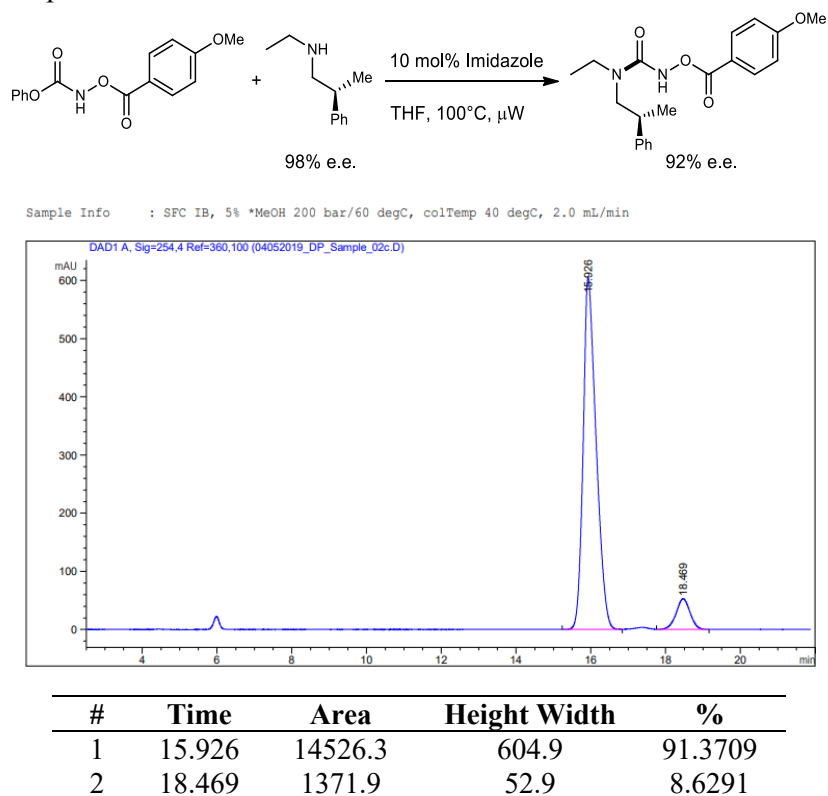

**Figure S6.** HPLC spectrum of **2k** from photocatalytic C-H amination of **1k**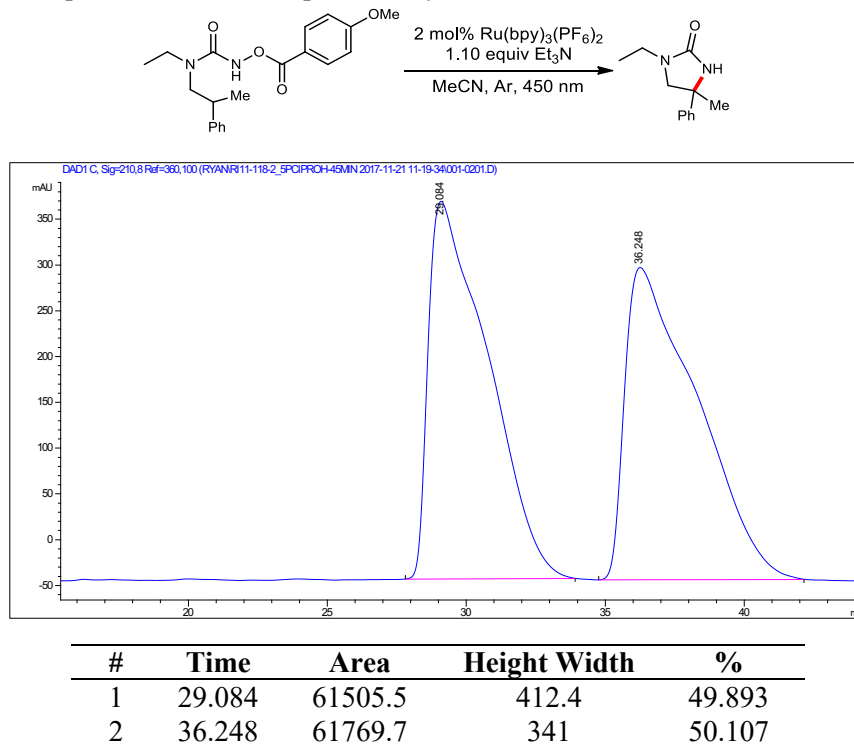**Figure S7.** HPLC spectrum of **2k** from photocatalytic C-H amination of enantioenriched **1an**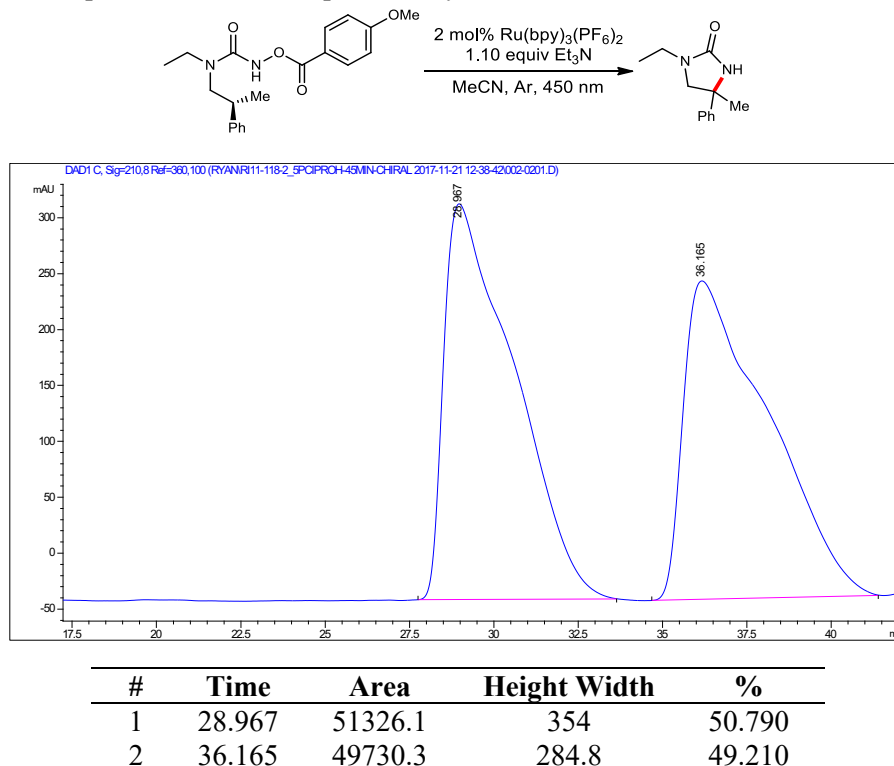

**Cyclic voltammetry**

Cyclic voltammetry was performed using a Princeton Applied Research Versastat 3 potentiostat employing a glass cell and platinum auxiliary wires for the counter and pseudo-reference electrodes, where a 1.6 mm platinum disk electrode was used for the working electrode. The measurements were carried out in CH<sub>3</sub>CN solutions (dried by J. C. Meyer solvent system and stored over molecular sieves) containing 0.1 M tetrabutylammonium hexafluorophosphate (Sigma Aldrich) as supporting electrolyte with a scan rate of 100 mV/s. The experiments were referenced to the Fc/Fc<sup>+</sup> redox couple of ferrocene (Sigma Aldrich).

**Figure S9.** Cyclic voltammetry of **1a**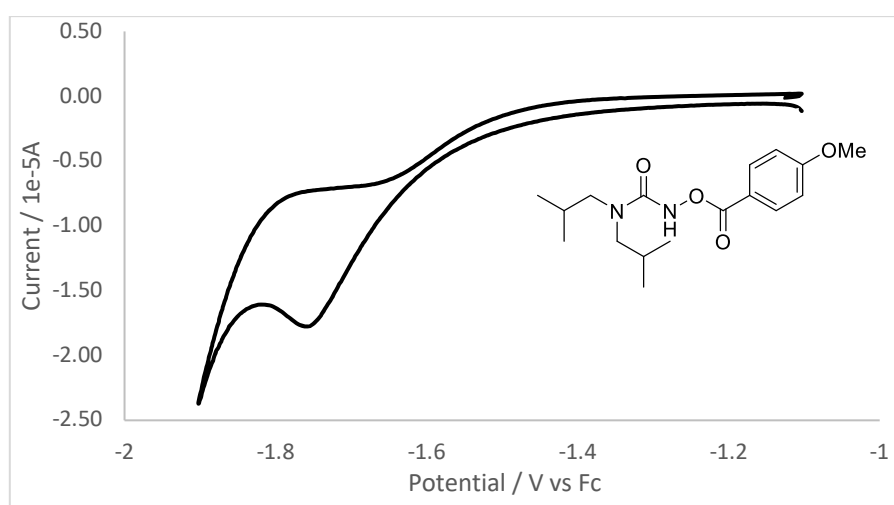

Irreversible reduction at -1.75V vs Fc<sup>+</sup>/Fc.

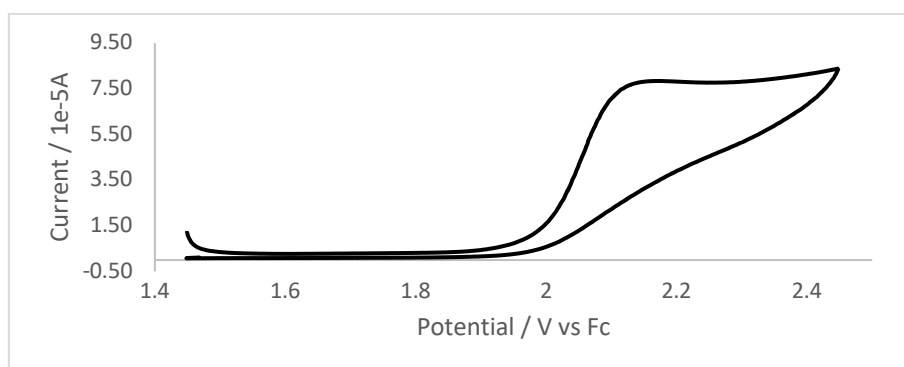

Irreversible oxidation at +2.15V vs Fc<sup>+</sup>/Fc.

**Figure S10.** Cyclic voltammetry of **1h**

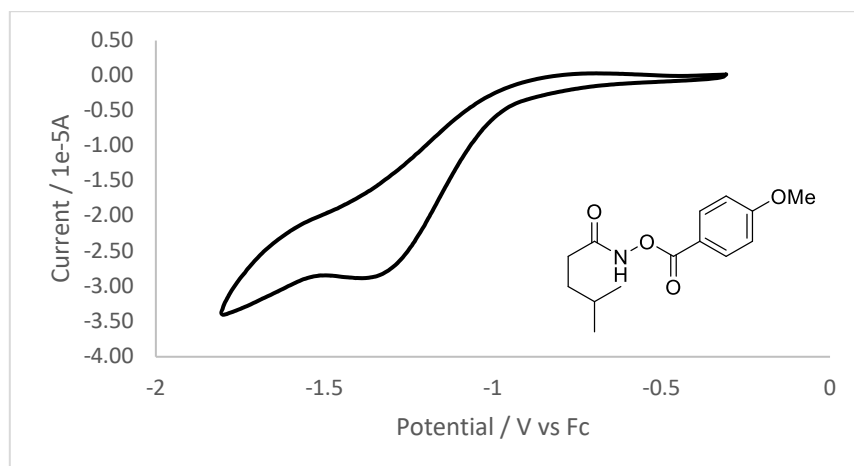

Irreversible reduction at -1.36 vs  $\text{Fc}^+/\text{Fc}$

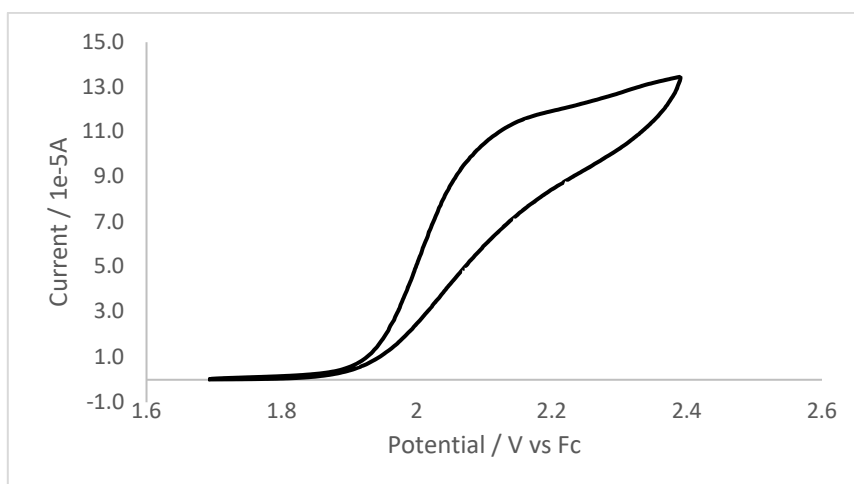

Irreversible oxidation at +2.13 vs  $\text{Fc}^+/\text{Fc}$

**Figure S11.** Cyclic voltammetry of **1am**

No reduction was observed at potential -2.3 V vs  $\text{Fc}^+/\text{Fc}$ .

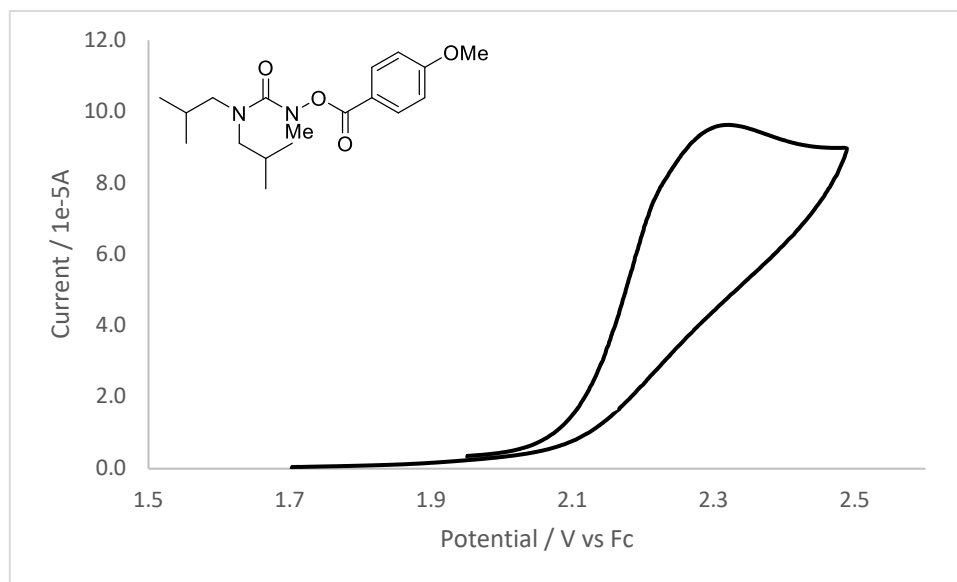

Irreversible oxidation at +2.30 vs  $\text{Fc}^+/\text{Fc}$



Alternate mechanism considered: single electron  $\alpha$ -elimination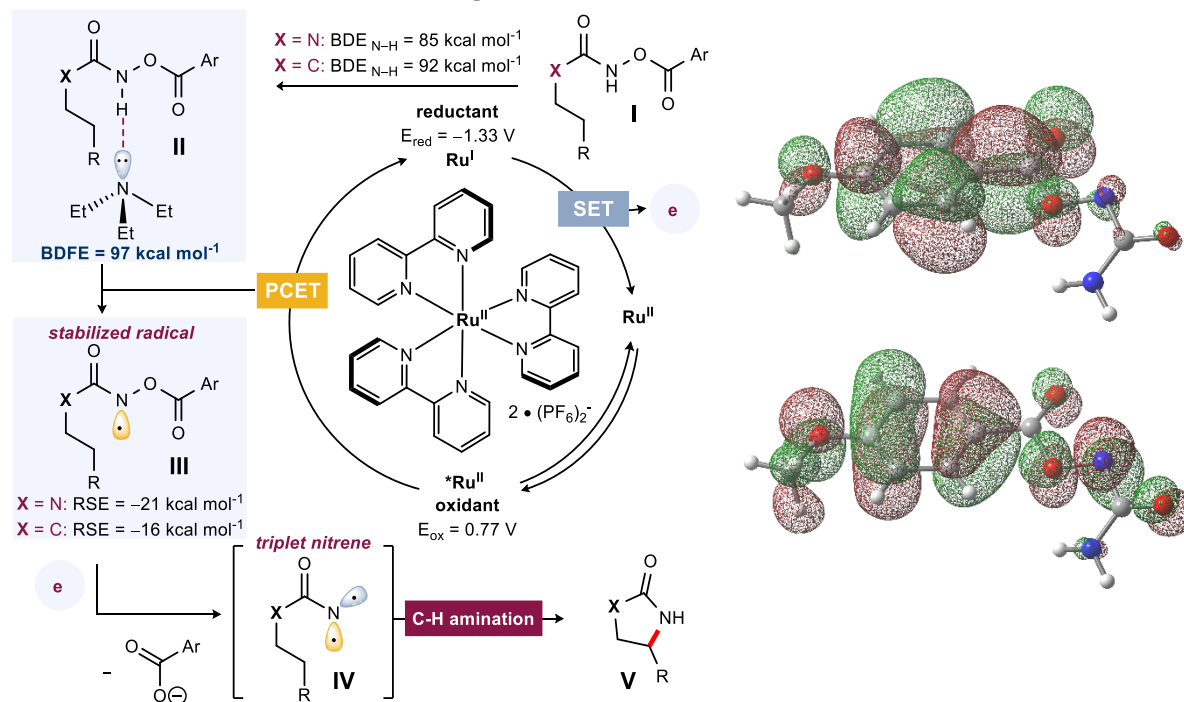

Scheme S6. Alternative mechanism invoking sequential PCET oxidation / reduction

An alternative mechanism (**Scheme S6**) begins with **I** forming H-bonded complex **II**, which undergoes PCET with Ru<sup>II\*</sup> (BDFE = 97 kcal/mol)<sup>6</sup> to produce stabilized radical **III**. A radical stabilization energy (RSE) of -21 kcal/mol was calculated for **III** by DFT using B3LYP 6-311+G(2d,p) indicating a substantial degree of stabilization (persistent radical DPPH = -27 kcal/mol). The PCET is therefore a highly exergonic process ( $\Delta G = -12$  kcal/mol) and **III** can then undergo SET reduction by Ru<sup>I</sup> ( $E_{\text{red}} = -1.33$  V). Analysis of the putative *N*-centered radical **III** highlights that SET reduction should be significantly favoured over reduction of **I** ( $E_{\text{red(I)}} = -1.8$  V). Visualization of the LUMO by DFT indicates that addition to the carbonyl electrophore would be preferred. Nocera recently calculated the rates of back-electron-transfer (BET)<sup>7</sup> in photochemical PCET reactions of amides. In the proposed mechanism, rapid BET in the presence of a more suitable electrophore should lead to the desired reaction outcome. This not only provides a rationale for the increased rate of conversion observed with the *N*-H vs. *N*-methyl urea precursors, but also justifies the use of *p*-methoxy benzoate precursors to facilitate the careful orchestration of events required to access the triplet nitrene. Reductive N-O bond cleavage from **III** expels the carboxylate via 1-electron  $\alpha$ -elimination to provide triplet nitrene **IV** and C-H amination then leads to the products **V**. While to our knowledge such a 1-electron  $\alpha$ -elimination process has not been reported, each individual step is well-precedented: 1) PCET is an effective strategy to form amidyl radicals from mildly acidic N-H bonds by an oxidative pathway.<sup>8</sup> 2) Reductive-quenching is efficient to form amidyl radicals by reductive SET-initiated N-O bond cleavage.<sup>9</sup> In this system, the adjacent oxygen atom of the hydroxylamine derivative should facilitate PCET by: 1) lowering the pK<sub>a</sub><sup>10</sup> of the N-H bond, and 2) increasing the stability of the generated *N*-radical by a captodative effect.<sup>11</sup> In addition, precedent for 1-electron  $\alpha$ -elimination emerged during the course of this study,

<sup>6</sup> BDFE were calculated using the formula: Formal BDFE (kcal/mol) = 2.3RTpKa + 23.06E + 54.9 (MeCN).

<sup>7</sup> Ruccolo, S.; Qin, Y.; Schnedermann, C.; Nocera, D. G. *J. Am. Chem. Soc.* **2018**, *140*, 14926–14937.

<sup>8</sup> (a) Gentry, E. C.; Knowles, R. R. *Acc. Chem. Res.* **2016**, *49*, 1546–1556. (b) Zheng, S.; Gutiérrez-Bonet, Á.; Molander, G. A. *Chem* **2019**, *5*, 339–352.

<sup>9</sup> Davies, J.; Svejstrup, T. D.; Fernandez Reina, D.; Sheikh, N. S.; Leonori, D. *J. Am. Chem. Soc.* **2016**, *138*, 8092–8095.

<sup>10</sup> Bordwell, F. G.; Fried, H. E.; Hughes, D. L.; Lynch, T. Y.; Satish, A. V.; Whang, Y. E. *J. Org. Chem.* **1990**, *55*, 3330–3336.

<sup>11</sup> Hioe, J.; Šakić, D.; Vrčec, V.; Zipse, H. *Org. Biomol. Chem.* **2015**, *13*, 157–169.

with a detailed study on the photogeneration of a Rh<sub>2</sub> nitrenoid from chloramine-T, although synthetic applications were not evaluated.<sup>12</sup>

## General Procedures

### General Procedure A: Substitution of *N*-hydroxycarbamates<sup>13</sup>

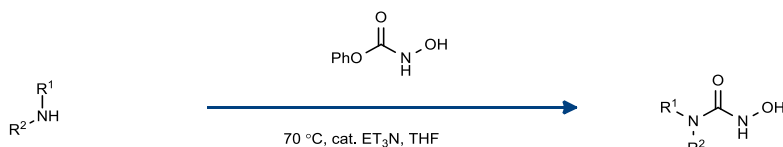

To a 5.0 mL microwave vial charged with a stir bar was added the phenyl *N*-hydroxycarbamate (1.10 equiv.), then THF (0.30 M), to which was added triethylamine (0.20 equiv.) and the corresponding amine (1.00 equiv.). The vial was sealed with a microwave cap and heated for 16 h at 70 °C via conventional (oil bath) heating. Solvent was removed under reduced pressure and the products were then purified by silica gel chromatography to give the corresponding pure hydroxyureas.

### General Procedure B: Synthesis of *N*-oxycarbamates<sup>13</sup>

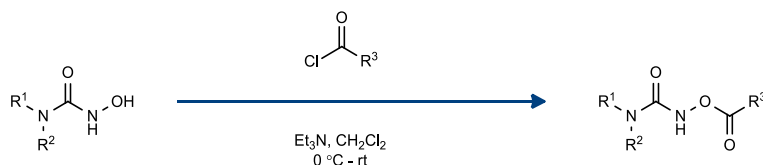

To a roundbottom flask charged with a stir bar was added *N*-hydroxycarbamate (1.00 equiv.) then CH<sub>2</sub>Cl<sub>2</sub> (0.30 M) and allowed to stir at 0 °C. \*Hydroxycarbamates are insoluble and will not always dissolve completely before the next step of the reaction\* Upon observing most of the hydroxycarbamate dissolve, Et<sub>3</sub>N was added (1.00 equiv.) and finally the acyl chloride was added dropwise (1.00 equiv.). The reaction was allowed to warm gradually to room temperature. Upon completion, H<sub>2</sub>O was added and the reaction mixture was extracted with CH<sub>2</sub>Cl<sub>2</sub>. The organic layer was recollected and washed with a saturated NaHCO<sub>3</sub> solution, and then the organic phase was recollected and washed with brine. The organic phase was dried over Na<sub>2</sub>SO<sub>4</sub> (stirring for 15 minutes). Solids were filtered and the filtrate was collected and concentrated under reduced pressure to give the corresponding pure acyloxycarbamates.

### General Procedure C: Substitution of *N*-acyloxycarbamates<sup>13</sup>

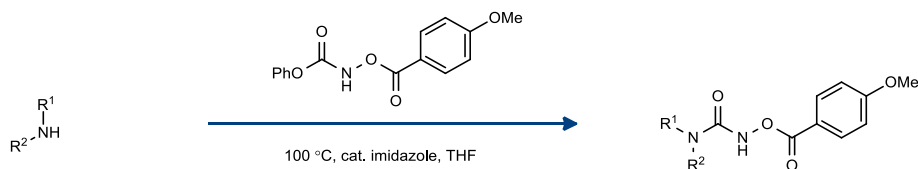

To a 5 mL microwave vial charged with a stir bar was added the phenyl *N*-acyloxycarbamate (1.00 equiv.), then THF (0.2 M), to which was added the corresponding amine (1.05 equiv.) and then imidazole (0.10 equiv.). The vial was sealed with a microwave cap and heated for 1-3 hours at 100 °C

<sup>12</sup> Das, A.; Maher, A. G.; Telser, J.; Powers, D. C. *J. Am. Chem. Soc.* **2018**, *140*, 10412-10415.

<sup>13</sup> Allen, M. A.; Ivanovich, R. A.; Polat, D. E.; Beauchemin, A. M. *Org. Lett.* **2017**, *19*, 6574.

via microwave irradiation. The reaction mixture was diluted with EtOAc and transferred to a separatory funnel, then washed twice with 1 M NaOH and once with brine, dried over MgSO<sub>4</sub>, filtered and concentrated under reduced pressure to give the corresponding pure acyloxyureas. In some cases, a higher degree of purity was needed after the extraction and the products could be recrystallized or purified by silica gel chromatography.

**General Procedure D: Synthesis of *N*-oxyureas via carbamoyl chloride formation**

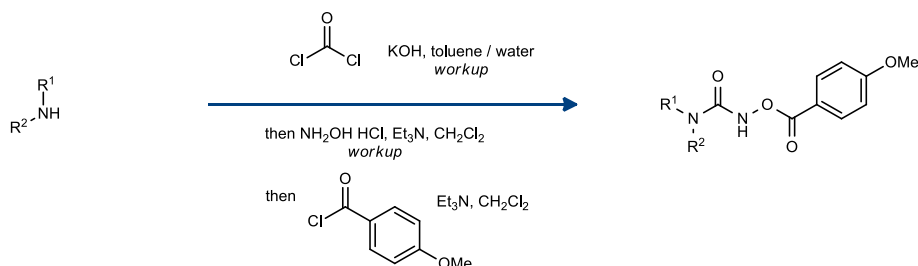

To a clean 50 mL round bottom flask charged with a stir bar was added the amine (1.00 equiv.) then PhMe (0.8 M) to which was added KOH pellets (1.00 equiv.) and water (2.9 M). A dripping funnel was affixed on top of the roundbottom flask and this apparatus was purged with argon for 10 minutes at 0 °C. Phosgene (15% in toluene) (2.30 equiv.) was added to the dripping funnel under inert atmosphere, and was allowed to drip over 1 hour at 0 °C while stirring vigorously. The reaction was allowed to stir for an additional 30 minutes after complete addition of phosgene solution. Upon completion, the crude reaction mixture was bubbled with an argon balloon for 20 minutes in a well ventilated fumehood, to release any excess phosgene gas. The crude reaction mixture was then extracted to remove the aqueous layer, and then the organic phase was washed with brine (5 mL x1). The organic phase was collected and dried with Na<sub>2</sub>SO<sub>4</sub>. The solids were filtered over a cotton plug, and the filtrate was evaporated under reduced pressure to provide the crude carbamoyl chloride which was used in the next step without further purification.

To the crude carbamoyl chloride was added CH<sub>2</sub>Cl<sub>2</sub> (0.30 M) and cooled to 0 °C. To this was added hydroxylamine hydrochloride (1.00 equiv.), and followed immediately by Et<sub>3</sub>N (2.00 equiv.). The reaction was allowed to warm to room temperature and stir overnight. Upon completion, the reaction was extracted with NaHCO<sub>3</sub> (5.0 mL x1), and then brine (5.0 mL x1). The organic phase was collected and dried with Na<sub>2</sub>SO<sub>4</sub>. The solids were filtered over a cotton plug, and the filtrate was evaporated under reduced pressure to provide the crude *N*-hydroxyurea, which could be used in the next step without further purification.

To the crude *N*-hydroxyurea was added CH<sub>2</sub>Cl<sub>2</sub> (0.30 M) and cooled to 0 °C. To this was added Et<sub>3</sub>N (1.00 equiv.) followed immediately by addition of *p*-methoxybenzoylchloride (1.00 equiv.). The reaction was allowed to warm to room temperature and stirred overnight. Upon completion, the reaction was extracted with NaHCO<sub>3</sub> (5.0 mL x1), and then brine (5.0 mL x1). The organic phase was collected and dried with Na<sub>2</sub>SO<sub>4</sub>. The solids were filtered over a cotton plug, and the filtrate was evaporated under reduced pressure to provide the crude *N*-oxyurea which was be recrystallized or purified by silica gel chromatography.

General Procedure E: **Synthesis of hydroxamic acids**<sup>14</sup>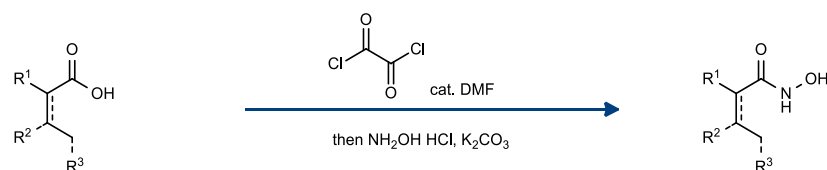

To a clean 50 mL round bottom flask charged with a stir bar was added the carboxylic acid (1.00 equiv.), then  $\text{CH}_2\text{Cl}_2$  (0.07 M) and cooled to 0 °C. To this was added oxalyl chloride (2.00 equiv.) and DMF (2 drops) and the reaction was allowed to stir for an additional 2.5 to 4 hours at room temperature. Upon completion, the crude reaction was evaporated under reduced pressure to provide the crude hydroxamic acid which was used in the next step without further purification.

To a clean 50 mL round bottom flask charged with a stir bar was added the hydroxylamine hydrochloride (1.20 equiv.), then a 2:1 mixture of EtOAc and  $\text{H}_2\text{O}$  (0.08 M) and cooled to 0 °C. To this was added  $\text{K}_2\text{CO}_3$  (2.00 equiv.) and the crude hydroxamic acid was added dropwise. The reaction was allowed to stir for 12 hours at room temperature. Upon completion, the reaction was separated and extracted twice with EtOAc (20 mL x2). The organic phase was collected and dried with  $\text{Na}_2\text{SO}_4$ . The solids were filtered over a cotton plug, and the filtrate was evaporated under reduced pressure to provide the crude *N*-oxyurea which was be recrystallized or purified by silica gel chromatography.

General Procedure F: **Synthesis of *N*-*p*-methoxybenzoylhydroxamic acid**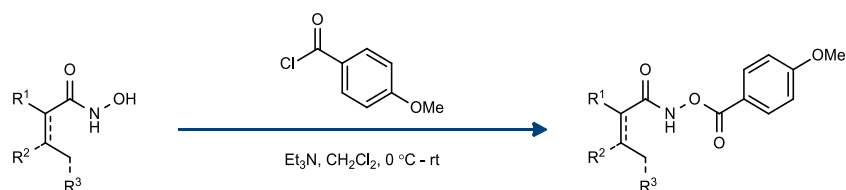

To a clean 50 mL round bottom flask charged with a stir bar was added the pure hydroxamic acid (1.00 equiv.), then  $\text{CH}_2\text{Cl}_2$  (0.30 M) and cooled to 0 °C. To this was added  $\text{Et}_3\text{N}$  (1.00 equiv.) followed immediately by portionwise addition of *p*-methoxybenzoylchloride (1.00 equiv.). The reaction was allowed to warm to room temperature and stirred overnight. Upon completion, the reaction was extracted with  $\text{NaHCO}_3$  (5.0 mL x2), and then brine (5.0 mL x1). The organic phase was collected and dried with  $\text{Na}_2\text{SO}_4$ . The solids were filtered over a cotton plug, and the filtrate was evaporated under reduced pressure to provide the crude *N*-*p*-methoxybenzoylhydroxamic acid which was be recrystallized or purified by silica gel chromatography.

General Procedure G: **Photoinduced C-H amination of *N*-oxyureas.**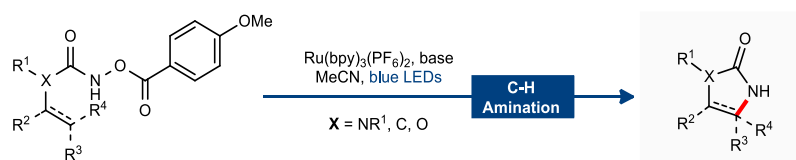

To a 8 mL Kimax glass vial charged with a stir bar was added the *N*-oxyurea (1.00 equiv.), then MeCN (0.2m), to which was added tris(2,2'-bipyridine)ruthenium(II) hexafluorophosphate (2 mol%), and then

<sup>14</sup> Hong, S.Y.; Park, Y.; Hwang, Y.; Kim, Y. B.; Baik, M.-H.; Chang, S. *Science* **2018**, 359, 1016.

base triethylamine (1.10 equiv.) or tetrabutylammonium dibutylphosphate (5 mol%). The vial was closed with Teflon screw cap and was placed in an ice bath and purged with Argon for 10 min. The vial was positioned between 2 and 4 cm from the light source (blue LED strips) and allowed to stir overnight at ambient temperature. Upon completion, the reaction was concentrated under reduced pressure, diluted in  $\text{CH}_2\text{Cl}_2$  (5.0 mL) and extracted three times with sodium bicarbonate (3 x 2 mL) to remove the benzoic acid. The organic phase was collected, dried with  $\text{Na}_2\text{SO}_4$ , filtered, and concentrated under reduced pressure. The title compound was purified by silica gel chromatography.

## Characterization Data

### Synthesis of phenyl *N*-hydroxycarbamate

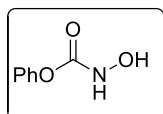

**Phenyl *N*-hydroxycarbamate (4a):** The title compound was synthesized according to a literature procedure.<sup>13</sup>

**<sup>1</sup>H NMR (300 MHz, DMSO-*d*<sub>6</sub>):**  $\delta$  10.43-10.15 (br s, 1 H), 9.11-9.03 (br s, 1H), 7.45-7.33 (m, 2H), 7.26-7.17 (m, 1H), 7.14-7.06 (m, 2H).

**<sup>13</sup>C NMR (100 MHz, DMSO-*d*<sub>6</sub>):** 155.5 (C), 150.7 (C), 129.4 (CH), 125.1 (CH), 121.6 (CH).

The <sup>1</sup>H NMR and <sup>13</sup>C NMR is in agreement with previous reports.

### Synthesis of *N*-acyloxycarbamates

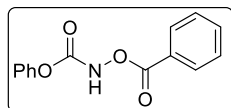

**Phenyl *N*-benzoyloxycarbamate (4b):** The title compound was synthesized according to a literature procedure.<sup>13</sup>

**<sup>1</sup>H NMR (300 MHz, CDCl<sub>3</sub>):**  $\delta$  8.66 (br s, 1H), 8.11 (d,  $J$  = 7.9 Hz, 2H), 7.66-7.61 (m, 1H), 7.48 (t,  $J$  = 7.8 Hz, 2H), 7.39-7.34 (m, 2H), 7.25-7.16 (m, 3H).

**<sup>13</sup>C NMR (100 MHz, CDCl<sub>3</sub>):**  $\delta$  165.7 (C), 154.7 (C), 150.1 (C), 134.3 (CH), 129.9 (CH), 129.4 (CH), 128.7 (CH), 126.4 (C), 126.1 (CH), 121.2 (CH).

The <sup>1</sup>H NMR and <sup>13</sup>C NMR is in agreement with previous reports.

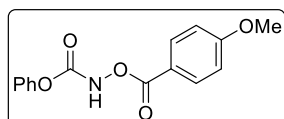

**Phenyl (4-methoxybenzoyl)oxycarbamate (4c):** The title compound was synthesized according to a literature procedure.<sup>13</sup>

**<sup>1</sup>H NMR (300 MHz, CDCl<sub>3</sub>):**  $\delta$  8.82 (br s, 1H), 8.10 (d,  $J$  = 8.9 Hz, 2H), 7.40 (t,  $J$  = 7.8 Hz, 2H), 7.28-7.20 (m, 3H), 6.98 (d,  $J$  = 8.9 Hz, 2H), 3.89 (s, 3H).

**$^{13}\text{C}$  NMR (100 MHz,  $\text{CDCl}_3$ ):**  $\delta$  165.5 (C), 164.6 (C), 154.9 (C), 150.3 (C), 132.3 (CH), 129.6 (CH), 126.2 (CH), 121.3 (CH), 118.6 (C), 114.2 (CH), 55.6 ( $\text{CH}_3$ ).

The  $^1\text{H}$  NMR and  $^{13}\text{C}$  NMR is in agreement with previous reports.

### Synthesis of *N*-oxyureas

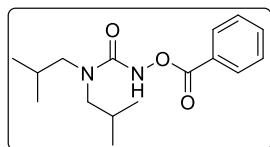

**3-(Benzoyloxy)-1,1-diisobutylurea (1a):** The title compound was synthesized according to a literature procedure.<sup>13</sup>

**$^1\text{H}$  NMR (400 MHz,  $\text{CDCl}_3$ ):**  $\delta$  8.56 (br s, 1H), 8.11 (dd,  $J$  = 8.4, 1.1 Hz, 2H), 7.62-7.58 (m, 1H), 7.46 (t,  $J$  = 7.8 Hz, 2H), 3.14 (d,  $J$  = 7.6 Hz, 4H), 2.16-1.97 (m, 2H), 0.95 (d,  $J$  = 6.7 Hz, 12H).

**$^{13}\text{C}$  NMR (100 MHz,  $\text{CDCl}_3$ ):**  $\delta$  167.3 (C), 158.1 (C), 134.1 (C), 130.0 (CH), 128.7 (CH), 127.3 (CH), 55.1 ( $\text{CH}_2$ ), 27.3 (CH), 20.3 ( $\text{CH}_3$ ).

The  $^1\text{H}$  NMR and  $^{13}\text{C}$  NMR is in agreement with previous reports.

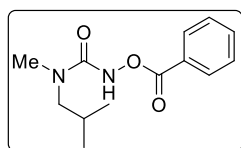

**3-(Benzoyloxy)-1-isobutyl-1-methylurea (1b):** The title compound was synthesized according to general procedure C using phenyl benzoyloxycarbamate (1.29 g, 5.00 mmol), and *N*-methylisobutylamine (0.60 mL, 5.0 mmol) and imidazole (0.034 g, 0.50 mmol) in THF (16.7 mL, 0.30 M).

The reaction was heated under microwave irradiation for 2 h at 100 °C Solvent was removed under reduced pressure and the crude product isolated using flash chromatography (30% EtOAc/Et<sub>2</sub>O) to yield the title compound as a colourless oil (1.05 g, 84%).

**TLC  $R_f$ :** 0.30 in 20% EtOAc/Hexanes.

**$^1\text{H}$  NMR (400 MHz,  $\text{CDCl}_3$ ):**  $\delta$  8.54-8.43 (br s., 1H), 8.17-8.10 (m, 2H), 7.67-7.58 (m, 1H), 7.53-7.44 (m, 2H), 3.17 (d,  $J$  = 7.7 Hz, 2H), 3.02 (s, 3H), 2.04-1.97 (m, 1H), 0.96 (d,  $J$  = 6.6 Hz, 6H).

**$^{13}\text{C}$  NMR (100 MHz,  $\text{CDCl}_3$ ):**  $\delta$  167.0 (C), 157.9 (C), 134.0 (CH), 129.9 (CH), 128.6 (CH), 127.1 (C), 56.6 ( $\text{CH}_2$ ), 34.6 (CH), 27.2 (CH), 20.0 (CH).

**IR (FTIR):** 3269, 2657, 1747, 167, 1489, 1243  $\text{cm}^{-1}$ .

**HRMS (ESI)  $m/z$ :** Exact mass calcd for  $\text{C}_{13}\text{H}_{18}\text{N}_2\text{O}_3\text{Na}$  [ $\text{M}+\text{Na}$ ]<sup>+</sup>: 273.1317. Found: 273.1302.

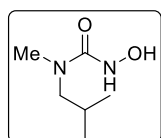

**1-Isobutyl-1-methyl-3-hydroxyurea (4d):** The title compound was synthesized according to general procedure A using phenyl *N*-hydroxycarbamate (0.841 g, 5.50 mmol), and *N*-methylisobutylamine (0.436 g, 5.00 mmol) and Et<sub>3</sub>N (0.14 mL, 1.0 mmol) in THF (16.6 mL, 0.30 M). The vial was sealed with a microwave cap and heated

for 16 h at 70 °C via an oil bath heating. The reaction mixture was concentrated under reduced pressure and isolated using flash chromatography (2% MeOH/ $\text{CH}_2\text{Cl}_2$ ). The title compound was obtained as an amorphous white solid (0.530 g, 73%).

**TLC R<sub>f</sub>:** 0.12 in 2% MeOH/CH<sub>2</sub>Cl<sub>2</sub>.

**<sup>1</sup>H NMR (400 MHz, CDCl<sub>3</sub>):** δ 7.07-6.95 (br s, 1H), 6.86-6.77 (br s, 1H), 3.09 (d, *J* = 7.6 Hz, 2H), 2.89 (s, 3H), 2.02-1.86 (m, 1H), 0.90 (d, *J* = 6.7 Hz, 3H).

**<sup>13</sup>C NMR (100 MHz, CDCl<sub>3</sub>):** δ 161.8 (C), 56.2 (CH<sub>2</sub>), 34.1 (CH<sub>3</sub>), 27.2 (CH), 19.9 (CH<sub>3</sub>).

**IR (FTIR):** 3220, 2956, 1615, 1521, 1386, 1287, 1108 cm<sup>-1</sup>.

**HRMS (EI) m/z:** Exact mass calcd for C<sub>6</sub>H<sub>14</sub>N<sub>2</sub>O<sub>2</sub> [M]<sup>+</sup>: 146.1055. Found: 146.1040.

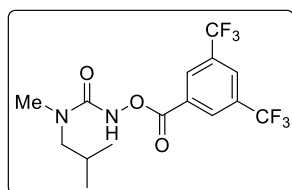

**3-((3,5-Bistrifluoromethylbenzoyl)oxy)-1-isobutyl-1-methylurea (1c):**

The title compound was synthesized according to general procedure C using the pure 1-isobutyl-1-methyl-3-hydroxyurea (0.530 g, 3.60 mmol) was added CH<sub>2</sub>Cl<sub>2</sub> (0.30 M) and cooled to 0 °C. To this was added Et<sub>3</sub>N (0.50 mL, 3.60 mmol) followed immediately by dropwise addition of 3,5-bis(trifluoromethyl)benzoyl chloride (0.65 mL, 3.60 mmol). The reaction was allowed to warm to room temperature and stirred overnight. Upon completion, the reaction was extracted with NaHCO<sub>3</sub> (5.0 mL x1), and then brine (5.0 mL x1). The organic phase was collected and dried with Na<sub>2</sub>SO<sub>4</sub>. The solids were filtered over a cotton plug, and the filtrate was evaporated under reduced pressure to provide the crude which was purified by flash column chromatography (20% EtOAc/Hexanes). The title compound was obtained as an amorphous white solid (0.831 g, 60%).

**TLC R<sub>f</sub>:** 0.94 in 2% MeOH/CH<sub>2</sub>Cl<sub>2</sub>.

**<sup>1</sup>H NMR (400 MHz, CDCl<sub>3</sub>):** δ 8.58-8.56 (br s, 2H), 8.43-8.41 (br s, 1H), 8.14-8.11 (br s, 1H), 3.17 (d, *J* = 7.4 Hz, 2H), 3.03 (s, 3H), 2.07-1.95 (m, 1H), 0.97 (d, *J* = 6.7 Hz, 6H).

**<sup>13</sup>C NMR (100 MHz, CDCl<sub>3</sub>):** δ 164.7 (C), 157.3 (C), 132.5 (C, q, *J* = 23 Hz), 130.0 (CH, m), 129.5 (C), 127.3 (CH, m), 122.6 (C, d, *J* = 203 Hz), 56.6 (CH<sub>2</sub>), 34.6 (CH), 27.1 (CH), 19.9 (CH<sub>3</sub>).

**IR (FTIR):** 2697, 1767, 1664, 1221, 1127, 697 cm<sup>-1</sup>.

**HRMS (ESI) m/z:** Exact mass calcd for C<sub>15</sub>H<sub>16</sub>N<sub>2</sub>O<sub>3</sub>F<sub>6</sub>Na [M+Na]<sup>+</sup>: 409.0963. Found: 409.0983.

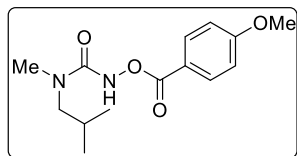

**1-Isobutyl-3-((4-methoxybenzoyl)oxy)-1-methylurea (1d):** The title compound was synthesized according to general procedure C using phenyl (4-methoxybenzoyl)oxycarbamate (0.862 g, 3.00 mmol), and *N*-methylisobutylamine (0.262 g, 3.00 mmol) and imidazole (0.020 g, 0.30 mmol) in THF (10.0 mL, 0.30 M). The reaction was heated under microwave

irradiation for 2 h at 100 °C. Solvent was removed under reduced pressure and the crude product isolated using flash chromatography (10% EtOAc/Hexanes → 33% EtOAc/Hexanes) to yield the title compound as an amorphous white solid (0.800 g, 95%).

**TLC R<sub>f</sub>:** 0.36 in 40% EtOAc/Hexanes.

**<sup>1</sup>H NMR (300 MHz, CDCl<sub>3</sub>):** δ 8.50-8.37 (br s, 1H), 8.12-7.99 (m, 2H), 7.04-6.86 (m, 2H), 3.85 (s, 3H), 3.14 (d, *J* = 10.7 Hz, 2H), 2.98 (s, 3H), 1.98 (dquintet, *J* = 13.8, 6.9 Hz, 1H), 0.93 (d, *J* = 6.7 Hz, 6H).

**<sup>13</sup>C NMR (100 MHz, CDCl<sub>3</sub>):** δ 166.9 (C), 164.3 (C), 158.1 (C), 132.2 (CH), 119.5 (C), 114.1 (CH), 56.7 (CH<sub>3</sub>), 55.6 (CH<sub>3</sub>), 51.4 (CH<sub>2</sub>), 34.9 (CH<sub>2</sub>), 27.4 (CH), 20.1 (CH<sub>3</sub>).

**IR (FTIR):** 3158, 3005, 2959, 1751, 1663, 1604, 1507, 1315, 1249, 1159 cm<sup>-1</sup>.

**HRMS (ESI) m/z:** Exact mass calcd for C<sub>14</sub>H<sub>20</sub>N<sub>2</sub>O<sub>4</sub>Na [M+Na]<sup>+</sup>: 303.1315. Found: 303.1325.

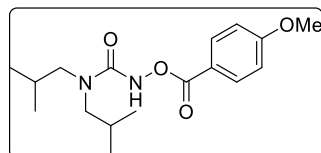

**1-Diisobutyl-3-((4-methoxybenzoyl)oxy)urea (1a'):** The title compound was synthesized according to general procedure C using phenyl (4-methoxybenzoyl)oxycarbamate (0.862 g, 3.00 mmol), and N,N-diisobutylamine (0.388 g, 3.00 mmol) and imidazole (0.020 g, 0.30 mmol) in THF (10.0 mL, 0.30 M). The reaction was heated under microwave irradiation for 2 h at 100 °C. Solvent was removed under reduced pressure and the crude product isolated using flash chromatography (20% EtOAc/hexanes) to yield the title compound as an amorphous off-white solid (0.940 g, 97%).

**TLC R<sub>f</sub>:** 0.28 in 20% EtOAc/Hexanes.

**<sup>1</sup>H NMR (400 MHz, CDCl<sub>3</sub>):** δ 8.51 (br s, 1H), 8.07-8.04 (m, 2H), 6.93-6.90 (m, 2H), 3.84 (s, 3H), 3.12 (d, *J* = 7.6 Hz, 4H), 2.04 (dq, *J* = 13.7, 6.9 Hz, 2H), 0.93 (d, *J* = 6.7 Hz, 12H).

**<sup>13</sup>C NMR (100 MHz, CDCl<sub>3</sub>):** δ 167.0 (C), 164.3 (C), 158.3 (C), 132.2 (CH), 119.5 (C), 114.1 (CH), 55.5 (CH<sub>3</sub>), 55.0 (CH<sub>2</sub>), 27.2 (CH), 20.2 (CH<sub>3</sub>).

**IR (FTIR):** 3186, 2954, 2870, 1748, 1655, 1605, 1509, 1484, 1316, 1242 cm<sup>-1</sup>.

**HRMS (ESI) m/z:** Exact mass calcd for C<sub>17</sub>H<sub>26</sub>N<sub>2</sub>O<sub>4</sub>Na [M+Na]<sup>+</sup>: 345.1785. Found: 345.1799.

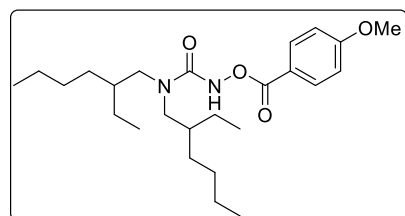

**3-((4-Methoxybenzoyl)oxy)-1,1-bis(2-methylhexyl)urea (1b'):** The title compound was synthesized according to a modified general procedure C using phenyl (4-methoxybenzoyl)oxycarbamate (0.639 g, 3.00 mmol), and bis(2-ethylhexyl)amine (0.640 g, 2.65 mmol) and imidazole (0.020 g, 0.30 mmol) in THF (10.0 mL, 0.30 M). The reaction was heated

under microwave irradiation for 2 h at 100 °C. Solvent was removed under reduced pressure and the crude product isolated using flash chromatography (10% EtOAc/hexanes) to yield the title compound as an amorphous off-white solid (0.917 g, 85%).

**TLC R<sub>f</sub>:** 0.40 in 10% EtOAc/Hexanes.

**<sup>1</sup>H NMR (300 MHz, DMSO-*d*<sub>6</sub>):** δ 10.21-10.18 (br s, 1H), 7.99-7.91 (m, 2H), 7.14-7.04 (m, 2H), 3.86 (s, 3H), 3.21-3.01 (m, 4H), 1.76-1.58 (m, 2H), 1.36-1.12 (m, 16H), 0.94-0.76 (m, 12H).

**<sup>13</sup>C NMR (100 MHz, DMSO-*d*<sub>6</sub>):** δ 165.5 (C), 163.4 (C), 158.4 (C), 131.9 (CH), 120.4 (C), 114.7 (CH), 56.1 (CH), 49.5 (CH<sub>2</sub>), 49.5 (CH<sub>2</sub>), 37.1 (CH), 30.2 (CH<sub>2</sub>), 28.6 (CH<sub>2</sub>), 23.6 (CH<sub>2</sub>), 23.0 (CH<sub>2</sub>), 14.4 (CH<sub>3</sub>), 11.0 (CH<sub>3</sub>).

**IR (FTIR):** 3177, 2959, 2925, 1756, 1658, 1509, 1241 cm<sup>-1</sup>.

**HRMS (ESI) m/z:** Exact mass calcd for C<sub>25</sub>H<sub>42</sub>N<sub>2</sub>O<sub>4</sub>Na [M+Na]<sup>+</sup>: 457.3043. Found: 457.3058.



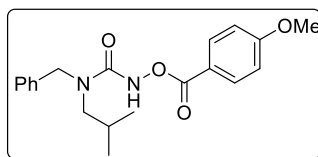

**1-Benzyl-1-isobutyl-3-((4-methoxybenzoyl)oxy)urea (1d')**: The title compound was synthesized according to general procedure **C** using phenyl (4-methoxybenzoyl)oxycarbamate (0.862 g, 3.00 mmol), and benzyl-2-methylpropan-1-amine (0.490 g, 3.00 mmol) and imidazole (0.020 g, 0.30 mmol) in THF (10.0 mL, 0.30 M). The reaction was heated under microwave irradiation for 2 h at 100 °C. Solvent was removed under reduced pressure and the crude product isolated using flash chromatography (20% EtOAc/hexanes) to yield the title compound as an amorphous off-white solid (0.930 g, 87%).

**TLC R<sub>f</sub>**: 0.28 in 20% EtOAc/Hexanes.

**<sup>1</sup>H NMR (400 MHz, CDCl<sub>3</sub>)**: δ 8.43 (br s, 1H), 8.06 (d, *J* = 9.0 Hz, 2H), 7.40-7.30 (m, 6H), 6.93 (d, *J* = 9.0 Hz, 2H), 4.59 (s, 2H), 3.86 (s, 3H), 3.17 (d, *J* = 7.5 Hz, 2H), 2.07 (quintet, *J* = 13.7, 6.9 Hz, 1H), 0.97 (d, *J* = 6.7 Hz, 6H).

**<sup>13</sup>C NMR (100 MHz, CDCl<sub>3</sub>)**: δ 166.7 (C), 164.2 (C), 158.5 (C), 136.5 (C), 132.1 (CH), 129.0 (CH), 127.8 (CH), 127.1, (CH), 119.4 (C), 113.9 (CH), 55.5 (CH<sub>3</sub>), 54.6 (CH<sub>2</sub>), 27.4 (CH), 20.2 (CH<sub>3</sub>).

**IR (FTIR)**: 3116, 2959, 2840, 1751, 1647, 1603, 1509, 1419, 1315, 1238 cm<sup>-1</sup>.

**HRMS (ESI) m/z**: Exact mass calcd for C<sub>20</sub>H<sub>24</sub>N<sub>2</sub>O<sub>4</sub>Na [M+Na]<sup>+</sup>: 379.1628. Found: 379.1634.

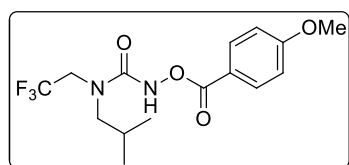

**1-Isobutyl-3-((4-methoxybenzoyl)oxy)-1-(2,2,2-trifluoroethyl)urea (1e)**: The title compound was synthesized according to general procedure **D** using *N*-propylaniline (1.55 g, 10.0 mmol), toluene (0.8 M), KOH pellets (0.561 g, 10.0 mmol), and water (2.9 M) at 0 °C. A dripping funnel was affixed on top of the roundbottom flask and this

apparatus was purged with argon for 10 minutes. Phosgene (15% in toluene) (16.4 mL, 23 mmol) was added to the dripping funnel under inert atmosphere, and was allowed to drip over 1 hour at 0 °C while stirring vigorously. The reaction was allowed to stir for an additional 30 minutes after complete addition of phosgene solution. Upon completion, the crude reaction mixture was bubbled with an argon balloon for 20 minutes in a well ventilated fumehood, to release any excess phosgene gas. The crude reaction mixture was then extracted to remove the aqueous layer, and then the organic phase was washed with brine (5.0 mL x1). The organic phase was collected and dried with Na<sub>2</sub>SO<sub>4</sub>. The solids were filtered over a cotton plug, and the filtrate was evaporated under reduced pressure to provide the crude isobutyl(2,2,2-trifluoroethyl)carbamic chloride which was used in the next step without further purification.

To the crude isobutyl(2,2,2-trifluoroethyl)carbamic chloride was added CH<sub>2</sub>Cl<sub>2</sub> (0.30 M) and cooled to 0 °C. To this was added hydroxylamine hydrochloride (0.691 g, 10.0 mmol), and followed immediately by Et<sub>3</sub>N (2.79 mL, 20.0 mmol). The reaction was allowed to warm to room temperature and stir overnight. Upon completion, the reaction was extracted with NaHCO<sub>3</sub> (5.0 mL x1), and then brine (5.0 mL x1). The organic phase was collected and dried with Na<sub>2</sub>SO<sub>4</sub>. The solids were filtered over a cotton plug, and the filtrate was evaporated under reduced pressure to provide the crude *N*-propylanilinehydroxyurea, which could be used in the next step without further purification.

To the crude 3-hydroxy-1-isobutyl-1-(2,2,2-trifluoroethyl)urea was added CH<sub>2</sub>Cl<sub>2</sub> (0.30 M) and cooled to 0 °C. To this was added Et<sub>3</sub>N (1.39 mL, 10.0 mmol) followed immediately by addition of *p*-methoxybenzoylchloride (1.70 g, 10.0 mmol). The reaction was allowed to warm to room temperature and stirred overnight. Upon completion, the reaction was extracted with NaHCO<sub>3</sub> (5.0 mL x1), and

then brine (5.0 mL x1). The organic phase was collected and dried with Na<sub>2</sub>SO<sub>4</sub>. The solids were filtered over a cotton plug, and the filtrate was evaporated under reduced pressure to provide the crude 1-isobutyl-3-((4-methoxybenzoyl)oxy)-1-(2,2,2-trifluoroethyl)urea which was purified by recrystallization with Et<sub>2</sub>O to yield a white crystalline solid (2.43 g, 70% over 3 steps).

**TLC R<sub>f</sub>:** 0.57 in 33% EtOAc/Hexanes.

**M.p.:** 105.8-106.2 °C.

**<sup>1</sup>H NMR (400 MHz, CDCl<sub>3</sub>):** δ 8.66 (br s, 1H), 8.07 (d, *J* = 9.0 Hz, 2H), 6.95 (d, *J* = 9.0 Hz, 2H), 4.01 (q, *J* = 8.8 Hz, 2H), 3.87 (s, 3H), 3.26 (d, *J* = 7.7 Hz, 2H), 2.13 (dsept, *J* = 13.7, 6.9 Hz, 1H), 0.99 (d, *J* = 6.7 Hz, 6H).

**<sup>13</sup>C NMR (100 MHz, CDCl<sub>3</sub>):** δ 166.4 (C), 164.4 (C), 158.1 (C), 132.2 (CH), 124.5 (q, *J* = 278 Hz, C), 118.9 (C), 114.0 (CH), 55.5 (CH<sub>3</sub>), 55.3 (CH<sub>2</sub>), 48.1 (q, *J* = 34 Hz, CH<sub>2</sub>), 27.1 (CH), 19.9 (CH<sub>3</sub>).

**IR (FTIR):** 3144, 2971, 2889, 2360, 1749, 1660, 1606, 1249, 1160, 1143 cm<sup>-1</sup>.

**HRMS (ESI) m/z:** Exact mass calcd for C<sub>15</sub>H<sub>19</sub>F<sub>3</sub>N<sub>2</sub>O<sub>4</sub>Na [M+Na]<sup>+</sup>: 371.1188. Found: 371.1195.

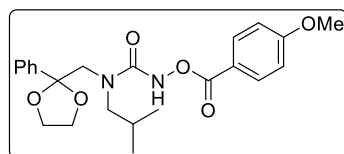

**1-Isobutyl-1-(2-phenyl-1,3-dioxolan-2-yl)isobutyl-3-((4-methoxybenzoyl)oxy)urea (1f):** The title compound was synthesized according to general procedure C using phenyl (4-methoxybenzoyl)oxycarbamate (0.574 g, 2.00 mmol), and isobutylamine (0.470 g, 2.00 mmol) and imidazole (0.014 g, 0.20 mmol) in THF (6.6 mL, 0.20 M). The reaction was heated under microwave irradiation for 2 h at 100 °C. The reaction mixture was concentrated under reduced pressure and isolated using flash chromatography (10% EtOAc/Hexanes). The title compound was obtained as an amorphous pale orange solid (0.770 g, 90%).

**TLC R<sub>f</sub>:** 0.24 in 20% EtOAc/Hexanes.

**<sup>1</sup>H NMR (400 MHz, CDCl<sub>3</sub>):** δ 10.28-10.21 (br s, 1H), 8.16-8.07 (m, 2H), 7.58-7.51 (m, 2H), 7.45-7.32 (m, 3H), 7.00-6.90 (m, 2H), 4.30-4.23 (m, 2H), 3.96-3.85 (m, 5H), 3.75-3.65 (br s, 2H), 3.33-3.21 (d, *J* = 6.9 Hz, 2H), 2.18-2.01 (m, 1H), 0.88 (d, *J* = 6.7 Hz, 6H).

**<sup>13</sup>C NMR (100 MHz, CDCl<sub>3</sub>):** δ 166.8 (C), 163.9 (C), 159.5 (C), 139.9 (C), 132.0 (CH), 128.8 (CH), 128.5 (CH), 125.7 (CH), 119.9 (C), 113.8 (CH), 110.6 (C), 65.4 (CH<sub>2</sub>), 56.7 (CH<sub>2</sub>), 55.4 (CH), 54.0 (CH<sub>2</sub>), 26.8 (CH), 20.1 (CH<sub>3</sub>).

**IR (FTIR):** 3221, 2941, 1740, 1691, 1468, 1257 cm<sup>-1</sup>.

**HRMS (ESI) m/z:** Exact mass calcd for C<sub>23</sub>H<sub>28</sub>N<sub>2</sub>O<sub>6</sub>Na [M+Na]<sup>+</sup>: 451.1845. Found: 451.1825.

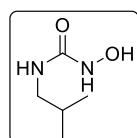

**1-Isobutyl-3-hydroxyurea (4.5):** The title compound was synthesized according to a modified general procedure A using phenyl *N*-hydroxycarbamate (0.765 g, 5.00 mmol), and *N*-isobutylamine (2.48 mL, 25.0 mmol) and Et<sub>3</sub>N (0.14 mL, 1.0 mmol) in THF (16.6 mL, 0.30 M). The vial was sealed with a microwave cap and heated for 16 h at 70 °C via an oil bath heating. The reaction mixture was concentrated under reduced pressure and isolated using flash chromatography (5% MeOH/CH<sub>2</sub>Cl<sub>2</sub> then 7% MeOH/CH<sub>2</sub>Cl<sub>2</sub>). The title compound was obtained as an amorphous white solid (0.380 g, 58%).

**TLC R<sub>f</sub>:** 0.28 in 10% MeOH/CH<sub>2</sub>Cl<sub>2</sub>.

**<sup>1</sup>H NMR (300 MHz, DMSO-*d*<sub>6</sub>):** δ 8.52 (d, *J* = 1.2 Hz, 1H), 8.21 (br s, 1H), 6.61 (t, *J* = 6.2 Hz, 1H), 2.86 (t, *J* = 6.9 Hz, 2H), 1.78-1.65 (m, 1H), 0.82 (d, *J* = 6.7 Hz, 6H).

**<sup>13</sup>C NMR (100 MHz, DMSO-*d*<sub>6</sub>):** δ 162.0 (C), 46.7 (CH<sub>2</sub>), 28.9 (CH), 20.4 (CH<sub>3</sub>).

**IR (FTIR):** 3389, 3123, 2955, 2871, 1617, 1549, 1424 cm<sup>-1</sup>.

**HRMS (EI) m/z:** Despite multiple attempts to obtain an accurate mass using both ESI and EI, one could not be obtained for this compound. However, this product was a precursor to **1g**, for which all characterization was obtained, thereby clearly demonstrating this to be the desired product.

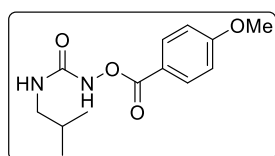

**3-((4-Methoxybenzoyl)oxy)-1-isobutylurea (**1g**):** The title compound was synthesized according to general procedure **B** using the pure 1-isobutyl-3-hydroxyurea (0.330 g, 2.50 mmol) was added CH<sub>2</sub>Cl<sub>2</sub> (0.30 M) and cooled to 0 °C. To this was added Et<sub>3</sub>N (0.35 mL, 0.40 mmol) followed

immediately by addition of p-methoxybenzoylchloride (0.427 g, 2.50 mmol). The reaction was allowed to warm to room temperature and stirred overnight. Upon completion, the reaction was extracted with NaHCO<sub>3</sub> (5.0 mL x1), and then brine (5.0 mL x1). The organic phase was collected and dried with Na<sub>2</sub>SO<sub>4</sub>. The solids were filtered over a frit and rinsed with CH<sub>2</sub>Cl<sub>2</sub> (5.0 mL). The filtrate was collected, concentrated vacuo and purified by recrystallization with Et<sub>2</sub>O to yield a white crystalline solid (0.548 g, 82%).

**TLC R<sub>f</sub>:** 0.21 in 2% MeOH/CH<sub>2</sub>Cl<sub>2</sub>.

**M.p.:** 139.7-140.5 °C.

**<sup>1</sup>H NMR (400 MHz, DMSO-*d*<sub>6</sub>):** δ 9.68-9.60 (br s, 1H), 7.98 (d, *J* = 8.9 Hz, 2H), 7.09 (d, *J* = 8.9 Hz, 2H), 7.04 (t, *J* = 6.0 Hz, 1H), 3.84 (s, 3H), 2.86 (t, *J* = 6.4 Hz, 2H), 1.80-1.63 (m, 1H), 0.81 (d, *J* = 6.7 Hz, 3H).

**<sup>13</sup>C NMR (100 MHz, DMSO-*d*<sub>6</sub>):** δ 165.5 (C), 164.1 (C), 159.3 (C), 132.2 (CH), 120.2 (C), 114.7 (CH), 56.1 (CH), 47.0 (CH<sub>2</sub>), 28.8 (CH), 20.4 (CH<sub>3</sub>).

**IR (FTIR):** 3304, 2959, 1748, 1663, 1571, 1510, 1249 cm<sup>-1</sup>.

**HRMS (ESI) m/z:** Exact mass calcd for C<sub>13</sub>H<sub>18</sub>N<sub>2</sub>O<sub>4</sub>Na [M+Na]<sup>+</sup>: 289.1165. Found: 289.1176.

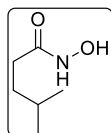

**N-Hydroxy-4-methylpentanamide (**6a**):** The title compound was synthesized according to general procedure **E** using 4-methylpentanoyl chloride (1.35 g, 10.0 mmol) and hydroxylamine hydrochloride (0.694 g, 10.0 mmol) and NaHCO<sub>3</sub> (1.85 g, 22.0 mmol) in 2 : 1 CH<sub>2</sub>Cl<sub>2</sub> : H<sub>2</sub>O (0.30 M). Upon completion, the reaction mixture was concentrated in vacuo and isolated using flash chromatography (50% EtOAc/ Hexanes) to yield the title compound as a white solid (1.13 g, 86% yield).

**<sup>1</sup>H NMR (400 MHz, CDCl<sub>3</sub>):** δ 8.28 (br s, 2H), 2.18-2.13 (m, 2H), 1.62-1.49 (m, 3H), 0.90 (d, *J* = 6.2 Hz, 6H).

**$^{13}\text{C}$  NMR (75 MHz,  $\text{CDCl}_3$ ):**  $\delta$  172.1 (C), 34.2 ( $\text{CH}_2$ ), 31.0 ( $\text{CH}_2$ ), 27.7 (CH), 22.2 ( $\text{CH}_3$ ).

The  $^1\text{H}$  NMR and  $^{13}\text{C}$  NMR is in agreement with previous reports.<sup>15</sup>

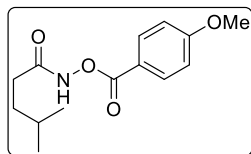

***N*-((4-Methoxybenzoyl)oxy)-4-methylpentanamide (1h):** The title compound was synthesized according to general procedure **F** using *N*-hydroxy-4-methylpentanamide (0.656 g, 5.00 mmol) and 4-methoxybenzoyl chloride (0.853 g, 5.00 mmol) and triethylamine (0.70 mL, 5.0 mmol) in  $\text{CH}_2\text{Cl}_2$  (0.30 M). Upon completion the reaction mixture was extracted with saturated

$\text{NaHCO}_3$  three times (10 mL x 3) followed by a single brine wash (10 mL x 1). The organic phase was collected and dried over  $\text{Na}_2\text{SO}_4$  (stirring for 15 min). The solids were filtered over a frit and rinsed with  $\text{CH}_2\text{Cl}_2$  (20.0 mL). The filtrate was collected, and concentrated in vacuo and isolated using flash chromatography (50% EtOAc/Hexanes) to yield the title compound as a white solid (1.12 g, 82% yield).

**TLC  $R_f$ :** 0.71 in 50% EtOAc/Hexanes.

**$^1\text{H}$  NMR (400 MHz,  $\text{CDCl}_3$ ):**  $\delta$  9.11 (br s, 1H), 8.03 (d,  $J$  = 9.0 Hz, 2H), 6.93 (d,  $J$  = 9.0 Hz, 2H), 3.85 (s, 3H), 2.30 (t,  $J$  = 7.4 Hz, 2H), 1.67-1.57 (m, 4H), 0.90 (d,  $J$  = 6.4 Hz, 6H).

**$^{13}\text{C}$  NMR (100 MHz,  $\text{CDCl}_3$ ):**  $\delta$  171.7 (C), 164.8 (C), 164.4 (C), 132.2 (CH), 118.9 (C), 114.0 (CH), 55.5 ( $\text{CH}_3$ ), 33.9 ( $\text{CH}_2$ ), 31.2 ( $\text{CH}_2$ ), 27.7 (CH), 22.2 ( $\text{CH}_3$ ).

**IR (FTIR):** 3147, 2959, 1759, 1657, 1603, 1509, 1248, 1167, 1024  $\text{cm}^{-1}$ .

**HRMS (ESI)  $m/z$ :** Exact mass calcd for  $\text{C}_{14}\text{H}_{19}\text{NO}_4\text{Na}$  [ $\text{M}+\text{Na}$ ] $^+$ : 288.1210. Found: 288.1212.

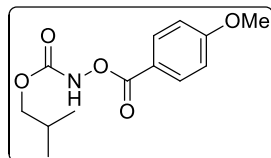

**Isobutyl (4-methoxybenzoyl)oxycarbamate (1i):** Isobutyl hydroxycarbamate was synthesized according to general procedure **A** using isobutyl chloroformate (1.30 mL, 10.0 mmol) and hydroxylamine hydrochloride (0.694 g, 10.0 mmol) and  $\text{NaHCO}_3$  (1.85 mL, 22.0 mmol) in 2 : 1  $\text{CH}_2\text{Cl}_2$  :  $\text{H}_2\text{O}$  (0.30 M). Upon completion, the reaction mixture was

concentrated in vacuo to provide the crude isobutyl hydroxycarbamate which was used in the next step without further purification.

The title compound was synthesized according to general procedure **B** using the crude isobutyl hydroxycarbamate (0.666 g, 5.00 mmol) to this was added  $\text{CH}_2\text{Cl}_2$  (0.30 M) and cooled to 0  $^\circ\text{C}$ . To this was added  $\text{Et}_3\text{N}$  (0.70 mL, 5.0 mmol) followed immediately by addition of *p*-methoxybenzoylchloride (0.853 g, 5.00 mmol). The reaction was allowed to warm to room temperature and stirred overnight. Upon completion the reaction mixture was extracted with saturated  $\text{NaHCO}_3$  three times (10 mL x 3) followed by a single brine wash (10 mL x 1). The organic phase was collected and dried over  $\text{Na}_2\text{SO}_4$  (stirring for 15 min). The solids were filtered over a frit and rinsed with  $\text{CH}_2\text{Cl}_2$  (20.0 mL). The filtrate was collected, and concentrated in vacuo and isolated using flash chromatography (15% EtOAc/Hexanes) to yield the title compound as a clear oil (1.17 g, 88% yield).

**TLC  $R_f$ :** 0.70 in 33% EtOAc/Hexanes.

**$^1\text{H}$  NMR (400 MHz,  $\text{CDCl}_3$ ):**  $\delta$  8.24 (br s, 1H), 8.04 (d,  $J$  = 9.0 Hz, 2H), 6.94 (d,  $J$  = 9.0 Hz, 2H), 3.98 (d,  $J$  = 6.6 Hz, 2H), 3.86 (s, 3H), 1.96 (dqintet,  $J$  = 13.4, 6.7 Hz, 1H), 0.92 (d,  $J$  = 6.7 Hz, 6H).

<sup>15</sup> Dube, P.; Nathel, N. F. F.; Vetelino, M.; Couturier, M.; Aboussafy, C. L.; Pichette, S.; Jorgensen, M. L.; Hardink, M. *Org. Lett.* **2009**, *11*, 5622.

**<sup>13</sup>C NMR (100 MHz, CDCl<sub>3</sub>):** δ 165.7 (C), 164.4 (C), 157.0 (C), 132.2 (CH), 118.9 (C), 114.1 (CH), 72.7 (CH<sub>2</sub>), 55.6 (CH<sub>3</sub>), 27.9 (CH), 18.9 (CH<sub>3</sub>)

**IR (FTIR):** 3147, 2960, 1759, 1656, 1603, 1509, 1459, 1248, 1167 cm<sup>-1</sup>.

**HRMS (ESI) m/z:** Exact mass calcd for C<sub>13</sub>H<sub>17</sub>NO<sub>5</sub>Na [M+Na]<sup>+</sup>: 290.1005. Found: 290.1004.

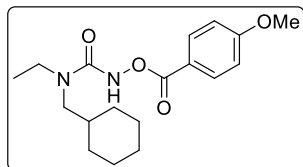

**3-((4-Methoxybenzoyl)oxy)-1-cyclohexylmethyl-1-ethylurea (1j):** The title compound was synthesized according to general procedure C using phenyl (4-methoxybenzoyl)oxycarbamate (0.861 g, 3.00 mmol), and *N*-(cyclohexylmethyl)-*N*-ethylamine (0.555 g, 3.00 mmol) and imidazole (0.020 g, 0.30 mmol) in THF (15.0 mL, 0.20 M). The reaction was heated under microwave irradiation for 2 h at 100 °C. Upon completion, the reaction mixture was diluted with EtOAc (20 mL) and washed three times using 1 M NaOH (2.0 mL x 3), followed by a single brine wash (10 mL x 1). The organic phase was collected and dried over Na<sub>2</sub>SO<sub>4</sub> (stirring for 15 min). The solids were filtered over a frit and rinsed with CH<sub>2</sub>Cl<sub>2</sub> (5.0 mL). The filtrate was collected, concentrated vacuo and isolated using silica plug (15% EtOAc/Hexanes → 50% EtOAc/Hexanes) to yield the title compound as a colourless oil (0.653 g, 54%).

**TLC R<sub>f</sub>:** 0.30 in 20% EtOAc/Hexanes.

**<sup>1</sup>H NMR (400 MHz, CDCl<sub>3</sub>):** δ 10.21-10.14 (br s, 1H), 8.00-7.91 (m, 2H), 7.14-7.05 (m, 2H), 3.85 (s, 3H), 3.25 (q, *J* = 7.0 Hz, 2H), 3.05 (d, *J* = 6.9 Hz, 2H), 1.74-1.45 (m, 6H), 1.27-1.12 (m, 3H), 1.08 (t, *J* = 7.0 Hz, 3H), 0.98-0.80 (m, 2H).

**<sup>13</sup>C NMR (100 MHz, DMSO-*d*<sub>6</sub>):** δ 165.2 (C), 163.6 (C), 157.2 (C), 131.4 (CH), 119.8 (C), 114.3 (CH), 55.6 (CH), 51.4 (CH<sub>2</sub>), 41.2 (CH<sub>2</sub>), 36.2 (CH), 30.2 (CH<sub>2</sub>), 26.1 (CH<sub>2</sub>), 25.4 (CH<sub>2</sub>), 13.0 (CH<sub>3</sub>).

**IR (FTIR):** 3251, 2923, 2850, 1741, 1660, 1604, 1248, 1164 cm<sup>-1</sup>.

**HRMS (ESI) m/z:** Exact mass calcd for C<sub>21</sub>H<sub>34</sub>N<sub>2</sub>O<sub>4</sub>Na [M+Na]<sup>+</sup>: 401.2417. Found: 401.2423.

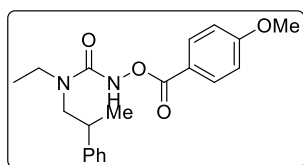

**1-Ethyl-3-((4-methoxybenzoyl)oxy)-1-(2-phenylpropyl)urea (1k):** The title compound was synthesized according to general procedure C using phenyl (4-methoxybenzoyl)oxycarbamate (0.862 g, 3.00 mmol), and *N*-ethyl-2-phenylpropan-1-amine (0.490 g, 3.00 mmol) and imidazole (0.020 g, 0.30 mmol) in THF (15.0 mL, 0.20 M). The reaction was heated under microwave irradiation for 2 h at 100 °C. Upon completion, the reaction mixture was diluted with EtOAc (20 mL) and washed three times using 1 M NaOH (2.0 mL x 3), followed by a single brine wash (10 mL x 1). The organic phase was collected and dried over Na<sub>2</sub>SO<sub>4</sub> (stirring for 15 min). The solids were filtered over a frit and rinsed with CH<sub>2</sub>Cl<sub>2</sub> (5.0 mL). The filtrate was collected, concentrated vacuo and isolated using silica plug (20% EtOAc/Hexanes → 40% EtOAc/Hexanes) to yield the title compound as a colourless oil (0.919 g, 86%).

**TLC R<sub>f</sub>:** 0.19 in 20% EtOAc/Hexanes.

**<sup>1</sup>H NMR (400 MHz, CDCl<sub>3</sub>):** δ 8.26 (br s, 1H), 8.11-7.99 (m, 2H), 7.35-7.27 (m, 2H), 7.27-7.17 (m, 3H), 6.98-6.86 (m, 2H), 3.85 (s, 3H), 3.58 (dd, *J* = 6.4, 13.6 Hz, 1H), 3.27-3.11 (m, 3H), 2.96 (qd, *J* = 7.2, 14.6 Hz, 1H), 1.35-1.27 (m, 3H), 1.18-1.03 (m, 3H).

**$^{13}\text{C}$  NMR (100 MHz,  $\text{CDCl}_3$ ):**  $\delta$  166.4 (C), 164.2 (C), 157.7 (C), 144.0 (C), 132.1 (CH), 128.8 (CH), 127.3 (CH), 126.8 (CH), 119.4 (C), 113.9 (CH), 55.5 ( $\text{CH}_3$ ), 54.6 ( $\text{CH}_2$ ), 42.6 ( $\text{CH}_2$ ), 38.8 (CH), 18.6 ( $\text{CH}_3$ ), 12.9 ( $\text{CH}_3$ ).

**IR (FTIR):** 3216, 2966, 1747, 1668, 1604, 1509, 1454, 1245, 1167  $\text{cm}^{-1}$ .

**HRMS (ESI)  $m/z$ :** Exact mass calcd for  $\text{C}_{20}\text{H}_{24}\text{N}_2\text{O}_4\text{Na}$   $[\text{M}+\text{Na}]^+$ : 379.1628. Found: 379.1634.

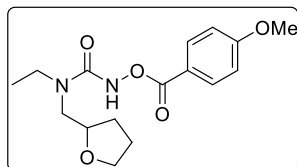

**1-Ethyl-3-((4-methoxybenzoyl)oxy)-1-((tetrahydrofuran-2-yl)methyl)urea (1l):** The title compound was synthesized according to general procedure C using phenyl (4-methoxybenzoyl)oxycarbamate (0.862 g, 3.00 mmol), and *N*-((tetrahydrofuran-2-yl)methyl)ethanamine (0.388 g, 3.00 mmol) and imidazole (0.020 g, 0.30 mmol) in THF (10.0 mL, 0.30 M). The reaction was heated under microwave irradiation for 2 h at 100 °C. Solvent was removed under reduced pressure and the crude product isolated using flash chromatography (20% EtOAc/Hexanes) to yield the title compound as a clear oil (0.580 g, 59%).

**TLC  $R_f$ :** 0.34 in 50% EtOAc/Hexanes.

**$^1\text{H}$  NMR (400 MHz,  $\text{CDCl}_3$ ):**  $\delta$  10.08 (br s, 1H), 8.05 (d,  $J$  = 9.0 Hz, 2H), 6.90 (d,  $J$  = 9.0 Hz, 2H), 4.10-4.02 (m, 2H), 3.86-3.81 (m, 4H), 3.50-3.26 (m, 4H), 2.02-1.90 (m, 3H), 1.63-1.58 (m, 1H), 1.15 (t,  $J$  = 7.1 Hz, 3H).

**$^{13}\text{C}$  NMR (100 MHz,  $\text{CDCl}_3$ ):**  $\delta$  166.2 (C), 164.0 (C), 156.0 (C), 132.1 (CH), 120.1 (C), 113.9 (CH), 79.5 (CH), 68.6 ( $\text{CH}_2$ ), 55.5 ( $\text{CH}_3$ ), 54.6 ( $\text{CH}_2$ ), 43.8 ( $\text{CH}_2$ ), 28.8 ( $\text{CH}_2$ ), 26.1 ( $\text{CH}_2$ ), 13.0 ( $\text{CH}_3$ ).

**IR (FTIR):** 3192, 2962, 1685, 1604, 1566, 1245, 1067  $\text{cm}^{-1}$ .

**HRMS (ESI)  $m/z$ :** Exact mass calcd for  $\text{C}_{16}\text{H}_{22}\text{N}_2\text{O}_5\text{Na}$   $[\text{M}+\text{Na}]^+$ : 345.1421. Found: 345.1426.

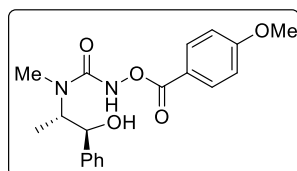

**1-(2-Hydroxy-2-phenylethyl)-3-((4-methoxybenzoyl)oxy)-1-methylurea (1m):** The title compound was synthesized according to general procedure C using phenyl (4-methoxybenzoyl)oxycarbamate (0.861 g, 3.00 mmol), and (–)-(1*R*,2*S*)-ephedrine (0.495 g, 3.00 mmol) and imidazole (0.020 g, 0.30 mmol) in THF (15.0 mL, 0.20 M). The reaction

was heated under microwave irradiation for 2 h at 100 °C. Upon completion, the reaction mixture was diluted with EtOAc (20 mL) and washed three times using 1 M NaOH (2.0 mL x 3), followed by a single brine wash (10 mL x 1). The organic phase was collected and dried over  $\text{Na}_2\text{SO}_4$  (stirring for 15 min). The solids were filtered over a frit and rinsed with  $\text{CH}_2\text{Cl}_2$  (5.0 mL). The filtrate was collected, concentrated vacuo and isolated using flash chromatography (20% EtOAc/Hexanes  $\rightarrow$  50% EtOAc/Hexanes) to yield the title compound as a colourless oil (1.16 g, 97%).

**TLC  $R_f$ :** 0.30 in 20% EtOAc/Hexanes.

**$^1\text{H}$  NMR (600 MHz,  $\text{CDCl}_3$ ):**  $\delta$  9.53-8.83 (br s, 1H), 8.10-8.01 (m, 2H), 7.43-7.25 (m, 5H), 6.98-6.89 (m, 2H), 4.84 (d,  $J$  = 3.2 Hz, 1H), 4.36 (qd,  $J$  = 6.8, 3.0 Hz, 1H), 3.86 (s, 3H), 3.62-3.01 (br s, 1H), 2.51 (s, 3H), 1.20 (d,  $J$  = 7.2 Hz, 3H).

**$^{13}\text{C}$  NMR (100 MHz,  $\text{CDCl}_3$ ):**  $\delta$  166.6 (C), 164.2 (C), 159.5 (C), 132.2 (CH), 128.5 (CH), 128.2 (CH), 128.1 (CH), 126.6 (CH), 119.6 (CH), 119.8 (C), 114.3 (CH), 77.7 (CH), 57.5 (CH), 55.6 (CH), 30.7 (CH), 13.4 ( $\text{CH}_3$ ).

**IR (FTIR):** 3251, 2923, 2850, 1741, 1660, 1604, 1248, 1164  $\text{cm}^{-1}$ .

**HRMS (ESI) m/z:** Exact mass calcd for  $\text{C}_{21}\text{H}_{34}\text{N}_2\text{O}_4\text{Na}$   $[\text{M}+\text{Na}]^+$ : 401.2417. Found: 401.2423.

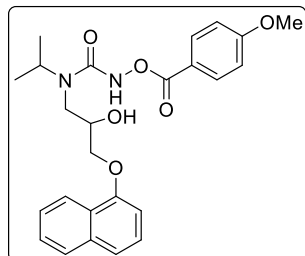

**1-(2-Hydroxy-3-(naphthalen-1-yloxy)propyl)-1-isopropyl-3-((4-methoxybenzoyl)oxy)urea (1n):** The title compound was synthesized according to general procedure C using phenyl (4-methoxybenzoyl)oxycarbamate (0.861 g, 3.00 mmol), and propranolol (0.778 g, 3.00 mmol) and imidazole (0.020 g, 0.30 mmol) in THF (12.0 mL, 0.25 M). The reaction was heated under microwave irradiation for 2 h at 100 °C. Upon completion, the reaction mixture was concentrated in vacuo and isolated using flash chromatography (40%  $\text{Et}_2\text{O}$ /Toluene) to yield the title compound as a white solid (0.855 g, 60%).

**TLC  $R_f$ :** 0.22 in 20%  $\text{Et}_2\text{O}$ /Toluene.

**$^1\text{H}$  NMR (300 MHz,  $\text{CDCl}_3$ ):**  $\delta$  9.85-9.73 (br s, 1H), 8.26-8.16 (m, 2H), 8.12-8.03 (m, 2H), 7.87-7.78 (m, 1H), 7.56-7.44 (m, 3H), 7.42-7.34 (m, 1H), 6.97-6.90 (m, 2H), 6.86-6.80 (m, 1H), 4.57-4.36 (m, 2H), 4.17 (qd,  $J = 9.5, 6.0$  Hz, 2H), 3.86 (s, 3H), 3.68 (dd,  $J = 15.8, 9.0$  Hz, 1H), 3.52 (dd,  $J = 15.7, 2.2$  Hz, 1H), 1.28 (app dd,  $J = 24.1, 6.7$  Hz, 6H).

**$^{13}\text{C}$  NMR (100 MHz,  $\text{CDCl}_3$ ):**  $\delta$  166.7 (C), 164.1 (C), 159.7 (C), 153.8 (C), 134.6 (C), 132.2 (CH), 127.8 (CH), 126.7 (CH), 125.9 (CH), 125.6 (CH), 125.5 (C), 121.6 (CH), 121.2 (CH), 119.7 (C), 114.0 (CH), 105.7 (CH), 72.4 (CH), 69.9 ( $\text{CH}_2$ ), 55.6 ( $\text{CH}_3$ ), 47.8 (CH), 45.6 ( $\text{CH}_2$ ), 21.2 (CH), 20.0 ( $\text{CH}_3$ ).

**IR (FTIR):** 3205, 2973, 1742, 1633, 1604, 1509, 1249  $\text{cm}^{-1}$ .

**HRMS (ESI) m/z:** Exact mass calcd for  $\text{C}_{25}\text{H}_{28}\text{N}_2\text{O}_6\text{Na}$   $[\text{M}+\text{Na}]^+$ : 475.1845. Found: 475.1823.

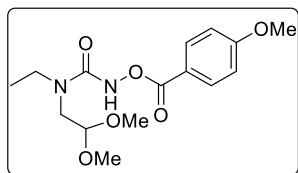

**1-(2,2-Dimethoxyethyl)-1-ethyl-3-((4-methoxybenzoyl)oxy)urea (1o):** The title compound was synthesized according to general procedure C using phenyl (4-methoxybenzoyl)oxycarbamate (0.862 g, 3.00 mmol), and *N*-ethyl-2,2-dimethoxyethanamine (0.399 g, 3.00 mmol) and imidazole (0.020 g, 0.30 mmol) in THF (10.0 mL, 0.30 M). The reaction was heated under microwave irradiation for 2 h at 100 °C. Solvent was removed under reduced pressure and the crude product isolated using flash chromatography (30%  $\text{EtOAc}$ /Hexanes  $\rightarrow$  40%  $\text{EtOAc}$ /Hexanes) to yield the title compound as a clear oil (0.979 g, 99%).

**TLC  $R_f$ :** 0.40 in 40%  $\text{EtOAc}$ /Hexanes.

**$^1\text{H}$  NMR (400 MHz,  $\text{CDCl}_3$ ):**  $\delta$  9.63 (s, 1H), 8.05 (d,  $J = 8.6$  Hz, 2H), 6.93-6.90 (m, 2H), 4.46 (t,  $J = 5.3$  Hz, 1H), 3.84 (s, 3H), 3.50 (s, 6H), 3.36-3.45 (m, 4H), 1.16 (t,  $J = 7.1$  Hz, 3H).

**$^{13}\text{C}$  NMR (100 MHz,  $\text{CDCl}_3$ ):**  $\delta$  166.3 (C), 163.9 (C), 158.6 (C), 132.0 (CH), 119.8 (C), 113.9 (CH), 104.4 (CH), 55.6 ( $\text{CH}_3$ ), 55.5 ( $\text{CH}_3$ ), 49.4 ( $\text{CH}_2$ ), 43.3 ( $\text{CH}_2$ ), 13.4 ( $\text{CH}_3$ ).

**IR (FTIR):** 3216, 2943, 1740, 1686, 1466, 1247, 1169, 1068  $\text{cm}^{-1}$ .

**HRMS (ESI) m/z:** Exact mass calcd for  $\text{C}_{15}\text{H}_{22}\text{N}_2\text{O}_6\text{Na}$   $[\text{M}+\text{Na}]^+$ : 349.1370. Found: 349.1376.

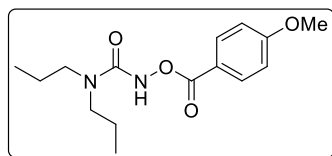

**3-((4-Methoxybenzoyl)oxy)-1,1-dipropylurea (1p):** The title compound was synthesized according to a literature procedure.<sup>13</sup>

**<sup>1</sup>H NMR (400 MHz, CDCl<sub>3</sub>):**  $\delta$  8.49 (s, 1H), 8.07-8.04 (m, 2H), 6.93-6.91 (m, 2H), 3.23 (t,  $J$  = 7.6 Hz, 4H), 1.64 (ap sext, 7.5 Hz, 4H), 0.92 (t,  $J$  = 7.4 Hz, 6H).

**<sup>13</sup>C NMR (100 MHz, CDCl<sub>3</sub>):**  $\delta$  167.0 (C), 164.3 (C), 157.8 (C), 132.2 (CH), 119.5 (C), 114.1 (CH), 55.6 (CH<sub>3</sub>), 49.1 (CH<sub>2</sub>), 21.6 (CH<sub>2</sub>), 11.4 (CH<sub>3</sub>).

The <sup>1</sup>H NMR and <sup>13</sup>C NMR is in agreement with previous reports.

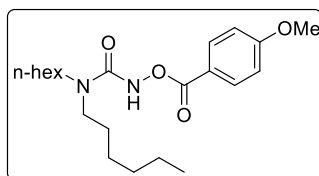

**1,1-Dihexyl-3-((4-methoxybenzoyl)oxy)urea (1q):** The title compound was synthesized according to general procedure C using phenyl (4-methoxybenzoyl)oxycarbamate (0.862 g, 3.00 mmol), and *N,N*-dihexylamine (0.555 g, 3.00 mmol) and imidazole (0.020 g, 0.30 mmol) in THF (10.0 mL, 0.30 M). The reaction was heated under microwave irradiation for 2 h at 100 °C. Upon completion, the reaction mixture was

diluted with EtOAc (20 mL) and washed three times using 1 M NaOH (2.0 mL x 3), followed by a single brine wash (10 mL x 1). The organic phase was collected and dried over Na<sub>2</sub>SO<sub>4</sub> (stirring for 15 min). The solids were filtered over a frit and rinsed with CH<sub>2</sub>Cl<sub>2</sub> (5.0 mL). The filtrate was collected, concentrated in vacuo and isolated using silica column chromatography (10% EtOAc/Hexanes → 20% EtOAc/Hexanes) to yield the title compound as a colourless oil (0.840 g, 74%).

**TLC R<sub>f</sub>:** 0.24 in 20% EtOAc/Hexanes.

**<sup>1</sup>H NMR (400 MHz, CDCl<sub>3</sub>):**  $\delta$  8.47 (br s, 1H), 8.06 (d,  $J$  = 9.0 Hz, 2H), 6.92 (d,  $J$  = 9.0 Hz, 2H), 3.85 (s, 3H), 3.24 (t,  $J$  = 7.7 Hz, 4H), 1.62-1.58 (m, 4H), 1.32-1.27 (m, 12H), 0.87 (t,  $J$  = 6.8 Hz, 6H).

**<sup>13</sup>C NMR (100 MHz, CDCl<sub>3</sub>):**  $\delta$  167.0 (C), 164.3 (C), 157.7 (C), 132.2 (CH), 119.5 (C), 114.0 (CH), 55.6 (CH<sub>3</sub>), 47.5 (CH<sub>2</sub>), 31.7 (CH<sub>2</sub>), 28.3 (CH<sub>2</sub>), 26.7 (CH<sub>2</sub>), 22.7 (CH<sub>2</sub>), 14.2 (CH<sub>3</sub>).

**IR (FTIR):** 3156, 2955, 2930, 2856, 1753, 1652, 1509, 1486, 1264 cm<sup>-1</sup>.

**HRMS (ESI) m/z:** Exact mass calcd for C<sub>21</sub>H<sub>34</sub>N<sub>2</sub>O<sub>4</sub>Na [M+Na]<sup>+</sup>: 401.2411. Found: 401.2416.

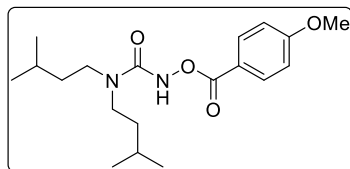

**1,1-Diisopentyl-3-((4-methoxybenzoyl)oxy)urea (1r):** The title compound was synthesized according to general procedure C using phenyl (4-methoxybenzoyl)oxycarbamate (0.862 g, 3.00 mmol), and *N,N*-diisopentylamine (0.472 g, 3.00 mmol) and imidazole (0.020 g, 0.30 mmol) in THF (10.0 mL, 0.30 M). The reaction was heated under

microwave irradiation for 2 h at 100 °C. Upon completion, the reaction mixture was diluted with EtOAc (20 mL) and washed three times using 1 M NaOH (2.0 mL x 3), followed by a single brine wash (10 mL x 1). The organic phase was collected and dried over Na<sub>2</sub>SO<sub>4</sub> (stirring for 15 min). The solids were filtered over a frit and rinsed with CH<sub>2</sub>Cl<sub>2</sub> (5.0 mL). The filtrate was collected, concentrated in vacuo



and isolated using silica column chromatography (15% EtOAc/Hexanes  $\rightarrow$  30% EtOAc/Hexanes) to yield the title compound as a colourless oil (0.800 g, 79%).

**TLC  $R_f$ :** 0.38 in 33% EtOAc/Hexanes.

**$^1\text{H}$  NMR (400 MHz,  $\text{CDCl}_3$ ):**  $\delta$  8.46 (br s, 1H), 8.06 (d,  $J = 9.0$  Hz, 2H), 6.92 (d,  $J = 9.0$  Hz, 2H), 3.85 (s, 3H), 3.26 (t,  $J = 7.9$  Hz, 4H), 1.63-1.54 (m, 2H), 1.54-1.47 (m, 4H), 0.93 (d,  $J = 6.5$  Hz, 12H).

**$^{13}\text{C}$  NMR (100 MHz,  $\text{CDCl}_3$ ):**  $\delta$  167.0 (C), 164.3 (C), 157.5 (C), 132.2 (CH), 119.5 (C), 114.1 (CH), 55.6 ( $\text{CH}_3$ ), 45.8 ( $\text{CH}_2$ ), 37.1 ( $\text{CH}_2$ ), 26.2 (CH), 22.6 ( $\text{CH}_3$ ).

**IR (FTIR):** 3263, 2953, 2868, 1745, 1655, 1604, 1510, 1249, 1166  $\text{cm}^{-1}$ .

**HRMS (ESI)  $m/z$ :** Exact mass calcd for  $\text{C}_{19}\text{H}_{30}\text{N}_2\text{O}_4\text{Na}$   $[\text{M}+\text{Na}]^+$ : 373.2098. Found: 373.2103.

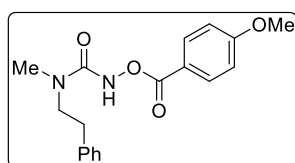

**3-((4-Methoxybenzoyl)oxy)-1-methyl-1-phenethylurea (1s):** The title compound was synthesized according to general procedure C using phenyl (4-methoxybenzoyl)oxycarbamate (0.862 g, 3.00 mmol), and *N*-methyl-2-phenylethanamine (0.406 g, 3.00 mmol) and imidazole (0.020 g, 0.30 mmol) in THF (10.0 mL, 0.30 M). The reaction was heated under microwave irradiation for 2 h at 100  $^{\circ}\text{C}$ . Solvent was removed under reduced pressure and the crude product isolated using flash chromatography (30% EtOAc/Hexanes  $\rightarrow$  40% EtOAc/Hexanes) to yield the title compound as an amorphous off-white solid (0.896 g, 91%).

**TLC  $R_f$ :** 0.22 in 33% EtOAc/Hexanes.

**$^1\text{H}$  NMR (400 MHz,  $\text{CDCl}_3$ ):**  $\delta$  8.30 (br s, 1H), 8.07 (d,  $J = 9.0$  Hz, 2H), 7.34-7.21 (m, 5H), 6.94 (d,  $J = 9.0$  Hz, 2H), 3.87 (s, 3H), 3.56 (t,  $J = 7.4$  Hz, 2H), 2.93-2.89 (m, 5H).

**$^{13}\text{C}$  NMR (100 MHz,  $\text{CDCl}_3$ ):**  $\delta$  166.6 (C), 164.3 (C), 157.9 (C), 138.7 (C), 132.2 (CH), 129.0 (CH), 128.9 (CH), 126.7 (CH), 119.4 (C), 114.0 (CH), 55.6 ( $\text{CH}_3$ ), 51.4 ( $\text{CH}_2$ ), 34.9 ( $\text{CH}_3$ ), 34.3 ( $\text{CH}_2$ ).

**IR (FTIR):** 3302, 3065, 2972, 2934, 1737, 1702, 1602, 1508, 1456  $\text{cm}^{-1}$ .

**HRMS (ESI)  $m/z$ :** Exact mass calcd for  $\text{C}_{18}\text{H}_{20}\text{N}_2\text{O}_4\text{Na}$   $[\text{M}+\text{Na}]^+$ : 351.1315. Found: 351.1321.

**3-((4-Methoxybenzoyl)oxy)-1-butyl-1-methylurea (1t):** The title compound was synthesized according to general procedure C using phenyl (4-methoxybenzoyl)oxycarbamate (0.861 g, 3.00 mmol), and *N*-methylbutylamine (0.262 g, 3.00 mmol) and imidazole (0.020 g, 0.30 mmol) in THF (15.0 mL, 0.20 M). The reaction was heated under microwave irradiation for 2 h at 100  $^{\circ}\text{C}$ . Upon completion, the reaction mixture was diluted with EtOAc (20 mL) and washed three times using 1 M NaOH (2.0 mL x 3), followed by a single brine wash (10 mL x 1). The organic phase was collected and dried over  $\text{Na}_2\text{SO}_4$  (stirring for 15 min). The solids were filtered over a frit and rinsed with  $\text{CH}_2\text{Cl}_2$  (5.0 mL). The filtrate was collected, concentrated in vacuo and isolated using flash chromatography (25% EtOAc/Hexanes) to yield the title compound as a yellow oil (0.466 g, 55%).

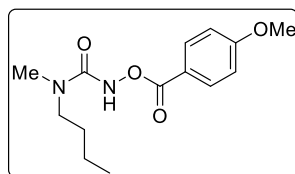

**TLC  $R_f$ :** 0.16 in 20% EtOAc/Hexanes.

**$^1\text{H}$  NMR (400 MHz,  $\text{CDCl}_3$ ):**  $\delta$  8.45-8.42 (br s, 1H), 8.12-8.06 (m, 2H), 6.98-6.92 (m, 2H), 3.88 (s, 3H), 3.37-3.30 (m, 2H), 3.00 (s, 3H), 1.66-1.54 (m, 2H), 1.43-1.30 (m, 2H), 0.93 (t,  $J = 7.2$  Hz, 3H).

**<sup>13</sup>C NMR (100 MHz, CDCl<sub>3</sub>):** δ 166.6 (C), 164.1 (C), 157.8 (C), 132.0 (CH), 119.3 (C), 113.9 (CH), 55.4 (CH), 48.8 (CH<sub>2</sub>), 33.9 (CH<sub>3</sub>), 29.7 (CH<sub>2</sub>), 19.9 (CH<sub>2</sub>), 13.8 (CH<sub>3</sub>).

**IR (FTIR):** 3213, 2956, 2870, 1752, 1649, 1503, 1244, 1074 cm<sup>-1</sup>.

**HRMS (ESI) m/z:** Exact mass calcd for C<sub>14</sub>H<sub>20</sub>N<sub>2</sub>O<sub>4</sub>Na [M+Na]<sup>+</sup>: 303.1321. Found: 303.1298.

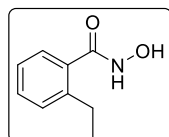

**2-Ethyl-*N*-hydroxybenzamide (6b):** The title compound was synthesized according to a literature procedure.<sup>14</sup>

**<sup>1</sup>H NMR (300 MHz, CDCl<sub>3</sub>):** δ 8.87-8.09 (br s, 2H), 7.47-7.38 (m, 1H), 7.38-7.29 (m, 2H), 7.26-7.19 (m, 1H), 2.81 (q, *J* = 7.4 Hz, 2H), 1.24 (t, *J* = 7.5 Hz, 3H).

**<sup>13</sup>C NMR (75 MHz, CDCl<sub>3</sub>):** δ 168.8 (C), 143.3 (C), 131.3 (C), 131.0 (CH), 129.6 (CH), 127.3 (CH), 125.8 (CH), 26.2 (CH<sub>2</sub>), 15.7 (CH<sub>3</sub>).

The <sup>1</sup>H NMR and <sup>13</sup>C NMR is in agreement with previous reports.

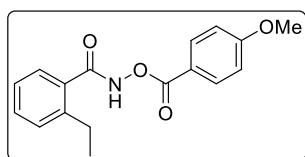

**2-Ethyl-*N*-((4-methoxybenzoyl)oxy)benzamide (1u):** The title compound was synthesized according to the general procedure F using 2-ethyl-*N*-hydroxybenzamide (0.520 g, 3.15 mmol), CH<sub>2</sub>Cl<sub>2</sub> (0.30 M) at 0 °C. To this was added Et<sub>3</sub>N (0.42 mL, 3.0 mmol) followed immediately by portionwise addition of *p*-methoxybenzoylchloride (0.516 g, 3.00 mmol).

The reaction was allowed to warm to room temperature and stirred overnight. Upon completion, the reaction was extracted with NaHCO<sub>3</sub> (5.0 mL x2), and then brine (5.0 mL x1). The organic phase was collected and dried with Na<sub>2</sub>SO<sub>4</sub>. The solids were filtered over a cotton plug, and the filtrate was evaporated under reduced pressure and the crude product isolated using flash column chromatography (20 % EtOAc/Hexanes) to yield the title compound as an amorphous white solid (0.592 g, 67%).

**TLC R<sub>f</sub>:** 0.21 in 20% EtOAc/Hexanes.

**<sup>1</sup>H NMR (300 MHz, CDCl<sub>3</sub>):** δ 9.36-9.27 (br s, 1H), 8.15-8.07 (m, 2H), 7.55 (dd, *J* = 7.6, 1.2 Hz, 1H), 7.48-7.42 (m, 1H), 7.36-7.30 (m, 1H), 7.29-7.22 (m, 1H), 7.00-6.94 (m, 2H), 3.90 (s, 3H), 2.87 (q, *J* = 7.5 Hz, 2H), 1.28 (t, *J* = 7.5 Hz, 3H).

**<sup>13</sup>C NMR (100 MHz, CDCl<sub>3</sub>):** δ 164.9 (C), 164.5 (C), 143.9 (C), 132.3 (CH), 131.4 (CH), 131.3 (C), 127.7 (CH), 125.8 (CH), 118.6 (CH), 114.1 (CH), 55.6 (CH), 26.3 (CH<sub>2</sub>), 16.0 (CH<sub>3</sub>).

**IR (FTIR):** 3138, 2957, 1751, 1653, 1505, 1252 cm<sup>-1</sup>.

**HRMS (ESI) m/z:** Exact mass calcd for C<sub>17</sub>H<sub>17</sub>NO<sub>4</sub>Na [M+Na]<sup>+</sup>: 322.1056. Found: 322.1056.

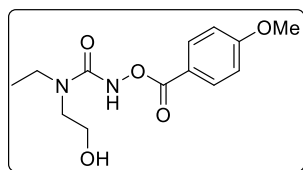

**1-Ethyl-1-(2-hydroxyethyl)-3-((4-methoxybenzoyl)oxy)urea (1v):** The title compound was synthesized according to general procedure C using phenyl (4-methoxybenzoyl)oxycarbamate (0.862 g, 3.00 mmol), and 2-(ethylamino)ethanol (0.267 g, 3.00 mmol) and imidazole (0.020 g, 0.30 mmol) in THF (10.0 mL, 0.30 M). The reaction was heated under microwave irradiation for 2 h at 100 °C. Upon completion, the reaction mixture was concentrated in vacuo and isolated using silica column chromatography (50% EtOAc/Hexanes → 40% EtOAc/DCM) to yield the title compound as a white solid (0.788 g, 93%).

**TLC R<sub>f</sub>:** 0.20 in 40% EtOAc/DCM.

**<sup>1</sup>H NMR (400 MHz, CDCl<sub>3</sub>):** δ 9.55 (br s, 1H), 8.04 (d, *J* = 9.0 Hz, 2H), 6.91 (d, *J* = 9.0 Hz, 2H), 3.84 (s, 3H), 3.81 (t, *J* = 4.8 Hz, 2H), 3.45 (t, *J* = 4.8 Hz, 2H), 3.37 (q, *J* = 7.1 Hz, 2H), 3.14 (br s, 1H), 1.16 (t, *J* = 7.1 Hz, 3H).

**<sup>13</sup>C NMR (100 MHz, CDCl<sub>3</sub>):** δ 166.7 (C), 164.1 (C), 159.1 (C), 132.1 (CH), 119.6 (C), 113.9 (CH), 62.2 (CH<sub>2</sub>), 55.6 (CH<sub>3</sub>), 48.8 (CH<sub>2</sub>), 42.7 (CH<sub>2</sub>), 13.2 (CH<sub>3</sub>).

**IR (FTIR):** 3404, 3181, 2864, 1720, 1678, 1600, 1514, 1475, 1325, 1262, 1246, 1172 cm<sup>-1</sup>.

**HRMS (ESI) m/z:** Exact mass calcd for C<sub>13</sub>H<sub>18</sub>N<sub>2</sub>O<sub>5</sub>Na [M+Na]<sup>+</sup>: 305.1108. Found: 305.1113.

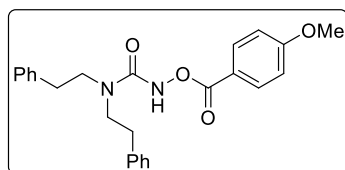

**3-((4-Methoxybenzoyl)oxy)-1,1-diphenethylurea (1w):** The title compound was synthesized according to general procedure C using phenyl (4-methoxybenzoyl)oxycarbamate (0.862 g, 3.00 mmol), and *N,N*-diphenethylamine (0.676 g, 3.00 mmol) and imidazole (0.020 g, 0.30 mmol) in THF (10.0 mL, 0.30 M). The reaction was heated under

microwave irradiation for 2 h at 100 °C. Upon completion, the reaction mixture was concentrated in vacuo and isolated using silica column chromatography (20% EtOAc/Hexanes) to yield the title compound as a white solid (0.880 g, 70%).

**TLC R<sub>f</sub>:** 0.31 in 20% EtOAc/Hexanes.

**<sup>1</sup>H NMR (400 MHz, CDCl<sub>3</sub>):** δ 8.21 (br s, 1H), 8.09-8.06 (m, 2H), 7.35-7.19 (m, 10H), 6.96-6.93 (m, 2H), 3.87 (s, 3H), 3.43 (t, *J* = 7.5 Hz, 4H), 2.89 (t, *J* = 7.4 Hz, 4H).

**<sup>13</sup>C NMR (100 MHz, CDCl<sub>3</sub>):** δ 166.5 (C), 164.3 (C), 157.7 (C), 138.7 (C), 132.2 (CH), 128.93 (CH), 128.90 (CH), 126.8 (CH), 119.4 (C), 114.1 (CH), 55.6 (CH<sub>3</sub>), 50.1 (CH<sub>2</sub>), 34.7 (CH<sub>2</sub>).

**IR (FTIR):** 3209, 2931, 1744, 1673, 1604, 1475, 1247, 1166 cm<sup>-1</sup>.

**HRMS (ESI) m/z:** Exact mass calcd for C<sub>25</sub>H<sub>26</sub>N<sub>2</sub>O<sub>4</sub>Na [M+Na]<sup>+</sup>: 441.1785. Found: 441.1790.

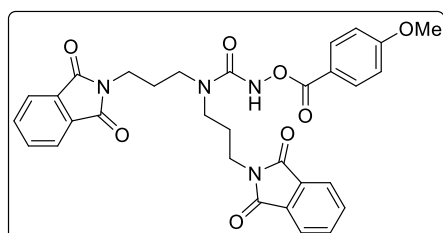

**1,1-Bis(3-(1,3-dioxisoindolin-2-yl)propyl)-3-((4-methoxybenzoyl)oxy)urea (1x):** The title compound was synthesized according to general procedure C using phenyl (4-methoxybenzoyl)oxycarbamate (0.862 g, 3.00 mmol), and *N,N*-diphenethylamine (1.17 g, 3.00 mmol) and imidazole (0.020 g, 0.30 mmol) in THF (10.0 mL, 0.30 M). The reaction

was heated under microwave irradiation for 2 h at 100 °C. Upon completion, the reaction mixture was concentrated in vacuo and isolated using silica column chromatography (gradient: 50% EtOAc/Hexanes → 100% EtOAc) to yield the title compound as a white foam (1.45 g, 83%).

**TLC R<sub>f</sub>**: 0.75 in 100% EtOAc.

**<sup>1</sup>H NMR (400 MHz, CDCl<sub>3</sub>)**: δ 8.95 (br s, 1H), 8.04 (d, *J* = 9.0 Hz, 2H), 7.84-7.78 (m, 4H), 7.73-7.67 (m, 4H), 6.92 (d, *J* = 9.0 Hz, 2H), 3.85 (s, 3H), 3.76 (t, *J* = 6.8 Hz, 4H), 3.42 (t, *J* = 7.3 Hz, 4H), 2.02 (quintet, *J* = 7.1 Hz, 4H).

**<sup>13</sup>C NMR (100 MHz, CDCl<sub>3</sub>)**: δ 168.4 (C), 166.5 (C), 164.1 (C), 157.9 (C), 134.0 (CH), 132.0 (CH), 123.3 (CH), 119.3 (C), 113.9 (CH), 55.5 (CH), 44.8 (CH<sub>2</sub>), 35.5 (CH<sub>2</sub>), 27.4 (CH<sub>2</sub>).

**IR (FTIR)**: 2939, 1694, 1604, 1389, 1244, 1167, 1025 cm<sup>-1</sup>.

**HRMS (ESI) m/z**: Exact mass calcd for C<sub>31</sub>H<sub>28</sub>N<sub>4</sub>O<sub>8</sub>Na [M+Na]<sup>+</sup>: 607.1805. Found: 607.1791.

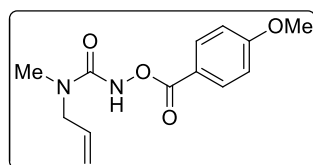

**1-Allyl-3-((4-methoxybenzoyl)oxy)-1-methylurea (1y)**: The title compound was synthesized according to general procedure C using phenyl (4-methoxybenzoyl)oxycarbamate (0.511 g, 1.78 mmol), and *N*-methylallylamine (0.17 mL, 1.78 mmol) and imidazole (0.012 g, 0.18 mmol) in THF (9.0 mL, 0.20 M). The reaction was heated under

microwave irradiation for 2 h at 100 °C. Upon completion, the reaction mixture was diluted with EtOAc (20 mL) and washed three times using 1 M NaOH (2.0 mL x 3), followed by a single brine wash (10 mL x 1). The organic phase was collected and dried over Na<sub>2</sub>SO<sub>4</sub> (stirring for 15 min). The solids were filtered over a frit and rinsed with CH<sub>2</sub>Cl<sub>2</sub> (5.0 mL). The filtrate was collected, concentrated in vacuo and isolated using silica plug (20% EtOAc/Hexanes) to yield the title compound as a colourless oil (0.376 g, 80%).

**TLC R<sub>f</sub>**: 0.11 in 20% EtOAc/Hexanes.

**<sup>1</sup>H NMR (400 MHz, CDCl<sub>3</sub>)**: δ 8.46-8.43 (br s, 1H), 8.11-8.05 (m, 2H), 6.99-6.93 (m, 2H), 5.93-5.78 (m, 1H), 5.35-5.26 (m, 2H), 3.97 (dt, *J* = 5.3, 1.6 Hz, 2H), 3.88 (s, 3H), 3.01 (s, 3H).

**<sup>13</sup>C NMR (100 MHz, CDCl<sub>3</sub>)**: δ 166.6 (C), 164.2 (C), 157.0 (C), 132.3 (CH), 132.1 (CH), 119.3 (C), 117.5 (CH<sub>2</sub>), 114.0 (CH), 55.5 (CH), 51.3 (CH<sub>2</sub>), 34.2 (CH).

**IR (FTIR)**: 3184, 3010, 1744, 1651, 1506, 1238 cm<sup>-1</sup>.

**HRMS (ESI) m/z**: Exact mass calcd for C<sub>13</sub>H<sub>16</sub>N<sub>2</sub>O<sub>4</sub>Na [M+Na]<sup>+</sup>: 287.1008. Found: 287.1014.

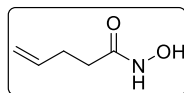

***N*-Hydroxypent-4-enamide (6c)**: The title compound was synthesized according to a literature procedure.<sup>16</sup>

**<sup>1</sup>H NMR (300 MHz, DMSO-*d*<sub>6</sub>)**: δ 10.46-10.25 (br s, 1H), 8.78-8.57 (br s, 1H), 5.78 (ddt, *J* = 17.0, 10.4, 6.4 Hz, 1H), 5.08-4.91 (m, 2H), 2.29-2.17 (m, 2H), 2.08-1.97 (m, 2H).

**<sup>13</sup>C NMR (100 MHz, DMSO-*d*<sub>6</sub>)**: δ 168.4 (C), 137.5 (CH), 115.2 (CH<sub>2</sub>), 31.5 (CH<sub>2</sub>), 29.0 (CH<sub>2</sub>).

<sup>16</sup> Hong, S. Y.; Chang, S. *J. Am. Chem. Soc.* **2019**, 141, 10399.

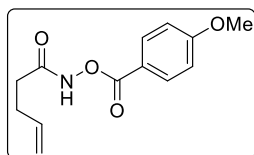

***N*-((4-Methoxybenzoyl)oxy)pent-4-enamide (1z):** The title compound was synthesized according to general procedure C using *N*-hydroxypent-4-enamide (1.15 g, 10.0 mmol), and *p*-methoxybenzoyl chloride (1.71 g, 10.0 mmol), and Et<sub>3</sub>N (1.39 mL, 10.0 mmol) in CH<sub>2</sub>Cl<sub>2</sub> (0.30 M) at 0 °C to rt. Upon completion the reaction was extracted three times using sat. NaHCO<sub>3</sub> (10.0 mL x 3), followed by a single brine wash (10 mL x 1). The organic phase was collected and dried over Na<sub>2</sub>SO<sub>4</sub> (stirring for 15 min). The solids were filtered over a frit and rinsed with CH<sub>2</sub>Cl<sub>2</sub> (50.0 mL). The filtrate was collected, concentrated in vacuo to yield the title compound as a white solid (2.49 g, 99%).

**TLC R<sub>f</sub>:** 0.27 in 33% EtOAc/Hexanes.

**<sup>1</sup>H NMR (400 MHz, CDCl<sub>3</sub>):** δ 8.04 (d, *J* = 9.0 Hz, 2H), 6.93 (d, *J* = 8.9 Hz, 2H), 5.85 (ddt, *J* = 17.0, 10.4, 6.5 Hz, 1H), 5.13-5.03 (m, 2H), 3.87 (s, 3H), 2.48-2.41 (m, 4H).

**<sup>13</sup>C NMR (100 MHz, CDCl<sub>3</sub>):** δ 164.7 (C), 164.4 (C), 136.4 (CH), 132.2 (CH), 131.7 (CH), 118.7 (C), 116.1 (CH<sub>2</sub>), 114.1 (C), 55.6 (CH<sub>3</sub>), 32.4 (CH<sub>2</sub>), 28.9 (CH<sub>2</sub>).

**IR (FTIR):** 3186, 2971, 2840, 1759, 1663, 1604, 1506, 1419, 1248, 1168 cm<sup>-1</sup>.

**HRMS (ESI) m/z:** Exact mass calcd for C<sub>13</sub>H<sub>15</sub>NO<sub>4</sub>Na [M+Na]<sup>+</sup>: 272.0897. Found: 272.0899.

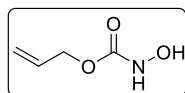

**Allylhydroxycarbamate (6d):** The title compound was synthesized according to a literature procedure.<sup>17</sup>

**TLC R<sub>f</sub>:** 0.27 in 2% MeOH/CH<sub>2</sub>Cl<sub>2</sub>.

**<sup>1</sup>H NMR (300 MHz, DMSO-*d*<sub>6</sub>):** δ 9.69-9.57 (br s, 1H), 8.73-8.70 (br s, 1H), 5.95-5.85 (m, 1H), 5.31-5.16 (m, 2H), 4.50 (dt, *J* = 5.3, 1.5 Hz, 2H).

**<sup>13</sup>C NMR (100 MHz, CDCl<sub>3</sub>):** δ 157.5 (C), 133.5 (CH), 117.2 (CH<sub>2</sub>), 64.4 (CH<sub>2</sub>).

**IR (FTIR):** 3272, 2947, 1699, 1456, 1260, 1110 cm<sup>-1</sup>.

**HRMS (ESI) m/z:** Despite multiple attempts to obtain an accurate mass using both ESI and EI, one could not be obtained for this compound. However, this product was a precursor to **1ae**, for which all characterization was obtained, thereby clearly demonstrating this to be the desired product.

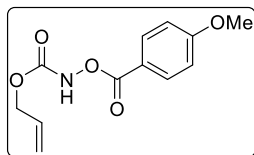

**Allyl (4-methoxybenzoyl)oxycarbamate (1aa):** The title compound was synthesized according to general procedure C using allyl hydroxycarbamate (1.17 g, 10.0 mmol), and *p*-methoxybenzoyl chloride (1.71 g, 10.0 mmol), and Et<sub>3</sub>N (1.39 mL, 10.0 mmol) in CH<sub>2</sub>Cl<sub>2</sub> (0.30 M) at 0 °C to rt. Upon completion the reaction was extracted three times using sat. NaHCO<sub>3</sub> (10.0 mL x 3), followed by a single brine wash (10 mL x 1). The organic phase was collected and dried over Na<sub>2</sub>SO<sub>4</sub> (stirring for 15 min). The solids were filtered over a frit and rinsed with CH<sub>2</sub>Cl<sub>2</sub> (50.0 mL). The filtrate was collected, concentrated in vacuo and isolated using silica gel column chromatography (solvent system) to yield the title compound as a white solid (2.20 g, 88%).

**TLC R<sub>f</sub>:** 0.54 in 33% EtOAc/Hexanes.

<sup>17</sup> Donohoe, T. J.; Chughtai, M. J.; Klauber, D. J.; Griffin, D.; Campbell, A. D. *J. Am. Chem. Soc.* **2006**, *128*, 2514.

**<sup>1</sup>H NMR (400 MHz, CDCl<sub>3</sub>):** δ 8.36 (s, 1H), 8.06-7.98 (m, *J* = 9.0 Hz, 2H), 6.97-6.88 (m, *J* = 9.0 Hz, 2H), 5.97-5.85 (m, 1H), 5.37-5.19 (m, 2H), 4.68 (td, *J* = 1.4, 5.7 Hz, 2H), 3.85 (s, 3H).

**<sup>13</sup>C NMR (100 MHz, CDCl<sub>3</sub>):** δ 165.5 (C), 164.4 (C), 156.4 (C), 132.1 (CH), 131.4 (CH), 118.9 (CH<sub>2</sub>), 118.8 (C), 114.0 (CH), 67.1 (CH<sub>2</sub>), 55.5 (CH).

**IR (FTIR):** 3199, 2953, 2844, 1754, 1718, 1602, 1492, 1238 cm<sup>-1</sup>.

**HRMS (ESI) m/z:** Exact mass calcd for C<sub>12</sub>H<sub>13</sub>NO<sub>5</sub>Na [M+Na]<sup>+</sup>: 274.0696. Found: 274.0691.

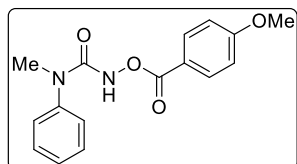

**3-((4-Methoxybenzoyl)oxy)-1-methyl-1-phenylurea (1ab):** The title compound was synthesized according to general procedure C using phenyl (4-methoxybenzoyl)oxycarbamate (0.862 g, 3.00 mmol), and *N*-methyl aniline (0.325 mL, 3.00 mmol) and imidazole (0.020 g, 0.30 mmol) in THF (10.0 mL, 0.30 M). The reaction was heated under microwave irradiation

for 2 h at 100 °C. Solvent was removed under reduced pressure and the crude product isolated using flash chromatography (30% EtOAc/hexanes) to yield the title compound as an amorphous off-white solid (0.896 g, 91%).

**TLC R<sub>f</sub>:** 0.22 in 33% EtOAc/Hexanes.

**<sup>1</sup>H NMR (400 MHz, CDCl<sub>3</sub>):** δ 8.07 (br s, 1H), 8.03-7.99 (m, 2H), 7.49-7.36 (m, 5H), 6.92 (d, *J* = 9.0 Hz, 2H), 3.85 (s, 3H), 3.32 (s, 3H).

**<sup>13</sup>C NMR (100 MHz, CDCl<sub>3</sub>):** δ 166.6 (C), 164.3 (C), 157.2 (C), 141.5 (C), 132.2 (CH), 130.4 (CH), 128.5 (CH), 127.2, (CH), 119.4 (C), 114.0 (CH), 55.6 (CH<sub>3</sub>), 38.0 (CH<sub>3</sub>).

**IR (FTIR):** 3307, 2936, 1693, 1596, 1453, 1249 cm<sup>-1</sup>.

**HRMS (ESI) m/z:** Exact mass calcd for C<sub>16</sub>H<sub>16</sub>N<sub>2</sub>O<sub>4</sub>Na [M+Na]<sup>+</sup> 323.1011. Found: 323.1108.

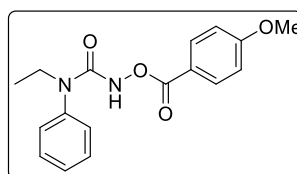

**3-((4-Methoxybenzoyl)oxy)-1-ethyl-1-phenylurea (1ac):** The title compound was synthesized according general procedure D using *N*-ethylaniline (1.26 mL, 10.0 mmol), toluene (0.8 M), KOH pellets (0.561 g, 10.0 mmol), and water (2.9 M) at 0 °C. A dripping funnel was affixed on top of the roundbottom flask and this apparatus was purged with argon for

10 minutes. Phosgene (15% in toluene) (16.4 mL, 23.0 mmol) was added to the dripping funnel under inert atmosphere, and was allowed to drip over 1 hour at 0 °C while stirring vigorously. The reaction was allowed to stir for an additional 30 minutes after complete addition of phosgene solution. Upon completion, the crude reaction mixture was bubbled with an argon balloon for 20 minutes in a well ventilated fumehood, to release any excess phosgene gas. The crude reaction mixture was then extracted to remove the aqueous layer, and then the organic phase was washed with brine (5.0 mL x1). The organic phase was collected and dried with Na<sub>2</sub>SO<sub>4</sub>. The solids were filtered over a cotton plug, and the filtrate was evaporated under reduced pressure to provide the crude *N*-ethylanilinecarbonyl chloride which was used in the next step without further purification.

To the crude *N*-ethylanilinecarbonyl chloride was added CH<sub>2</sub>Cl<sub>2</sub> (0.30 M) and cooled to 0 °C. To this was added hydroxylamine hydrochloride (0.695 g, 10.0 mmol), and followed immediately by Et<sub>3</sub>N (2.79 mL, 20.0 mmol). The reaction was allowed to warm to room temperature and stir overnight. Upon completion, the reaction was extracted with NaHCO<sub>3</sub> (10 mL x1), and then brine (10 mL x1). The organic phase was collected and dried with Na<sub>2</sub>SO<sub>4</sub>. The solids were filtered over a cotton plug, and the filtrate was evaporated under reduced pressure to provide the crude *N*-ethylanilinehydroxyurea, which could be used in the next step without further purification.

To the crude *N*-ethylanilinehydroxyurea (1.53 g, 8.53 mmol) was added CH<sub>2</sub>Cl<sub>2</sub> (0.30 M) and cooled to 0 °C. To this was added Et<sub>3</sub>N (1.19 mL, 8.53 mmol) followed immediately by dropwise addition of *p*-methoxybenzoylchloride (1.45 g, 8.53 mmol). The reaction was allowed to warm to room temperature and stirred overnight. Upon completion, the reaction was extracted with NaHCO<sub>3</sub> (10 mL x1), and then brine (10 mL x1). The organic phase was collected and dried with Na<sub>2</sub>SO<sub>4</sub>. The solids were filtered over a cotton plug, and the filtrate was evaporated under reduced pressure to provide the crude 3-((4-methoxybenzoyl)oxy)-1-ethyl-1-phenylurea which was purified by flash column chromatography (10 % Et<sub>2</sub>O/Toluene) to yield a colourless oil (1.93 g, 62% over 3 steps).

**TLC R<sub>f</sub>:** 0.23 in 20% EtOAc/Hexanes.

**<sup>1</sup>H NMR (400 MHz, CDCl<sub>3</sub>):** δ 8.05-8.00 (m, 2H), 7.97-7.95 (br s, 1H), 7.53-7.46 (m, 2H), 7.44-7.37 (m, 3H), 6.96-6.90 (m, 2H), 3.86 (s, 3H), 3.77 (q, *J* = 7.2 Hz, 2H), 1.17 (t, *J* = 7.2 Hz, 3H).

**<sup>13</sup>C NMR (100 MHz, CDCl<sub>3</sub>):** δ 166.4 (C), 164.1 (C), 156.6 (C), 138.5 (C), 132.0 (CH), 130.2 (CH), 128.4 (CH), 119.2 (C), 113.9 (CH), 55.5 (CH), 45.0 (CH<sub>2</sub>), 13.3 (CH<sub>3</sub>).

**IR (FTIR):** 3302, 2972, 1737, 1701, 1602, 1508, 1646, 1168 cm<sup>-1</sup>.

**HRMS (ESI) m/z:** Exact mass calcd for C<sub>17</sub>H<sub>18</sub>N<sub>2</sub>O<sub>4</sub>Na [M+Na]<sup>+</sup>: 337.1165. Found: 337.1194.

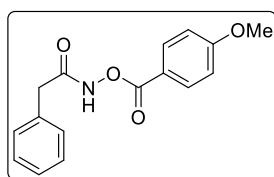

***N*-((4-Methoxybenzoyl)oxy)-2-phenylacetamide (1ad):** *N*-hydroxy-2-phenylacetamide was synthesized according to general procedure **A** using phenylacetyl chloride (1.55 g, 10.0 mmol) and hydroxylamine hydrochloride (0.695 g, 10.0 mmol) and NaHCO<sub>3</sub> (1.85 g, 22.0 mmol) in 2 : 1 CH<sub>2</sub>Cl<sub>2</sub> : H<sub>2</sub>O (0.30 M). The reaction allowed to stir at room temperature overnight; the

following day a substantial amount of white solid had precipitated out of solution. The white solid was collected over a fritted funnel and used directly in the subsequent step without further purification.

The title compound was synthesized using the general procedure **B** using the crude hydroxamic acid was dissolved in CH<sub>2</sub>Cl<sub>2</sub> (0.30 M, sparingly soluble). To the crude solution of phenylacetyl hydroxamic acid was added 4-methoxybenzoyl chloride (1.71 g, 10.0 mmol) and triethylamine (1.39 mL, 10.0 mmol). Upon completion the reaction mixture was extracted with saturated NaHCO<sub>3</sub> three times (10 mL x 3) followed by a single brine wash (10 mL x 1). The organic phase was collected and dried over Na<sub>2</sub>SO<sub>4</sub> (stirring for 15 min). The solids were filtered over a frit and rinsed with CH<sub>2</sub>Cl<sub>2</sub> (20 mL). The filtrate was collected, and concentrated in vacuo and isolated using flash chromatography (50% EtOAc/Hexanes) to yield the title compound as a white solid (2.51 g, 88% yield over two steps).

**TLC R<sub>f</sub>:** 0.57 in 50% EtOAc/Hexanes.

**<sup>1</sup>H NMR (400 MHz, CDCl<sub>3</sub>):** δ 8.94 (br s, 1H), 8.04-8.01 (m, 2H), 7.41-7.31 (m, 5H), 6.94 (d, *J* = 9.0 Hz, 2H), 3.87 (s, 3H), 3.73 (s, 2H).

**<sup>13</sup>C NMR (100 MHz, CDCl<sub>3</sub>):** δ 168.7 (C), 164.7 (C), 164.6 (C), 133.2 (C), 132.3 (CH), 129.5 (CH), 129.2 (CH), 127.8 (CH), 118.7 (C), 114.2 (CH), 55.7 (CH), 41.9 (CH<sub>2</sub>)

**IR (FTIR):** 3162, 2963, 1753, 1669, 1600, 1501, 12050, 1025 cm<sup>-1</sup>.

**HRMS (ESI) m/z:** Exact mass calcd for C<sub>16</sub>H<sub>15</sub>NO<sub>4</sub>Na [M+Na]<sup>+</sup>: 308.0899. Found: 308.0897.

**1-Ethyl-3-((4-methoxybenzoyl)oxy)-1-(3-methoxyphenyl)urea (1ae):** The title compound was synthesized according general procedure **D** using *N*-ethyl-3-methoxyaniline (1.51 g, 10.0 mmol),

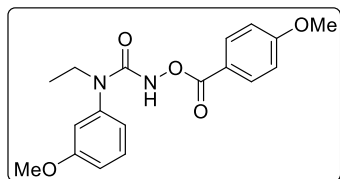

toluene (0.8 M), KOH pellets (0.561 g, 10.0 mmol), and water (2.9 M) at 0 °C. A dripping funnel was affixed on top of the roundbottom flask and this apparatus was purged with argon for 10 minutes. Phosgene (15% in toluene) (16.4 mL, 23.0 mmol) was added to the dripping funnel under inert atmosphere, and was allowed to drip over 1 hour at 0 °C while stirring vigorously. The reaction was allowed to stir for an

additional 30 minutes after complete addition of phosgene solution. Upon completion, the crude reaction mixture was bubbled with an argon balloon for 20 minutes in a well ventilated fumehood, to release any excess phosgene gas. The crude reaction mixture was then extracted to remove the aqueous layer, and then the organic phase was washed with brine (5.0 mL x1). The organic phase was collected and dried with Na<sub>2</sub>SO<sub>4</sub>. The solids were filtered over a cotton plug, and the filtrate was evaporated under reduced pressure to provide the crude *N*-ethyl(3-methoxyphenyl)carbamic chloride which was used in the next step without further purification.

To the crude ethyl(3-methoxyphenyl)carbamic chloride was added CH<sub>2</sub>Cl<sub>2</sub> (0.30 M) and cooled to 0 °C. To this was added hydroxylamine hydrochloride (0.695 g, 10.0 mmol), and followed immediately by Et<sub>3</sub>N (2.79 mL, 20.0 mmol). The reaction was allowed to warm to room temperature and stir overnight. Upon completion, the reaction was extracted with NaHCO<sub>3</sub> (10 mL x1), and then brine (10 mL x1). The organic phase was collected and dried with Na<sub>2</sub>SO<sub>4</sub>. The solids were filtered over a cotton plug, and the filtrate was evaporated under reduced pressure to provide the crude 1-ethyl-3-hydroxy-1-(3-methoxyphenyl)urea, which could be used in the next step without further purification.

To the crude 1-ethyl-3-hydroxy-1-(3-methoxyphenyl)urea was added CH<sub>2</sub>Cl<sub>2</sub> (0.30 M) and cooled to 0 °C. To this was added Et<sub>3</sub>N (1.39 mL, 10.0 mmol) followed immediately by addition of *p*-methoxybenzoylchloride (1.70 g, 10.0 mmol). The reaction was allowed to warm to room temperature and stirred overnight. Upon completion, the reaction was extracted with NaHCO<sub>3</sub> (10 mL x1), and then brine (10 mL x1). The organic phase was collected and dried with Na<sub>2</sub>SO<sub>4</sub>. The solids were filtered over a cotton plug, and the filtrate was evaporated under reduced pressure to provide the crude 1-ethyl-3-((4-methoxybenzoyl)oxy)-1-(3-methoxyphenyl)urea which was purified by flash column chromatography (20 % EtOAc/Hexanes) to yield a light pink solid (2.60 g, 76% over 3 steps).

**TLC R<sub>f</sub>:** 0.15 in 20% EtOAc/Hexanes.

**<sup>1</sup>H NMR (400 MHz, CDCl<sub>3</sub>):** δ 8.03 (br s, 1H), 8.00 (d, *J* = 8.6 Hz, 2H), 7.36 (t, *J* = 8.0 Hz, 1H), 6.97-6.89 (m, 5H), 3.84 (s, 3H), 3.82 (s, 3H), 3.73 (q, *J* = 7.1 Hz, 2H), 1.15 (t, *J* = 7.1 Hz, 3H).

**<sup>13</sup>C NMR (100 MHz, CDCl<sub>3</sub>):** δ 166.6 (C), 164.3 (C), 161.0 (C), 156.8 (C), 140.8 (C), 132.2 (CH), 131.0 (CH), 120.5 (CH), 119.4 (C), 114.5 (CH), 114.04 (CH), 113.94 (CH), 55.6 (CH<sub>3</sub>), 45.2 (CH<sub>2</sub>), 13.5 (CH<sub>3</sub>).

**IR (FTIR):** 3294, 2940, 2842, 2360, 1748, 1701, 1601, 1446, 1286, 1246, 1209, 1172 cm<sup>-1</sup>.

**HRMS (ESI) m/z:** Exact mass calcd for C<sub>18</sub>H<sub>20</sub>N<sub>2</sub>O<sub>5</sub>Na [M+Na]<sup>+</sup>: 367.1291. Found: 367.1270.

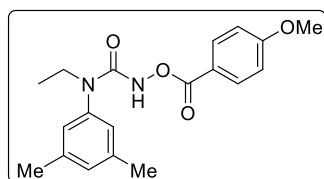

**1-(3,5-Dimethylphenyl)-1-ethyl-3-((4-methoxybenzoyl)oxy)urea (1af):** The title compound was synthesized according to general procedure **D** using *N*-ethyl-3,5-dimethylaniline (1.49 g, 10.0 mmol), toluene (0.8 M), KOH pellets (0.561 g, 10.0 mmol), and water (2.9 M) at 0 °C. A dripping funnel was affixed on top of the roundbottom flask and



this apparatus was purged with argon for 10 minutes. Phosgene (15% in toluene) (16.4 mL, 23.0 mmol) was added to the dripping funnel under inert atmosphere, and was allowed to drip over 1 hour at 0 °C while stirring vigorously. The reaction was allowed to stir for an additional 30 minutes after complete addition of phosgene solution. Upon completion, the crude reaction mixture was bubbled with an argon balloon for 20 minutes in a well ventilated fumehood, to release any excess phosgene gas. The crude reaction mixture was then extracted to remove the aqueous layer, and then the organic phase was washed with brine (5.0 mL x1). The organic phase was collected and dried with Na<sub>2</sub>SO<sub>4</sub>. The solids were filtered over a cotton plug, and the filtrate was evaporated under reduced pressure to provide the crude (3,5-dimethylphenyl)(ethyl)carbamic chloride which was used in the next step without further purification.

To the crude (3,5-dimethylphenyl)(ethyl)carbamic chloride was added CH<sub>2</sub>Cl<sub>2</sub> (0.30 M) and cooled to 0 °C. To this was added hydroxylamine hydrochloride (0.695 g, 10.0 mmol), and followed immediately by Et<sub>3</sub>N (2.79 mL, 20.0 mmol). The reaction was allowed to warm to room temperature and stir overnight. Upon completion, the reaction was extracted with NaHCO<sub>3</sub> (10 mL x1), and then brine (10 mL x1). The organic phase was collected and dried with Na<sub>2</sub>SO<sub>4</sub>. The solids were filtered over a cotton plug, and the filtrate was evaporated under reduced pressure to provide the crude 1-(3,5-dimethylphenyl)-1-ethyl-3-hydroxyurea, which could be used in the next step without further purification.

To the crude 1-(3,5-dimethylphenyl)-1-ethyl-3-hydroxyurea was added CH<sub>2</sub>Cl<sub>2</sub> (0.30 M) and cooled to 0 °C. To this was added Et<sub>3</sub>N (1.39 mL, 10.0 mmol) followed immediately by dropwise addition of *p*-methoxybenzoylchloride (1.70 g, 10.0 mmol). The reaction was allowed to warm to room temperature and stirred overnight. Upon completion, the reaction was extracted with NaHCO<sub>3</sub> (10 mL x1), and then brine (10 mL x1). The organic phase was collected and dried with Na<sub>2</sub>SO<sub>4</sub>. The solids were filtered over a cotton plug, and the filtrate was evaporated under reduced pressure to provide the crude 1-(3,5-dimethylphenyl)-1-ethyl-3-((4-methoxybenzoyl)oxy)urea which was purified by flash column chromatography (20% EtOAc/Hexanes → 40% EtOAc/Hexanes) to yield a colourless oil (2.74 g, 80% over 3 steps).

**TLC R<sub>f</sub>:** 0.21 in 20% EtOAc/Hexanes.

**<sup>1</sup>H NMR (400 MHz, CDCl<sub>3</sub>):** δ 8.02-7.98 (m, 2H), 7.97 (br s, 1H), 7.00 (d, *J* = 0.6 Hz, 1H), 6.96 (d, *J* = 0.5 Hz, 2H), 6.91-6.88 (m, 2H), 3.83 (d, *J* = 3.6 Hz, 3H), 3.70 (q, *J* = 7.1 Hz, 2H), 2.33 (s, 6H), 1.13 (t, *J* = 7.1 Hz, 3H).

**<sup>13</sup>C NMR (100 MHz, CDCl<sub>3</sub>):** δ 166.5 (C), 164.1 (C), 156.7 (C), 140.0 (C), 139.3 (C), 132.1 (CH), 130.3 (CH), 125.8 (CH), 119.3 (C), 113.9 (CH), 55.5 (CH<sub>3</sub>), 45.0 (CH<sub>2</sub>), 21.2 (CH<sub>3</sub>), 13.4 (CH<sub>3</sub>).

**IR (FTIR):** 2970, 1744, 1695, 1602, 1510, 1454, 1310, 1245, 1167, 1062 cm<sup>-1</sup>.

**HRMS (ESI) m/z:** Exact mass calcd for C<sub>19</sub>H<sub>22</sub>N<sub>2</sub>O<sub>4</sub>Na [M+Na]<sup>+</sup>: 365.1458. Found: 365.1477.

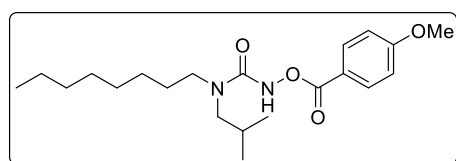

**3-((4-Methoxybenzoyl)oxy)-1-isobutyl-1-octylurea (1ag):**

The title compound was synthesized according to general procedure C using phenyl (4-methoxybenzoyl)oxycarbamate (0.861 g, 3.00 mmol), and *N*-isobutyloctylamine (0.555 g, 3.00 mmol) and imidazole (0.020 g, 0.30 mmol) in THF (15.0 mL, 0.20 M). The reaction was heated under microwave irradiation for 2 h at 100 °C. Upon completion, the reaction mixture was diluted with EtOAc (20 mL) and washed three times using 1 M NaOH (2.0 mL x 3), followed by a single brine wash (10 mL x 1). The organic phase was collected and dried over

Na<sub>2</sub>SO<sub>4</sub> (stirring for 15 min). The solids were filtered over a frit and rinsed with CH<sub>2</sub>Cl<sub>2</sub> (5.0 mL). The filtrate was collected, concentrated in vacuo and isolated using silica plug (20% EtOAc/Hexanes) to yield the title compound as a colourless oil (0.957 g, 84%).

**TLC R<sub>f</sub>:** 0.54 in 20% EtOAc/Hexanes.

**<sup>1</sup>H NMR (300 MHz, DMSO-*d*<sub>6</sub>):** δ 10.21-10.13 (br s, 1H), 8.01-7.91 (m, 2H), 7.15-7.03 (m, 2H), 3.85 (s, 3H), 3.23-3.14 (m, 2H), 3.03 (d, *J* = 7.4 Hz, 2H), 2.01-1.84 (m, 1H), 1.57-1.45 (m, 2H), 1.32-1.18 (m, 10H), 0.89-0.81 (m, 9H).

**<sup>13</sup>C NMR (100 MHz, DMSO-*d*<sub>6</sub>):** δ 165.2 (C), 163.5 (C), 157.4 (C), 131.4 (CH), 119.8 (C), 114.3 (CH), 55.6 (CH), 53.0 (CH<sub>2</sub>), 46.4 (CH<sub>2</sub>), 31.2 (CH<sub>2</sub>), 28.8 (CH<sub>2</sub>), 28.7 (CH<sub>2</sub>), 27.4 (CH<sub>2</sub>), 26.7 (CH), 26.2 (CH<sub>2</sub>), 22.1 (CH<sub>2</sub>), 19.8 (CH), 13.9 (CH<sub>3</sub>).

**IR (FTIR):** 3230, 2924, 2854, 1750, 1669, 1605, 1510, 1248 cm<sup>-1</sup>.

**HRMS (ESI) m/z:** Exact mass calcd for C<sub>21</sub>H<sub>34</sub>N<sub>2</sub>O<sub>4</sub>Na [M+Na]<sup>+</sup>: 401.2417. Found: 401.2423.

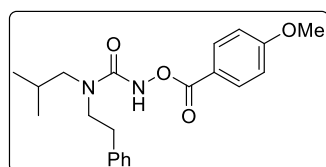

**1-Isobutyl-3-((4-methoxybenzoyl)oxy)-1-phenethylurea (1ah):** The title compound was synthesized according to general procedure C using phenyl (4-methoxybenzoyl)oxycarbamate (0.862 g, 3.00 mmol), and 2-(ethylamino)ethanol (0.532 g, 3.00 mmol) and imidazole (0.020 g, 0.30 mmol) in THF (10.0 mL, 0.30 M). The reaction was heated under microwave irradiation for 2 h at 100 °C. Upon completion, the reaction mixture was concentrated in vacuo and isolated using silica column chromatography (10% EtOAc/Hexanes → 30% EtOAc/Hexanes) to yield the title compound as a white solid (1.06 g, 95%).

**TLC R<sub>f</sub>:** 0.80 in 40% EtOAc/Hexanes.

**<sup>1</sup>H NMR (400 MHz, CDCl<sub>3</sub>):** δ 8.45 (br s, 1H), 8.06 (d, *J* = 9.0 Hz, 2H), 7.38-7.15 (m, 5H), 6.92 (d, *J* = 9.0 Hz, 2H), 3.84 (s, 3H), 3.50 (t, *J* = 7.7 Hz, 2H), 3.00 (d, *J* = 7.6 Hz, 2H), 2.92 (t, *J* = 7.7 Hz, 2H), 1.99 (dsxtet, *J* = 13.7, 6.9 Hz, 1H), 0.92 (d, *J* = 6.7 Hz, 6H).

**<sup>13</sup>C NMR (100 MHz, CDCl<sub>3</sub>):** δ 166.7 (C), 164.2 (C), 157.8 (C), 138.7 (C), 132.1 (CH), 128.8 (CH), 128.7 (CH), 126.6 (CH), 119.3 (C), 113.9 (CH), 55.5 (CH), 55.1 (CH<sub>2</sub>), 50.0 (CH<sub>2</sub>), 34.2 (CH<sub>2</sub>), 27.6 (CH), 20.1 (CH<sub>3</sub>).

**IR (FTIR):** 3181, 2957, 1744, 1649, 1603, 1509, 1244, 1168 cm<sup>-1</sup>.

**HRMS (ESI) m/z:** Exact mass calcd for C<sub>21</sub>H<sub>26</sub>N<sub>2</sub>O<sub>4</sub>Na [M+Na]<sup>+</sup>: 393.1784. Found: 393.1790.

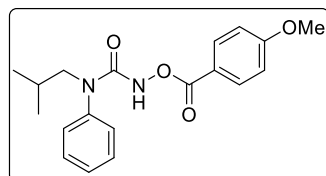

**3-((4-Methoxybenzoyl)oxy)-1-isobutyl-1-phenylurea (1ai):** The title compound was synthesized according to general procedure D using *N*-isobutylaniline (1.07 g, 7.20 mmol), toluene (0.8 M), KOH pellets (0.389 g, 7.20 mmol), and water (2.9 M) at 0 °C. A dripping funnel was affixed on top of the roundbottom flask and this apparatus was purged with argon for 10 minutes. Phosgene (15% in toluene) (11.8 mL, 23.0 mmol) was added to the dripping funnel under inert atmosphere, and was allowed to drip over 1 hour at 0 °C while stirring vigorously. The reaction was allowed to stir for an additional 30 minutes after complete addition of phosgene solution. Upon completion, the crude reaction mixture was bubbled with an argon balloon for 20 minutes in a well ventilated fumehood, to release any excess phosgene gas. The crude reaction mixture was then

extracted to remove the aqueous layer, and then the organic phase was washed with brine (5.0 mL x1). The organic phase was collected and dried with Na<sub>2</sub>SO<sub>4</sub>. The solids were filtered over a cotton plug, and the filtrate was evaporated under reduced pressure to provide the crude *N*-isobutylanilinecarbamoyl chloride which was used in the next step without further purification.

To the crude *N*-isobutylanilinecarbamoyl chloride was added CH<sub>2</sub>Cl<sub>2</sub> (0.30 M) and cooled to 0 °C. To this was added hydroxylamine hydrochloride (0.500 g, 7.20 mmol), and followed immediately by Et<sub>3</sub>N (1.00 mL, 14.4 mmol). The reaction was allowed to warm to room temperature and stir overnight. Upon completion, the reaction was extracted with NaHCO<sub>3</sub> (10 mL x1), and then brine (10 mL x1). The organic phase was collected and dried with Na<sub>2</sub>SO<sub>4</sub>. The solids were filtered over a cotton plug, and the filtrate was evaporated under reduced pressure to provide the crude *N*-isobutylanilinehydroxyurea, which could be used in the next step without further purification.

To the crude *N*-isobutylanilinehydroxyurea (1.38 g, 6.63 mmol) was added CH<sub>2</sub>Cl<sub>2</sub> (0.30 M) and cooled to 0 °C. To this was added Et<sub>3</sub>N (0.92 mL, 6.63 mmol) followed immediately by dropwise addition of *p*-methoxybenzoylchloride (1.13 g, 6.63 mmol). The reaction was allowed to warm to room temperature and stirred overnight. Upon completion, the reaction was extracted with NaHCO<sub>3</sub> (5.0 mL x1), and then brine (5.0 mL x1). The organic phase was collected and dried with Na<sub>2</sub>SO<sub>4</sub>. The solids were filtered over a cotton plug, and the filtrate was evaporated under reduced pressure to provide the crude 3-((4-methoxybenzoyl)oxy)-1-isobutyl-1-phenylurea which was purified by recrystallization with Et<sub>2</sub>O to yield a white crystalline solid (1.23 g, 36% over 3 steps).

**TLC R<sub>f</sub>:** 0.34 in 20% EtOAc/Hexanes.

**M.p.:** 137.0-137.7°C.

**<sup>1</sup>H NMR (400 MHz, CDCl<sub>3</sub>):** δ 8.06-8.00 (m, 2H), 7.98-7.96 (br s, 1H), 7.53-7.46 (m, 2H), 7.45-7.37 (m, 3H), 6.96-6.90 (m, 2H), 3.87 (s, 3H), 3.57 (d, *J* = 7.4 Hz, 2H), 1.87-1.75 (m, 1H), 0.95 (d, *J* = 6.6 Hz, 6H).

**<sup>13</sup>C NMR (100 MHz, CDCl<sub>3</sub>):** δ 166.5 (C), 164.1 (C), 157.3 (C), 140.0 (C), 132.1 (CH), 130.2 (CH), 128.5 (CH), 128.2 (CH), 119.2 (C), 113.9 (CH), 57.2 (CH<sub>2</sub>), 55.5 (CH), 26.9 (CH), 19.9 (CH).

**IR (FTIR):** 2960, 1741, 1709, 1604, 1490, 1246, 1173, 1053 cm<sup>-1</sup>.

**HRMS (ESI) m/z:** Exact mass calcd for C<sub>19</sub>H<sub>22</sub>N<sub>2</sub>O<sub>4</sub>Na [M+Na]<sup>+</sup>: 365.1478. Found: 365.1501.

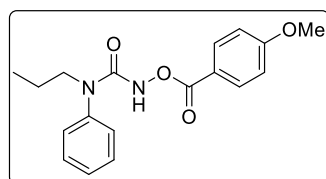

**3-((4-Methoxybenzoyl)oxy)-1-phenyl-1-propylurea (1aj):** The title compound was synthesized according to general procedure **D** using *N*-propylaniline (0.812 g, 6.00 mmol), toluene (0.8 M), KOH pellets (0.336 g, 6.00 mmol), and water (2.9 M) at 0 °C. A dripping funnel was affixed on top of the roundbottom flask and this apparatus was purged with argon

for 10 minutes. Phosgene (15% in toluene) (9.8 mL, 14 mmol) was added to the dripping funnel under inert atmosphere, and was allowed to drip over 1 hour at 0 °C while stirring vigorously. The reaction was allowed to stir for an additional 30 minutes after complete addition of phosgene solution. Upon completion, the crude reaction mixture was bubbled with an argon balloon for 20 minutes in a well ventilated fumehood, to release any excess phosgene gas. The crude reaction mixture was then extracted to remove the aqueous layer, and then the organic phase was washed with brine (5.0 mL x1). The organic phase was collected and dried with Na<sub>2</sub>SO<sub>4</sub>. The solids were filtered over a cotton plug, and the filtrate was evaporated under reduced pressure to provide the crude *N*-propylanilinecarbamoyl chloride which was used in the next step without further purification.

To the crude *N*-propylanilinecarbamoyl chloride was added CH<sub>2</sub>Cl<sub>2</sub> (0.30 M) and cooled to 0 °C. To this was added hydroxylamine hydrochloride (0.417 g, 6.00 mmol), and followed immediately by Et<sub>3</sub>N (1.67 mL, 12.0 mmol). The reaction was allowed to warm to room temperature and stir overnight. Upon

completion, the reaction was extracted with  $\text{NaHCO}_3$  (5.0 mL x1), and then brine (5.0 mL x1). The organic phase was collected and dried with  $\text{Na}_2\text{SO}_4$ . The solids were filtered over a cotton plug, and the filtrate was evaporated under reduced pressure to provide the crude *N*-propylanilinehydroxyurea, which could be used in the next step without further purification.

To the crude *N*-propylanilinehydroxyurea (0.927 g, 5.45 mmol) was added  $\text{CH}_2\text{Cl}_2$  (0.30 M) and cooled to 0 °C. To this was added  $\text{Et}_3\text{N}$  (0.76 mL, 5.45 mmol) followed immediately by dropwise addition of *p*-methoxybenzoylchloride (1.06 g, 5.45 mmol). The reaction was allowed to warm to room temperature and stirred overnight. Upon completion, the reaction was extracted with  $\text{NaHCO}_3$  (5.0 mL x1), and then brine (5.0 mL x1). The organic phase was collected and dried with  $\text{Na}_2\text{SO}_4$ . The solids were filtered over a cotton plug, and the filtrate was evaporated under reduced pressure to provide the crude 3-((4-methoxybenzoyl)oxy)-1-phenyl-1-propylurea which was purified by recrystallization with  $\text{Et}_2\text{O}$  to yield a white crystalline solid (0.935 g, 48% over 3 steps).

**TLC  $R_f$ :** 0.40 in 20% EtOAc/Hexanes.

**M.p.:** 118.3-119.4°C.

**$^1\text{H}$  NMR (400 MHz,  $\text{CDCl}_3$ ):**  $\delta$  8.06-7.99 (m, 2H), 7.98-7.95 (br s, 1H), 7.54-7.46 (m, 2H), 7.45-7.37 (m, 3H), 6.97-6.89 (m, 2H), 3.87 (s, 3H), 3.71-3.66 (m, 2H), 1.59 (dq,  $J$  = 14.9, 7.5 Hz, 2H), 0.93 (t,  $J$  = 7.4 Hz, 3H).

**$^{13}\text{C}$  NMR (100 MHz,  $\text{CDCl}_3$ ):**  $\delta$  166.5 (C), 164.2 (C), 156.9 (C), 139.7 (C), 132.1 (CH), 130.2 (CH), 128.6 (CH), 128.3 (CH), 119.2 (C), 113.9 (CH), 55.5 (CH), 51.7 ( $\text{CH}_2$ ), 21.2 ( $\text{CH}_2$ ), 11.0 ( $\text{CH}_3$ ).

**IR (FTIR):** 3291, 2913, 1748, 1716, 1605, 1490, 1247, 1175  $\text{cm}^{-1}$ .

**HRMS (ESI)  $m/z$ :** Exact mass calcd for  $\text{C}_{18}\text{H}_{20}\text{N}_2\text{O}_4\text{Na}$   $[\text{M}+\text{Na}]^+$ : 351.1321. Found: 351.1347.

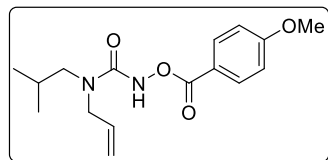

**1-Allyl-1-isobutyl-3-((4-methoxybenzoyl)oxy)urea (1ak):** The title compound was synthesized according to general procedure C using phenyl (4-methoxybenzoyl)oxycarbamate (0.862 g, 3.00 mmol), and *N*-isobutylprop-2-en-1-amine (0.340 g, 3.00 mmol) and imidazole (0.020 g, 0.30 mmol) in THF (10.0 mL, 0.30 M). The reaction was heated under microwave irradiation for 2 h at 100 °C. Upon completion, the reaction mixture was concentrated in vacuo and isolated using silica column chromatography (10% EtOAc/Hexanes  $\rightarrow$  20% EtOAc/Hexanes) to yield the title compound as a white solid (0.919 g, 95%).

**TLC  $R_f$ :** 0.22 in 20% EtOAc/Hexanes.

**$^1\text{H}$  NMR (400 MHz,  $\text{CDCl}_3$ ):**  $\delta$  8.53 (br s, 1H), 8.08-8.05 (m, 2H), 6.95-6.92 (m, 2H), 5.92-5.81 (m, 1H), 5.37-5.30 (m, 2H), 3.95 (td,  $J$  = 3.4, 1.7 Hz, 2H), 3.86 (d,  $J$  = 5.3 Hz, 3H), 3.16 (d,  $J$  = 7.5 Hz, 2H), 1.98 (dsextet,  $J$  = 13.7, 6.8 Hz, 1H), 0.95 (d,  $J$  = 6.7 Hz, 6H).

**$^{13}\text{C}$  NMR (100 MHz,  $\text{CDCl}_3$ ):**  $\delta$  166.7 (C), 164.2 (C), 158.2 (C), 132.7 (CH), 132.1 (CH), 119.3 (C), 117.5 ( $\text{CH}_2$ ), 113.9 (CH), 55.5 ( $\text{CH}_3$ ), 55.1 ( $\text{CH}_2$ ), 49.9 ( $\text{CH}_2$ ), 27.5 (CH), 20.1 ( $\text{CH}_3$ ).

**IR (FTIR):** 3277, 2953, 1739, 1685, 1463, 1253, 1024  $\text{cm}^{-1}$ .

**HRMS (ESI)  $m/z$ :** Exact mass calcd for  $\text{C}_{16}\text{H}_{22}\text{N}_2\text{O}_4\text{Na}$   $[\text{M}+\text{Na}]^+$ : 329.1491. Found: 329.1477.

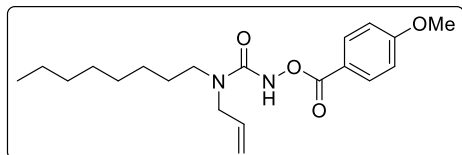

**1-Allyl-3-((4-methoxybenzoyl)oxy)-1-octylurea (1al):** The title compound was synthesized according to general procedure C using phenyl (4-methoxybenzoyl)oxycarbamate (0.862 g, 3.00 mmol), and *N*-allyloctan-1-amine (0.508 g, 3.00 mmol) and imidazole (0.020 g, 0.30 mmol) in THF (10.0 mL, 0.30 M). The reaction was heated under microwave irradiation for 2 h at 100 °C. Upon completion, the reaction mixture was concentrated in vacuo and isolated using silica column chromatography (10% EtOAc/Hexanes → 20% EtOAc/Hexanes) to yield the title compound as a white solid (0.870 g, 80%).

**TLC  $R_f$ :** 0.28 in 20% EtOAc/Hexanes.

**$^1\text{H}$  NMR (400 MHz,  $\text{CDCl}_3$ ):**  $\delta$  8.47 (s, 1H), 8.05 (d,  $J$  = 9.0 Hz, 2H), 6.91 (d,  $J$  = 9.0 Hz, 2H), 5.85 (ddt,  $J$  = 17.3, 10.3, 5.2 Hz, 1H), 5.35-5.27 (m, 2H), 3.92 (dt,  $J$  = 5.2, 1.6 Hz, 2H), 3.84 (s, 3H), 3.30 (t,  $J$  = 7.6 Hz, 2H), 1.60 (s, 3H), 1.28-1.25 (m, 11H), 0.85 (t,  $J$  = 6.7 Hz, 3H).

**$^{13}\text{C}$  NMR (100 MHz,  $\text{CDCl}_3$ ):**  $\delta$  166.7 (C), 164.2 (C), 157.8 (C), 132.9 (CH), 132.1 (CH), 119.3 (C), 117.4 ( $\text{CH}_2$ ), 113.9 (CH), 55.5 ( $\text{CH}_3$ ), 49.5 ( $\text{CH}_2$ ), 47.8 ( $\text{CH}_2$ ), 31.8 ( $\text{CH}_2$ ), 29.34 ( $\text{CH}_2$ ), 29.22 ( $\text{CH}_2$ ), 28.2 ( $\text{CH}_2$ ), 26.9 ( $\text{CH}_2$ ), 22.6 ( $\text{CH}_2$ ), 14.1 ( $\text{CH}_3$ ).

**IR (FTIR):** 3270, 2922, 2854, 1737, 1692, 1601, 163, 1251  $\text{cm}^{-1}$ .

**HRMS (ESI)  $m/z$ :** Exact mass calcd for  $\text{C}_{20}\text{H}_{30}\text{N}_2\text{O}_4\text{Na}$  [ $\text{M}+\text{Na}$ ] $^+$ : 385.2099. Found: 385.2103.

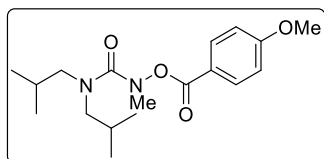

**3-((4-Methoxybenzoyl)oxy)-1,1-diisobutyl-3-methylurea (1am):** The title compound was synthesized according to general procedure D using *N,N*-diisobutylamine (1.75 mL, 10.0 mmol), toluene (0.8 M), NaOH pellets (0.400 g, 10.0 mmol), and water (2.9 M) at 0 °C. A dripping funnel was affixed on top of the roundbottom flask and this apparatus was

purged with argon for 10 minutes. Phosgene (15% in toluene) (16.4 mL, 23.0 mmol) was added to the dripping funnel under inert atmosphere, and was allowed to drip over 1 hour at 0 °C while stirring vigorously. The reaction was allowed to stir for an additional 30 minutes after complete addition of phosgene solution. Upon completion, the crude reaction mixture was bubbled with an argon balloon for 20 minutes in a well ventilated fumehood, to release any excess phosgene gas. The crude reaction mixture was then extracted to remove the aqueous layer, and then the organic phase was washed with brine (5.0 mL x1). The organic phase was collected and dried with  $\text{Na}_2\text{SO}_4$ . The solids were filtered over a cotton plug, and the filtrate was evaporated under reduced pressure to provide the crude *N,N*-diisobutylaminecarbamoyl chloride which was used in the next step without further purification.

To the crude *N,N*-diisobutylaminecarbamoyl chloride was added  $\text{CH}_2\text{Cl}_2$  (0.30 M) and cooled to 0 °C. To this was added hydroxylamine hydrochloride (0.835 g, 10.0 mmol), and followed immediately by  $\text{Et}_3\text{N}$  (2.79 mL, 20.0 mmol). The reaction was allowed to warm to room temperature and stir overnight. Upon completion, the reaction was extracted with  $\text{NaHCO}_3$  (10 mL x1), and then brine (10 mL x1). The organic phase was collected and dried with  $\text{Na}_2\text{SO}_4$ . The solids were filtered over a cotton plug, and the filtrate was evaporated under reduced pressure to provide the crude *N,N*-diisobutylaminehydroxyurea, which could be used in the next step without further purification.

To the crude *N,N*-diisobutylaminehydroxyurea (1.77 g, 8.80 mmol) was added  $\text{CH}_2\text{Cl}_2$  (0.30 M) and cooled to 0 °C. To this was added  $\text{Et}_3\text{N}$  (1.23 mL, 8.80 mmol) followed immediately by dropwise addition of *p*-methoxybenzoylchloride (1.19 mL, 8.80 mmol). The reaction was allowed to warm to room temperature and stirred overnight. Upon completion, the reaction was extracted with  $\text{NaHCO}_3$  (5.0 mL x1), and then brine (5.0 mL x1). The organic phase was collected and dried with  $\text{Na}_2\text{SO}_4$ . The solids were filtered over a cotton plug, and the filtrate was evaporated under reduced pressure to provide

the crude 3-((4-methoxybenzoyl)oxy)-1,1-diisobutyl-3-methylurea which was purified by flash column chromatography (10 % EtOAc/Hexanes) to yield a colourless oil (0.760 g, 23% over 3 steps).

**TLC  $R_f$ :** 0.65 in 20% EtOAc/Hexanes.

**$^1\text{H}$  NMR (400 MHz,  $\text{CDCl}_3$ ):**  $\delta$  8.04-7.97 (m, 2H), 6.98-6.90 (m, 2H), 3.88 (s, 3H), 3.17-3.09 (m, 7H), 1.98 (dt,  $J$  = 13.8, 7 Hz, 2H), 0.88 (d,  $J$  = 6.9 Hz, 12H).

**$^{13}\text{C}$  NMR (100 MHz,  $\text{CDCl}_3$ ):**  $\delta$  164.0 (C), 163.9 (C), 163.3 (C), 131.7 (CH), 120.3 (C), 113.9 (CH), 55.5 (CH), 54.6 ( $\text{CH}_2$ ), 40.1 (CH), 26.4 (CH), 20.0 ( $\text{CH}_3$ ).

**IR (FTIR):** 2655, 1692, 1622, 1534, 1332, 1261  $\text{cm}^{-1}$ .

**HRMS (ESI)  $m/z$ :** Exact mass calcd for  $\text{C}_{18}\text{H}_{28}\text{N}_2\text{O}_4\text{Na}$   $[\text{M}+\text{Na}]^+$ : 359.1947. Found: 359.1957.

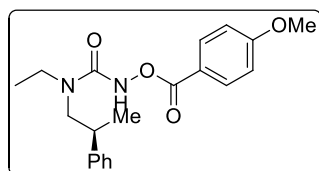

**1-Ethyl-3-((4-methoxybenzoyl)oxy)-1-(2-phenylpropyl)urea (1an):**

The title compound was synthesized according to general procedure C using phenyl (4-methoxybenzoyl)oxycarbamate (0.862 g, 3.00 mmol), and (S)-N-ethyl-2-phenylpropan-1-amine (0.490 g, 3.00 mmol) and imidazole (0.020 g, 0.30 mmol) in THF (15.0 mL, 0.20 M). The reaction was heated under microwave irradiation for 2 h at 100 °C. Upon completion, the reaction mixture was diluted with EtOAc (20 mL) and washed three times using 1 M NaOH (2.0 mL x 3), followed by a single brine wash (10 mL x 1). The organic phase was collected and dried over  $\text{Na}_2\text{SO}_4$  (stirring for 15 min). The solids were filtered over a frit and rinsed with  $\text{CH}_2\text{Cl}_2$  (5.0 mL). The filtrate was collected, concentrated vacuo and isolated using silica plug (20% EtOAc/Hexanes  $\rightarrow$  40% EtOAc/Hexanes) to yield the title compound as a (0.950 g, 89%).

**TLC  $R_f$ :** 0.19 in 20% EtOAc/Hexanes.

**$[\alpha]_D^{26^\circ\text{C}}$ :** +45.5 (C = 0.1 M in  $\text{CH}_2\text{Cl}_2$ ).

**$^1\text{H}$  NMR (400 MHz,  $\text{CDCl}_3$ ):**  $\delta$  8.26 (br s, 1H), 8.11-7.99 (m, 2H), 7.35-7.27 (m, 2H), 7.27-7.17 (m, 3H), 6.98-6.86 (m, 2H), 3.85 (s, 3H), 3.58 (dd,  $J$  = 6.4, 13.6 Hz, 1H), 3.27-3.11 (m, 3H), 2.96 (qd,  $J$  = 7.2, 14.6 Hz, 1H), 1.35-1.27 (m, 3H), 1.18-1.03 (m, 3H).

**$^{13}\text{C}$  NMR (100 MHz,  $\text{CDCl}_3$ ):**  $\delta$  166.4 (C), 164.2 (C), 157.7 (C), 144.0 (C), 132.1 (CH), 128.8 (CH), 127.3 (CH), 126.8 (CH), 119.4 (C), 113.9 (CH), 55.5 ( $\text{CH}_3$ ), 54.6 ( $\text{CH}_2$ ), 42.6 ( $\text{CH}_2$ ), 38.8 (CH), 18.6 ( $\text{CH}_3$ ), 12.9 ( $\text{CH}_3$ ).

**IR (FTIR):** 3216, 2966, 1747, 1668, 1604, 1509, 1454, 1245, 1167  $\text{cm}^{-1}$ .

**HRMS (ESI)  $m/z$ :** Exact mass calcd for  $\text{C}_{20}\text{H}_{24}\text{N}_2\text{O}_4\text{Na}$   $[\text{M}+\text{Na}]^+$ : 379.1628. Found: 379.1634.

*Synthesis of imidazolidin-2-one via photoinduced C-H amination*

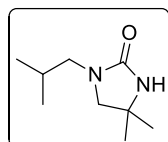

**1-Isobutyl-4,4-dimethylimidazolidin-2-one (2a):** The title compound was synthesized according to general procedure G using 1,1-diisobutyl-3-((4-methoxybenzoyl)oxy)urea (0.161 g, 0.500 mmol), tris(2,2'-bipyridine)ruthenium(II) hexafluorophosphate (0.009 g, 2 mol%), triethylamine (0.056 g, 0.55 mmol) in MeCN (2.5 mL, 0.2 M) in a 8 mL Kimax glass vial with a Teflon screw cap and a stir bar. The

vial was placed in an ice bath and purged with Argon for 10 min. The vial was positioned between 2 and 4 cm from the light source (blue LED strips) and allowed to stir overnight at ambient temperature. Upon completion, the reaction was concentrated under reduced pressure, diluted in  $\text{CH}_2\text{Cl}_2$  (5.0 mL) and extracted three times with sodium bicarbonate (3 x 2 mL) to remove the benzoic acid. The organic phase was collected, dried with  $\text{Na}_2\text{SO}_4$ , filtered, and concentrated under reduced pressure. The title compound was purified by column chromatography (50% EtOAc/ $\text{CH}_2\text{Cl}_2$ ) to yield an amorphous white solid (0.080 g, 95%).

**TLC  $R_f$ :** 0.30 in 50% EtOAc/ $\text{CH}_2\text{Cl}_2$ .

**$^1\text{H}$  NMR (400 MHz,  $\text{CDCl}_3$ ):**  $\delta$  4.34 (br. s, 1H), 3.14 (s, 2H), 2.96 (d,  $J = 7.5$  Hz, 2H), 1.89-1.76 (m, 1H), 1.29 (s, 6H), 0.90 (d,  $J = 6.7$  Hz, 6H).

**$^{13}\text{C}$  NMR (100 MHz,  $\text{CDCl}_3$ ):**  $\delta$  161.4 (C), 58.7 ( $\text{CH}_2$ ), 52.1 (C), 50.9 ( $\text{CH}_2$ ), 28.6 ( $\text{CH}_3$ ), 27.1 (CH), 20.1 ( $\text{CH}_3$ ).

**IR (FTIR):** 3208, 3074, 2955, 2871, 1683, 1488, 1448, 1295, 1240  $\text{cm}^{-1}$ .

**HRMS (EI)  $m/z$ :** Exact mass calcd for  $\text{C}_9\text{H}_{18}\text{N}_2\text{O}$   $[\text{M}]^+$ : 170.1419. Found: 170.1407.

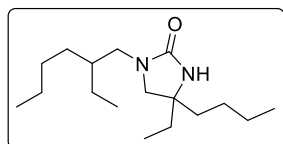

**4-Butyl-4-methyl-1-(2-ethylhexyl)imidazolidin-2-one1-isobutyl-4,4-dimethylimidazolidin-2-one (2b):** The title compound was synthesized according to general procedure G using 3-((4-methoxybenzoyl)oxy)-1,1-bis(2-ethylhexyl)urea (0.196 g, 0.450 mmol), tris(2,2'-bipyridine)ruthenium(II) hexafluorophosphate (0.009 g, 2 mol%), triethylamine (0.056 g, 0.55 mmol) in MeCN (2.5 mL, 0.2 M) in a 8 mL Kimax glass vial with a Teflon screw cap and a stir bar. The vial was placed in an ice bath and purged with Argon for 10 min. The vial was positioned between 2 and 4 cm from the light source (blue LED strips) and allowed to stir overnight at ambient temperature. Upon completion, the reaction was concentrated under reduced pressure, diluted in  $\text{CH}_2\text{Cl}_2$  (5.0 mL) and extracted three times with sodium bicarbonate (3 x 2 mL) to remove the benzoic acid. The organic phase was collected, dried with  $\text{Na}_2\text{SO}_4$ , filtered, and concentrated under reduced pressure. The title compound was purified by column chromatography (60% EtOAc/ $\text{CH}_2\text{Cl}_2$ ) to yield an amorphous white solid (0.095 g, 75% as a 1:1 diastereoisomers mixt).

**TLC  $R_f$ :** 0.21 in 2% MeOH/ $\text{CH}_2\text{Cl}_2$ .

**$^1\text{H}$  NMR (300 MHz,  $\text{DMSO}-d_6$ ):**  $\delta$  6.37-6.34 (br s, 1H), 3.02-2.99 (m, 2H), 2.91-2.86 (m, 2H), 1.51-1.33 (m, 5H), 1.32-1.11 (m, 14H), 0.91-0.75 (m, 14H).

**$^{13}\text{C}$  NMR (100 MHz,  $\text{DMSO}-d_6$ ):**  $\delta$  160.6 (C), 56.0 (C), 56.0 (C), 54.0 ( $\text{CH}_2$ ), 53.9 ( $\text{CH}_2$ ), 46.2 ( $\text{CH}_2$ ), 38.7 ( $\text{CH}_2$ ), 38.7 ( $\text{CH}_2$ ), 37.0 ( $\text{CH}_2$ ), 36.9 (CH), 31.8 ( $\text{CH}_2$ ), 31.8 ( $\text{CH}_2$ ), 30.1 ( $\text{CH}_2$ ), 28.2 ( $\text{CH}_2$ ), 28.1 ( $\text{CH}_2$ ), 25.3 ( $\text{CH}_2$ ), 23.5 ( $\text{CH}_2$ ), 23.5 ( $\text{CH}_2$ ), 22.7 ( $\text{CH}_2$ ), 22.6 ( $\text{CH}_2$ ), 22.6 ( $\text{CH}_2$ ), 22.5 ( $\text{CH}_2$ ), 14.0 (CH), 13.9 (CH), 10.5 ( $\text{CH}_3$ ), 10.5 ( $\text{CH}_3$ ), 7.7 ( $\text{CH}_3$ ), 7.7 ( $\text{CH}_3$ ).

**IR (FTIR):** 3196, 3069, 2967, 2893, 1685, 1441, 1118  $\text{cm}^{-1}$ .

**HRMS (EI)  $m/z$ :** Exact mass calcd for  $\text{C}_{15}\text{H}_{30}\text{N}_2\text{O}$   $[\text{M}]^+$ : 282.2671. Found: 282.2655.

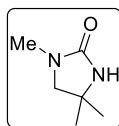

**1,4,4-Trimethylimidazolidin-2-one (2c):** The title compound was synthesized according to general procedure G using 1-isobutyl-3-((4-methoxybenzoyl)oxy)-1-methylurea (0.140 g, 0.500 mmol), tris(2,2'-bipyridine)ruthenium(II) hexafluorophosphate (0.009 g, 2 mol%), triethylamine (0.056 g, 0.55 mmol) in MeCN (2.5 mL, 0.2 M) in a 8 mL Kimax glass vial

with a Teflon screw cap and a stir bar. The vial was placed in an ice bath and purged with Argon for 10 min. The vial was positioned between 2 and 4 cm from the light source (blue LED strips) and allowed to stir overnight at ambient temperature. Upon completion, the reaction was concentrated under reduced pressure, diluted in  $\text{CH}_2\text{Cl}_2$  (5.0 mL) and extracted three times with sodium bicarbonate (3 x 2 mL) to remove the benzoic acid. The organic phase was collected, dried with  $\text{Na}_2\text{SO}_4$ , filtered, and concentrated under reduced pressure. The title compound was purified by column chromatography (50% EtOAc/ $\text{CH}_2\text{Cl}_2$ ) to yield an amorphous white solid (0.060 g, 93%).

**TLC  $R_f$ :** 0.16 in 50% EtOAc/ $\text{CH}_2\text{Cl}_2$ .

**$^1\text{H}$  NMR (300 MHz,  $\text{CDCl}_3$ ):**  $\delta$  4.57 (br. s, 1H), 3.13 (s, 2H), 2.77 (s, 3H), 1.28 (s, 6H).

**$^{13}\text{C}$  NMR (100 MHz,  $\text{CDCl}_3$ ):**  $\delta$  161.5 (C), 60.7 ( $\text{CH}_2$ ), 51.9 (C), 30.6 ( $\text{CH}_3$ ), 28.6 ( $\text{CH}_3$ ).

**IR (FTIR):** 3540, 3475, 3224, 2955, 2927, 2846, 1673, 1502, 1446, 1405, 1305  $\text{cm}^{-1}$ .

**HRMS (EI)  $m/z$ :** Exact mass calcd for  $\text{C}_6\text{H}_{12}\text{N}_2\text{O}$   $[\text{M}]^+$ : 128.0950. Found: 128.0945.

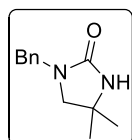

**1-Benzyl-4,4-dimethylimidazolidin-2-one (2d):** The title compound was synthesized according to general procedure **G** using 1-benzyl-1-isobutyl-3-((4-methoxybenzoyl)oxy)urea (0.190 g, 0.500 mmol), tris(2,2'-bipyridine)ruthenium(II) hexafluorophosphate (0.009 g, 2 mol%), triethylamine (0.056 g, 0.55 mmol) in MeCN (2.5 mL, 0.2 M) in a 8 mL Kimax glass vial with a Teflon screw cap and a stir bar. The vial was placed in an ice bath and purged with Argon for 10 min. The vial was positioned between 2 and 4 cm from the light source (blue LED strips) and allowed to stir overnight at ambient temperature. Upon completion, the reaction was concentrated under reduced pressure, diluted in  $\text{CH}_2\text{Cl}_2$  (5.0 mL) and extracted three times with sodium bicarbonate (3 x 2 mL) to remove the benzoic acid. The organic phase was collected, dried with  $\text{Na}_2\text{SO}_4$ , filtered, and concentrated under reduced pressure. The title compound was purified by column chromatography (50% EtOAc/ $\text{CH}_2\text{Cl}_2$ ) to yield an amorphous white solid (0.051 g, 50%).

**TLC  $R_f$ :** 0.35 in 50% EtOAc/ $\text{CH}_2\text{Cl}_2$ .

**$^1\text{H}$  NMR (400 MHz,  $\text{CDCl}_3$ ):**  $\delta$  7.33-7.23 (m, 5H), 4.50 (br s, 1H), 4.35 (s, 2H), 3.00 (s, 2H), 1.24 (s, 6H).

**$^{13}\text{C}$  NMR (100 MHz,  $\text{CDCl}_3$ ):**  $\delta$  160.9 (C), 137.2 (C), 128.6 (CH), 128.0 (CH), 127.4 (CH), 57.4 ( $\text{CH}_2$ ), 52.0 (C), 47.4 ( $\text{CH}_2$ ), 28.5 ( $\text{CH}_3$ ).

**IR (FTIR):** 3201, 3069, 2962, 2861, 1688, 1492, 1437, 1363, 1299  $\text{cm}^{-1}$ .

**HRMS (EI)  $m/z$ :** Exact mass calcd for  $\text{C}_{12}\text{H}_{16}\text{N}_2$   $[\text{M}]^+$ : 204.1263. Found: 204.1252.

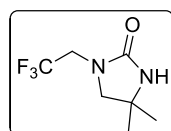

**4,4-Dimethyl-1-(2,2,2-trifluoroethyl)imidazolidin-2-one (2e):** The title compound was synthesized according to general procedure **G** using 1-isobutyl-3-((4-methoxybenzoyl)oxy)-1-(2,2,2-trifluoroethyl)urea (0.174 g, 0.500 mmol), tris(2,2'-bipyridine)ruthenium(II) hexafluorophosphate (0.009 g, 2 mol%), triethylamine (0.056 g, 0.55 mmol) in MeCN (2.5 mL, 0.2 M) in a 8 mL Kimax glass vial with a Teflon screw cap and a stir bar. The vial was placed in an ice bath and purged with Argon for 10 min. The vial was positioned between 2 and 4 cm from the light source (blue LED strips) and allowed to stir overnight at ambient temperature. Upon completion, the reaction was concentrated under reduced pressure, diluted in  $\text{CH}_2\text{Cl}_2$  (5.0 mL) and extracted three times with sodium bicarbonate (3 x 2 mL) to remove the benzoic acid.



acid. The organic phase was collected, dried with Na<sub>2</sub>SO<sub>4</sub>, filtered, and concentrated under reduced pressure. The title compound was purified by column chromatography (30% EtOAc/CH<sub>2</sub>Cl<sub>2</sub>) to yield an amorphous white solid (0.092 g, 94%).

**TLC R<sub>f</sub>:** 0.45 in 50% EtOAc/CH<sub>2</sub>Cl<sub>2</sub>.

**<sup>1</sup>H NMR (400 MHz, CDCl<sub>3</sub>):** δ 4.87 (br s, 1H), 3.78 (q, *J* = 9.1 Hz, 2H), 3.30 (s, 2H), 1.32 (s, 6H).

**<sup>13</sup>C NMR (100 MHz, CDCl<sub>3</sub>):** δ 160.3 (C), 124.7 (q, *J* = 278 Hz, C), 59.0 (CH<sub>2</sub>), 52.5 (C), 45.4 (q, *J* = 34 Hz, CH<sub>2</sub>), 28.4 (CH<sub>3</sub>).

**IR (FTIR):** 3223, 3082, 2976, 1697, 1446, 1416, 1313, 1265, 1221, 1149 cm<sup>-1</sup>.

**HRMS (EI) m/z:** Exact mass calcd for C<sub>7</sub>H<sub>11</sub>N<sub>2</sub>O<sub>3</sub> [M]<sup>+</sup>: 196.0823. Found: 196.0807.

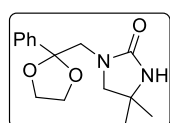

**4,4-Dimethyl-1-((2-phenyl-1,3-dioxolan-2-yl)methyl)imidazolidin-2-one (2f):** The title compound was synthesized according to general procedure **G** using 1-isobutyl-1-(2-phenyl-1,3-dioxolan-2-yl)isobutyl-3-((4-methoxybenzoyl)oxy)urea (0.214 g, 0.500 mmol), tris(2,2'-bipyridine)ruthenium(II) hexafluorophosphate (0.009 g, 2 mol%), triethylamine (0.056 g, 0.55 mmol) in MeCN (2.5 mL, 0.2 M) in a 8 mL Kimax glass vial with a Teflon screw cap and a stir bar. The vial was placed in an ice bath and purged with Argon for 10 min. The vial was positioned between 2 and 4 cm from the light source (blue LED strips) and allowed to stir overnight at ambient temperature. Upon completion, the reaction was concentrated under reduced pressure, diluted in CH<sub>2</sub>Cl<sub>2</sub> (5.0 mL) and extracted three times with sodium bicarbonate (3 x 2 mL) to remove the benzoic acid. The organic phase was collected, dried with Na<sub>2</sub>SO<sub>4</sub>, filtered, and concentrated under reduced pressure. The title compound was purified by column chromatography (50% EtOAc/CH<sub>2</sub>Cl<sub>2</sub>) to yield an amorphous white solid (0.118 g, 86%).

**TLC R<sub>f</sub>:** 0.13 in 2% MeOH/CH<sub>2</sub>Cl<sub>2</sub>.

**<sup>1</sup>H NMR (400 MHz, CDCl<sub>3</sub>):** δ 7.56-7.46 (m, 2H), 7.41-7.30 (m, 3H), 4.19-4.10 (br s, 1H), 4.09-4.00 (m, 2H), 3.91-3.79 (m, 2H), 3.58 (s, 2H), 3.23 (s, 2H), 1.20 (s, 6H).

**<sup>13</sup>C NMR (100 MHz, DMSO-*d*<sub>6</sub>):** δ 160.8 (C), 140.3 (C), 128.3 (CH), 128. (CH), 109.7 (C), 64.7 (CH<sub>2</sub>), 59.6 (CH<sub>2</sub>), 51.8 (C), 50.5 (CH<sub>2</sub>), 28.3 (CH<sub>3</sub>).

**IR (FTIR):** 3197, 3070, 2967, 2893, 1685, 1442, 1243, 1023 cm<sup>-1</sup>.

**HRMS (ESI) m/z:** Exact mass calcd for C<sub>15</sub>H<sub>20</sub>N<sub>2</sub>O<sub>3</sub>Na [M+Na]<sup>+</sup>: 299.1372. Found: 299.1394.

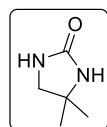

**4,4-Dimethylimidazolidin-2-one (2g):** The title compound was synthesized according to a modified general procedure **G** using 1-isobutyl-3-((4-methoxybenzoyl)oxy)urea (0.133 g, 0.500 mmol), tris(2,2'-bipyridine)ruthenium(II) hexafluorophosphate (0.009 g, 2 mol%), tetrabutylammonium dibutyl phosphate (0.026 g, 5 mol%) in CH<sub>2</sub>Cl<sub>2</sub> (5.0 mL, 0.2 M) in a 8 mL Kimax glass vial with a Teflon screw cap and a stir bar. The vial was placed in an ice bath and purged with Argon for 10 min. The vial was positioned between 2 and 4 cm from the light source (blue LED strips) and heated in a water bath at 60 °C overnight. Upon completion, the reaction was diluted in CH<sub>2</sub>Cl<sub>2</sub> (5.0 mL) and extracted three times with sodium bicarbonate (3 x 2 mL) to remove the benzoic acid. The organic phase was collected, dried with Na<sub>2</sub>SO<sub>4</sub>, filtered, and concentrated under reduced pressure. The title compound was purified by column chromatography (5% MeOH/CH<sub>2</sub>Cl<sub>2</sub> + 1% Et<sub>3</sub>N) to yield a clear oil (0.013 g, 22%).

**<sup>1</sup>H NMR (400 MHz, CDCl<sub>3</sub>):** δ 4.94-4.62 (br s, 2H), 3.23 (s, 2H), 1.31 (s, 6H).

**<sup>13</sup>C NMR (100 MHz, CDCl<sub>3</sub>):** δ 162.9 (C), 55.3 (C), 54.0 (CH<sub>2</sub>), 28.4 (CH<sub>3</sub>).

The <sup>1</sup>H NMR and <sup>13</sup>C NMR is in agreement with previous reports.<sup>18</sup>

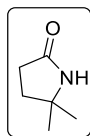

**5,5-Dimethylpyrrolidin-2-one (2h):** The title compound was synthesized according to general procedure **G** using *N*-((4-methoxybenzoyl)oxy)-4-methylpentanamide (0.265 g, 1.00 mmol), tris(2,2'-bipyridine)ruthenium(II) hexafluorophosphate (0.017 g, 2 mol%), triethylamine (0.026 g, 5 mol%) in CH<sub>2</sub>Cl<sub>2</sub> (5.0 mL, 0.2 M) in a 8 mL Kimax glass vial with a Teflon screw cap and a stir bar. The vial was placed in an ice bath and purged with Argon for 10 min. The vial was positioned between 2 and 4 cm from the light source (blue LED strips) and allowed to stir overnight at ambient temperature. Upon completion, the reaction was diluted in CH<sub>2</sub>Cl<sub>2</sub> (5.0 mL) and extracted three times with sodium bicarbonate (3 x 2 mL) to remove the benzoic acid. The organic phase was collected, dried with Na<sub>2</sub>SO<sub>4</sub>, filtered, and concentrated under reduced pressure. The title compound was purified by column chromatography (50% EtOAc/CH<sub>2</sub>Cl<sub>2</sub> → 100% EtOAc) to yield a clear oil (0.088 g, 78%).

**<sup>1</sup>H NMR (400 MHz, CDCl<sub>3</sub>):** δ 6.09 (s, 1H), 2.41 (dd, *J* = 8.4, 7.6 Hz, 2H), 1.93 (t, *J* = 8.0 Hz, 2H), 1.28 (s, 6H).

**<sup>13</sup>C NMR (100 MHz, CDCl<sub>3</sub>):** δ 177.1 (C), 56.7 (C), 35.5 (CH<sub>2</sub>), 30.8 (CH<sub>2</sub>), 29.3 (CH<sub>3</sub>).

The <sup>1</sup>H NMR and <sup>13</sup>C NMR is in agreement with previous reports.<sup>14</sup>

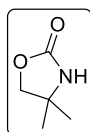

**4,4-Dimethyloxazolidin-2-one (2i):** The title compound was synthesized according to general procedure **G** using isobutyl ((4-methoxybenzoyl)oxy)carbamate (0.134 g, 0.500 mmol), tris(2,2'-bipyridine)ruthenium(II) hexafluorophosphate (0.009 g, 2 mol%), tetrabutylammonium dibutyl phosphate (0.011 g, 5 mol%) in CH<sub>2</sub>Cl<sub>2</sub> (2.5 mL, 0.2 M) in a 8 mL Kimax glass vial with a Teflon screw cap and a stir bar. The vial was placed in an ice bath and purged with Argon for 10 min. The vial was positioned between 2 and 4 cm from the light source (blue LED strips) and allowed to stir overnight at ambient temperature. Upon completion, the reaction was diluted in CH<sub>2</sub>Cl<sub>2</sub> (5.0 mL) and extracted three times with sodium bicarbonate (3 x 2 mL) to remove the benzoic acid. The organic phase was collected, dried with Na<sub>2</sub>SO<sub>4</sub>, filtered, and concentrated under reduced pressure. The title compound was purified by column chromatography (20% EtOAc/CH<sub>2</sub>Cl<sub>2</sub> → 100% EtOAc) to yield a clear oil (0.014 g, 24%).

**<sup>1</sup>H NMR (300 MHz, CDCl<sub>3</sub>):** δ 5.21-5.00 (br s, 1H), 4.09 (s, 2H), 1.37 (s, 6H).

**<sup>13</sup>C NMR (100 MHz, CDCl<sub>3</sub>):** δ 159.3 (C), 77.1 (C), 55.4 (CH<sub>2</sub>), 27.7 (CH<sub>3</sub>).

The <sup>1</sup>H NMR and <sup>13</sup>C NMR is in agreement with previous reports.<sup>14</sup>

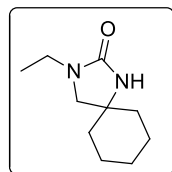

**3-Ethyl-1,3-diazaspiro[4.5]decan-2-one (2j):** The title compound was synthesized according to general procedure **G** using 3-((4-Methoxybenzoyl)oxy)-1-cyclohexylmethyl-1-ethylurea (0.167 g, 0.500 mmol), tris(2,2'-bipyridine)ruthenium(II) hexafluorophosphate (0.009 g, 2 mol%), triethylamine (0.056 g, 0.22 mmol) in MeCN (2.5 mL, 0.2 M) in a 8 mL Kimax glass vial with a Teflon screw cap and a stir bar. The vial was placed in an ice bath and purged with Argon for 10 min. The vial was positioned between 2 and 4 cm from the light source (blue LED strips) and allowed to stir

<sup>18</sup> Leung, M.-K.; Lai, J.-L.; Lau, K.-H.; Yu, H.-H.; Hsiao, H.-J. *J. Org. Chem.* **1996**, *61*, 4175.

overnight at ambient temperature. Upon completion, the reaction was concentrated under reduced pressure, diluted in  $\text{CH}_2\text{Cl}_2$  (5.0 mL) and extracted three times with sodium bicarbonate (3 x 2 mL) to remove the benzoic acid. The organic phase was collected, dried with  $\text{Na}_2\text{SO}_4$ , filtered, and concentrated under reduced pressure. The title compound was purified by column chromatography (40% EtOAc/Hexanes) to yield an amorphous white solid (0.080 g, 88%).

**TLC  $R_f$ :** 0.39 in 2% MeOH/ $\text{CH}_2\text{Cl}_2$ .

**$^1\text{H}$  NMR (400 MHz,  $\text{DMSO}-d_6$ ):**  $\delta$  6.65-6.60 (br s, 1H), 3.08-3.01 (m, 4H), 1.62-1.21 (m, 10H), 0.97 (t,  $J$  = 7.2 Hz, 3H).

**$^{13}\text{C}$  NMR (100 MHz,  $\text{DMSO}-d_6$ ):**  $\delta$  159.9 (C), 54.5 ( $\text{CH}_2$ ), 53.6 (C), 37.3 ( $\text{CH}_2$ ), 37.1 ( $\text{CH}_2$ ), 24.9 ( $\text{CH}_2$ ), 22.1 ( $\text{CH}_2$ ), 12.6 ( $\text{CH}_3$ ).

**IR (FTIR):** 3202, 2926, 2853, 1677, 1489, 1330, 1258, 1198  $\text{cm}^{-1}$ .

**HRMS (EI)  $m/z$ :** Exact mass calcd for  $\text{C}_{10}\text{H}_{18}\text{N}_2\text{O}$   $[M]^+$ : 182.1419. Found: 182.1413.

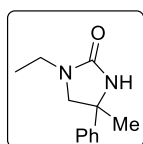

**1-Ethyl-4-methyl-4-phenylimidazolidin-2-one (2k):** The title compound was synthesized according to general procedure **G** using 1-ethyl-3-((4-methoxybenzoyl)oxy)-1-(2-phenylpropyl)urea (0.163 g, 0.500 mmol), tris(2,2'-bipyridine)ruthenium(II) hexafluorophosphate (0.009 g, 2 mol%), triethylamine (0.056 g, 0.55 mmol) in MeCN (2.5 mL, 0.2 M) in a 8 mL Kimax glass vial with a Teflon screw cap and a stir bar. The vial was placed in an ice bath and purged with Argon for 10 min. The vial was positioned between 2 and 4 cm from the light source (blue LED strips) and allowed to stir overnight at ambient temperature. Upon completion, the reaction was concentrated under reduced pressure, diluted in  $\text{CH}_2\text{Cl}_2$  (5.0 mL) and extracted three times with sodium bicarbonate (3 x 2 mL) to remove the benzoic acid. The organic phase was collected, dried with  $\text{Na}_2\text{SO}_4$ , filtered, and concentrated under reduced pressure. The title compound was purified by column chromatography (50% EtOAc/ $\text{CH}_2\text{Cl}_2$ ) to yield an amorphous white solid (0.079 g, 77%).

**TLC  $R_f$ :** 0.42 in 30% EtOAc/ $\text{CH}_2\text{Cl}_2$

**$^1\text{H}$  NMR (400 MHz,  $\text{CDCl}_3$ ):**  $\delta$  7.42-7.27 (m, 5H), 4.69-4.68 (m, 1H), 3.45 (q,  $J$  = 10.0 Hz, 2H), 3.39-3.17 (m, 2H), 1.68 (s, 3H), 1.10 (t,  $J$  = 7.2 Hz, 3H).

**$^{13}\text{C}$  NMR (100 MHz,  $\text{CDCl}_3$ ):**  $\delta$  160.8 (C), 145.9 (C), 128.8 (CH), 127.4 (CH), 124.9 (CH), 58.9 ( $\text{CH}_2$ ), 57.2 (C), 37.9 ( $\text{CH}_2$ ), 28.6 ( $\text{CH}_3$ ), 12.8 ( $\text{CH}_3$ ).

**IR (FTIR):** 3194, 3069, 2969, 2925, 2854, 1679, 1493, 1444, 1299, 1283, 1089  $\text{cm}^{-1}$ .

**HRMS (EI)  $m/z$ :** Exact mass calcd for  $\text{C}_{12}\text{H}_{16}\text{N}_2\text{O}$   $[M]^+$ : 204.1263. Found: 204.1237.

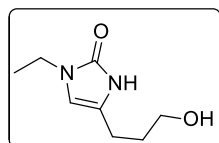

**1-Ethyl-4-(3-hydroxypropyl)-1H-imidazol-2(3H)-one (2l):** The title compound was synthesized according to general procedure **G** using 1-ethyl-3-((4-methoxybenzoyl)oxy)-1-((tetrahydrofuran-2-yl)methyl)urea (0.161 g, 0.500 mmol), tris(2,2'-bipyridine)ruthenium(II) hexafluorophosphate (0.009 g, 2 mol%), triethylamine (0.056 g, 0.55 mmol) in MeCN (2.5 mL, 0.2 M) in a 8 mL Kimax glass vial with a Teflon screw cap and a stir bar. The vial was placed in an ice bath and purged with Argon for 10 min. The vial was positioned between 2 and 4 cm from the light source (blue LED strips) and allowed to stir overnight at ambient temperature. Upon completion, the reaction was concentrated under reduced pressure, diluted in  $\text{CH}_2\text{Cl}_2$  (5.0 mL) and extracted three times with sodium bicarbonate

(3 x 2 mL) to remove the benzoic acid. The majority of the product was found to dissolve in the aqueous phase, and so the aqueous phase was collected, and concentrated under reduced pressure. The combined organic and aqueous phases were purified by column chromatography (50% EtOAc/CH<sub>2</sub>Cl<sub>2</sub> → 5% MeOH/CH<sub>2</sub>Cl<sub>2</sub>) to yield an amorphous white solid (0.079 g, 93%).

**TLC R<sub>f</sub>**: 0.06 in 50% EtOAc/CH<sub>2</sub>Cl<sub>2</sub>; 0.53 in 10% MeOH/CH<sub>2</sub>Cl<sub>2</sub>.

**<sup>1</sup>H NMR (400 MHz, CDCl<sub>3</sub>)**: δ 10.63 (s, 1H), 5.91 (br. s, 1H), 3.74 (s, 1H), 3.68-3.56 (m, 4H), 2.50 (t, *J* = 6.9 Hz, 2H), 1.81-1.72 (m, 2H), 1.27-1.20 (m, 3H).

**<sup>13</sup>C NMR (100 MHz, CDCl<sub>3</sub>)**: δ 154.2 (C), 122.6 (C), 106.3 (CH), 60.9 (CH<sub>2</sub>), 37.8 (CH<sub>2</sub>), 31.8 (CH<sub>2</sub>), 21.7 (CH<sub>2</sub>), 14.9 (CH<sub>3</sub>).

**IR (FTIR)**: 3271, 2962, 1683, 1428, 1351, 1242, 1047 cm<sup>-1</sup>.

**HRMS (EI) m/z**: Despite multiple attempts to obtain an accurate mass using both ESI and EI, one could not be obtained for this compound. However, C<sup>13</sup> peaks at 122.6 and 106.3 ppm align with known structures and provides solid evidence for structural assignment. Moreover, this product is formed in analogy to **2m**, **2n** and **2x**.

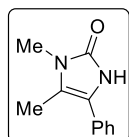

**1,5-Dimethyl-4-phenyl-1H-imidazol-2(3H)-one (2m)**: The title compound was synthesized according to general procedure **G** using 1-(2-hydroxy-2-phenylethyl)-3-((4-methoxybenzoyl)oxy)-1-methylurea (0.167 g, 0.500 mmol), tris(2,2'-bipyridine)ruthenium(II) hexafluorophosphate (0.009 g, 2 mol%), triethylamine (0.056 g, 0.55 mmol) in MeCN (2.5 mL, 0.2 M) in a 8 mL Kimax glass vial with a Teflon screw cap and a stir bar. The vial was placed in an ice bath and purged with Argon for 10 min. The vial was positioned between 2 and 4 cm from the light source (blue LED strips) and allowed to stir overnight at ambient temperature. Upon completion, the product precipitated from solution and was collected by filtration to yield an amorphous white solid (0.047 g, 50%) the filtrate was evaporated to reveal product in solution which could be purified by silica column chromatography (50% EtOAc/CH<sub>2</sub>Cl<sub>2</sub> → 5% CH<sub>3</sub>OH/CH<sub>2</sub>Cl<sub>2</sub>) (0.020 g, 18%). The combined isolated yield is therefore 0.067 g, 71%.

**<sup>1</sup>H NMR (400 MHz, CDCl<sub>3</sub>)**: δ 9.71 (s, 1H), 7.32 (d, *J* = 39.5 Hz, 6H), 3.24 (s, 3H), 2.22 (s, 3H).

**<sup>13</sup>C NMR (100 MHz, CDCl<sub>3</sub>)**: δ 154.4 (C), 131.0 (C), 129.1 (CH), 127.0 (CH), 126.5 (CH), 117.7 (C), 116.4 (C), 27.2 (CH<sub>3</sub>), 9.8 (CH<sub>3</sub>)

The <sup>1</sup>H NMR and <sup>13</sup>C NMR is in agreement with previous reports.<sup>19</sup>

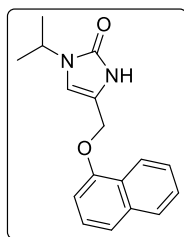

**1-Ethyl-4-((naphthalen-1-yloxy)methyl)-1H-imidazol-2(3H)-one (2n)**: The title compound was synthesized according to general procedure **G** using 1-(2-hydroxy-3-(naphthalen-1-yloxy)propyl)-1-isopropyl-3-((4-methoxybenzoyl)oxy)urea (0.158 g, 0.350 mmol), tris(2,2'-bipyridine)ruthenium(II) hexafluorophosphate (0.006 g, 2 mol%), triethylamine (0.039 g, 0.385 mmol) in MeCN (1.75 mL, 0.2 M) in a 8 mL Kimax glass vial with a Teflon screw cap and a stir bar. The vial was placed in an ice bath and purged with Argon for 10 min. The vial was positioned between 2 and 4 cm from the light source (blue LED strips) and allowed to stir overnight at ambient temperature. Upon completion, the product precipitated from solution and was collected by filtration to yield an amorphous white solid (0.035 g, 35%).

<sup>19</sup> Holzmann, G.; Krieg, B.; Lautenschläger, H.; Konieczny, P. *J. Heterocycl. Chem.* **1979**, *16*, 983-985.

**TLC R<sub>f</sub>:** 0.07 in 50% EtOAc/CH<sub>2</sub>Cl<sub>2</sub>; 0.45 in 5% MeOH/CH<sub>2</sub>Cl<sub>2</sub>.

**<sup>1</sup>H NMR (600 MHz, DMSO-*d*<sub>6</sub>):** δ 10.36-10.35 (m, 1H), 8.17-8.15 (m, 1H), 7.88-7.86 (m, 1H), 7.54-7.43 (m, 5H), 7.09-7.08 (m, 1H), 6.78-6.78 (m, 1H), 4.92 (d, *J* = 5.4 Hz, 2H), 4.19 (dt, *J* = 0.8, 0.4 Hz, 1H), 1.25-1.21 (m, 6H).

**<sup>13</sup>C NMR (151 MHz, DMSO-*d*<sub>6</sub>):** δ 154.0 (C), 153.4 (C), 134.5 (C), 127.9 (CH), 127.0 (CH), 126.6 (CH), 125.7 (CH), 125.5 (C), 122.3 (CH), 120.7 (CH), 116.7 (C), 108.8 (CH), 106.2 (CH), 62.1 (CH<sub>2</sub>), 43.7 (CH), 22.3 (CH<sub>3</sub>).

**IR (FTIR):** 3292, 3227, 2952, 2878, 1681, 1577, 1491, 1453, 1394 cm<sup>-1</sup>.

**HRMS (EI) m/z:** Exact mass calcd for C<sub>17</sub>H<sub>18</sub>N<sub>2</sub>O<sub>2</sub> [M]<sup>+</sup>: 282.1368. Found: 282.1378.

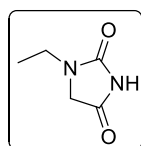

**1-Ethylimidazolidine-2,4-dione (2o):** The title compound was synthesized according to general procedure **G** using 1-(2,2-dimethoxyethyl)-1-ethyl-3-((4-methoxybenzoyl)oxy)urea (0.148 g, 0.500 mmol), tris(2,2'-bipyridine)ruthenium(II) hexafluorophosphate (0.009 g, 2 mol%), triethylamine (0.056 g, 0.55 mmol) in MeCN (2.5 mL, 0.2 M) in a 8 mL Kimax glass vial with a Teflon screw cap and a stir bar. The vial was placed in an ice bath and purged with Argon for 10 min. The vial was positioned between 2 and 4 cm from the light source (blue LED strips) and allowed to stir overnight at ambient temperature. Upon completion, the reaction was concentrated under reduced pressure and then purified by column chromatography (50% EtOAc/CH<sub>2</sub>Cl<sub>2</sub> → 5% CH<sub>3</sub>OH/ CH<sub>2</sub>Cl<sub>2</sub>) to yield an amorphous white solid (0.055 g, 86%).

**<sup>1</sup>H NMR (400 MHz, CDCl<sub>3</sub>):** δ 8.46 (s, 1H), 3.91 (s, 2H), 3.43 (q, *J* = 7.3 Hz, 2H), 1.19 (t, *J* = 7.3 Hz, 3H).

**<sup>13</sup>C NMR (100 MHz, CDCl<sub>3</sub>):** δ 170.4 (C), 156.0 (C), 50.2 (CH<sub>2</sub>), 37.2 (CH<sub>2</sub>), 12.9 (CH<sub>3</sub>).

The <sup>1</sup>H NMR and <sup>13</sup>C NMR is in agreement with previous reports.<sup>20</sup>

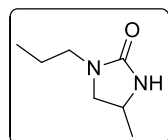

**4-Methyl-1-propylimidazolidin-2-one (2p):** The title compound was synthesized according to general procedure **G** using 3-((4-methoxybenzoyl)oxy)-1,1-dipropylurea (0.147 g, 0.500 mmol), tris(2,2'-bipyridine)ruthenium(II) hexafluorophosphate (0.009 g, 2 mol%), triethylamine (0.059 g, 0.55 mmol) in MeCN (2.5 mL, 0.2 M) in a 8 mL Kimax glass vial with a Teflon screw cap and a stir bar. The vial was placed in an ice bath and purged with Argon for 10 min. The vial was positioned between 2 and 4 cm from the light source (blue LED strips) and allowed to stir overnight at ambient temperature. Upon completion, the reaction was concentrated under reduced pressure, diluted in CH<sub>2</sub>Cl<sub>2</sub> (5.0 mL) and extracted three times with sodium bicarbonate (3 x 2 mL) to remove the benzoic acid. The organic phase was collected, dried with Na<sub>2</sub>SO<sub>4</sub>, filtered, and concentrated under reduced pressure. The title compound was purified by column chromatography (50% EtOAc/CH<sub>2</sub>Cl<sub>2</sub>) to yield an amorphous white solid (0.065 g, 92%).

**TLC R<sub>f</sub>:** 0.15 in 2% MeOH/CH<sub>2</sub>Cl<sub>2</sub>.

**<sup>1</sup>H NMR (400 MHz, CDCl<sub>3</sub>):** δ 5.13-4.23 (br s, 1H), 3.84-3.68 (m, 1H), 3.50 (t, *J* = 8.5 Hz, 1H), 3.25 – 3.01 (m, 2H), 2.94 (dd, *J* = 8.5, 6.3 Hz, 1H), 1.50 (h, *J* = 7.4 Hz, 1H), 1.22 (d, *J* = 6.1 Hz, 3H), 0.89 (t, *J* = 7.4 Hz, 3H).

<sup>20</sup> Sigachev, A. S.; Kravchenko, A. N.; Belyakov, P. A.; Lebedev, O. V.; Makhova N. N. *Russ. Chem. Bull.* **2006**, 55, 865-872.

**$^{13}\text{C}$  NMR (100 MHz,  $\text{CDCl}_3$ ):**  $\delta$  162.2 (C), 52.3 (CH), 45.6 ( $\text{CH}_2$ ), 45.0 ( $\text{CH}_2$ ), 21.6 ( $\text{CH}_2$ ), 20.9 ( $\text{CH}_3$ ), 11.3 ( $\text{CH}_3$ ).

**IR (FTIR):** 3327, 2973, 2866, 1666, 1381, 1045  $\text{cm}^{-1}$ .

**HRMS (EI) m/z:** Exact mass calcd for  $\text{C}_7\text{H}_{14}\text{N}_2$   $[\text{M}]^+$ : 142.1106. Found: 142.1124.

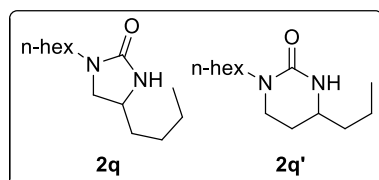

**1-Hexyl-4-butyl-imidazol-2-one (2q) and 1-hexyl-4-propyltetrahydropyrimidin-2(1H)-one (2q')**: The title compound was synthesized according to general procedure **G** using 3-((4-methoxybenzoyl)oxy)-1,1-dihexylurea (0.189 g, 0.500 mmol), tris(2,2'-bipyridine)ruthenium(II) hexafluorophosphate (0.009 g, 2 mol%), triethylamine (0.059 g, 0.55 mmol) in MeCN (2.5 mL, 0.2

M) in a 8 mL Kimax glass vial with a Teflon screw cap and a stir bar. The vial was placed in an ice bath and purged with Argon for 10 min. The vial was positioned between 2 and 4 cm from the light source (blue LED strips) and allowed to stir overnight at ambient temperature. Upon completion, the reaction was concentrated under reduced pressure, diluted in  $\text{CH}_2\text{Cl}_2$  (5.0 mL) and extracted three times with sodium bicarbonate (3 x 2 mL) to remove the benzoic acid. The organic phase was collected, dried with  $\text{Na}_2\text{SO}_4$ , filtered, and concentrated under reduced pressure. The title compounds were purified by column chromatography (97:2:1  $\text{CH}_2\text{Cl}_2$ /iPrOH/AcOH) to yield an inseparable mixture as a colourless oil (0.051 g, 72%).

**TLC R<sub>f</sub>:** 0.18 in 2% MeOH/ $\text{CH}_2\text{Cl}_2$ .

**$^1\text{H}$  NMR (400 MHz,  $\text{CDCl}_3$ ):**  $\delta$  6.50-6.40 (br s, 1H), 6.08-5.99 (br s, 1H), 3.53-3.26 (m, 3H), 3.21-2.90 (m, 3H), 2.89-2.83 (m, 1H), 1.47-1.14 (m, 1H), 0.90-0.81 (m, 8H).

Compound **2q**:  **$^{13}\text{C}$  NMR (100 MHz,  $\text{DMSO}-d_6$ ):**  $\delta$  161.3 (C), 49.9 ( $\text{CH}_2$ ), 49.1 (CH), 42.5 ( $\text{CH}_2$ ), 35.3 ( $\text{CH}_2$ ), 30.9 ( $\text{CH}_2$ ), 27.0 ( $\text{CH}_2$ ), 25.9 ( $\text{CH}_2$ ), 22.1 ( $\text{CH}_2$ ), 22.0 ( $\text{CH}_2$ ), 22.0 ( $\text{CH}_2$ ), 13.9 ( $\text{CH}_3$ ), 13.9 ( $\text{CH}_3$ ).

Compound **2q'**:  **$^{13}\text{C}$  NMR (100 MHz,  $\text{DMSO}-d_6$ ):**  $\delta$  155.1 (C), 49.8 (CH), 46.2 ( $\text{CH}_2$ ), 43.3 ( $\text{CH}_2$ ), 37.8 ( $\text{CH}_2$ ), 31.1 ( $\text{CH}_2$ ), 28.1 ( $\text{CH}_2$ ), 27.3 ( $\text{CH}_2$ ), 27.1 ( $\text{CH}_2$ ), 26.0 ( $\text{CH}_2$ ), 18.0 ( $\text{CH}_2$ ), 14.0 ( $\text{CH}_3$ ). (one carbon is missing due to overlap with compound A).

**IR (FTIR):** 3213, 2956, 2923, 2856, 1687, 1449, 1261  $\text{cm}^{-1}$ .

**HRMS (EI) m/z:** Exact mass calcd for  $\text{C}_{13}\text{H}_{26}\text{N}_2\text{O}$   $[\text{M}]^+$ : 226.2045. Found: 226.2030.

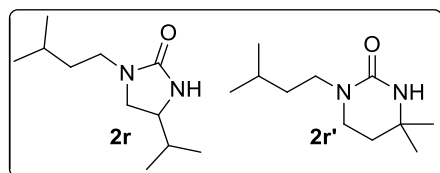

**1-Isopentyl-4-isopropylimidazolidin-2-one (2r) and 1-isopentyl-4-isopropylimidazolidin-2-one (2r')**: The title compound was synthesized according to general procedure **G** using 1,1-diisopentyl-3-((4-methoxybenzoyl)oxy)urea (0.175 g, 0.500 mmol), tris(2,2'-bipyridine)ruthenium(II) hexafluorophosphate (0.009 g, 2 mol%), triethylamine (0.056 g, 0.55 mmol) in MeCN (2.5 mL, 0.2 M)

in a 8 mL Kimax glass vial with a Teflon screw cap and a stir bar. The vial was placed in an ice bath and purged with Argon for 10 min. The vial was positioned between 2 and 4 cm from the light source (blue LED strips) and allowed to stir overnight at ambient temperature. Upon completion, the reaction was concentrated under reduced pressure, diluted in  $\text{CH}_2\text{Cl}_2$  (5.0 mL) and extracted three times with sodium bicarbonate (3 x 2 mL) to remove the benzoic acid. The organic phase was collected, dried with

Na<sub>2</sub>SO<sub>4</sub>, filtered, and concentrated under reduced pressure. The title compounds were purified by column chromatography (96:3:1 CH<sub>2</sub>Cl<sub>2</sub>/iPrOH/AcOH) to yield an inseparable mixture as a colourless oil (0.078 g, 79%).

**TLC R<sub>f</sub>:** 0.51 in 50% EtOAc/CH<sub>2</sub>Cl<sub>2</sub>.

**<sup>1</sup>H NMR (300 MHz, DMSO-*d*<sub>6</sub>):** δ 6.55-6.50 (br s, 1H), 6.08-6.02 (br s, 1H), 3.29-2.88 (m, 10H), 1.66-1.58 (m, 2H), .56-1.41 (m, 4H), 1.38-1.22 (m, 6H), 1.09 (s, 6H), 0.91-0.77 (m, 27H).

**<sup>13</sup>C (100 MHz, DMSO-*d*<sub>6</sub>):** δ 161.4 (C), 154.7 (C), 54.9 (CH), 49.3 (C), 47.8 (CH<sub>2</sub>), 44.4 (CH<sub>2</sub>), 41.5 (CH<sub>2</sub>), 40.8 (CH<sub>2</sub>), 36.0 (CH<sub>2</sub>), 35.9 (CH<sub>2</sub>), 34.3 (CH<sub>2</sub>), 32.7 (CH), 29.0 (CH), 25.4 (CH), 25.2 (CH), 22.5 (CH), 22.4 (CH), 22.3 (CH), 18.2 (CH<sub>3</sub>), 17.7 (CH<sub>3</sub>).

**IR (FTIR):** 3210, 2956, 2870, 1685, 1644, 1459, 1261 cm<sup>-1</sup>.

**HRMS (EI) m/z:** Exact mass calcd for C<sub>11</sub>H<sub>22</sub>N<sub>2</sub>O [M]<sup>+</sup>: 198.1732. Found: 198.1716.

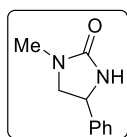

**1-Methyl-4-phenylimidazolidin-2-one (2s):** The title compound was synthesized according to general procedure **G** using 3-((4-methoxybenzoyl)oxy)-1-methyl-1-phenethylurea (0.164 g, 0.500 mmol), tris(2,2'-bipyridine)ruthenium(II) hexafluorophosphate (0.009 g, 2 mol%), triethylamine (0.056 g, 0.55 mmol) in MeCN (2.5 mL, 0.2 M) in a 8 mL Kimax glass vial with a Teflon screw cap and a stir bar. The vial was placed in an ice bath and purged with Argon for 10 min. The vial was positioned between 2 and 4 cm from the light source (blue LED strips) and allowed to stir overnight at ambient temperature. Upon completion, the reaction was concentrated under reduced pressure, diluted in CH<sub>2</sub>Cl<sub>2</sub> (5.0 mL) and extracted three times with sodium bicarbonate (3 x 2 mL) to remove the benzoic acid. The organic phase was collected, dried with Na<sub>2</sub>SO<sub>4</sub>, filtered, and concentrated under reduced pressure. The title compound was purified by column chromatography (40% EtOAc/Hexanes → 100% EtOAc) to yield a white solid (0.067 g, 75%).

**TLC R<sub>f</sub>:** 0.29 in 50% EtOAc/CH<sub>2</sub>Cl<sub>2</sub>.

**<sup>1</sup>H NMR (400 MHz, CDCl<sub>3</sub>):** δ 7.38-7.27 (m, 5H), 4.77 (br. s, 1H), 4.72 (ddd, *J* = 8.8, 7.4, 1.5 Hz, 1H), 3.76 (t, *J* = 8.8 Hz, 1H), 3.20 (dd, *J* = 8.8, 7.4 Hz, 1H), 2.79 (s, 3H).

**<sup>13</sup>C NMR (100 MHz, CDCl<sub>3</sub>):** δ 162.3 (C), 141.7 (C), 129.0 (CH), 128.3 (CH), 126.2 (CH), 56.2 (CH<sub>2</sub>), 53.8 (CH), 30.7 (CH<sub>3</sub>).

**IR (FTIR):** 3198, 3083, 2919, 2852, 1681, 1500, 1440, 1403, 1252 cm<sup>-1</sup>.

**HRMS (EI) m/z:** Exact mass calcd for C<sub>10</sub>H<sub>12</sub>N<sub>2</sub>O [M]<sup>+</sup>: 176.0950. Found: 176.0974.

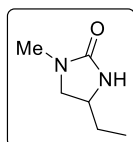

**1-Methyl-4-ethyl-imidazol-2-one (2t):** The title compound was synthesized according to general procedure **G** using 3-((4-methoxybenzoyl)oxy)-1-butyl-1-methylurea (0.140 g, 0.500 mmol), tris(2,2'-bipyridine)ruthenium(II) hexafluorophosphate (0.009 g, 2 mol%), triethylamine (0.056 g, 0.55 mmol) in MeCN (2.5 mL, 0.2 M) in a 8 mL Kimax glass vial with a Teflon screw cap and a stir bar. The vial was placed in an ice bath and purged with Argon for 10 min. The vial was positioned between 2 and 4 cm from the light source (blue LED strips) and allowed to stir overnight at ambient temperature. Upon completion, the reaction was concentrated under reduced pressure, diluted in CH<sub>2</sub>Cl<sub>2</sub> (5.0 mL) and extracted three times with sodium bicarbonate (3 x 2 mL) to remove the benzoic acid. The organic phase was collected, dried with Na<sub>2</sub>SO<sub>4</sub>, filtered,

and concentrated under reduced pressure. The title compound was purified by column chromatography (96:3:1 CH<sub>2</sub>Cl<sub>2</sub>/iPrOH/AcOH) to yield an amorphous white solid (0.032 g, 50%).

**TLC R<sub>f</sub>:** 0.36 in 2% MeOH/CH<sub>2</sub>Cl<sub>2</sub>.

**<sup>1</sup>H NMR (400 MHz, CDCl<sub>3</sub>):** δ 4.64-4.28 (br s, 1H), 3.64-3.46 (m, 2H), 3.03 (dd, *J* = 8, 6.1 Hz, 1H), 2.78 (s, 3H), 1.61-1.56 (m, 2H), 0.93 (t, *J* = 7.4 Hz, 3H).

**<sup>13</sup>C NMR (100 MHz, CDCl<sub>3</sub>):** δ 162.2 (C), 52.9 (CH<sub>2</sub>), 51.1 (CH), 30.5 (CH), 28.6 (CH<sub>2</sub>), 9.6 (CH<sub>3</sub>).

**IR (FTIR):** 3203, 2960, 1683, 1507, 1311, 161, 1231 cm<sup>-1</sup>.

**HRMS (EI) m/z:** Exact mass calcd for C<sub>6</sub>H<sub>12</sub>N<sub>2</sub>O [M]<sup>+</sup>: 128.0950. Found: 128.0946.

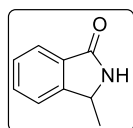

**3-Methylisoindolin-1-one (2u):** The title compound was synthesized according to general procedure **G** using 2-ethyl-N-((4-methoxybenzoyl)oxy)benzamide (0.150 g, 0.50 mmol), tris(2,2'-bipyridine)ruthenium(II) hexafluorophosphate (0.009 g, 2 mol%), tetrabutylammonium dibutyl phosphate (0.011 g, 5 mol%) in CH<sub>2</sub>Cl<sub>2</sub> (2.5 mL, 0.2 M) in a 8 mL Kimax glass vial with a Teflon screw cap and a stir bar. The vial was placed in an ice bath and purged with Argon for 10 min. The vial was positioned between 2 and 4 cm from the light source (blue LED strips) and allowed to stir overnight at ambient temperature. Upon completion, the reaction was diluted in CH<sub>2</sub>Cl<sub>2</sub> (5.0 mL) and extracted three times with sodium bicarbonate (3 x 2 mL) to remove the benzoic acid. The organic phase was collected, dried with Na<sub>2</sub>SO<sub>4</sub>, filtered, and concentrated under reduced pressure. The title compound was purified by column chromatography (50% EtOAc/CH<sub>2</sub>Cl<sub>2</sub>) to yield an amorphous white solid (0.048 g, 65%).

**<sup>1</sup>H NMR (300 MHz, CDCl<sub>3</sub>):** δ 7.85 (dt, *J* = 7.5, 1.0 Hz, 1H), 7.58 (td, *J* = 7.5, 1.2 Hz, 1H), 7.52 – 7.40 (m, 2H), 6.73-6.57 (br s, 1H), 4.70 (q, *J* = 6.7 Hz, 1H), 1.51 (d, *J* = 6.7 Hz, 3H).

**<sup>13</sup>C NMR (100 MHz, CDCl<sub>3</sub>):** δ 170.7 (C), 149.0 (C), 132.1 (CH), 131.6 (C), 128.3 (CH), 124.0 (CH), 122.3 (CH), 52.6 (CH), 20.5 (CH<sub>3</sub>).

The <sup>1</sup>H NMR and <sup>13</sup>C NMR is in agreement with previous reports.<sup>14</sup>

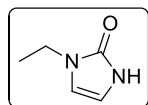

**1-Ethyl-1H-imidazol-2(3H)-one (2v):** The title compound was synthesized according to general procedure **G** using 1-ethyl-1-(2-hydroxyethyl)-3-((4-methoxybenzoyl)oxy)urea (0.141 g, 0.500 mmol), tris(2,2'-bipyridine)ruthenium(II) hexafluorophosphate (0.009 g, 2 mol%), triethylamine (0.056 g, 0.55 mmol) in MeCN (2.5 mL, 0.2 M) in a 8 mL Kimax glass vial with a Teflon screw cap and a stir bar. The vial was placed in an ice bath and purged with Argon for 10 min. The vial was positioned between 2 and 4 cm from the light source (blue LED strips) and allowed to stir overnight at ambient temperature. Upon completion, the reaction was concentrated under reduced pressure, diluted in CH<sub>2</sub>Cl<sub>2</sub> (5.0 mL) and extracted three times with sodium bicarbonate (3 x 2 mL) to remove the benzoic acid. The organic phase was collected, dried with Na<sub>2</sub>SO<sub>4</sub>, filtered, and concentrated under reduced pressure. The title compound was purified by column chromatography (50% EtOAc/CH<sub>2</sub>Cl<sub>2</sub> → 5% MeOH/CH<sub>2</sub>Cl<sub>2</sub>) to yield a white solid (0.028 g, 50%).

**TLC R<sub>f</sub>:** 0.07 in 50% EtOAc/CH<sub>2</sub>Cl<sub>2</sub>; 0.45 in 5% MeOH/CH<sub>2</sub>Cl<sub>2</sub>.

**<sup>1</sup>H NMR (400 MHz, CDCl<sub>3</sub>):** δ 9.89 (s, 1H), 6.29 (t, *J* = 2.6 Hz, 1H), 6.20 (t, *J* = 2.5 Hz, 1H), 3.67 (q, *J* = 7.3 Hz, 2H), 1.30 (t, *J* = 7.3 Hz, 4H).



**$^{13}\text{C}$  NMR (100 MHz,  $\text{CDCl}_3$ ):**  $\delta$  154.3 (C), 110.8 (CH), 108.0 (CH), 37.9 ( $\text{CH}_2$ ), 14.8 ( $\text{CH}_3$ ).

**IR (FTIR):** 3200, 2929, 1663, 1455, 1258, 1088  $\text{cm}^{-1}$ .

**HRMS (EI) m/z:** Exact mass calcd for  $\text{C}_5\text{H}_8\text{N}_2\text{O}$   $[\text{M}]^+$ : 112.0637. Found: 112.0618.

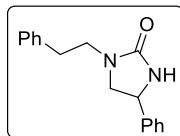

**Phenethyl-4-phenylimidazolidin-2-one (2w):** The title compound was synthesized according to general procedure **G** using 3-((4-methoxybenzoyl)oxy)-1,1-diphenethylurea (0.209 g, 0.500 mmol), tris(2,2'-bipyridine)ruthenium(II) hexafluorophosphate (0.009 g, 2 mol%), triethylamine (0.056 g, 0.55 mmol) in MeCN (2.5 mL, 0.2 M) in a 8 mL Kimax glass vial with a Teflon screw cap and a stir bar. The vial was placed in an ice bath and purged with Argon for 10 min. The vial was positioned between 2 and 4 cm from the light source (blue LED strips) and allowed to stir overnight at ambient temperature. Upon completion, the reaction was concentrated under reduced pressure, diluted in  $\text{CH}_2\text{Cl}_2$  (5.0 mL) and extracted three times with sodium bicarbonate (3 x 2 mL) to remove the benzoic acid. The organic phase was collected, dried with  $\text{Na}_2\text{SO}_4$ , filtered, and concentrated under reduced pressure. The title compound was purified by column chromatography (40% EtOAc/Hexanes) to yield a white solid (0.100 g, 75%).

**TLC  $R_f$ :** 0.50 in 50% EtOAc/ $\text{CH}_2\text{Cl}_2$ .

**$^1\text{H}$  NMR (400 MHz,  $\text{CDCl}_3$ ):**  $\delta$  7.37-7.19 (m, 10H), 4.73 (br. s, 1H), 4.68 (ddd,  $J$  = 8.8, 7.1, 1.4 Hz, 1H), 3.68 (t,  $J$  = 8.8 Hz, 1H), 3.56-3.43 (m, 2H), 3.14 (dd,  $J$  = 8.8, 7.1 Hz, 1H), 2.85 (t,  $J$  = 7.1 Hz, 2H).

**$^{13}\text{C}$  NMR (100 MHz,  $\text{CDCl}_3$ ):**  $\delta$  161.7 (C), 141.7 (C), 139.0 (C), 129.0 (CH), 128.9 (C), 128.6 (CH), 128.3 (CH), 126.5 (CH), 126.2 (CH), 54.2 ( $\text{CH}_2$ ), 53.9 (CH), 44.9 ( $\text{CH}_2$ ), 34.5 ( $\text{CH}_2$ ).

**IR (FTIR):** 3216, 3083, 3028, 2917, 2854, 1680, 1490, 1452, 1360, 1318, 1255  $\text{cm}^{-1}$ .

**HRMS (EI) m/z:** Exact mass calcd for  $\text{C}_{17}\text{H}_{18}\text{N}_2\text{O}$   $[\text{M}]^+$ : 266.1419. Found: 233.1431.

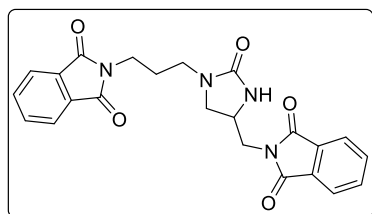

**2-(3-(4-((1,3-Dioxoisindolin-2-yl)methyl)-2-oxoimidazolidin-1-yl)propyl)isoindoline-1,3-dione (2x):** The title compound was synthesized according to general procedure **G** using 1,1-bis(3-(1,3-dioxoisindolin-2-yl)propyl)-3-((4-methoxybenzoyl)oxy)urea (0.292 g, 0.500 mmol), tris(2,2'-bipyridine)ruthenium(II) hexafluorophosphate (0.009 g, 2 mol%), triethylamine (0.056 g, 0.55 mmol) in MeCN (2.5 mL, 0.2 M) in a 8 mL Kimax glass vial with a Teflon screw cap and a stir bar. The vial was placed in an ice bath and purged with Argon for 10 min. The vial was positioned between 2 and 4 cm from the light source (blue LED strips) and allowed to stir overnight at ambient temperature. Upon completion, the reaction was concentrated under reduced pressure, diluted in  $\text{CH}_2\text{Cl}_2$  (5.0 mL) and extracted three times with sodium bicarbonate (3 x 2 mL) to remove the benzoic acid. The organic phase was collected, dried with  $\text{Na}_2\text{SO}_4$ , filtered, and concentrated under reduced pressure. The title compound was purified by column chromatography (50% EtOAc/ $\text{CH}_2\text{Cl}_2$   $\rightarrow$  100% EtOAc) to yield a white solid (0.078 g, 36%).

**TLC  $R_f$ :** 0.16 in 50% EtOAc/ $\text{CH}_2\text{Cl}_2$ .

**$^1\text{H}$  NMR (400 MHz,  $\text{CDCl}_3$ ):**  $\delta$  7.82 (ddd,  $J$  = 13.4, 5.5, 3.0 Hz, 4H), 7.70 (ddd,  $J$  = 14.6, 5.5, 3.0 Hz, 4H), 4.74 (s, 1H), 3.98 (dq,  $J$  = 9.0, 4.8 Hz, 1H), 3.90 (dd,  $J$  = 14.0, 5.8 Hz, 1H), 3.78 (dd,  $J$  = 14.0, 4.7 Hz, 1H), 3.68 (td,  $J$  = 7.3, 3.2 Hz, 2H), 3.56 (t,  $J$  = 8.8 Hz, 1H), 3.34 (dd,  $J$  = 9.0, 5.6 Hz, 1H), 3.25-3.12 (m, 2H).

**$^{13}\text{C}$  NMR (100 MHz,  $\text{CDCl}_3$ ):**  $\delta$  168.5 (C), 138.2 (C), 161.1 (C), 134.3 (CH), 133.9 (CH), 131.1 (C), 131.7 (C), 123.6 (CH), 123.2 (CH), 49.3 (CH), 48.6 ( $\text{CH}_2$ ), 41.1 ( $\text{CH}_2$ ), 40.9 ( $\text{CH}_2$ ), 35.4 ( $\text{CH}_2$ ), 26.6 ( $\text{CH}_2$ ).

**IR (FTIR):** 3200, 2864, 1693, 1387, 1258, 1027  $\text{cm}^{-1}$ .

**HRMS (ESI) m/z:** Exact mass calcd for  $\text{C}_{23}\text{H}_{20}\text{N}_4\text{O}_5\text{Na}$   $[\text{M}+\text{Na}]^+$ : 455.1325. Found: 455.1331.

### Aziridination

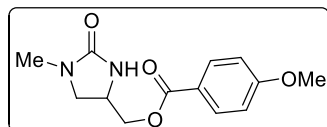

**(1-Methyl-2-oxoimidazolidin-4-yl)methyl 4-methoxybenzoate (2y):**

The title compound was synthesized according to general procedure **G** using 1-allyl-3-((4-methoxybenzoyl)oxy)-1-methylurea (0.132 g, 0.50 mmol), tris(2,2'-bipyridine)ruthenium(II) hexafluorophosphate (0.009 g, 2 mol%), triethylamine (0.057 g, 0.55 mmol) in  $\text{CH}_2\text{Cl}_2$  (5.0 mL, 0.2 M) in a 8 mL Kimax glass vial with a Teflon screw cap and a stir bar. The vial was placed in an ice bath and purged with Argon for 10 min. The vial was positioned between 2 and 4 cm from the light source (blue LED strips) and allowed to stir overnight at ambient temperature. Upon completion, the reaction was concentrated under reduced pressure, diluted in  $\text{CH}_2\text{Cl}_2$  (5.0 mL) and extracted three times with sodium bicarbonate (3 x 2 mL). The organic phase was collected, dried with  $\text{Na}_2\text{SO}_4$ , filtered, and concentrated under reduced pressure. The title compound was purified by column chromatography (50% EtOAc/ $\text{CH}_2\text{Cl}_2 \rightarrow$  30% EtOAc/ $\text{CH}_2\text{Cl}_2$ ) to yield a white solid (0.089 g, 66%).

**TLC  $R_f$ :** 0.51 in 2% MeOH/ $\text{CH}_2\text{Cl}_2$

**$^1\text{H}$  NMR (400 MHz,  $\text{CDCl}_3$ ):**  $\delta$  8.01-7.94 (m, 2H), 6.97-6.91 (m, 2H), 4.68-4.58 (br s, 1H), 4.41-4.35 (dd,  $J$  = 11.1, 4.8 Hz, 1H), 4.26-4.20 (dd,  $J$  = 11.2, 7.1 Hz, 1H), 4.09-4.00 (m, 1H), 3.88 (s, 3H), 3.62 (t,  $J$  = 9.0 Hz, 3H), 3.26 (dd,  $J$  = 9.0, 5.5 Hz, 1H), 2.79 (s, 3H).

**$^{13}\text{C}$  NMR (100 MHz,  $\text{CDCl}_3$ ):**  $\delta$  165.9 (C), 163.7 (C), 161.5 (C), 131.7 (CH), 121.8 (C), 113.8 (CH), 66.2 ( $\text{CH}_2$ ), 55.5 (CH), 49.8 ( $\text{CH}_2$ ), 48.4 (CH), 30.5 ( $\text{CH}_3$ ).

**IR (FTIR):** 3200, 2942, 2866, 1699, 1600, 1444, 1252  $\text{cm}^{-1}$ .

**HRMS (ESI) m/z:** Exact mass calcd for  $\text{C}_{11}\text{H}_{14}\text{N}_2\text{O}_2\text{Na}$   $[\text{M}+\text{Na}]^+$ : 287.1008. Found: 287.1003.

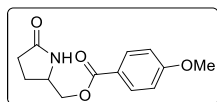

**(5-Oxopyrrolidin-2-yl)methyl 4-methoxybenzoate (2z):**

The title compound was synthesized according to general procedure **G** using *N*-((4-methoxybenzoyl)oxy)pent-4-enamide (0.249 g, 1.00 mmol), tris(2,2'-bipyridine)ruthenium(II) hexafluorophosphate (0.017 g, 2 mol%), tetrabutylammonium dibutyl phosphate (0.022 g, 5 mol%) in  $\text{CH}_2\text{Cl}_2$  (5.0 mL, 0.2 M) in a 8 mL Kimax glass vial with a Teflon screw cap and a stir bar. The vial was placed in an ice bath and purged with Argon for 10 min. The vial was positioned between 2 and 4 cm from the light source (blue LED strips) and allowed to stir overnight at ambient temperature. Upon completion, the reaction was concentrated under reduced pressure, diluted in  $\text{CH}_2\text{Cl}_2$  (5.0 mL) and extracted three times with sodium bicarbonate (3 x 2 mL). The organic phase was collected, dried with  $\text{Na}_2\text{SO}_4$ , filtered, and concentrated under reduced pressure. The title compound was purified by column chromatography (50% EtOAc/ $\text{CH}_2\text{Cl}_2 \rightarrow$  100% EtOAc) to yield a white solid (0.169 g, 68%).

**TLC  $R_f$ :** 0.12 in 50% EtOAc/ $\text{CH}_2\text{Cl}_2$ .

**<sup>1</sup>H NMR (400 MHz, CDCl<sub>3</sub>):**  $\delta$  7.95 (d,  $J$  = 9.0 Hz, 2H), 6.90 (d,  $J$  = 9.0 Hz, 2H), 6.12 (br s, 1H), 4.40 (dd,  $J$  = 11.2, 3.7 Hz, 1H), 4.11 (dd,  $J$  = 11.2, 7.2 Hz, 1H), 4.04-3.98 (m, 1H), 3.84 (s, 3H), 2.45-2.26 (m, 3H), 1.95-1.86 (m, 1H).

**<sup>13</sup>C NMR (100 MHz, CDCl<sub>3</sub>):**  $\delta$  177.9 (C), 166.0 (C), 163.7 (C), 131.7 (CH), 121.8 (C), 113.8 (CH), 67.2 (CH<sub>2</sub>), 55.5 (CH<sub>3</sub>), 53.0 (CH), 29.5 (CH<sub>2</sub>), 23.4 (CH<sub>2</sub>).

**IR (FTIR):** 3168, 3079, 2965, 2841, 1680, 1605, 1511, 1461, 1383, 1252 cm<sup>-1</sup>.

**HRMS (ESI) m/z:** Exact mass calcd for C<sub>13</sub>H<sub>15</sub>NO<sub>4</sub>Na [M+Na]<sup>+</sup>: 272.0899. Found: 272.0904.

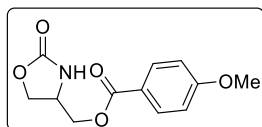

**(2-Oxooxazolidin-4-yl)methyl 4-methoxybenzoate (2aa):** The title compound was synthesized according to general procedure **G** using allyl (4-methoxybenzoyl)oxycarbamate (0.126 g, 0.500 mmol), tris(2,2'-bipyridine)ruthenium(II) hexafluorophosphate (0.009 g, 2 mol%), triethylamine (0.057 g, 0.55 mmol) in CH<sub>2</sub>Cl<sub>2</sub> (5.0 mL, 0.2 M) in a 8 mL Kimax glass vial with a Teflon screw cap and a stir bar. The vial was placed in an ice bath and purged with argon for 10 min. The vial was positioned between 2 and 4 cm from the light source (blue LED strips) and allowed to stir overnight at ambient temperature. Upon completion, the reaction was concentrated under reduced pressure, diluted in CH<sub>2</sub>Cl<sub>2</sub> (5.0 mL) and extracted three times with sodium bicarbonate (3 x 2 mL). The organic phase was collected, dried with Na<sub>2</sub>SO<sub>4</sub>, filtered, and concentrated under reduced pressure. The title compound was purified by column chromatography (50% EtOAc/CH<sub>2</sub>Cl<sub>2</sub> → 100% EtOAc) to yield a white solid (0.065 g, 52%).

**TLC R<sub>f</sub>:** 0.32 in 50% EtOAc/CH<sub>2</sub>Cl<sub>2</sub>.

**<sup>1</sup>H NMR (400 MHz, CDCl<sub>3</sub>):**  $\delta$  7.98 (d,  $J$  = 9.0 Hz, 2H), 6.93 (d,  $J$  = 8.7 Hz, 2H), 5.79 (br s, 1H), 4.59-4.55 (m, 1H), 4.44-4.41 (m, 1H), 4.31-4.22 (m, 3H), 3.87 (s, 3H).

**<sup>13</sup>C NMR (100 MHz, CDCl<sub>3</sub>):**  $\delta$  166.1 (C), 164.0 (C), 159.4 (C), 132.0 (CH), 121.5 (C), 114.0 (CH), 67.2 (CH<sub>2</sub>), 65.3 (CH<sub>2</sub>), 55.6 (CH<sub>3</sub>), 51.5 (CH).

**IR (FTIR):** 3277, 2941, 2840, 1750, 1706, 1603, 1580, 1511, 1417, 1281, 1251 cm<sup>-1</sup>.

**HRMS (EI) m/z:** Exact mass calcd for C<sub>12</sub>H<sub>13</sub>NO<sub>5</sub> [M]<sup>+</sup>: 251.0794. Found: 251.0799.

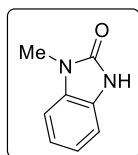

**1-Methyl-1H-benzo[d]imidazol-2(3H)-one (2ab):** The title compound was synthesized following general procedure **G** using 3-((4-methoxybenzoyl)oxy)-1-methyl-1-phenylurea (0.240 g, 0.800 mmol), tris(2,2'-bipyridine)ruthenium(II) hexafluorophosphate (0.014 g, 2 mol%), triethylamine (0.089 g, 0.88 mmol) in MeCN (4.0 mL, 0.2 M) in a 8 mL Kimax glass vial with a Teflon screw cap and a stir bar. The vial was placed in an ice bath and purged with Argon for 10 min. The vial was positioned between 2 and 4 cm from the light source (blue LED strips) and allowed to stir overnight at ambient temperature. Upon completion, the reaction was concentrated under reduced pressure, diluted in CH<sub>2</sub>Cl<sub>2</sub> (5.0 mL) and extracted three times with sodium bicarbonate (3 x 2 mL) to remove the benzoic acid. The organic phase was collected, dried with Na<sub>2</sub>SO<sub>4</sub>, filtered, and concentrated under reduced pressure. The title compound was purified by column chromatography (10% EtOAc/Hexanes → 50% EtOAc/Hexanes) to yield a white solid (0.085 g, 72%).

**<sup>1</sup>H NMR (400 MHz, CDCl<sub>3</sub>):**  $\delta$  9.94 (s, 1H), 7.11-7.05 (m, 3H), 6.98-6.95 (m, 1H), 3.42 (s, 3H).

**<sup>13</sup>C NMR (100 MHz, CDCl<sub>3</sub>):** δ 156.0 (C), 131.1 (C), 128.0 (C), 121.8 (CH), 121.5 (CH), 109.7 (CH), 107.8 (CH), 27.0 (CH<sub>3</sub>).

The <sup>1</sup>H NMR and <sup>13</sup>C NMR is in agreement with previous reports.<sup>21</sup>

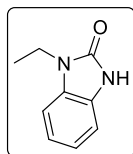

**1-Ethyl-1,3-dihydro-benzoimidazol-2-one (2ac):** The title compound was synthesized according to general procedure **G** using 3-((4-methoxybenzoyl)oxy)-1-ethyl-1-phenylurea (0.157 g, 0.500 mmol), tris(2,2'-bipyridine)ruthenium(II) hexafluorophosphate (0.009 g, 2 mol%), triethylamine (0.056 g, 0.55 mmol) in MeCN (2.5 mL, 0.2 M) in a 8 mL Kimax glass vial with a Teflon screw cap and a stir bar. The vial was placed in an ice bath and purged with Argon for 10 min. The vial was positioned between 2 and 4 cm from the light source (blue LED strips) and allowed to stir overnight at ambient temperature. Upon completion, the reaction was concentrated under reduced pressure, diluted in CH<sub>2</sub>Cl<sub>2</sub> (5.0 mL) and extracted three times with sodium bicarbonate (3 x 2 mL) to remove the benzoic acid. The organic phase was collected, dried with Na<sub>2</sub>SO<sub>4</sub>, filtered, and concentrated under reduced pressure. The title compound was purified by column chromatography (50% EtOAc/CH<sub>2</sub>Cl<sub>2</sub>) to yield an amorphous white solid (0.039 g, 48%).

**<sup>1</sup>H NMR (400 MHz, CDCl<sub>3</sub>):** δ 10.49-10.20 (br s, 1H), 7.19-6.96 (m, 4H), 3.98 (q, *J* = 7.2 Hz, 2H), 1.38 (t, *J* = 7.3 Hz, 3H).

**<sup>13</sup>C NMR (100 MHz, CDCl<sub>3</sub>):** δ 155.5 (C), 130.0 (C), 128.1 (C), 121.4 (CH), 121.2 (CH), 109.7 (CH), 107.7 (CH), 35.6 (CH<sub>2</sub>), 13.6 (CH<sub>3</sub>).

The <sup>1</sup>H NMR and <sup>13</sup>C NMR is in agreement with previous reports.<sup>22</sup>

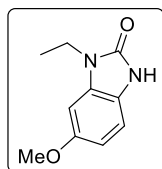

**1-Ethyl-5-methoxy-1H-benzo[d]imidazol-2(3H)-one (2af):** The title compound was synthesized according to general procedure **G** using 1-ethyl-3-((4-methoxybenzoyl)oxy)-1-(3-methoxyphenyl)urea (0.276 g, 0.800 mmol), tris(2,2'-bipyridine)ruthenium(II) hexafluorophosphate (0.014 g, 2 mol%), triethylamine (0.089 g, 0.88 mmol) in MeCN (4.0 mL, 0.2 M) in a 8 mL Kimax glass vial with a Teflon screw cap and a stir bar. The vial was placed in an ice bath and purged with Argon for 10 min. The vial was positioned between 2 and 4 cm from the light source (blue LED strips) and allowed to stir overnight at ambient temperature. Upon completion, the reaction was concentrated under reduced pressure, diluted in CH<sub>2</sub>Cl<sub>2</sub> (5.0 mL) and extracted three times with sodium bicarbonate (3 x 2 mL) to remove the benzoic acid. The organic phase was collected, dried with Na<sub>2</sub>SO<sub>4</sub>, filtered, and concentrated under reduced pressure. The title compound was purified by column chromatography (40% EtOAc/CH<sub>2</sub>Cl<sub>2</sub>) to yield a white solid (0.143 g, 93%).

**TLC R<sub>f</sub>:** 0.33 in 50% EtOAc/CH<sub>2</sub>Cl<sub>2</sub>.

**<sup>1</sup>H NMR (400 MHz, CDCl<sub>3</sub>):** δ 9.57 (d, *J* = 0.3 Hz, 1H), 6.97 (d, *J* = 8.4 Hz, 1H), 6.61 (dd, *J* = 8.4, 2.4 Hz, 1H), 6.58 (d, *J* = 2.4 Hz, 1H), 3.90 (q, *J* = 7.2 Hz, 2H), 3.81 (s, 3H), 1.34 (t, *J* = 7.2 Hz, 3H).

**<sup>13</sup>C NMR (100 MHz, CDCl<sub>3</sub>):** δ 155.9 (C), 155.5 (C), 131.1 (C), 122.2 (C), 109.9 (CH), 106.7 (CH), 95.3 (CH), 56.1 (CH<sub>3</sub>), 35.8 (CH<sub>2</sub>), 13.7 (CH<sub>3</sub>).

**IR (FTIR):** 2978, 2934, 1681, 1629, 1609, 1493, 1447, 1396, 1223, 1081 cm<sup>-1</sup>.

<sup>21</sup> Ando, K.; Kobayashi, T.; Uchida, N. *Org. Lett.* **2015**, *17*, 2554–2557.

<sup>22</sup> Peng, L.; Zhiming, W.; Xianming, H. *Eur. J. Org. Chem.* **2012**, *10*, 1994 – 2000.

**HRMS (EI) m/z:** Exact mass calcd for  $C_{10}H_{12}N_2O_2$   $[M]^+$ : 192.0899. Found: 192.0876.

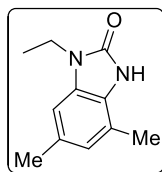

**1-Ethyl-4,6-dimethyl-1H-benzo[d]imidazol-2(3H)-one (2ag):** The title compound was synthesized according to general procedure **G** using 1-(3,5-dimethylphenyl)-1-ethyl-3-((4-methoxybenzoyl)oxy)urea (0.273 g, 0.80 mmol), tris(2,2'-bipyridine)ruthenium(II) hexafluorophosphate (0.014 g, 2 mol%), triethylamine (0.089 g, 0.88 mmol) in MeCN (4.0 mL, 0.2 M) in a 8 mL Kimax glass vial with a Teflon screw cap and a stir bar. The vial was placed in an ice bath and purged with Argon for 10 min. The vial was positioned between 2 and 4 cm from the light source (blue LED strips) and allowed to stir overnight at ambient temperature. Upon completion, the product precipitated out of solution and was collected over a fritted funnel (0.128 g, 84%).

**TLC  $R_f$ :** 0.42 in 50% EtOAc/ $CH_2Cl_2$ .

**$^1H$  NMR (400 MHz,  $CDCl_3$ ):**  $\delta$  10.04 (br s, 1H), 6.68 (s, 1H), 6.65 (s, 1H), 3.90 (q,  $J$  = 7.2 Hz, 2H), 2.36 (s, 3H), 2.35 (s, 3H), 1.33 (t,  $J$  = 7.2 Hz, 3H).

**$^{13}C$  NMR (100 MHz,  $CDCl_3$ ):**  $\delta$  155.7 (C), 130.8 (C), 129.8 (C), 125.0 (C), 123.3 (CH), 119.1 (C), 105.9 (CH), 35.6 ( $CH_2$ ), 21.5 ( $CH_3$ ), 16.2 ( $CH_3$ ), 13.7 ( $CH_3$ ).

**IR (FTIR):** 2978, 1687, 1459, 1396, 1280  $cm^{-1}$ .

**HRMS (EI) m/z:** Exact mass calcd for  $C_{11}H_{14}N_2O$   $[M]^+$ : 190.1106. Found: 190.1120.

#### Site competition experiments

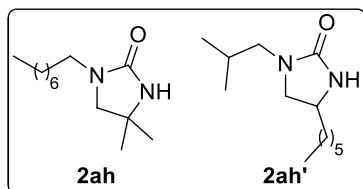

**1-Octyl-4,4-dimethylimidazolidin-2-one (2ah) and 4-hexyl-1-isobutylimidazolidin-2-one (2ah'):** The title compound was synthesized according to general procedure **G** using 3-((4-methoxybenzoyl)oxy)-1-isobutyl-1-octylurea (0.189 g, 0.500 mmol), tris(2,2'-bipyridine)ruthenium(II) hexafluorophosphate (0.009 g, 2 mol%), triethylamine (0.057 g, 0.55 mmol) in MeCN (2.5 mL, 0.2 M) in a 8 mL Kimax glass vial with a Teflon screw cap and a stir bar. The vial was placed in an ice bath and purged with Argon for 10 min. The vial was positioned between 2 and 4 cm from the light source (blue LED strips) and allowed to stir overnight at ambient temperature. Upon completion, the reaction was concentrated under reduced pressure, diluted in  $CH_2Cl_2$  (5.0 mL) and extracted three times with sodium bicarbonate (3 x 2 mL) to remove the benzoic acid. The organic phase was collected, dried with  $Na_2SO_4$ , filtered, and concentrated under reduced pressure. The title compound was purified by column chromatography (30% EtOAc/Hexanes) to yield a colourless oil (0.077 g, 68%).

**TLC  $R_f$ :** 0.48 in 50% EtOAc/ $CH_2Cl_2$ .

#### 1-Octyl-4,4-dimethylimidazolidin-2-one (2ah):

**$^1H$  NMR (400 MHz,  $DMSO-d_6$ ):**  $\delta$  6.36-6.33 (br s, 1H), 3.03-2.97 (m, 4H), 1.42-1.35 (m, 3H, 2aj and 2aj'), 1.30-1.18 (m, 13H, 2aj and 2aj'), 1.15 (s, 6H), 0.85 (app t,  $J$  = 6.9 Hz, 4H, 2aj and 2aj'), 0.81 (app dd,  $J$  = 6.6, 2.4 Hz, 2H, 2aj and 2aj').

**$^{13}C$  NMR (100 MHz,  $DMSO-d_6$ ):**  $\delta$  160.3 (C), 57.1 ( $CH_2$ ), 51.1 (C), 42.2 ( $CH_2$ ), 31.2 ( $CH_2$ ), 28.6 ( $CH_2$ ), 28.6 (CH), 28.0 (CH), 27.0 ( $CH_2$ ), 26.1 ( $CH_2$ ), 22.1 ( $CH_2$ ), 13.9 ( $CH_3$ ).

**4-Hexyl-1-isobutylimidazolidin-2-one (2ah')**:

**<sup>1</sup>H NMR (400 MHz, DMSO-*d*<sub>6</sub>):** δ 6.46-6.44 (br s, 1H), 3.52-3.46 (m, 1H), 3.43-3.38 (m, 2H), 2.89-2.85 (m, 1H), 2.83-2.74 (m, 2H), 1.81-1.71 (m, 1H), 1.42-1.35 (m, 3H, , 2aj and 2aj'), 1.30-1.18 (m, 13H, , 2aj and 2aj'), 0.85 (app t, *J* = 6.9 Hz, 4H, , 2aj and 2aj'), 0.81 (app dd, *J* = 6.6, 2.4 Hz, 2H, , 2aj and 2aj').

**<sup>13</sup>C NMR (100 MHz, DMSO-*d*<sub>6</sub>):** δ 161.4, 50.6, 50.3, 49.1, 35.7, 26.4, 24.7, 22.0, 20.0, 19.9, 13.9 (one carbon is missing due to overlap).

**IR (FTIR):** 3202, 2917, 2852, 1686, 1457, 1303, 1240 cm<sup>-1</sup>.

**HRMS (EI) m/z:** Exact mass calcd for C<sub>13</sub>H<sub>26</sub>N<sub>2</sub>O [M]<sup>+</sup>: 226.2045. Found: 226.2020.

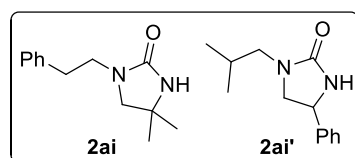**4,4-Dimethyl-1-phenethylimidazolidin-2-one (2ai) and 1-Isobutyl-4-phenylimidazolidin-2-one (2ai')**:

The title compound was synthesized according to general procedure **G** using 1-isobutyl-3-((4-methoxybenzoyl)oxy)-1-phenethylurea (0.185 g, 0.500 mmol), tris(2,2'-bipyridine)ruthenium(II) hexafluorophosphate (0.009 g, 2 mol%), triethylamine (0.056 g, 0.55 mmol) in MeCN (2.5 mL, 0.2 M) in a 8 mL Kimax glass vial with a Teflon screw cap and a stir bar. The vial was placed in an ice bath and purged with Argon for 10 min. The vial was positioned between 2 and 4 cm from the light source (blue LED strips) and allowed to stir overnight at ambient temperature. Upon completion, the reaction was concentrated under reduced pressure, diluted in CH<sub>2</sub>Cl<sub>2</sub> (5.0 mL) and extracted three times with sodium bicarbonate (3 x 2 mL) to remove the benzoic acid. The organic phase was collected, dried with Na<sub>2</sub>SO<sub>4</sub>, filtered, and concentrated under reduced pressure. The title compound was purified by column chromatography (gradient 20% EtOAc/Hexanes → 40% EtOAc/Hexanes) to yield a white solid (0.037 g, 37%).

**4,4-Dimethyl-1-phenethylimidazolidin-2-one (2ai):** as an amorphous white solid (0.037 g, 37%).

**TLC R<sub>f</sub>:** 0.13 in 30% EtOAc/Hexanes.

**<sup>1</sup>H NMR (400 MHz, CDCl<sub>3</sub>):** δ 7.31-7.19 (m, 5H), 4.31 (s, 1H), 3.44 (dd, *J* = 7.9, 6.8 Hz, 2H), 3.02 (s, 2H), 2.83 (t, *J* = 7.4 Hz, 2H), 1.21 (s, 6H).

**<sup>13</sup>C NMR (100 MHz, CDCl<sub>3</sub>):** δ 160.9 (C), 139.3 (C), 128.9 (CH), 128.6 (CH), 126.5 (CH), 58.6 (CH<sub>2</sub>), 52.1 (C), 44.8 (CH<sub>2</sub>), 34.6 (CH<sub>2</sub>), 28.5 (CH<sub>3</sub>).

**IR (FTIR):** 3202, 3069, 2967, 2956, 2857, 1683, 1489, 1452, 1365, 1302 cm<sup>-1</sup>.

**HRMS (EI) m/z:** Exact mass calcd for C<sub>13</sub>H<sub>18</sub>N<sub>2</sub>O [M]<sup>+</sup>: 218.1419. Found: 218.1396.

**1-Isobutyl-4-phenylimidazolidin-2-one (2ai')**: as amorphous white solid (0.059 g, 50%).

**TLC R<sub>f</sub>:** 0.28 in 30% EtOAc/Hexanes.

**<sup>1</sup>H NMR (400 MHz, CDCl<sub>3</sub>):** δ 7.40-7.29 (m, 5H), 4.77-4.73 (m, 2H), 3.79 (t, *J* = 9.0 Hz, 1H), 3.22 (dd, *J* = 8.8, 7.3 Hz, 1H), 3.09-2.95 (m, 2H), 1.82 (dq, *J* = 13.7, 6.9 Hz, 1H), 0.91 (dd, *J* = 6.7, 4.4 Hz, 6H).

**$^{13}\text{C}$  NMR (100 MHz,  $\text{CDCl}_3$ ):**  $\delta$  162.2 (C), 141.9 (C), 129.1 (CH), 128.3 (CH), 126.2 (CH), 54.4 ( $\text{CH}_2$ ), 54.0 (CH), 51.2 ( $\text{CH}_2$ ), 27.1 (CH), 20.16 ( $\text{CH}_3$ ).

**IR (FTIR):** 3200, 3082, 2953, 1682, 1491, 1449,  $1255\text{ cm}^{-1}$ .

**HRMS (EI) m/z:** Exact mass calcd for  $\text{C}_{13}\text{H}_{18}\text{N}_2\text{O}$   $[\text{M}]^+$ : 218.1419. Found: 218.1404.

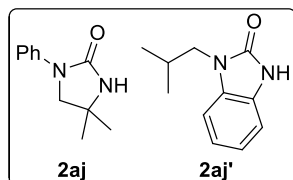

**4,4-Dimethyl-1-phenylimidazolidin-2-one (2aj) and 1-isobutyl-1,3-dihydro-2H-benzo[d]imidazol-2-one (2aj'):** The title compound was synthesized according to general procedure **G** using 3-((4-methoxybenzoyl)oxy)-1-isobutyl-1-phenylurea (0.171 g, 0.500 mmol), tris(2,2'-bipyridine)ruthenium(II) hexafluorophosphate (0.009 g, 2 mol%), triethylamine (0.057 g, 0.55 mmol) in MeCN (2.5 mL, 0.2 M) in a 8 mL

Kimax glass vial with a Teflon screw cap and a stir bar. The vial was placed in an ice bath and purged with Argon for 10 min. The vial was positioned between 2 and 4 cm from the light source (blue LED strips) and allowed to stir overnight at ambient temperature. Upon completion, the reaction was concentrated under reduced pressure, diluted in  $\text{CH}_2\text{Cl}_2$  (5.0 mL) and extracted three times with sodium bicarbonate (3 x 2 mL) to remove the benzoic acid. The organic phase was collected, dried with  $\text{Na}_2\text{SO}_4$ , filtered, and concentrated under reduced pressure. The title compounds were purified by column chromatography (10% EtOAc/ $\text{CH}_2\text{Cl}_2 \rightarrow$  20% EtOAc/ $\text{CH}_2\text{Cl}_2$ ).

**4,4-Dimethyl-1-phenyl-2-imidazolidinone (2aj):** as a white solid (0.039 g, 41%).

**$^1\text{H}$  NMR (300 MHz,  $\text{CDCl}_3$ ):**  $\delta$  7.58-7.51 (m, 2H), 7.39-7.30 (m, 2H), 7.10-7.02 (m, 1H), 4.61-5.43 (br s, 1H), 3.66 (s, 2H), 1.41 (s, 6H).

**$^{13}\text{C}$  NMR (100 MHz,  $\text{CDCl}_3$ ):**  $\delta$  158.2 (C), 140.2 (C), 128.8 (CH), 122.5 (CH), 117.7 (CH), 58.2 ( $\text{CH}_2$ ), 51.3 (C), 28.6 ( $\text{CH}_3$ ).

The  $^1\text{H}$  NMR and  $^{13}\text{C}$  NMR is in agreement with previous reports.<sup>23</sup>

**1-Isobutyl-1,3-dihydro-benzoimidazol-2-one (2aj'):** as a pink solid (0.033 g, 35%).

**$^1\text{H}$  NMR (300 MHz,  $\text{CDCl}_3$ ):**  $\delta$  8.92-8.83 (br s, 1H), 7.13-7.05 (m, 3H), 7.02-6.97 (m, 1H), 3.70 (d,  $J = 7.5\text{ Hz}$ , 2H), 2.33-2.17 (m, 1H), 1.00 (d,  $J = 6.7\text{ Hz}$ , 6H).

**$^{13}\text{C}$  NMR (100 MHz,  $\text{CDCl}_3$ ):**  $\delta$  155.8 (C), 130.8 (C), 127.9 (C), 121.3 (CH), 121.1 (CH), 109.5 (CH), 108.1 (CH), 48.3 ( $\text{CH}_2$ ), 27.9 (CH), 20.1 ( $\text{CH}_3$ ).

The  $^1\text{H}$  NMR and  $^{13}\text{C}$  NMR is in agreement with previous reports.<sup>24</sup>

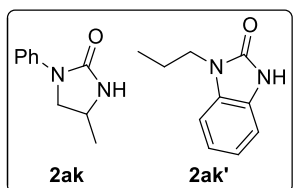

**4-Methyl-1-phenylimidazolidin-2-one (2ak) and 1-propyl-1,3-dihydro-2H-benzo[d]imidazol-2-one (2ak'):** The title compound was synthesized according to general procedure **G** using 3-((4-methoxybenzoyl)oxy)-1-phenyl-1-propylurea (0.164 g, 0.500 mmol), tris(2,2'-bipyridine)ruthenium(II) hexafluorophosphate (0.009 g, 2 mol%),

<sup>23</sup> Kim, T. H.; Lee, G.-J. *J. Org. Chem.* **1999**, *64*, 2941-2943.

<sup>24</sup> Vernin, G.; Domlog, H.; Siv, C.; Metzger, J., El-Shafei, A. K. *J. Heterocycl. Chem.* **1981**, *18*, 85-89.

triethylamine (0.057 g, 0.55 mmol) in MeCN (2.5 mL, 0.2 M) in a 8 mL Kimax glass vial with a Teflon screw cap and a stir bar. The vial was placed in an ice bath and purged with Argon for 10 min. The vial was positioned between 2 and 4 cm from the light source (blue LED strips) and allowed to stir overnight at ambient temperature. Upon completion, the reaction was concentrated under reduced pressure, diluted in CH<sub>2</sub>Cl<sub>2</sub> (5.0 mL) and extracted three times with sodium bicarbonate (3 x 2 mL) to remove the benzoic acid. The organic phase was collected, dried with Na<sub>2</sub>SO<sub>4</sub>, filtered, and concentrated under reduced pressure. The title compounds were purified by column chromatography (10% EtOAc/CH<sub>2</sub>Cl<sub>2</sub> → 20% EtOAc/CH<sub>2</sub>Cl<sub>2</sub>).

**4-Methyl-1-phenylimidazolidin-2-one (2ak):** as a yellow solid (0.009 g, 10%).

**<sup>1</sup>H NMR (300 MHz, CDCl<sub>3</sub>):** δ 7.58-7.51 (m, 2H), 7.39-7.31 (m, 2H), 7.10-7.02 (m, 1H), 4.87-4.79 (br s, 1H), 4.08-3.90 (m, 2H), 3.50 (dd, *J* = 8.3, 7.7 Hz, 1H), 1.36 (d, *J* = 5.9 Hz, 3H).

**<sup>13</sup>C NMR (100 MHz, CDCl<sub>3</sub>):** δ 158.8 (C), 140.1 (C), 128.8 (CH), 122.7 (CH), 117.8 (CH), 52.5 (CH<sub>2</sub>), 44.8 (CH), 21.7 (CH<sub>3</sub>).

The <sup>1</sup>H NMR and <sup>13</sup>C NMR is in agreement with previous reports.<sup>25</sup>

**1-Propyl-1,3-dihydro-2H-benzo[d]imidazol-2-one (2ak'):** as a yellow solid (0.056 g, 63%).

**<sup>1</sup>H NMR (300 MHz, CDCl<sub>3</sub>):** δ 10.69-10.36 (br s, 1H), 7.20-6.97 (m, 4H), 3.93-3.84 (m, 2H), 1.83 (apt sxt, *J* = 7.4 Hz, 2H), 1.01 (t, *J* = 7.4 Hz, 2H).

**<sup>13</sup>C NMR (100 MHz, CDCl<sub>3</sub>):** δ 155.8 (C), 130.4 (C), 128.0 (C), 121.3 (CH), 121.1 (CH), 109.7 (CH), 107.9 (CH), 42.4 (CH<sub>2</sub>), 21.7 (CH<sub>2</sub>), 11.3 (CH).

The <sup>1</sup>H NMR and <sup>13</sup>C NMR is in agreement with previous reports.<sup>26</sup>

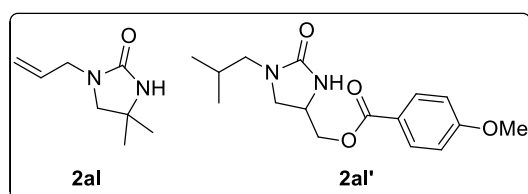

**1-Allyl-4,4-dimethylimidazolidin-2-one (2al) and (1-isobutyl-2-oxoimidazolidin-4-yl)methyl 4-methoxybenzoate (2al'):** The title compound was synthesized according to general procedure G using 1-allyl-1-isobutyl-3-((4-methoxybenzoyl)oxy)urea (0.306 g, 1.00 mmol), tris(2,2'-bipyridine)ruthenium(II)

hexafluorophosphate (0.017 g, 2 mol%), triethylamine (0.111 g, 0.55 mmol) in MeCN (5.0 mL, 0.2 M) in a 8 mL Kimax glass vial with a Teflon screw cap and a stir bar. The vial was placed in an ice bath and purged with Argon for 10 min. The vial was positioned between 2 and 4 cm from the light source (blue LED strips) and allowed to stir overnight at ambient temperature. Upon completion, the reaction was concentrated under reduced pressure, diluted in CH<sub>2</sub>Cl<sub>2</sub> (5.0 mL) and extracted three times with sodium bicarbonate (3 x 2 mL) to remove the benzoic acid. The organic phase was collected, dried with Na<sub>2</sub>SO<sub>4</sub>, filtered, and concentrated under reduced pressure. The title compounds were isolated as a mixture by column chromatography (20% EtOAc/CH<sub>2</sub>Cl<sub>2</sub> → 40% EtOAc/CH<sub>2</sub>Cl<sub>2</sub>), white solid (59%, 1 : 2 (2al : 2al')).

<sup>25</sup> Kim, T. H.; Lee, G.-J. *J. Org. Chem.* **1999**, 64, 2941-2943.

<sup>26</sup> Tapia, I.; Alonso-Cires, L.; López-Tudanca, P. L.; Mosquera, R.; Labeaga, L.; Innerarity, A.; Orjales, A. *J. Med. Chem.* **1999**, 42, 2870-2880.



**TLC  $R_f$ :** 0.30 in 50% EtOAc/ $\text{CH}_2\text{Cl}_2$ .

**1-Allyl-4,4-dimethylimidazolidin-2-one (2al):**

**$^1\text{H}$  NMR (400 MHz,  $\text{CDCl}_3$ ):**  $\delta$  5.73 (ddt,  $J = 17.1, 10.2, 6.0$  Hz, 1H), 5.19-5.12 (m, 2H), 4.50 (br s, 1H), 3.76 (dt,  $J = 6.0, 1.4$  Hz, 2H), 3.09 (s, 2H), 1.27 (s, 6H).

**$^{13}\text{C}$  NMR (100 MHz,  $\text{CDCl}_3$ ):**  $\delta$  160.7 (C), 133.5 (CH), 117.4 ( $\text{CH}_2$ ), 57.7 ( $\text{CH}_2$ ), 52.0 (C), 46.1 ( $\text{CH}_2$ ), 28.5 ( $\text{CH}_3$ ).

The  $^1\text{H}$  NMR and  $^{13}\text{C}$  NMR is in agreement with previous reports.<sup>27</sup>

**1-Isobutyl-2-oxoimidazolidin-4-yl)methyl 4-methoxybenzoate (2al'):**

**$^1\text{H}$  NMR (400 MHz,  $\text{CDCl}_3$ ):**  $\delta$  7.96 (d,  $J = 9.0$  Hz, 2H), 6.89 (d,  $J = 9.0$  Hz, 2H), 5.07 (br s, 1H), 4.33 (dd,  $J = 11.1, 4.9$  Hz, 1H), 4.19 (dd,  $J = 11.1, 7.0$  Hz, 1H), 4.05-3.98 (m, 1H), 3.84 (s, 3H), 3.57 (t,  $J = 9.1$  Hz, 1H), 3.22 (dd,  $J = 9.2, 5.3$  Hz, 1H), 2.97 (qd,  $J = 12.5, 7.5$  Hz, 2H), 1.84 (tt,  $J = 13.8, 6.9$  Hz, 1H), 0.88 (dd,  $J = 6.7, 3.2$  Hz, 6H).

**$^{13}\text{C}$  NMR (100 MHz,  $\text{CDCl}_3$ ):**  $\delta$  166.0 (C), 163.7 (C), 161.7 (C), 131.8 (CH), 121.9 (C), 113.8 (CH), 66.4 ( $\text{CH}_2$ ), 55.5 ( $\text{CH}_3$ ), 51.0 ( $\text{CH}_2$ ), 48.6 (CH), 48.0 ( $\text{CH}_2$ ), 26.9 (CH), 20.0 ( $\text{CH}_3$ ).

**IR (FTIR):** 3210, 2950, 1681, 1604, 1450, 1254, 1113  $\text{cm}^{-1}$ .

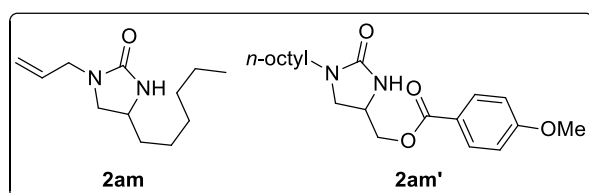

**1-Allyl-4-hexylimidazolidin-2-one (2am) and (1-octyl-2-oxoimidazolidin-4-yl)methyl 4-methoxybenzoate (2am'):** The title compounds were synthesized according to general procedure **G** using 1-allyl-3-((4-methoxybenzoyl)oxy)-1-octylurea (0.362 g, 1.00 mmol), tris(2,2'-

bipyridine)ruthenium(II) hexafluorophosphate (0.017 g, 2 mol%), triethylamine (0.111 g, 0.55 mmol) in MeCN (5.0 mL, 0.2 M) in a 8 mL Kimax glass vial with a Teflon screw cap and a stir bar. The vial was placed in an ice bath and purged with Argon for 10 min. The vial was positioned between 2 and 4 cm from the light source (blue LED strips) and allowed to stir overnight at ambient temperature. Upon completion, the reaction was concentrated under reduced pressure, diluted in  $\text{CH}_2\text{Cl}_2$  (5.0 mL) and extracted three times with sodium bicarbonate (3 x 2 mL) to remove the benzoic acid. The organic phase was collected, dried with  $\text{Na}_2\text{SO}_4$ , filtered, and concentrated under reduced pressure. The title compounds co-eluted upon flash column chromatography (20% EtOAc/ $\text{CH}_2\text{Cl}_2 \rightarrow$  40% EtOAc/ $\text{CH}_2\text{Cl}_2$ ), (0.175 g, 48% yield) white solid (10 : 1 (**2am** : **2am'**)).

**TLC  $R_f$ :** 0.41 in 100% EtOAc.

**1-Allyl-4-hexylimidazolidin-2-one (2am):**

**$^1\text{H}$  NMR (400 MHz,  $\text{CDCl}_3$ ):** (300 MHz,  $\text{CDCl}_3$ )  $\delta$  5.74 (ddt,  $J = 17.1, 10.1, 6.0$  Hz, 1H), 5.20-5.13 (m, 2H), 4.45 (br s, 1H), 3.82-3.69 (m, 2H), 3.63-3.61 (m, 1H), 3.01-2.94 (m, 1H), 1.53-1.44 (m, 10H), 0.90-0.88 (m, 3H).

<sup>27</sup> Kim, T. H.; Lee, G.-J. *J. Org. Chem.* **1999**, *64*, 2941-2943.

**<sup>13</sup>C NMR (100 MHz, CDCl<sub>3</sub>):** δ 160.3 (C), 133.4 (CH), 117.5 (CH<sub>2</sub>), 50.5 (CH<sub>2</sub>), 50.1 (CH), 46.2 (CH<sub>2</sub>), 36.0 (CH<sub>2</sub>), 31.6 (CH<sub>2</sub>), 29.1 (CH<sub>2</sub>), 25.5 (CH<sub>2</sub>), 22.5 (CH<sub>2</sub>), 14.1 (CH<sub>3</sub>).

**(1-Octyl-2-oxoimidazolidin-4-yl)methyl 4-methoxybenzoate (2am'):**

**<sup>1</sup>H NMR (400 MHz, CDCl<sub>3</sub>):** δ 7.95 (d, *J* = 9.0 Hz, 2H), 6.90 (d, *J* = 9.0 Hz, 2H), 4.67 (br s, 1H), 4.33 (dd, *J* = 11.1, 4.8 Hz, 1H), 4.20 (dd, *J* = 11.1, 6.9 Hz, 1H), 4.03-3.99 (m, 1H), 3.85 (s, 3H), 3.58 (t, *J* = 9.0 Hz, 1H), 3.45 (s, ), 3.24-3.12 (m, 3H), 1.29-1.23 (m, 12H), 0.87-0.84 (m, 3H).

**<sup>13</sup>C NMR (100 MHz, CDCl<sub>3</sub>):** δ 166.0 (C), 163.7 (C), 161.4 (C), 131.8 (CH), 121.8 (C), 113.8 (CH), 66.3 (CH<sub>2</sub>), 55.5 (CH<sub>3</sub>), 48.6 (CH), 47.4 (CH<sub>2</sub>), 43.4 (CH<sub>2</sub>), 31.8 (CH<sub>2</sub>), 29.3 (CH<sub>2</sub>), 29.2 (CH<sub>2</sub>), 27.6 (CH<sub>2</sub>), 26.8 (CH<sub>2</sub>), 22.6 (CH<sub>2</sub>), 14.1 (CH<sub>3</sub>).

**IR (FTIR):** 3205, 2920, 2855, 1681, 1605, 1455, 1255, 1118 cm<sup>-1</sup>.

#### Synthesis of tetrabutylammonium dibutyl phosphate base

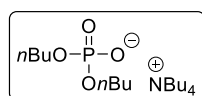

**Tetrabutylammonium dibutyl phosphate (7a):** The title compound was synthesized according to a literature procedure.<sup>28</sup>

**<sup>1</sup>H NMR (300 MHz, CDCl<sub>3</sub>):** δ 3.81 (q, *J* = 6.6 Hz, 4H), 3.44-3.31 (m, 8H), 1.75-1.52 (m, 12H), 1.51-1.29 (m, 12H), 0.99 (t, *J* = 7.3 Hz, 6H), 0.89 (t, *J* = 7.3 Hz, 6H).

**<sup>13</sup>C NMR (75 MHz, CDCl<sub>3</sub>):** δ 64.7 (CH<sub>2</sub>), 59.0 (CH<sub>2</sub>), 33.3 (CH<sub>2</sub>), 24.3 (CH<sub>2</sub>), 19.0 (CH<sub>2</sub>), 19.3 (CH<sub>2</sub>), 14.0 (CH<sub>3</sub>), 13.8 (CH<sub>3</sub>).

**<sup>31</sup>P NMR (121 MHz, CDCl<sub>3</sub>):** δ -2.26 (s).

The <sup>1</sup>H NMR and <sup>13</sup>C NMR is in agreement with previous reports.

#### Synthesis of benzoyl *N*-oxyureas for initial reaction screening

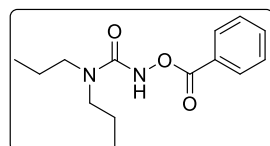

**3-(Benzoyloxy)-1,1-dipropylurea (5a):** The title compound was synthesized according to a literature procedure.<sup>13</sup>

<sup>28</sup> Zhu, Q.; Graff, D. E.; Knowles, R. R. *J. Am. Chem. Soc.* **2018**, *140*, 741.

**<sup>1</sup>H NMR (300 MHz, CDCl<sub>3</sub>):** δ 8.57 (br s, 1H), 8.12-8.08 (m, 2H), 7.62-7.56 (m, 1H), 7.44 (tt, *J* = 7.5, 1.3 Hz, 2H), 3.24 (t, *J* = 7.6 Hz, 4H), 1.64 (ap sext, *J* = 7.5 Hz, 4H), 0.92 (t, *J* = 7.4 Hz, 6H).

**<sup>13</sup>C NMR (100 MHz, CDCl<sub>3</sub>):** δ 167.2 (C), 157.6 (C), 134.0 (C), 129.9 (CH), 128.6 (CH), 127.3 (C), 49.0 (CH<sub>2</sub>), 21.4 (CH<sub>2</sub>), 11.3 (CH<sub>3</sub>).

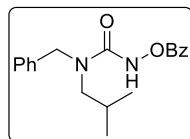

**3-(Benzoyloxy)-1-benzyl-1-isobutylurea (5b):** The title compound was synthesized according to general procedure C using phenyl benzoyloxycarbamate (0.630 g, 2.45 mmol), and *N*-benzyl-2-methylpropan-1-amine (0.400 g, 2.45 mmol) and imidazole (0.017 g, 0.25 mol) in THF (10.0 mL, 0.30 M). The reaction was heated under microwave irradiation for 4 h at 100 °C. Upon completion, the reaction mixture was concentrated under reduced pressure. The crude mixture was dissolved in hexanes and then recrystallized in Et<sub>2</sub>O/hexanes. The solid was then filtered and washed with hexanes to give pure product. The title compound was obtained as a crystalline white solid (0.763 g, 78%).

**M.p.:** 140.1-140.4 °C.

**TLC R<sub>f</sub>:** 0.55 in 25% EtOAc/Hexanes.

**<sup>1</sup>H NMR (300 MHz; CDCl<sub>3</sub>):** δ 8.50-8.40 (1H, br. s.), 8.18-8.08 (2H, m), 7.67-7.57 (1H, m), 7.53-7.27 (7H, m), 4.61 (2H, s), 3.20 (2H, d, *J* = 6 Hz), 2.09 (1H, sept, *J* = 6 Hz), 0.99 (6H, d, *J* = 6 Hz).

**<sup>13</sup>C NMR (100 MHz, CDCl<sub>3</sub>):** δ 167.0 (C), 158.3 (C), 136.4 (C), 134.0 (CH), 129.9 (CH), 128.9 (CH), 128.6 (CH), 127.8 (CH), 127.1 (CH), 127.0 (C), 54.6 (CH<sub>2</sub>), 50.6 (CH<sub>2</sub>), 27.3 (CH), 20.2 (CH<sub>3</sub>).

**IR (FTIR):** 3106, 2955, 1756, 1645, 1495, 1232 cm<sup>-1</sup>.

**HRMS (ESI) m/z:** Exact mass calcd for C<sub>19</sub>H<sub>22</sub>N<sub>2</sub>O<sub>3</sub>Na [M+Na]<sup>+</sup>: 349.1528. Found: 349.1515.

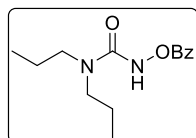

**3-(Benzoyloxy)-1,1-dipropylurea (5c):** The title compound was synthesized according to a literature procedure.<sup>13</sup>

**<sup>1</sup>H NMR (300 MHz, CDCl<sub>3</sub>):** δ 8.57 (br s, 1H), 8.12-8.08 (m, 2H), 7.62-7.56 (m, 1H), 7.44 (tt, *J* = 7.5, 1.3 Hz, 2H), 3.24 (t, *J* = 7.6 Hz, 4H), 1.64 (ap sext, *J* = 7.5 Hz, 4H), 0.92 (t, *J* = 7.4 Hz, 6H).

**<sup>13</sup>C NMR (100 MHz, CDCl<sub>3</sub>):** δ 167.2 (C), 157.6 (C), 134.0 (C), 129.9 (CH), 128.6 (CH), 127.3 (C), 49.0 (CH<sub>2</sub>), 21.4 (CH<sub>2</sub>), 11.3 (CH<sub>3</sub>).

The <sup>1</sup>H NMR and <sup>13</sup>C NMR is in agreement with previous reports.

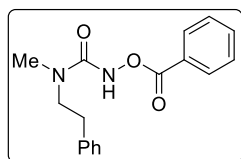

**3-(Benzoyloxy)-1-methyl-1-phenethylurea (5d):** The title compound was synthesized according to general procedure C using phenyl benzoyloxycarbamate (0.772 g, 3.00 mmol), and *N*-methyl-2-phenylethanamine (0.406 mg, 3.00 mmol) and imidazole (0.020 g, 0.30 mmol) in THF (16.7 mL, 0.30 M). The reaction was heated under microwave irradiation for 2 h at 100 °C

Solvent was removed under reduced pressure and the crude product isolated using flash chromatography (20% EtOAc/Hexanes) to yield the title compound as a colourless oil (0.841 g, 95%).

**TLC  $R_f$ :** 0.35 in 33% EtOAc/Hexanes.

**$^1\text{H}$  NMR (400 MHz,  $\text{CDCl}_3$ ):**  $\delta$  8.25 (s, 1H), 8.11-8.08 (m, 2H), 7.63-7.57 (m, 1H), 7.48-7.43 (m, 2H), 7.33-7.28 (m, 2H), 7.23-7.19 (m, 3H), 3.56 (t,  $J = 7.4$  Hz, 2H), 2.92-2.88 (m, 5H).

**$^{13}\text{C}$  NMR (100 MHz,  $\text{CDCl}_3$ ):**  $\delta$  166.9 (C), 157.7 (C), 138.7 (C), 134.1 (C), 130.1 (CH), 129.0 (CH), 128.9 (CH), 128.8 (CH), 127.3 (C), 126.8 (CH), 51.5 ( $\text{CH}_2$ ), 34.9 ( $\text{CH}_3$ ), 34.3 ( $\text{CH}_2$ ).

**IR (FTIR):** 3257, 3071, 3027, 2948, 1750, 1672, 1485, 1253, 1079  $\text{cm}^{-1}$ .

**HRMS (ESI)  $m/z$ :** Exact mass calcd for  $\text{C}_{17}\text{H}_{18}\text{N}_2\text{O}_3\text{Na}$   $[\text{M}+\text{Na}]^+$ : 321.1210. Found: 321.1215.

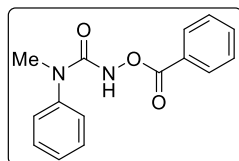

**3-(Benzoyloxy)-1-methyl-1-phenylurea (5e):** The title compound was synthesized according to a literature procedure.<sup>13</sup>

**$^1\text{H}$  NMR (400 MHz,  $\text{CDCl}_3$ ):**  $\delta$  8.11 (br s, 1H), 8.07-8.04 (m, 2H), 7.62-7.57 (m, 1H), 7.51-7.35 (m, 7H), 3.33 (s, 3H).

**$^{13}\text{C}$  NMR (100 MHz,  $\text{CDCl}_3$ ):**  $\delta$  166.8 (C), 157.1 (C), 141.4 (C), 134.0 (C), 130.4 (CH), 130.0 (CH), 128.7 (CH), 128.6 (CH), 127.2 (CH), 127.1 (CH), 38.0 ( $\text{CH}_3$ ).

The  $^1\text{H}$  NMR and  $^{13}\text{C}$  NMR is in agreement with previous reports.

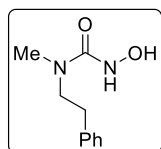

**1-Methyl-1-phenethyl-3-hydroxyurea (6e):** The title compound was synthesized according to general procedure C using phenyl *N*-hydroxycarbamate (0.337 g, 2.20 mmol), and *N*-methyl-*N*-phenethylamine (0.270 g, 2.20 mmol) and  $\text{Et}_3\text{N}$  (0.6 mL, 0.4 mmol) in THF (6.0 mL, 0.30 M). The vial was sealed with a microwave cap and heated for 16 h at 70  $^\circ\text{C}$  via an oil bath heating. The reaction mixture was concentrated under reduced pressure and isolated using flash chromatography (1% MeOH/ $\text{CH}_2\text{Cl}_2 \rightarrow$  5% MeOH/ $\text{CH}_2\text{Cl}_2$ ). The title compound was obtained as an amorphous white solid (0.321 g, 83%).

**TLC  $R_f$ :** 0.15 in 2% MeOH/ $\text{CH}_2\text{Cl}_2$ .

**$^1\text{H}$  NMR (400 MHz,  $\text{CDCl}_3$ ):**  $\delta$  7.37-7.30 (m, 2H), 7.29-7.23 (m, 1H), 7.22-7.18 (m, 2H), 6.43-6.38 (br s, 1H), 6.30-6.23 (br s, 1H), 3.52 (t,  $J = 7.1$  Hz, 2H), 2.90-2.83 (m, 5H).

**$^{13}\text{C}$  NMR (100 MHz,  $\text{CDCl}_3$ ):**  $\delta$  161.5 (C), 138.5 (C), 128.9 (CH), 128.8 (CH), 126.9 (CH), 50.6 ( $\text{CH}_2$ ), 34.1 ( $\text{CH}_2$ ), 33.9 ( $\text{CH}_3$ ).

**IR (FTIR):** 3326, 3023, 2924, 1645, 1491, 1390, 1296  $\text{cm}^{-1}$ .

**HRMS (ESI)  $m/z$ :** Exact mass calcd for  $\text{C}_{10}\text{H}_{14}\text{N}_2\text{O}_2\text{Na}$   $[\text{M}+\text{Na}]^+$ : 217.0948. Found: 217.0926.

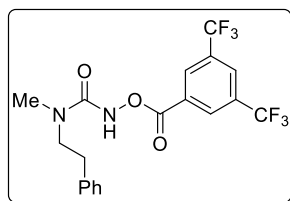**3-((3,5-Bistrifluoromethylbenzoyl)oxy)-1-methyl-1-phenethylurea (5f):**

The title compound was synthesized according to the general procedure **B** using the pure 1-methyl-1-phenethyl-3-hydroxyurea (0.321 g, 1.66 mmol) was added  $\text{CH}_2\text{Cl}_2$  (0.30 M) and cooled to 0 °C. To this was added  $\text{Et}_3\text{N}$  (0.23 mL, 1.66 mmol) followed immediately by dropwise addition of 3,5-bis(trifluoromethyl)benzoyl chloride (0.30 mL, 1.66 mmol). The reaction was allowed to warm to room temperature and stirred overnight. Upon completion, the reaction was extracted with  $\text{NaHCO}_3$  (5.0 mL x1), and then brine (5.0 mL x1). The organic phase was collected and dried with  $\text{Na}_2\text{SO}_4$ . The solids were filtered over a cotton plug, and the filtrate was evaporated under reduced pressure to provide the crude which was purified by flash column chromatography (20% EtOAc/Hexanes). The title compound was obtained as an amorphous white solid (0.370 g, 46%).

**TLC  $R_f$ :** 0.97 in 2% MeOH/ $\text{CH}_2\text{Cl}_2$ .

**$^1\text{H}$  NMR (400 MHz,  $\text{CDCl}_3$ ):**  $\delta$  8.56-8.53 (br s, 2H), 8.14-8.11 (br s, 1H), 8.10-8.06 (br s, 1H), 7.38-7.32 (m, 2H), 7.30-7.23 (m, 3H), 3.60 (t,  $J$  = 7.2 Hz, 2H), 2.96-2.89 (m, 5H).

**$^{13}\text{C}$  NMR (100 MHz,  $\text{CDCl}_3$ ):**  $\delta$  164.3 (C), 157.0 (C), 138.4 (C), 132.5 (C, q,  $J$  = 26 Hz), 130.0 (CH), 129.5 (C), 128.9 (CH), 128.8 (CH), 127.3 (CH, m), 126.8 (CH), 122.7 (C, d,  $J$  = 203 Hz), 51.3 ( $\text{CH}_2$ ), 34.7 (CH), 34.1 ( $\text{CH}_2$ ).

**IR (FTIR):** 3208, 1774, 1670, 1497, 1279, 1121  $\text{cm}^{-1}$ .

**HRMS (ESI)  $m/z$ :** Exact mass calcd for  $\text{C}_9\text{H}_{16}\text{F}_6\text{N}_2\text{O}_3\text{Na}$   $[\text{M}+\text{Na}]^+$ : 457.0963. Found: 457.0954.

## Computational Details/DFT Calculations

Density functional theory (DFT) calculations have been performed using WebMO (G09). Optimized molecular geometries were calculated using the B3LYP<sup>29</sup> exchange-correlation functional. The 6-311+G(2d,p) basis set was used for calculations. Vibrational frequency calculations were performed to ensure that the stationary points and to calculate vibrational zero point energy. The unscaled frequencies were used for calculating enthalpies and BDEs (at 298 K and 1 atm).

Ultimately DFT data are inconsistent with an EnT process affording triplet nitrenes from the neutral precursor. Combined with <sup>1</sup>H-NMR studies, which indicated that deprotonation of the substrate does not occur with Et<sub>3</sub>N, we conclude that EnT to the anionic precursor is also unlikely in this system. Moreover, even if the precursor could be deprotonated, the triplet transfer from Ru(bpy)<sub>3</sub> to the anionic substrate is still expected to be slow, given the endothermicity of the process. On the other hand, DFT lends some support to the PCET oxidation pathway, given the downhill formation of the capto-dative N-centered radical.

---

(<sup>29</sup>) Becke, A. D. *J. Chem. Phys.* **1993**, *98*, 5648.

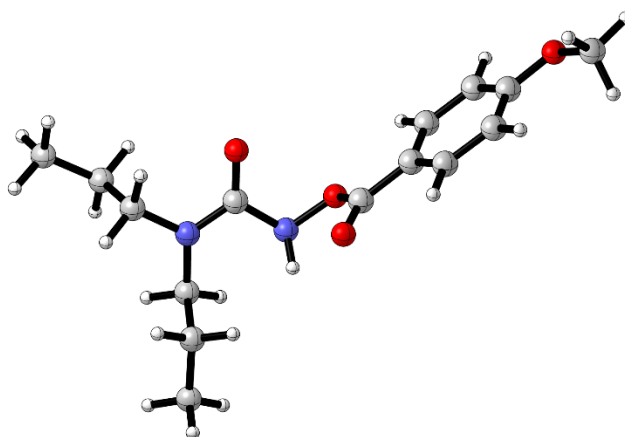

## Vibrational frequency of 1p

| Quantity        | Value                                                                                            |
|-----------------|--------------------------------------------------------------------------------------------------|
| Job History     | <a href="#">20370,20385,37254,37256,40582</a>                                                    |
| Route           | #N B3LYP/6-311+G(2d,p) FREQ SCRF=(PCM,Solvent=Acetonitrile) Geom=Conne                           |
| Stoichiometry   | C <sub>15</sub> H <sub>22</sub> N <sub>2</sub> O <sub>4</sub>                                    |
| Symmetry        | C1                                                                                               |
| Basis           | 6-311+G(2d,p)                                                                                    |
| RB3LYP Energy   | -995.546488834 Hartree                                                                           |
| ZPE             | 0.359200 Hartree                                                                                 |
| Conditions      | 298.150K, 1.00000 atm                                                                            |
| Internal Energy | -995.164753 Hartree                                                                              |
| Enthalpy        | -995.163809 Hartree                                                                              |
| Free Energy     | -995.242439 Hartree                                                                              |
| C <sub>v</sub>  | 81.842 cal/mol-K                                                                                 |
| Entropy         | 165.491 cal/mol-K                                                                                |
| Dipole Moment   | 3.1563 Debye  |
| Server          | 10.72.192.49 (10221)                                                                             |
| CPU time        | 96457.7 sec                                                                                      |

Input orientation:

| -----  |        |        |                         |           |          |
|--------|--------|--------|-------------------------|-----------|----------|
| Center | Atomic | Atomic | Coordinates (Angstroms) |           |          |
| Number | Number | Type   | X                       | Y         | Z        |
| -----  |        |        |                         |           |          |
| 1      | 6      | 0      | 0.000000                | 0.000000  | 0.000000 |
| 2      | 8      | 0      | 0.000000                | 0.000000  | 1.432224 |
| 3      | 6      | 0      | 1.183856                | 0.000000  | 2.085138 |
| 4      | 6      | 0      | 2.433916                | 0.001153  | 1.456067 |
| 5      | 6      | 0      | 3.585120                | 0.001332  | 2.228635 |
| 6      | 6      | 0      | 3.519575                | -0.000618 | 3.623707 |
| 7      | 6      | 0      | 2.260242                | -0.001332 | 4.244469 |
| 8      | 6      | 0      | 1.108261                | -0.000827 | 3.485685 |
| 9      | 1      | 0      | 0.132897                | 0.000084  | 3.955443 |
| 10     | 1      | 0      | 2.187256                | 0.000507  | 5.323079 |
| 11     | 6      | 0      | 4.781127                | 0.006717  | 4.380493 |
| 12     | 8      | 0      | 5.896918                | 0.050575  | 3.913319 |
| 13     | 8      | 0      | 4.566769                | -0.082665 | 5.736446 |
| 14     | 7      | 0      | 5.738994                | -0.024985 | 6.519091 |
| 15     | 6      | 0      | 6.109635                | 1.327536  | 6.813344 |
| 16     | 8      | 0      | 5.374201                | 2.265570  | 6.533386 |
| 17     | 7      | 0      | 7.286710                | 1.440592  | 7.471586 |
| 18     | 6      | 0      | 8.107298                | 0.297135  | 7.888463 |
| 19     | 1      | 0      | 8.564971                | 0.561239  | 8.844482 |
| 20     | 1      | 0      | 7.455273                | -0.554478 | 8.087730 |
| 21     | 6      | 0      | 9.202361                | -0.085642 | 6.886945 |
| 22     | 6      | 0      | 10.056578               | -1.247440 | 7.395331 |
| 23     | 1      | 0      | 10.830572               | -1.508891 | 6.671335 |
| 24     | 1      | 0      | 10.552125               | -0.991239 | 8.335581 |
| 25     | 1      | 0      | 9.448750                | -2.139028 | 7.570814 |
| 26     | 1      | 0      | 8.749588                | -0.351457 | 5.926531 |
| 27     | 1      | 0      | 9.834914                | 0.786040  | 6.696256 |



*Supporting Information*

|    |   |   |           |           |           |
|----|---|---|-----------|-----------|-----------|
| 28 | 6 | 0 | 7.754372  | 2.783462  | 7.833989  |
| 29 | 1 | 0 | 8.845564  | 2.775186  | 7.779251  |
| 30 | 1 | 0 | 7.393986  | 3.482671  | 7.080371  |
| 31 | 6 | 0 | 7.300322  | 3.232989  | 9.224962  |
| 32 | 6 | 0 | 7.838154  | 4.619893  | 9.579063  |
| 33 | 1 | 0 | 7.503627  | 4.927736  | 10.571774 |
| 34 | 1 | 0 | 8.931601  | 4.633687  | 9.577120  |
| 35 | 1 | 0 | 7.494507  | 5.372096  | 8.863826  |
| 36 | 1 | 0 | 6.207430  | 3.235682  | 9.255078  |
| 37 | 1 | 0 | 7.635539  | 2.505619  | 9.970688  |
| 38 | 1 | 0 | 6.465460  | -0.532652 | 6.019176  |
| 39 | 1 | 0 | 4.554037  | 0.002910  | 1.746703  |
| 40 | 1 | 0 | 2.517199  | 0.002177  | 0.379126  |
| 41 | 1 | 0 | -1.046656 | -0.000115 | -0.292206 |
| 42 | 1 | 0 | 0.489787  | 0.894243  | -0.390436 |
| 43 | 1 | 0 | 0.489964  | -0.894242 | -0.390303 |

---

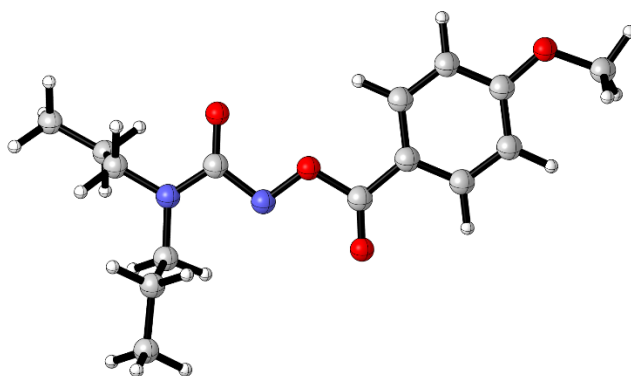

## Vibrational frequency of 1p radical

| Quantity        | Value                                                                                            |
|-----------------|--------------------------------------------------------------------------------------------------|
| Job History     | <a href="#">20370,20385,37254,37256,37262,37918,37924,40580</a>                                  |
| Route           | #N B3LYP/6-311+G(2d,p) FREQ SCRF=(PCM,Solvent=Acetonitrile) Geom=Conne                           |
| Stoichiometry   | C <sub>15</sub> H <sub>21</sub> N <sub>2</sub> O <sub>4</sub> (2)                                |
| Symmetry        | C1                                                                                               |
| Basis           | 6-311+G(2d,p)                                                                                    |
| UB3LYP Energy   | -994.897469537 Hartree                                                                           |
| ZPE             | 0.345825 Hartree                                                                                 |
| Conditions      | 298.150K, 1.00000 atm                                                                            |
| Internal Energy | -994.529155 Hartree                                                                              |
| Enthalpy        | -994.528211 Hartree                                                                              |
| Free Energy     | -994.607363 Hartree                                                                              |
| C <sub>v</sub>  | 81.219 cal/mol-K                                                                                 |
| Entropy         | 166.590 cal/mol-K                                                                                |
| Dipole Moment   | 2.1669 Debye  |
| Server          | 10.72.192.49 (8931)                                                                              |
| CPU time        | 196664.1 sec                                                                                     |

## Supporting Information

Input orientation:

| -----  |        |        |                         |           |          |  |
|--------|--------|--------|-------------------------|-----------|----------|--|
| Center | Atomic | Atomic | Coordinates (Angstroms) |           |          |  |
| Number | Number | Type   | X                       | Y         | Z        |  |
| -----  |        |        |                         |           |          |  |
| 1      | 6      | 0      | 0.000000                | 0.000000  | 0.000000 |  |
| 2      | 8      | 0      | 0.000000                | 0.000000  | 1.433319 |  |
| 3      | 6      | 0      | 1.180029                | 0.000000  | 2.087334 |  |
| 4      | 6      | 0      | 2.432270                | -0.000042 | 1.459080 |  |
| 5      | 6      | 0      | 3.581012                | 0.000109  | 2.231527 |  |
| 6      | 6      | 0      | 3.513957                | 0.000449  | 3.628938 |  |
| 7      | 6      | 0      | 2.251920                | 0.000141  | 4.248712 |  |
| 8      | 6      | 0      | 1.102275                | 0.000029  | 3.488243 |  |
| 9      | 1      | 0      | 0.126073                | -0.000077 | 3.955997 |  |
| 10     | 1      | 0      | 2.177308                | -0.000396 | 5.326875 |  |
| 11     | 6      | 0      | 4.773627                | 0.000731  | 4.376796 |  |
| 12     | 8      | 0      | 5.887718                | 0.000080  | 3.930605 |  |
| 13     | 8      | 0      | 4.518235                | 0.001432  | 5.766537 |  |
| 14     | 7      | 0      | 5.636782                | 0.004070  | 6.523536 |  |
| 15     | 6      | 0      | 5.225394                | -0.011077 | 7.889625 |  |
| 16     | 8      | 0      | 4.057880                | -0.067216 | 8.268736 |  |
| 17     | 7      | 0      | 6.299620                | 0.044579  | 8.719248 |  |
| 18     | 6      | 0      | 7.699296                | 0.112199  | 8.270771 |  |
| 19     | 1      | 0      | 8.294802                | -0.410877 | 9.022457 |  |
| 20     | 1      | 0      | 7.803498                | -0.436386 | 7.338025 |  |
| 21     | 6      | 0      | 8.210684                | 1.545103  | 8.101867 |  |
| 22     | 6      | 0      | 9.693195                | 1.579160  | 7.729952 |  |
| 23     | 1      | 0      | 10.039733               | 2.607003  | 7.606027 |  |
| 24     | 1      | 0      | 10.307106               | 1.111617  | 8.504498 |  |
| 25     | 1      | 0      | 9.879097                | 1.049666  | 6.791727 |  |
| 26     | 1      | 0      | 7.616680                | 2.038248  | 7.327299 |  |

*Supporting Information*

|    |   |   |           |           |           |
|----|---|---|-----------|-----------|-----------|
| 27 | 1 | 0 | 8.047615  | 2.102393  | 9.029053  |
| 28 | 6 | 0 | 6.051758  | 0.065835  | 10.162910 |
| 29 | 1 | 0 | 6.848302  | 0.653788  | 10.623421 |
| 30 | 1 | 0 | 5.108061  | 0.581604  | 10.338005 |
| 31 | 6 | 0 | 6.005606  | -1.335205 | 10.782879 |
| 32 | 6 | 0 | 5.766103  | -1.280142 | 12.291890 |
| 33 | 1 | 0 | 5.739741  | -2.284855 | 12.718416 |
| 34 | 1 | 0 | 6.558452  | -0.723387 | 12.799526 |
| 35 | 1 | 0 | 4.814797  | -0.794375 | 12.524707 |
| 36 | 1 | 0 | 5.212278  | -1.909157 | 10.297508 |
| 37 | 1 | 0 | 6.946560  | -1.853296 | 10.574884 |
| 38 | 1 | 0 | 4.550552  | 0.000008  | 1.750804  |
| 39 | 1 | 0 | 2.516054  | -0.000131 | 0.382245  |
| 40 | 1 | 0 | -1.046705 | 0.000533  | -0.291425 |
| 41 | 1 | 0 | 0.490416  | 0.894223  | -0.389182 |
| 42 | 1 | 0 | 0.489496  | -0.894740 | -0.389198 |

-----

## Vibrational frequency of H-atom

| Quantity        | Value                                                                                            |
|-----------------|--------------------------------------------------------------------------------------------------|
| Job History     | <a href="#">20371,20372</a>                                                                      |
| Route           | #N B3LYP/6-311+G(2d,p) OPT FREQ SCRF=(PCM,Solvent=Acetonitrile) Geom=C                           |
| Stoichiometry   | H(2)                                                                                             |
| Symmetry        | OH                                                                                               |
| Basis           | 6-311+G(2d,p)                                                                                    |
| UB3LYP Energy   | -0.502177020841 Hartree                                                                          |
| ZPE             | 0.000000 Hartree                                                                                 |
| Conditions      | 298.150K, 1.00000 atm                                                                            |
| Internal Energy | -0.500761 Hartree                                                                                |
| Enthalpy        | -0.499817 Hartree                                                                                |
| Free Energy     | -0.512831 Hartree                                                                                |
| C <sub>v</sub>  | 2.981 cal/mol-K                                                                                  |
| Entropy         | 27.392 cal/mol-K                                                                                 |
| Dipole Moment   | 0.0000 Debye  |
| Server          | 10.72.192.49 (31757)                                                                             |
| CPU time        | 1.4 sec                                                                                          |

Input orientation:

| -----  |        |        |                         |          |          |
|--------|--------|--------|-------------------------|----------|----------|
| Center | Atomic | Atomic | Coordinates (Angstroms) |          |          |
| Number | Number | Type   | X                       | Y        | Z        |
| -----  |        |        |                         |          |          |
| 1      | 1      | 0      | 0.000000                | 0.000000 | 0.000000 |
| -----  |        |        |                         |          |          |

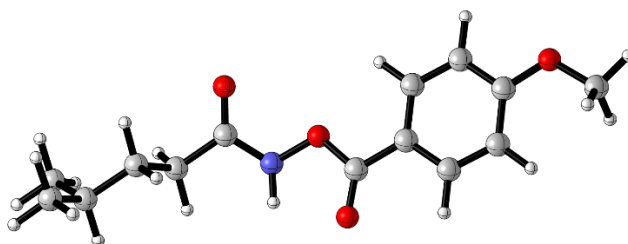

## Vibrational frequency of 1h

| Quantity        | Value                                                                                            |
|-----------------|--------------------------------------------------------------------------------------------------|
| Job History     | <a href="#">20370,23453,23465,23475,43197,43199,43200</a>                                        |
| Route           | #N B3LYP/6-311+G(2d,p) FREQ SCRF=(PCM,Solvent=Acetonitrile) Geom=Conne                           |
| Stoichiometry   | C <sub>14</sub> H <sub>19</sub> NO <sub>4</sub>                                                  |
| Symmetry        | C1                                                                                               |
| Basis           | 6-311+G(2d,p)                                                                                    |
| RB3LYP Energy   | -900.848191837 Hartree                                                                           |
| ZPE             | 0.313090 Hartree                                                                                 |
| Conditions      | 298.150K, 1.00000 atm                                                                            |
| Internal Energy | -900.515112 Hartree                                                                              |
| Enthalpy        | -900.514168 Hartree                                                                              |
| Free Energy     | -900.587179 Hartree                                                                              |
| C <sub>v</sub>  | 73.106 cal/mol-K                                                                                 |
| Entropy         | 153.663 cal/mol-K                                                                                |
| Dipole Moment   | 5.0929 Debye  |
| Server          | General (68310)                                                                                  |
| CPU time        | 47443.4 sec                                                                                      |

## Supporting Information

Input orientation:

| -----  |        |        |                         |           |           |  |
|--------|--------|--------|-------------------------|-----------|-----------|--|
| Center | Atomic | Atomic | Coordinates (Angstroms) |           |           |  |
| Number | Number | Type   | X                       | Y         | Z         |  |
| -----  |        |        |                         |           |           |  |
| 1      | 6      | 0      | 0.000000                | 0.000000  | 0.000000  |  |
| 2      | 8      | 0      | 0.000000                | 0.000000  | 1.432488  |  |
| 3      | 6      | 0      | 1.183246                | 0.000000  | 2.084958  |  |
| 4      | 6      | 0      | 2.433339                | -0.000998 | 1.455466  |  |
| 5      | 6      | 0      | 3.584850                | 0.000545  | 2.227149  |  |
| 6      | 6      | 0      | 3.518197                | 0.002396  | 3.622355  |  |
| 7      | 6      | 0      | 2.259107                | 0.001652  | 4.244269  |  |
| 8      | 6      | 0      | 1.107581                | 0.000830  | 3.485905  |  |
| 9      | 1      | 0      | 0.132244                | 0.001129  | 3.955581  |  |
| 10     | 1      | 0      | 2.186121                | 0.003003  | 5.323061  |  |
| 11     | 6      | 0      | 4.777573                | 0.012235  | 4.377362  |  |
| 12     | 8      | 0      | 5.898884                | 0.018895  | 3.913350  |  |
| 13     | 8      | 0      | 4.565548                | 0.009506  | 5.730537  |  |
| 14     | 7      | 0      | 5.761918                | -0.016691 | 6.465634  |  |
| 15     | 6      | 0      | 5.737598                | 0.640001  | 7.670672  |  |
| 16     | 8      | 0      | 4.708463                | 1.038367  | 8.190357  |  |
| 17     | 6      | 0      | 7.104442                | 0.743914  | 8.317405  |  |
| 18     | 1      | 0      | 7.865008                | 0.266773  | 7.694283  |  |
| 19     | 1      | 0      | 7.048533                | 0.176776  | 9.249499  |  |
| 20     | 6      | 0      | 7.480931                | 2.207841  | 8.595924  |  |
| 21     | 6      | 0      | 8.866346                | 2.391900  | 9.238061  |  |
| 22     | 6      | 0      | 9.217220                | 3.882917  | 9.306828  |  |
| 23     | 1      | 0      | 10.216273               | 4.032273  | 9.723774  |  |
| 24     | 1      | 0      | 9.193432                | 4.343815  | 8.315987  |  |
| 25     | 1      | 0      | 8.506826                | 4.420260  | 9.943071  |  |
| 26     | 6      | 0      | 8.962656                | 1.750791  | 10.627580 |  |

*Supporting Information*

|    |   |   |           |           |           |
|----|---|---|-----------|-----------|-----------|
| 27 | 1 | 0 | 9.952101  | 1.917582  | 11.060609 |
| 28 | 1 | 0 | 8.223786  | 2.186300  | 11.307994 |
| 29 | 1 | 0 | 8.796896  | 0.671832  | 10.598722 |
| 30 | 1 | 0 | 9.603455  | 1.904233  | 8.587801  |
| 31 | 1 | 0 | 7.456505  | 2.762005  | 7.651985  |
| 32 | 1 | 0 | 6.718836  | 2.654983  | 9.241476  |
| 33 | 1 | 0 | 6.567514  | 0.030681  | 5.846898  |
| 34 | 1 | 0 | 4.553641  | 0.000885  | 1.744967  |
| 35 | 1 | 0 | 2.516132  | -0.002115 | 0.378450  |
| 36 | 1 | 0 | -1.046614 | -0.001082 | -0.292134 |
| 37 | 1 | 0 | 0.489258  | 0.894823  | -0.389817 |
| 38 | 1 | 0 | 0.490999  | -0.893881 | -0.389454 |

-----



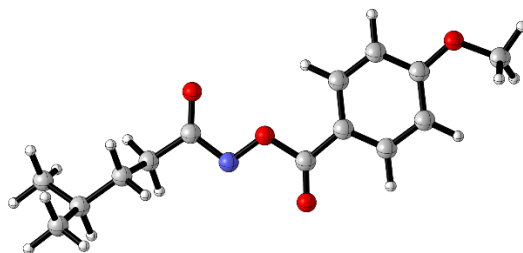

## Vibrational frequency of 1h radical

| Quantity        | Value                                                                                            |
|-----------------|--------------------------------------------------------------------------------------------------|
| Job History     | <a href="#">20370,23453,23465,23475,43197,43199</a>                                              |
| Route           | #N B3LYP/6-311+G(2d,p) FREQ SCRF=(PCM,Solvent=Acetonitrile) Geom=Conne                           |
| Stoichiometry   | C <sub>14</sub> H <sub>18</sub> NO <sub>4</sub> (2)                                              |
| Symmetry        | C1                                                                                               |
| Basis           | 6-311+G(2d,p)                                                                                    |
| UB3LYP Energy   | -900.18925328 Hartree                                                                            |
| ZPE             | 0.299774 Hartree                                                                                 |
| Conditions      | 298.150K, 1.00000 atm                                                                            |
| Internal Energy | -899.869514 Hartree                                                                              |
| Enthalpy        | -899.868570 Hartree                                                                              |
| Free Energy     | -899.942308 Hartree                                                                              |
| C <sub>v</sub>  | 72.402 cal/mol-K                                                                                 |
| Entropy         | 155.196 cal/mol-K                                                                                |
| Dipole Moment   | 4.9703 Debye  |
| Server          | General (68314)                                                                                  |
| CPU time        | 138251.9 sec                                                                                     |

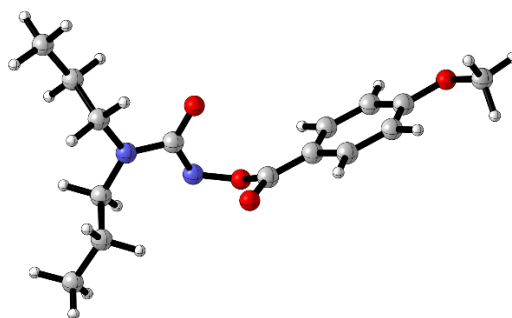

## Vibrational frequency of anionic 1p (triplet)

| Quantity        | Value                                                                  |
|-----------------|------------------------------------------------------------------------|
| Job History     | <a href="#">20370,20385,37254,37256,40582,43019,43020</a>              |
| Route           | #N B3LYP/6-311+G(2d,p) FREQ SCRF=(PCM,Solvent=Acetonitrile) Geom=Conne |
| Stoichiometry   | C <sub>15</sub> H <sub>21</sub> N <sub>2</sub> O <sub>4</sub> (1-,3)   |
| Symmetry        | C1                                                                     |
| Basis           | 6-311+G(2d,p)                                                          |
| UB3LYP Energy   | -994.974027916 Hartree                                                 |
| ZPE             | 0.341705 Hartree                                                       |
| Conditions      | 298.150K, 1.00000 atm                                                  |
| Internal Energy | -994.609506 Hartree                                                    |
| Enthalpy        | -994.608561 Hartree                                                    |
| Free Energy     | -994.687569 Hartree                                                    |
| C <sub>v</sub>  | 83.224 cal/mol-K                                                       |
| Entropy         | 166.286 cal/mol-K                                                      |
| Dipole Moment   | 8.1645 Debye 🔍                                                         |
| Server          | General (67416)                                                        |
| CPU time        | 172639.6 sec                                                           |

# *Supporting Information*

| -----  |        |        |                         |           |          |  |
|--------|--------|--------|-------------------------|-----------|----------|--|
| Center | Atomic | Atomic | Coordinates (Angstroms) |           |          |  |
| Number | Number | Type   | X                       | Y         | Z        |  |
| -----  |        |        |                         |           |          |  |
| 1      | 6      | 0      | 0.000000                | 0.000000  | 0.000000 |  |
| 2      | 8      | 0      | 0.000000                | 0.000000  | 1.420378 |  |
| 3      | 6      | 0      | 1.225533                | 0.000000  | 2.062304 |  |
| 4      | 6      | 0      | 2.469280                | 0.000479  | 1.421119 |  |
| 5      | 6      | 0      | 3.642919                | -0.000588 | 2.160257 |  |
| 6      | 6      | 0      | 3.631793                | -0.001551 | 3.593625 |  |
| 7      | 6      | 0      | 2.339968                | -0.005045 | 4.216482 |  |
| 8      | 6      | 0      | 1.184496                | -0.001859 | 3.470272 |  |
| 9      | 1      | 0      | 0.217364                | -0.000929 | 3.961681 |  |
| 10     | 1      | 0      | 2.270869                | -0.005158 | 5.296346 |  |
| 11     | 6      | 0      | 4.848408                | 0.013788  | 4.296652 |  |
| 12     | 8      | 0      | 6.028770                | 0.043437  | 3.905808 |  |
| 13     | 8      | 0      | 4.647484                | -0.201347 | 5.773641 |  |
| 14     | 7      | 0      | 5.393370                | 0.468680  | 6.662058 |  |
| 15     | 6      | 0      | 5.771025                | 1.787333  | 6.277628 |  |
| 16     | 8      | 0      | 5.053174                | 2.512801  | 5.586500 |  |
| 17     | 7      | 0      | 6.922369                | 2.205208  | 6.866145 |  |
| 18     | 6      | 0      | 7.774887                | 1.347822  | 7.695737 |  |
| 19     | 1      | 0      | 8.182560                | 1.972893  | 8.495102 |  |
| 20     | 1      | 0      | 7.153627                | 0.587423  | 8.165783 |  |
| 21     | 6      | 0      | 8.919198                | 0.680846  | 6.926767 |  |
| 22     | 6      | 0      | 9.820781                | -0.139594 | 7.850241 |  |
| 23     | 1      | 0      | 10.628445               | -0.614700 | 7.289638 |  |
| 24     | 1      | 0      | 10.275366               | 0.488626  | 8.621394 |  |
| 25     | 1      | 0      | 9.256634                | -0.929038 | 8.354529 |  |
| 26     | 1      | 0      | 8.496072                | 0.039428  | 6.149381 |  |
| 27     | 1      | 0      | 9.511310                | 1.446417  | 6.416206 |  |

*Supporting Information*

|    |   |   |           |           |           |
|----|---|---|-----------|-----------|-----------|
| 28 | 6 | 0 | 7.343315  | 3.593182  | 6.667764  |
| 29 | 1 | 0 | 8.435577  | 3.613071  | 6.679063  |
| 30 | 1 | 0 | 7.018221  | 3.910776  | 5.677052  |
| 31 | 6 | 0 | 6.791582  | 4.551822  | 7.727859  |
| 32 | 6 | 0 | 7.277432  | 5.985243  | 7.510770  |
| 33 | 1 | 0 | 6.875032  | 6.656025  | 8.272746  |
| 34 | 1 | 0 | 8.368456  | 6.045486  | 7.557005  |
| 35 | 1 | 0 | 6.964786  | 6.365255  | 6.534236  |
| 36 | 1 | 0 | 5.699372  | 4.517452  | 7.697953  |
| 37 | 1 | 0 | 7.092506  | 4.204811  | 8.721242  |
| 38 | 1 | 0 | 4.595405  | 0.001528  | 1.645579  |
| 39 | 1 | 0 | 2.534652  | 0.001799  | 0.340683  |
| 40 | 1 | 0 | -1.045121 | 0.000739  | -0.303846 |
| 41 | 1 | 0 | 0.492981  | 0.891299  | -0.400936 |
| 42 | 1 | 0 | 0.491691  | -0.892029 | -0.401027 |

-----

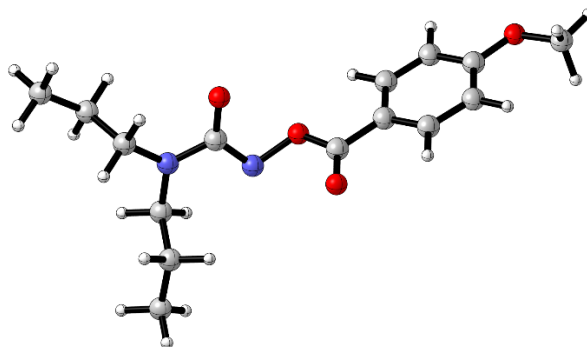

## Vibrational frequency of anionic 1p (singlet)

| Quantity        | Value                                                                                            |
|-----------------|--------------------------------------------------------------------------------------------------|
| Job History     | <a href="#">20370,20385,37254,37256,40582,43019</a>                                              |
| Route           | #N B3LYP/6-311+G(2d,p) FREQ SCRF=(PCM,Solvent=Acetonitrile) Geom=Conne                           |
| Stoichiometry   | C <sub>15</sub> H <sub>21</sub> N <sub>2</sub> O <sub>4</sub> (1-)                               |
| Symmetry        | C1                                                                                               |
| Basis           | 6-311+G(2d,p)                                                                                    |
| RB3LYP Energy   | -995.061093687 Hartree                                                                           |
| ZPE             | 0.344749 Hartree                                                                                 |
| Conditions      | 298.150K, 1.00000 atm                                                                            |
| Internal Energy | -994.693880 Hartree                                                                              |
| Enthalpy        | -994.692936 Hartree                                                                              |
| Free Energy     | -994.772062 Hartree                                                                              |
| C <sub>v</sub>  | 81.054 cal/mol-K                                                                                 |
| Entropy         | 166.534 cal/mol-K                                                                                |
| Dipole Moment   | 6.1381 Debye  |
| Server          | General (67415)                                                                                  |
| CPU time        | 57784.6 sec                                                                                      |

## Supporting Information

Input orientation:

| -----  |        |        |                         |           |          |  |
|--------|--------|--------|-------------------------|-----------|----------|--|
| Center | Atomic | Atomic | Coordinates (Angstroms) |           |          |  |
| Number | Number | Type   | X                       | Y         | Z        |  |
| -----  |        |        |                         |           |          |  |
| 1      | 6      | 0      | 0.000000                | 0.000000  | 0.000000 |  |
| 2      | 8      | 0      | 0.000000                | 0.000000  | 1.429579 |  |
| 3      | 6      | 0      | 1.193395                | 0.000000  | 2.079474 |  |
| 4      | 6      | 0      | 2.438607                | -0.001272 | 1.446001 |  |
| 5      | 6      | 0      | 3.596413                | -0.003518 | 2.215222 |  |
| 6      | 6      | 0      | 3.545116                | -0.001282 | 3.608358 |  |
| 7      | 6      | 0      | 2.288144                | 0.002276  | 4.230191 |  |
| 8      | 6      | 0      | 1.127967                | 0.001261  | 3.478645 |  |
| 9      | 1      | 0      | 0.155783                | 0.000614  | 3.956061 |  |
| 10     | 1      | 0      | 2.224446                | 0.002283  | 5.309582 |  |
| 11     | 6      | 0      | 4.827985                | -0.007007 | 4.373619 |  |
| 12     | 8      | 0      | 5.918917                | -0.105368 | 3.835797 |  |
| 13     | 8      | 0      | 4.617541                | 0.100680  | 5.683493 |  |
| 14     | 7      | 0      | 5.785415                | -0.084789 | 6.543622 |  |
| 15     | 6      | 0      | 6.091123                | 1.109692  | 7.087416 |  |
| 16     | 8      | 0      | 5.592991                | 2.232155  | 6.808632 |  |
| 17     | 7      | 0      | 7.083996                | 1.030095  | 8.072871 |  |
| 18     | 6      | 0      | 7.731178                | -0.224666 | 8.431400 |  |
| 19     | 1      | 0      | 8.048944                | -0.151385 | 9.477738 |  |
| 20     | 1      | 0      | 6.991795                | -1.024706 | 8.379711 |  |
| 21     | 6      | 0      | 8.944140                | -0.596679 | 7.567180 |  |
| 22     | 6      | 0      | 9.602193                | -1.899484 | 8.023811 |  |
| 23     | 1      | 0      | 10.463654               | -2.150393 | 7.400409 |  |
| 24     | 1      | 0      | 9.951809                | -1.826671 | 9.058075 |  |
| 25     | 1      | 0      | 8.900168                | -2.736882 | 7.971156 |  |
| 26     | 1      | 0      | 8.619192                | -0.685348 | 6.527711 |  |

*Supporting Information*

|    |   |   |           |           |           |
|----|---|---|-----------|-----------|-----------|
| 27 | 1 | 0 | 9.677122  | 0.216243  | 7.602062  |
| 28 | 6 | 0 | 7.663274  | 2.254310  | 8.605278  |
| 29 | 1 | 0 | 8.751248  | 2.130740  | 8.665631  |
| 30 | 1 | 0 | 7.467954  | 3.060267  | 7.898422  |
| 31 | 6 | 0 | 7.128008  | 2.651589  | 9.987315  |
| 32 | 6 | 0 | 7.800695  | 3.912991  | 10.530447 |
| 33 | 1 | 0 | 7.407480  | 4.182677  | 11.513369 |
| 34 | 1 | 0 | 8.880993  | 3.773052  | 10.632426 |
| 35 | 1 | 0 | 7.639937  | 4.765119  | 9.863504  |
| 36 | 1 | 0 | 6.047389  | 2.805377  | 9.913457  |
| 37 | 1 | 0 | 7.278954  | 1.823171  | 10.687660 |
| 38 | 1 | 0 | 4.562959  | -0.006631 | 1.728251  |
| 39 | 1 | 0 | 2.516791  | -0.001050 | 0.368387  |
| 40 | 1 | 0 | -1.046342 | 0.000235  | -0.294727 |
| 41 | 1 | 0 | 0.490583  | 0.893603  | -0.392484 |
| 42 | 1 | 0 | 0.490249  | -0.893632 | -0.392994 |

-----

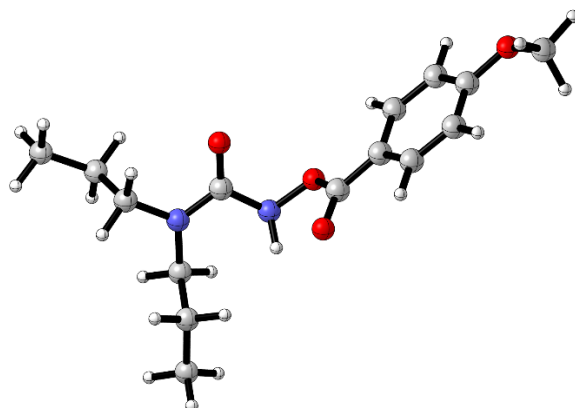

## Vibrational frequency of neutral 1p (triplet)

| Quantity        | Value                                                                                            |
|-----------------|--------------------------------------------------------------------------------------------------|
| Job History     | <a href="#">20370,20385,37254,37256,40582,41038</a>                                              |
| Route           | #N B3LYP/6-311+G(2d,p) FREQ SCRF=(PCM,Solvent=Acetonitrile) Geom=Conne                           |
| Stoichiometry   | C <sub>15</sub> H <sub>22</sub> N <sub>2</sub> O <sub>4</sub> (3)                                |
| Symmetry        | C1                                                                                               |
| Basis           | 6-311+G(2d,p)                                                                                    |
| UB3LYP Energy   | -995.430848351 Hartree                                                                           |
| ZPE             | 0.354867 Hartree                                                                                 |
| Conditions      | 298.150K, 1.00000 atm                                                                            |
| Internal Energy | -995.052591 Hartree                                                                              |
| Enthalpy        | -995.051647 Hartree                                                                              |
| Free Energy     | -995.133360 Hartree                                                                              |
| C <sub>v</sub>  | 84.460 cal/mol-K                                                                                 |
| Entropy         | 171.981 cal/mol-K                                                                                |
| Dipole Moment   | 4.5586 Debye  |
| Server          | 10.72.192.49 (27526)                                                                             |
| CPU time        | 137523.1 sec                                                                                     |

Input orientation:



# *Supporting Information*

| -----  |        |        |                         |           |          |  |
|--------|--------|--------|-------------------------|-----------|----------|--|
| Center | Atomic | Atomic | Coordinates (Angstroms) |           |          |  |
| Number | Number | Type   | X                       | Y         | Z        |  |
| -----  |        |        |                         |           |          |  |
| 1      | 6      | 0      | 0.000000                | 0.000000  | 0.000000 |  |
| 2      | 8      | 0      | 0.000000                | 0.000000  | 1.436900 |  |
| 3      | 6      | 0      | 1.166266                | 0.000000  | 2.100749 |  |
| 4      | 6      | 0      | 2.461378                | 0.005115  | 1.509784 |  |
| 5      | 6      | 0      | 3.569028                | -0.000460 | 2.295943 |  |
| 6      | 6      | 0      | 3.449079                | -0.021306 | 3.769763 |  |
| 7      | 6      | 0      | 2.120582                | -0.011091 | 4.350101 |  |
| 8      | 6      | 0      | 1.031883                | -0.002317 | 3.550334 |  |
| 9      | 1      | 0      | 0.030354                | 0.004056  | 3.962299 |  |
| 10     | 1      | 0      | 2.010879                | -0.011265 | 5.424540 |  |
| 11     | 6      | 0      | 4.640415                | -0.052328 | 4.551526 |  |
| 12     | 8      | 0      | 5.795718                | -0.059294 | 4.117061 |  |
| 13     | 8      | 0      | 4.385191                | -0.116292 | 5.927892 |  |
| 14     | 7      | 0      | 5.541363                | -0.013103 | 6.720695 |  |
| 15     | 6      | 0      | 5.864064                | 1.346022  | 7.026460 |  |
| 16     | 8      | 0      | 5.098636                | 2.264610  | 6.759079 |  |
| 17     | 7      | 0      | 7.039155                | 1.495478  | 7.685278 |  |
| 18     | 6      | 0      | 7.899255                | 0.378127  | 8.091807 |  |
| 19     | 1      | 0      | 8.358193                | 0.655194  | 9.043628 |  |
| 20     | 1      | 0      | 7.276751                | -0.494299 | 8.295757 |  |
| 21     | 6      | 0      | 8.996322                | 0.030478  | 7.079531 |  |
| 22     | 6      | 0      | 9.895550                | -1.099988 | 7.580933 |  |
| 23     | 1      | 0      | 10.669438               | -1.337723 | 6.848651 |  |
| 24     | 1      | 0      | 10.393130               | -0.824100 | 8.514581 |  |
| 25     | 1      | 0      | 9.320534                | -2.011179 | 7.766427 |  |
| 26     | 1      | 0      | 8.542618                | -0.253192 | 6.124661 |  |
| 27     | 1      | 0      | 9.596297                | 0.923146  | 6.880353 |  |

*Supporting Information*

|    |   |   |           |           |           |
|----|---|---|-----------|-----------|-----------|
| 28 | 6 | 0 | 7.460378  | 2.849767  | 8.059204  |
| 29 | 1 | 0 | 8.551306  | 2.879811  | 8.004535  |
| 30 | 1 | 0 | 7.076090  | 3.543169  | 7.312022  |
| 31 | 6 | 0 | 6.992029  | 3.272412  | 9.454051  |
| 32 | 6 | 0 | 7.480538  | 4.674737  | 9.818800  |
| 33 | 1 | 0 | 7.137340  | 4.962681  | 10.814545 |
| 34 | 1 | 0 | 8.572842  | 4.727651  | 9.814904  |
| 35 | 1 | 0 | 7.108916  | 5.419892  | 9.110188  |
| 36 | 1 | 0 | 5.899752  | 3.235938  | 9.484443  |
| 37 | 1 | 0 | 7.353248  | 2.551392  | 10.193822 |
| 38 | 1 | 0 | 6.292577  | -0.489910 | 6.226318  |
| 39 | 1 | 0 | 4.559526  | 0.006211  | 1.866185  |
| 40 | 1 | 0 | 2.569699  | 0.015607  | 0.433697  |
| 41 | 1 | 0 | -1.046159 | -0.003428 | -0.290631 |
| 42 | 1 | 0 | 0.490562  | 0.896900  | -0.379926 |
| 43 | 1 | 0 | 0.496673  | -0.893641 | -0.379849 |

-----

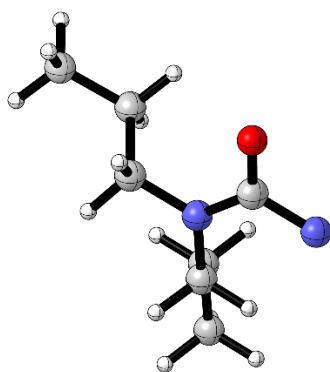

### Vibrational frequency of nitrene 1p (triplet)

| Quantity        | Value                                                                  |
|-----------------|------------------------------------------------------------------------|
| Job History     | <a href="#">20370,20382,20416,37250,37252,40581</a>                    |
| Route           | #N B3LYP/6-311+G(2d,p) FREQ SCRF=(PCM,Solvent=Acetonitrile) Geom=Conne |
| Stoichiometry   | C <sub>7</sub> H <sub>14</sub> N <sub>2</sub> O(3)                     |
| Symmetry        | C1                                                                     |
| Basis           | 6-311+G(2d,p)                                                          |
| UB3LYP Energy   | -459.965682017 Hartree                                                 |
| ZPE             | 0.206760 Hartree                                                       |
| Conditions      | 298.150K, 1.00000 atm                                                  |
| Internal Energy | -459.746817 Hartree                                                    |
| Enthalpy        | -459.745872 Hartree                                                    |
| Free Energy     | -459.798765 Hartree                                                    |
| C <sub>v</sub>  | 42.509 cal/mol-K                                                       |
| Entropy         | 111.322 cal/mol-K                                                      |
| Dipole Moment   | 6.9519 Debye 🔍                                                         |
| Server          | 10.72.192.49 (9017)                                                    |
| CPU time        | 8678.3 sec                                                             |

## Supporting Information

Input orientation:

| -----  |        |        |                         |           |           |  |
|--------|--------|--------|-------------------------|-----------|-----------|--|
| Center | Atomic | Atomic | Coordinates (Angstroms) |           |           |  |
| Number | Number | Type   | X                       | Y         | Z         |  |
| -----  |        |        |                         |           |           |  |
| 1      | 6      | 0      | 0.000000                | 0.000000  | 0.000000  |  |
| 2      | 7      | 0      | 0.000000                | 0.000000  | 1.468465  |  |
| 3      | 6      | 0      | 1.145661                | 0.000000  | 2.181806  |  |
| 4      | 7      | 0      | 2.352798                | 0.059300  | 1.497850  |  |
| 5      | 8      | 0      | 1.222740                | -0.049254 | 3.421474  |  |
| 6      | 6      | 0      | -1.271939               | -0.081637 | 2.194852  |  |
| 7      | 6      | 0      | -1.739250               | 1.249206  | 2.797444  |  |
| 8      | 6      | 0      | -3.046827               | 1.079813  | 3.571886  |  |
| 9      | 1      | 0      | -3.373004               | 2.032427  | 3.993667  |  |
| 10     | 1      | 0      | -3.846953               | 0.709902  | 2.925146  |  |
| 11     | 1      | 0      | -2.929283               | 0.372255  | 4.396797  |  |
| 12     | 1      | 0      | -0.959848               | 1.631707  | 3.459886  |  |
| 13     | 1      | 0      | -1.870488               | 1.983650  | 1.999354  |  |
| 14     | 1      | 0      | -2.016280               | -0.465075 | 1.495448  |  |
| 15     | 1      | 0      | -1.150136               | -0.817936 | 2.992649  |  |
| 16     | 6      | 0      | -0.483845               | 1.309907  | -0.625523 |  |
| 17     | 6      | 0      | -0.438238               | 1.247577  | -2.152846 |  |
| 18     | 1      | 0      | -0.786135               | 2.185740  | -2.588891 |  |
| 19     | 1      | 0      | 0.578516                | 1.068560  | -2.512060 |  |
| 20     | 1      | 0      | -1.074680               | 0.445561  | -2.535754 |  |
| 21     | 1      | 0      | -1.504859               | 1.521799  | -0.298124 |  |
| 22     | 1      | 0      | 0.143554                | 2.128639  | -0.262033 |  |
| 23     | 1      | 0      | 1.015018                | -0.215869 | -0.335465 |  |
| 24     | 1      | 0      | -0.630951               | -0.831314 | -0.327450 |  |
| -----  |        |        |                         |           |           |  |

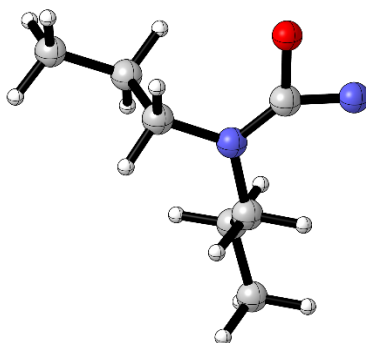

### Vibrational frequency of nitrene 1p (singlet)

| Quantity        | Value                                                                                            |
|-----------------|--------------------------------------------------------------------------------------------------|
| Job History     | <a href="#">20370,20382,20416,37250,37252,40581,40847,42883,42886</a>                            |
| Route           | #N B3LYP/6-311+G(2d,p) FREQ SCRF=(PCM,Solvent=Acetonitrile) Geom=Conne                           |
| Stoichiometry   | C <sub>7</sub> H <sub>14</sub> N <sub>2</sub> O                                                  |
| Symmetry        | C1                                                                                               |
| Basis           | 6-311+G(2d,p)                                                                                    |
| RB3LYP Energy   | -459.951776226 Hartree                                                                           |
| ZPE             | 0.207153 Hartree                                                                                 |
| Conditions      | 298.150K, 1.00000 atm                                                                            |
| Internal Energy | -459.732259 Hartree                                                                              |
| Enthalpy        | -459.731315 Hartree                                                                              |
| Free Energy     | -459.784642 Hartree                                                                              |
| C <sub>v</sub>  | 42.649 cal/mol-K                                                                                 |
| Entropy         | 112.237 cal/mol-K                                                                                |
| Dipole Moment   | 7.4145 Debye  |
| Server          | General (66802)                                                                                  |
| CPU time        | 3396.1 sec                                                                                       |

## Supporting Information

Input orientation:

| -----  |        |        |                         |           |           |  |
|--------|--------|--------|-------------------------|-----------|-----------|--|
| Center | Atomic | Atomic | Coordinates (Angstroms) |           |           |  |
| Number | Number | Type   | X                       | Y         | Z         |  |
| -----  |        |        |                         |           |           |  |
| 1      | 6      | 0      | 0.000000                | 0.000000  | 0.000000  |  |
| 2      | 7      | 0      | 0.000000                | 0.000000  | 1.471179  |  |
| 3      | 6      | 0      | 1.153932                | 0.000000  | 2.103188  |  |
| 4      | 7      | 0      | 2.422072                | 0.038088  | 1.899005  |  |
| 5      | 8      | 0      | 1.445369                | -0.059049 | 3.376245  |  |
| 6      | 6      | 0      | -1.249390               | -0.105714 | 2.245158  |  |
| 7      | 6      | 0      | -1.798805               | 1.230541  | 2.749653  |  |
| 8      | 6      | 0      | -3.084161               | 1.037103  | 3.555337  |  |
| 9      | 1      | 0      | -3.465538               | 1.995015  | 3.913537  |  |
| 10     | 1      | 0      | -3.866084               | 0.572542  | 2.948692  |  |
| 11     | 1      | 0      | -2.913474               | 0.398888  | 4.426410  |  |
| 12     | 1      | 0      | -1.039661               | 1.715119  | 3.369685  |  |
| 13     | 1      | 0      | -1.986407               | 1.894905  | 1.903053  |  |
| 14     | 1      | 0      | -1.975466               | -0.601775 | 1.598385  |  |
| 15     | 1      | 0      | -1.065283               | -0.772674 | 3.090245  |  |
| 16     | 6      | 0      | -0.456683               | 1.314364  | -0.632464 |  |
| 17     | 6      | 0      | -0.374801               | 1.256610  | -2.158511 |  |
| 18     | 1      | 0      | -0.708375               | 2.197121  | -2.600564 |  |
| 19     | 1      | 0      | 0.649631                | 1.074242  | -2.493637 |  |
| 20     | 1      | 0      | -1.004815               | 0.458065  | -2.559168 |  |
| 21     | 1      | 0      | -1.484051               | 1.530568  | -0.329074 |  |
| 22     | 1      | 0      | 0.166132                | 2.128714  | -0.251845 |  |
| 23     | 1      | 0      | 1.017006                | -0.234178 | -0.323152 |  |
| 24     | 1      | 0      | -0.637527               | -0.824471 | -0.330241 |  |
| -----  |        |        |                         |           |           |  |

*BDE calculation for carbamoyl precursor 1p*

$$\text{BDE} = [\Delta H(\text{radical}) + \Delta H(\text{hydrogen})] - \Delta H(\text{precursor})$$

$$\text{BDE} = [-994.528211 + (-0.499817)] - (-995.163809)$$

$$\text{BDE} = 0.135781 \text{ Hartree}$$

$$\text{BDE} = 85.2 \text{ kcal/mol}$$

BDE for the urea derived substrates was calculated to be 85.2 kcal/mol

*BDE calculation for amide precursor 1h*

$$\text{BDE} = [\Delta H(\text{radical}) + \Delta H(\text{hydrogen})] - \Delta H(\text{precursor})$$

$$\text{BDE} = [-899.868570 + (-0.499817)] - (-900.514168)$$

$$\text{BDE} = 0.145781 \text{ Hartree}$$

$$\text{BDE} = 91.5 \text{ kcal/mol}$$

BDE for the amide derived substrates was calculated to be 91.5 kcal/mol

*E<sub>T</sub> calculation from neutral 1p*

$$E_T = T^1 - S^0$$

$$E_T = -995.133360 - -995.242439$$

$$E_T = 0.109079$$

$$E_T = 68.4 \text{ kcal/mol}$$

Energy transfer (EnT) to the neutral urea precursor was calculated to be 68.4 kcal/mol

*E<sub>T</sub> calculation from anionic 1p*

$$E_T = T^1 - S^0$$

$$E_T = -994.687569 - -994.772062$$

$$E_T = 0.084493$$

$$E_T = 53.0 \text{ kcal/mol}$$

Energy transfer (EnT) to the neutral urea precursor was calculated to be 53.0 kcal/mol

*Triplet vs singlet nitrene energy from 1p*

$$\Delta G = T^1 - S^0$$

$$\Delta G = -459.798765 - (-459.784642)$$

$$\Delta G = -0.014123$$

$$\Delta G = -8.9 \text{ kcal/mol}$$

Triplet nitrene was calculated to be 8.9 kcal/mol lower in energy to the singlet nitrene





## NMR Spectra

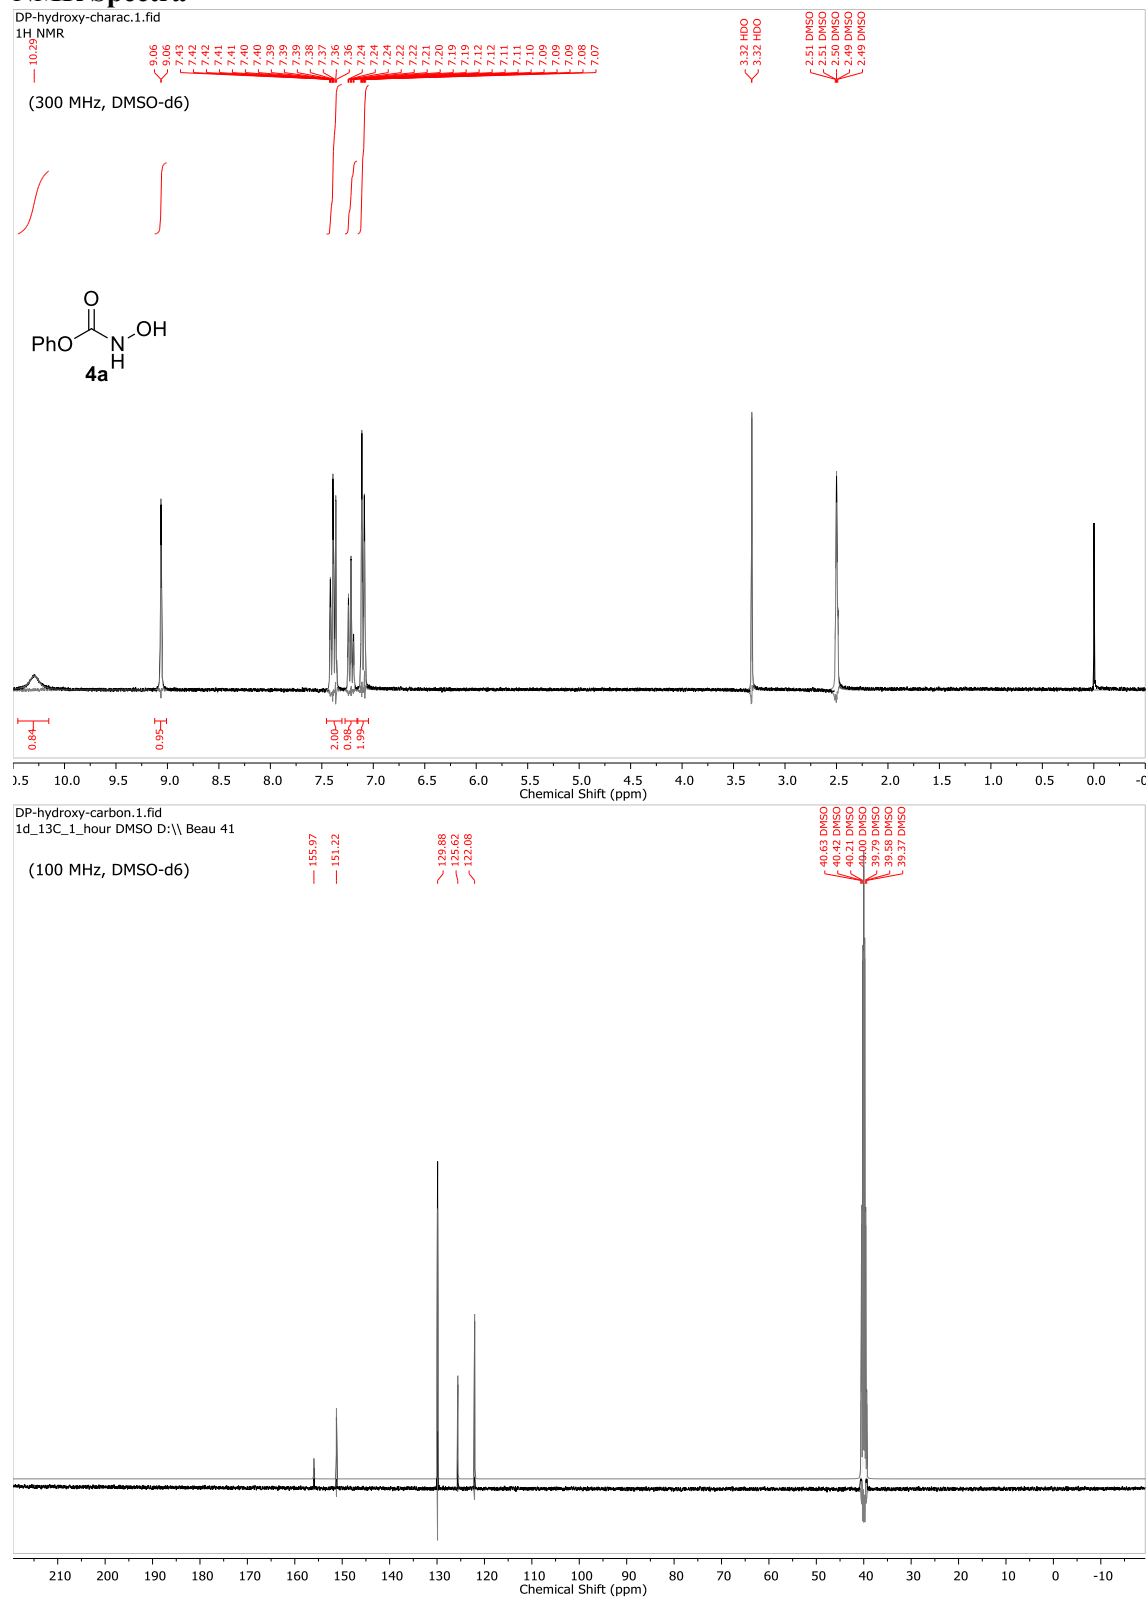

# Supporting Information

<sup>1</sup>H NMR (300 MHz; CDCl<sub>3</sub>):

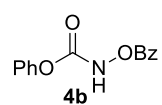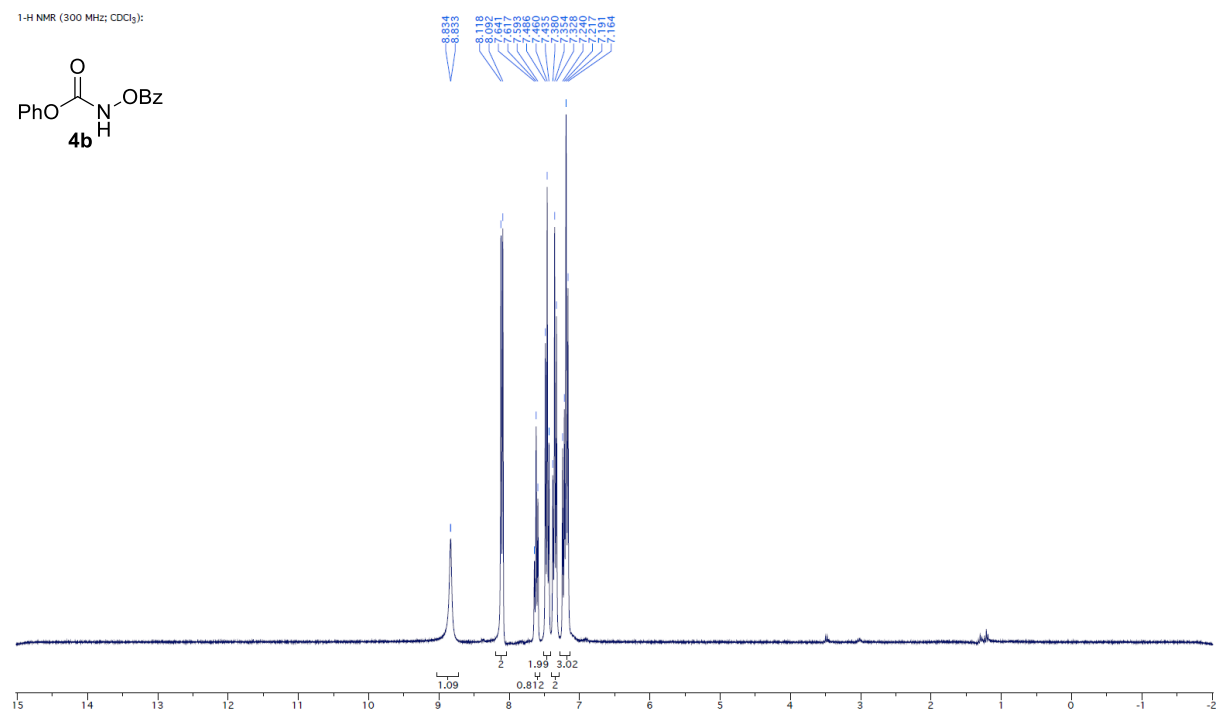

<sup>13</sup>C NMR (75 MHz; CDCl<sub>3</sub>):

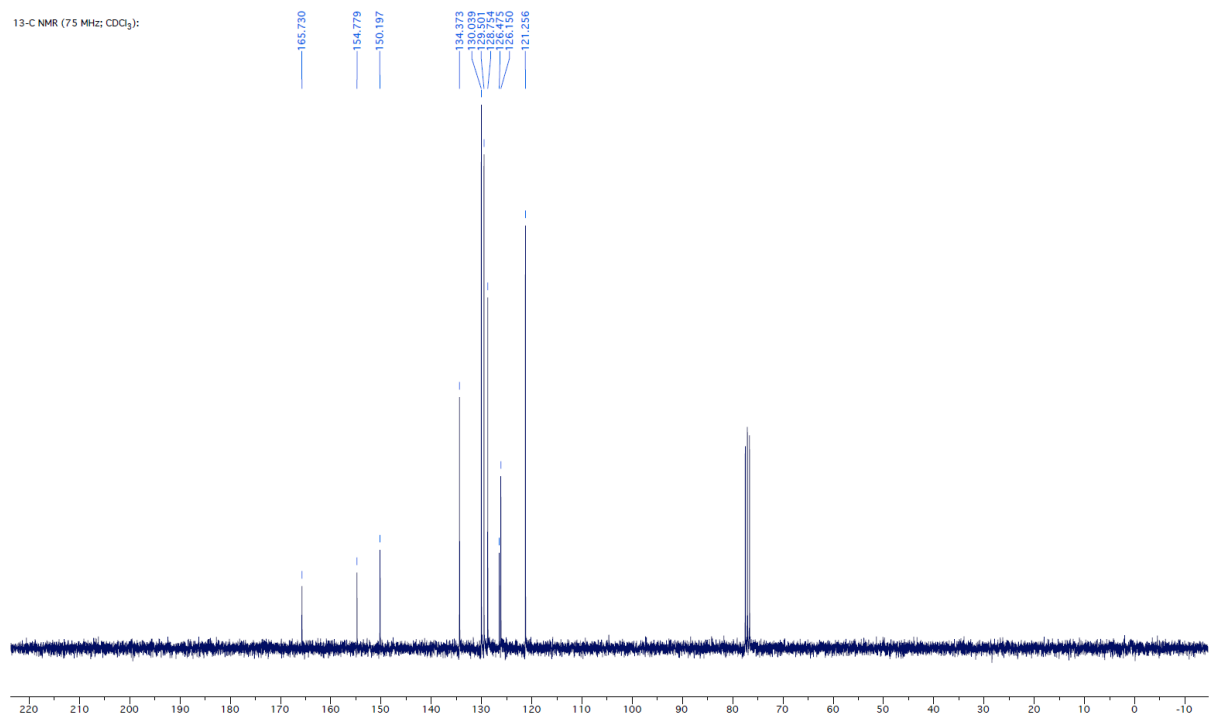

# Supporting Information

<sup>1</sup>H NMR (300 MHz; CDCl<sub>3</sub>):

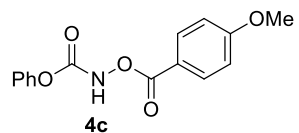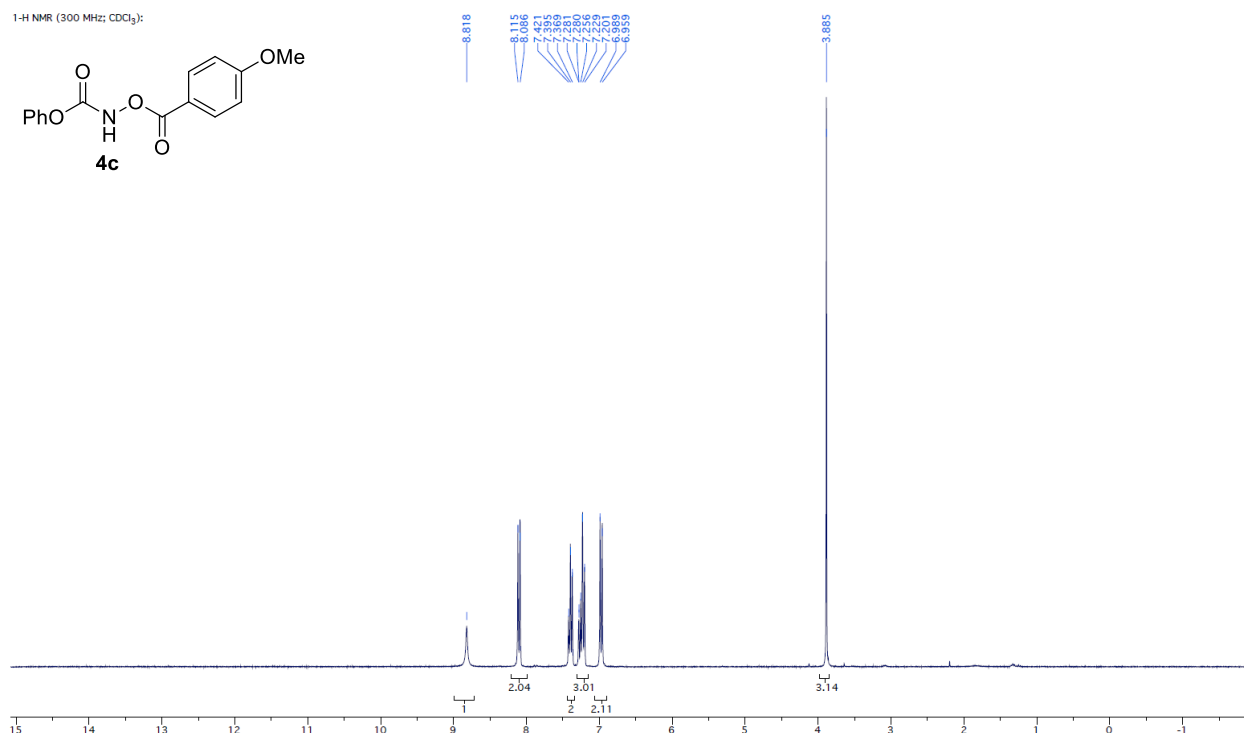

# Supporting Information

<sup>1</sup>H NMR (300 MHz; CDCl<sub>3</sub>):

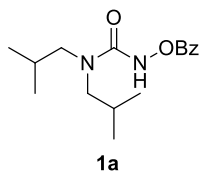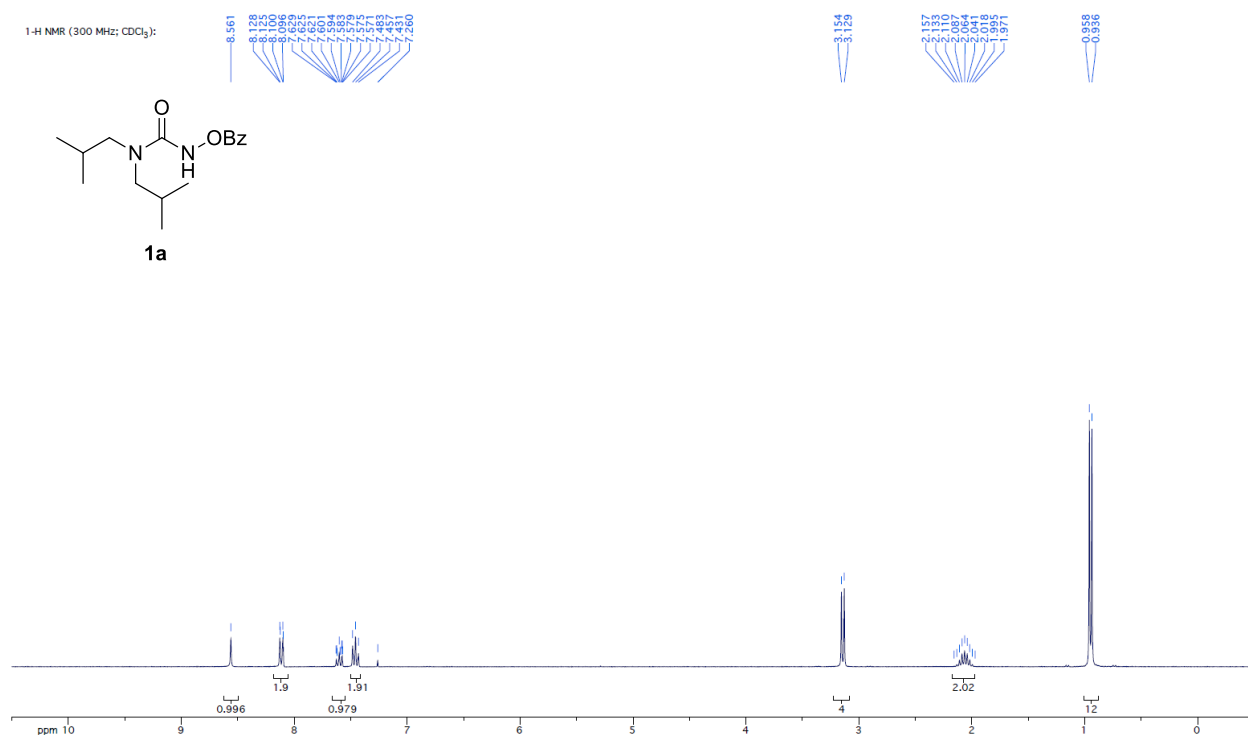

<sup>13</sup>C NMR (75 MHz; CDCl<sub>3</sub>):

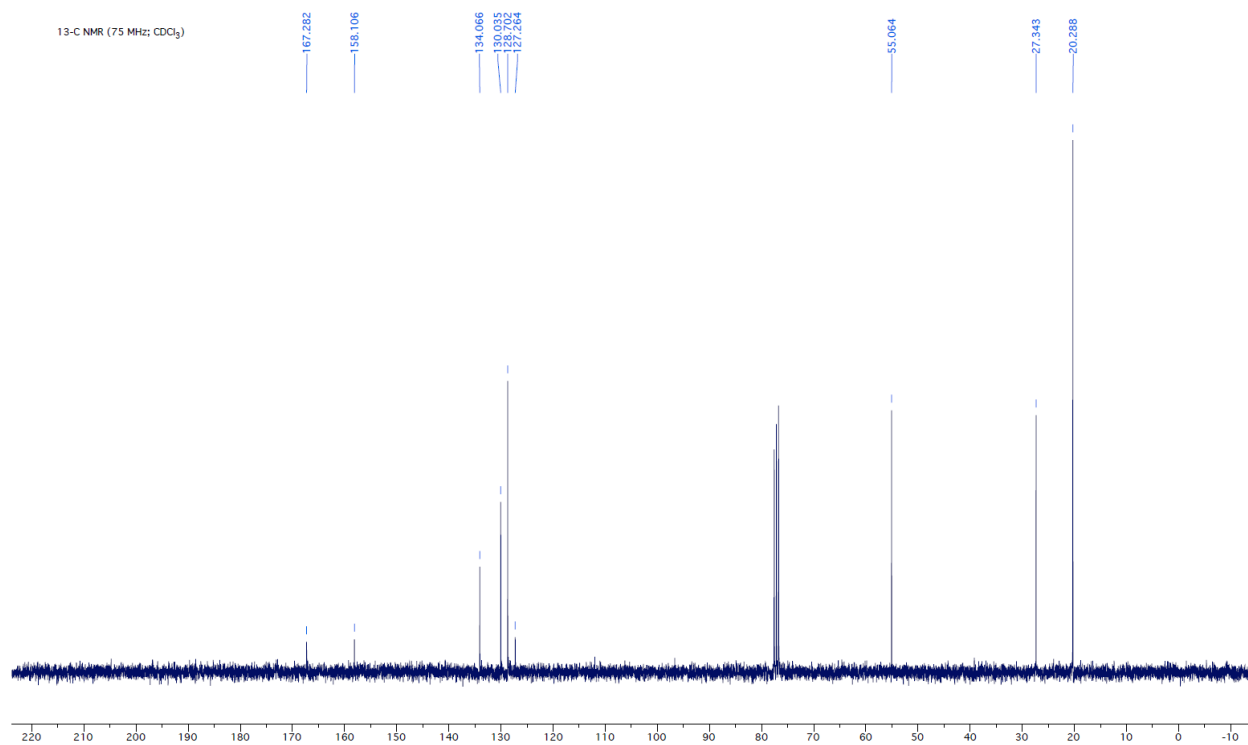

# Supporting Information

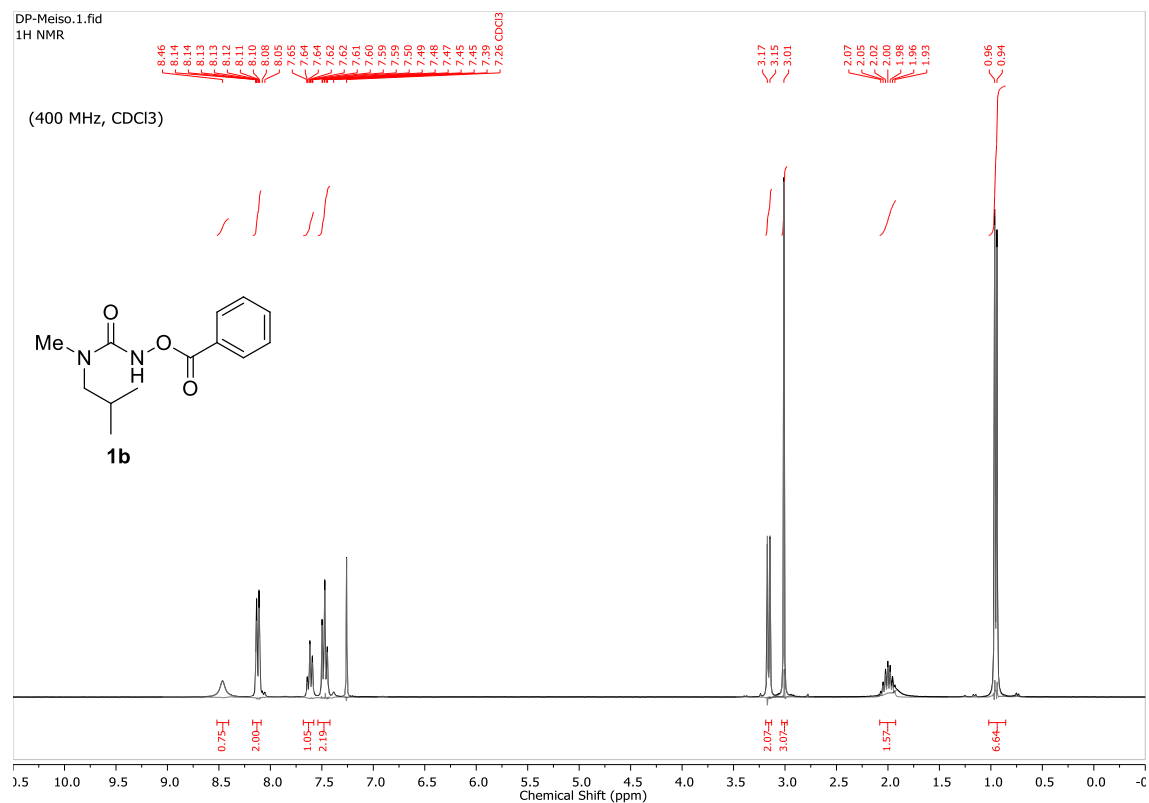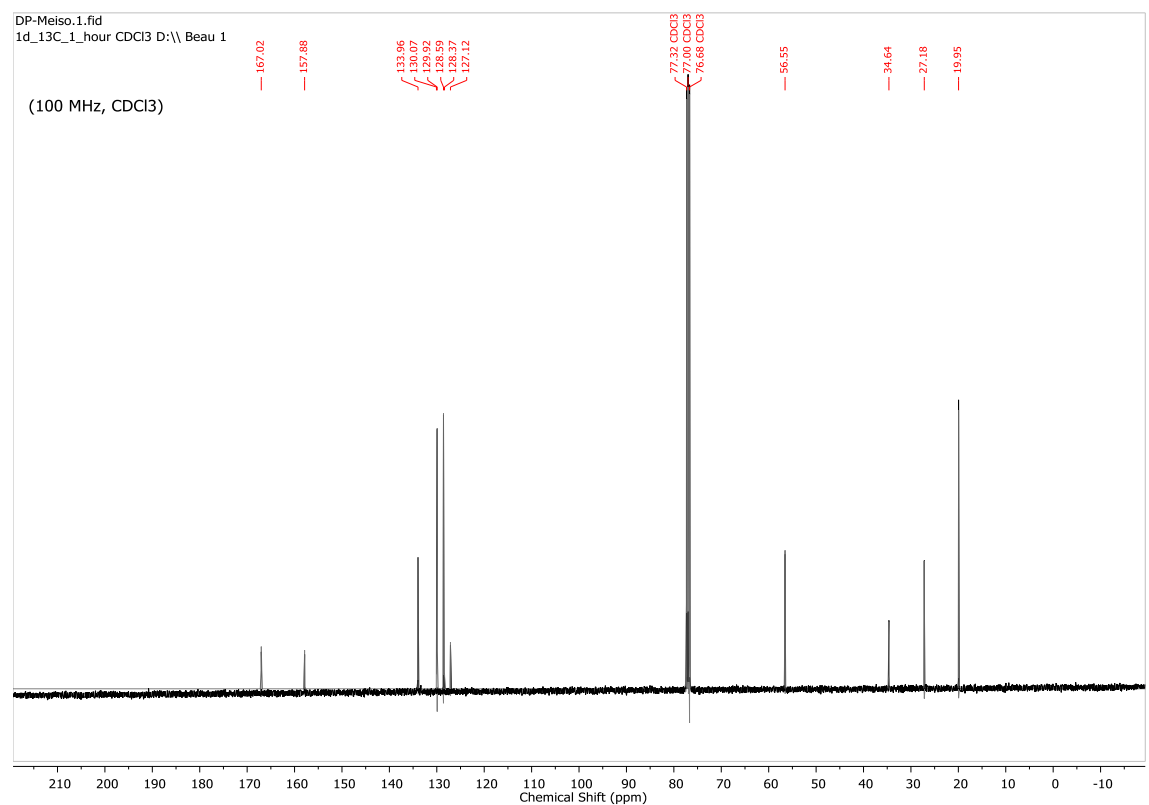

# Supporting Information

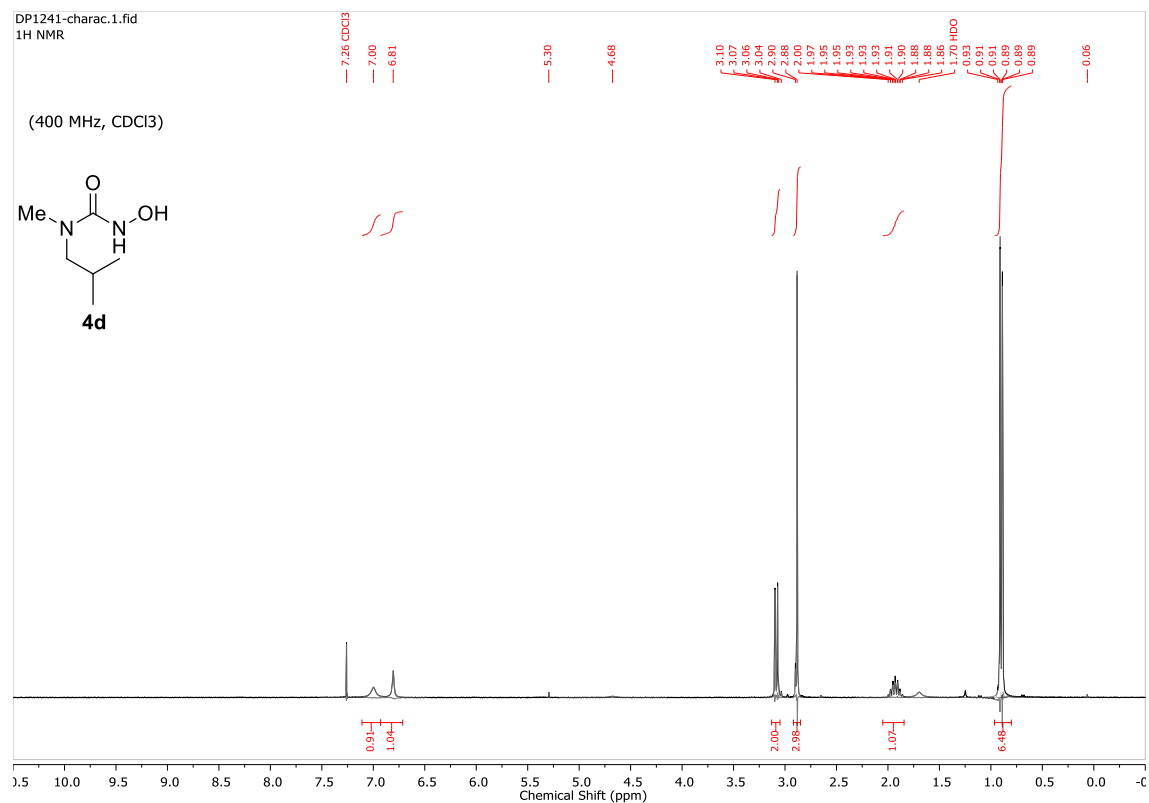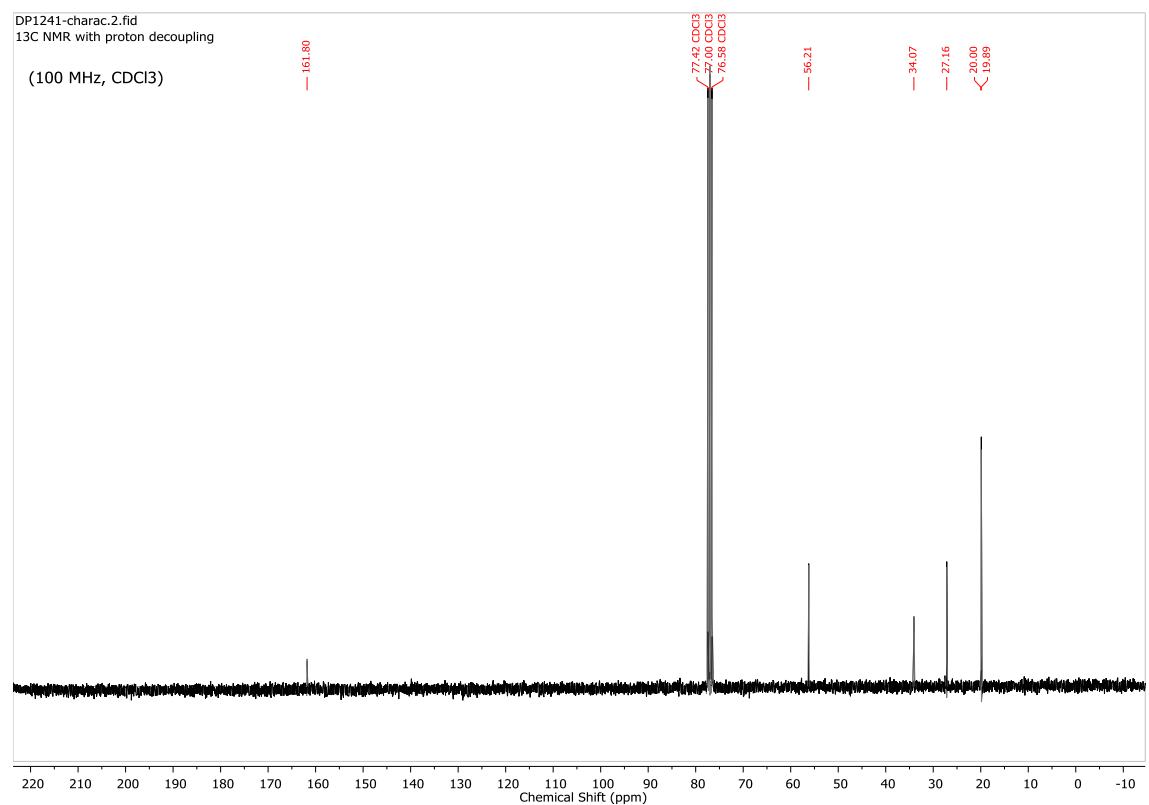

# Supporting Information

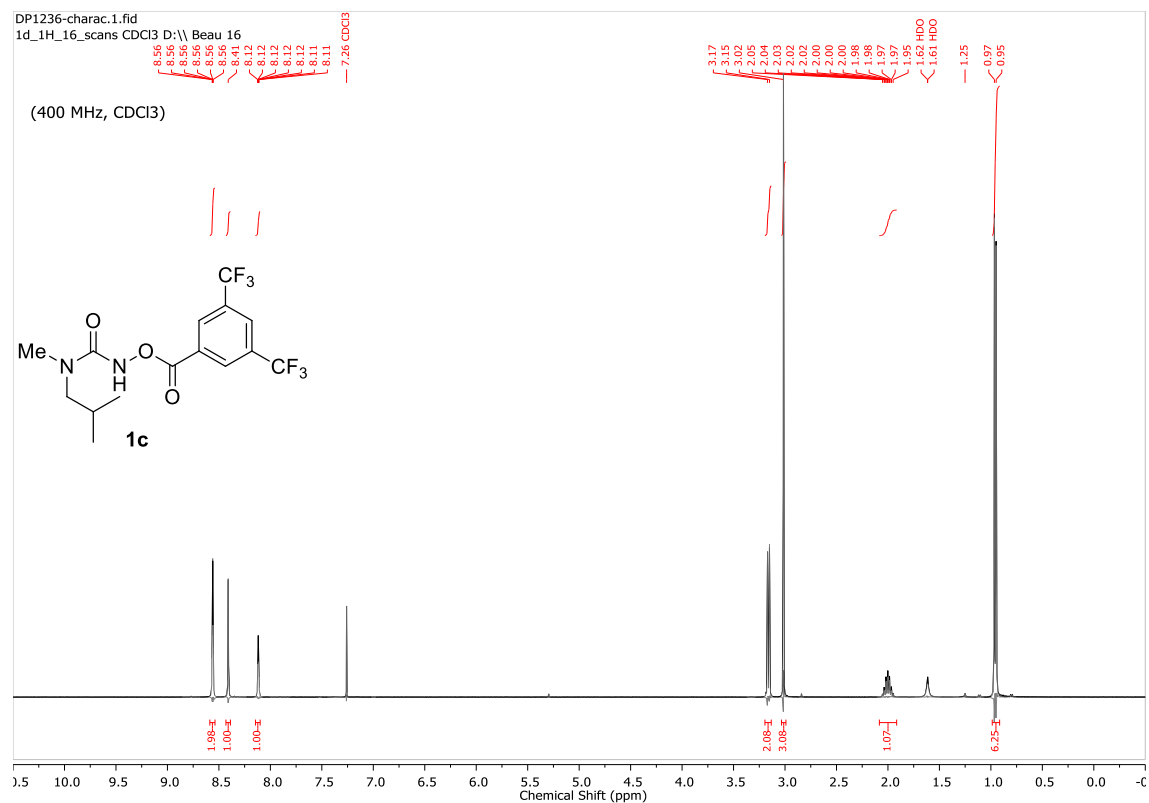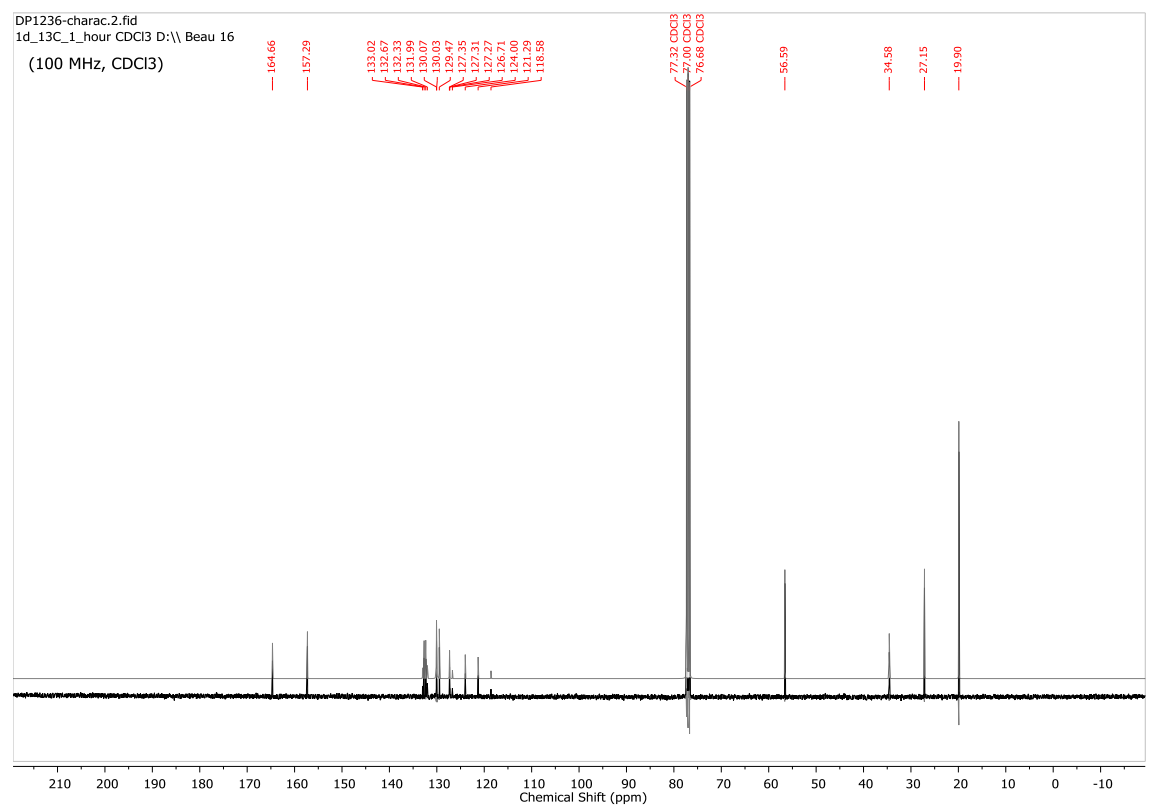

## Supporting Information

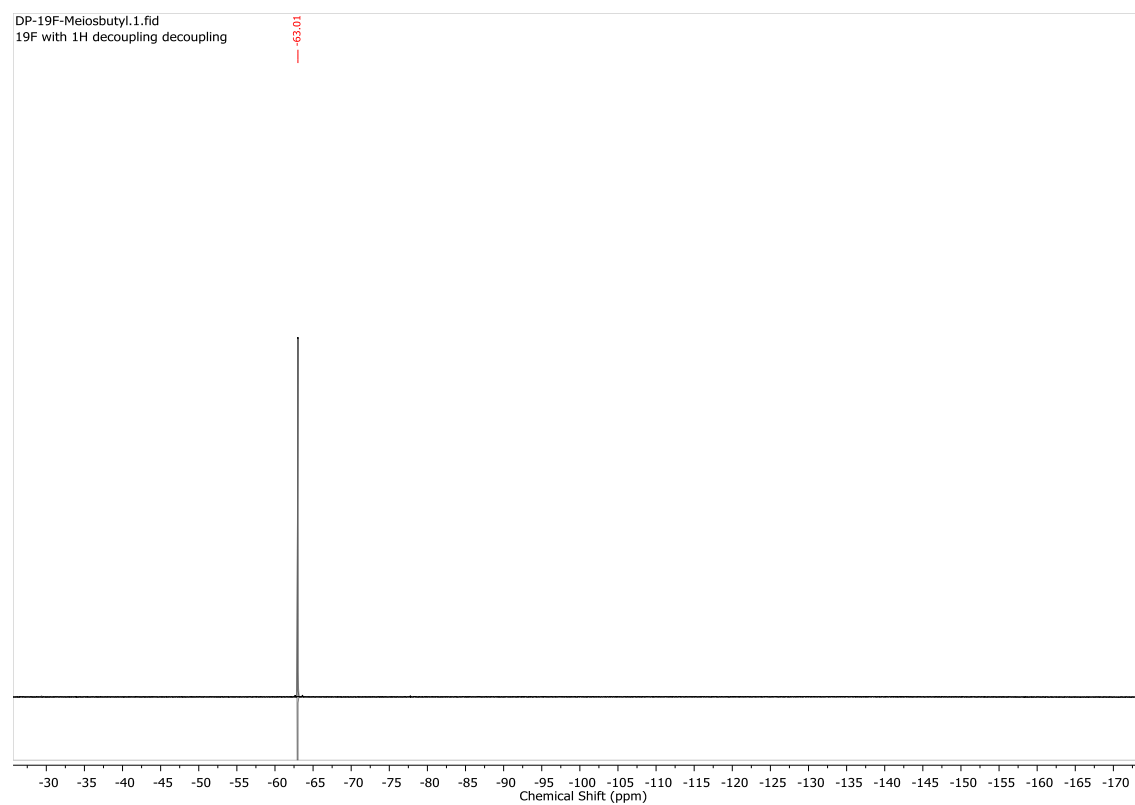



# Supporting Information

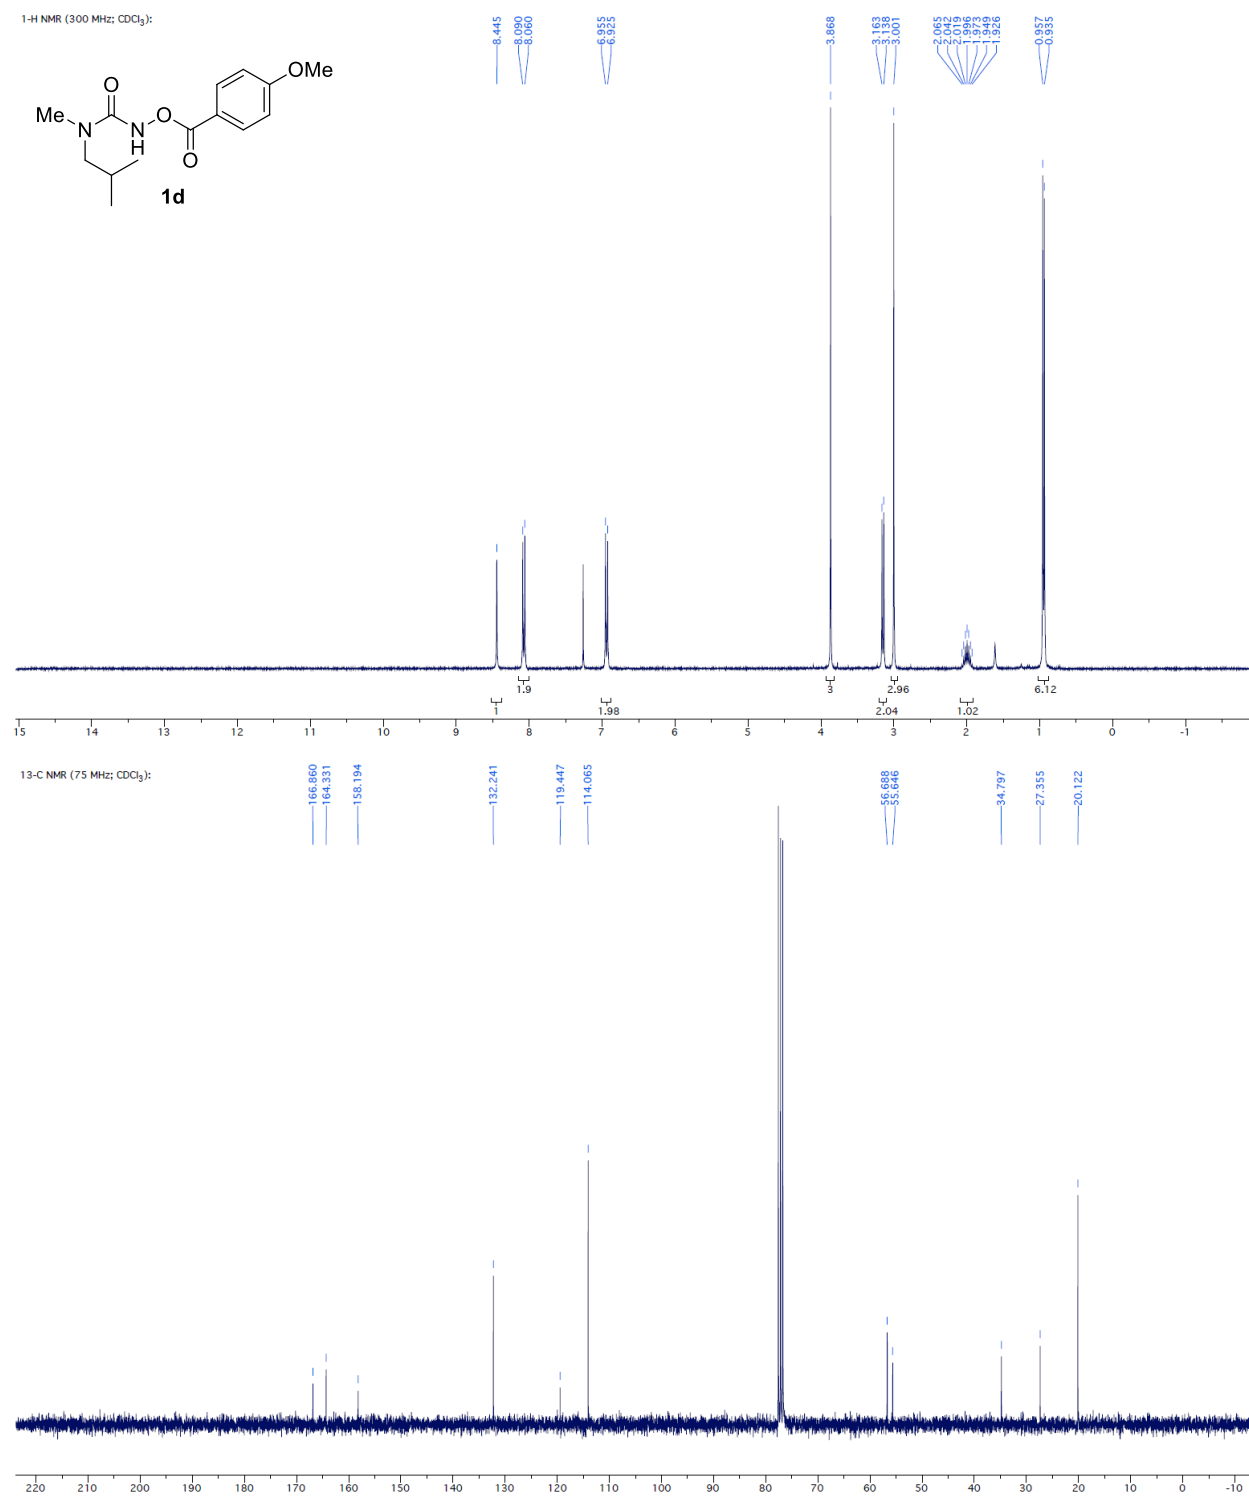

# Supporting Information

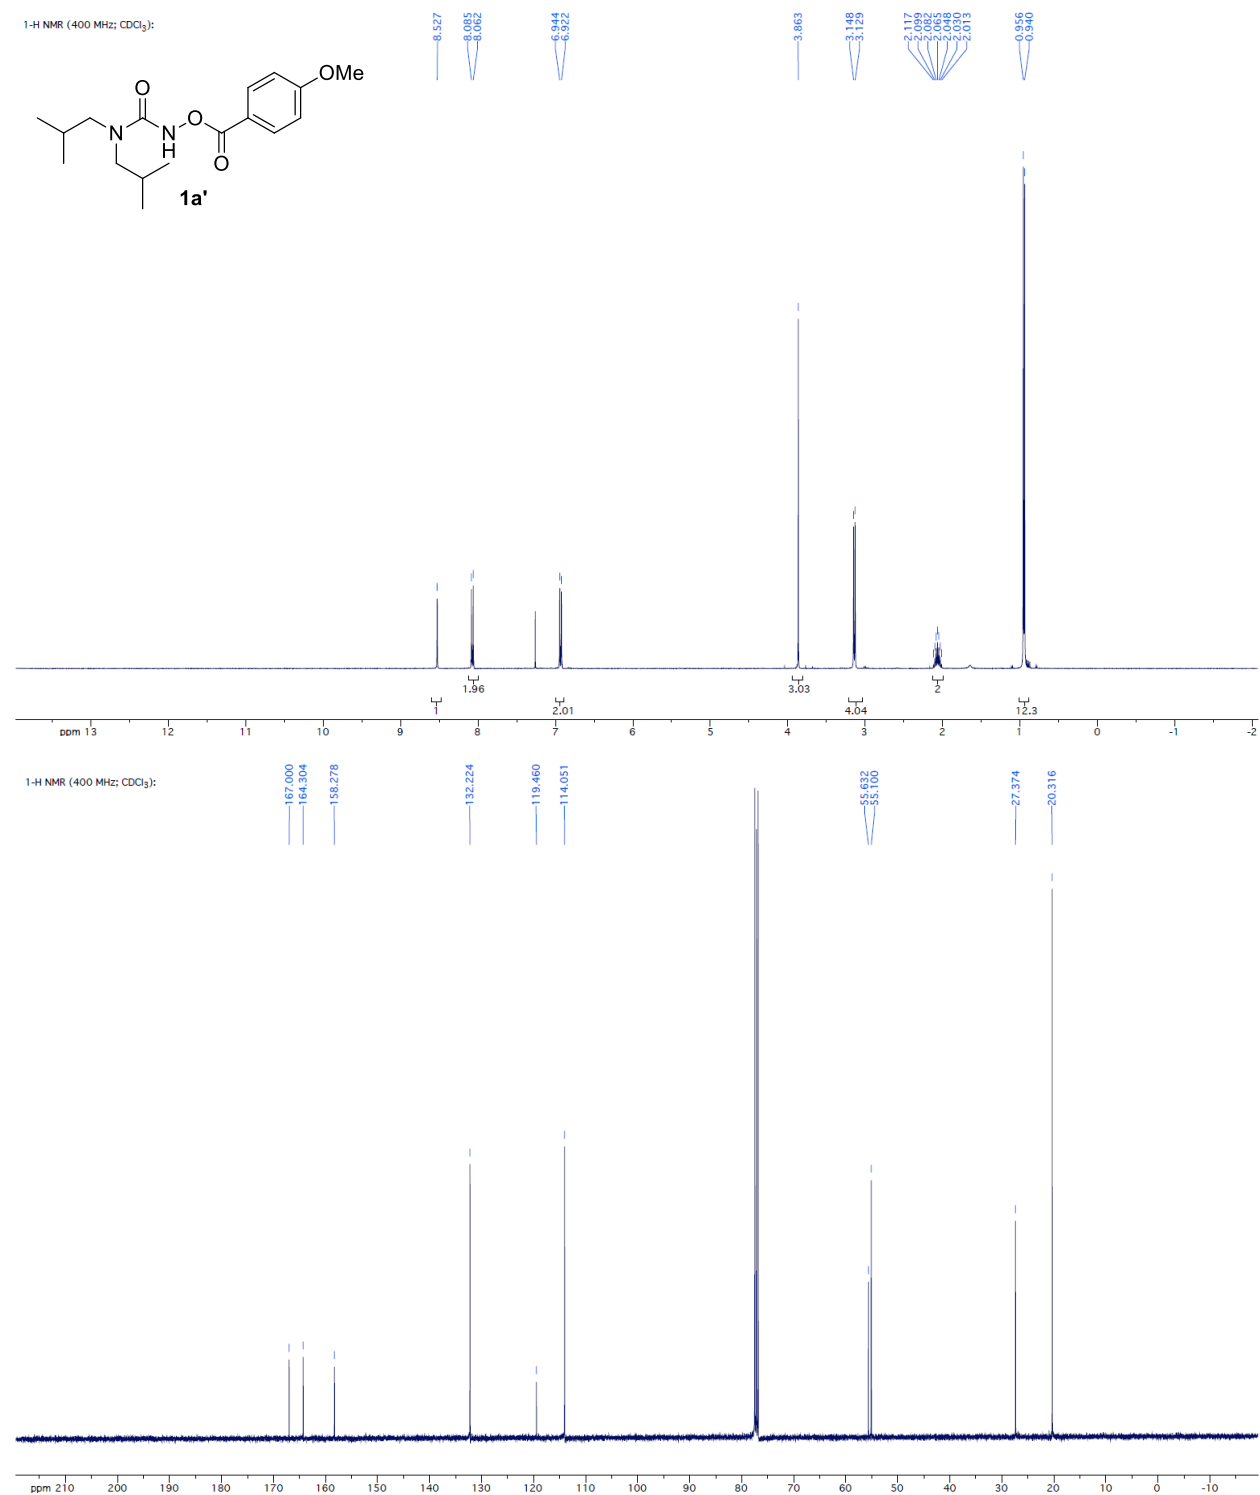

<sup>1</sup>H NMR (300 MHz; DMSO):

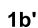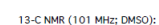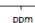

# Supporting Information

<sup>1</sup>H NMR (400 MHz; CDCl<sub>3</sub>):

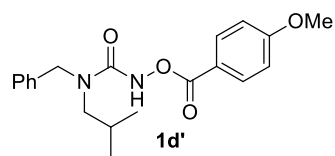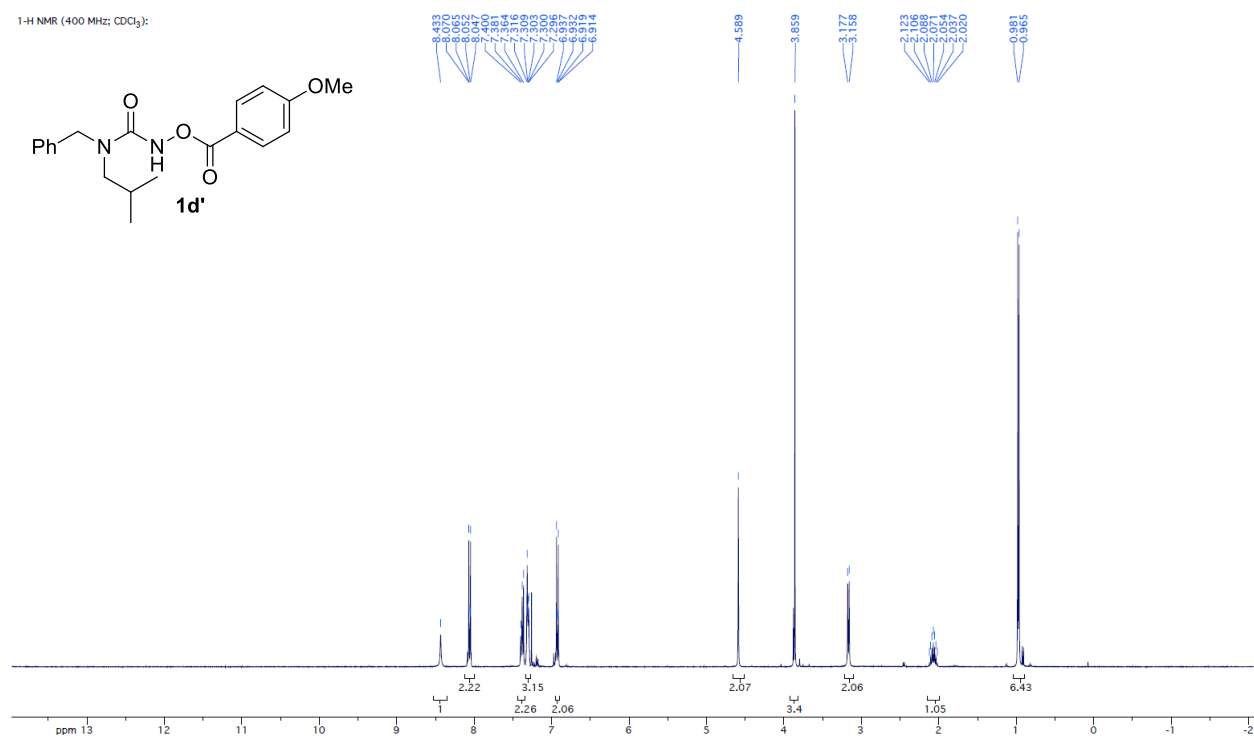

<sup>13</sup>C NMR (101 MHz; CDCl<sub>3</sub>):

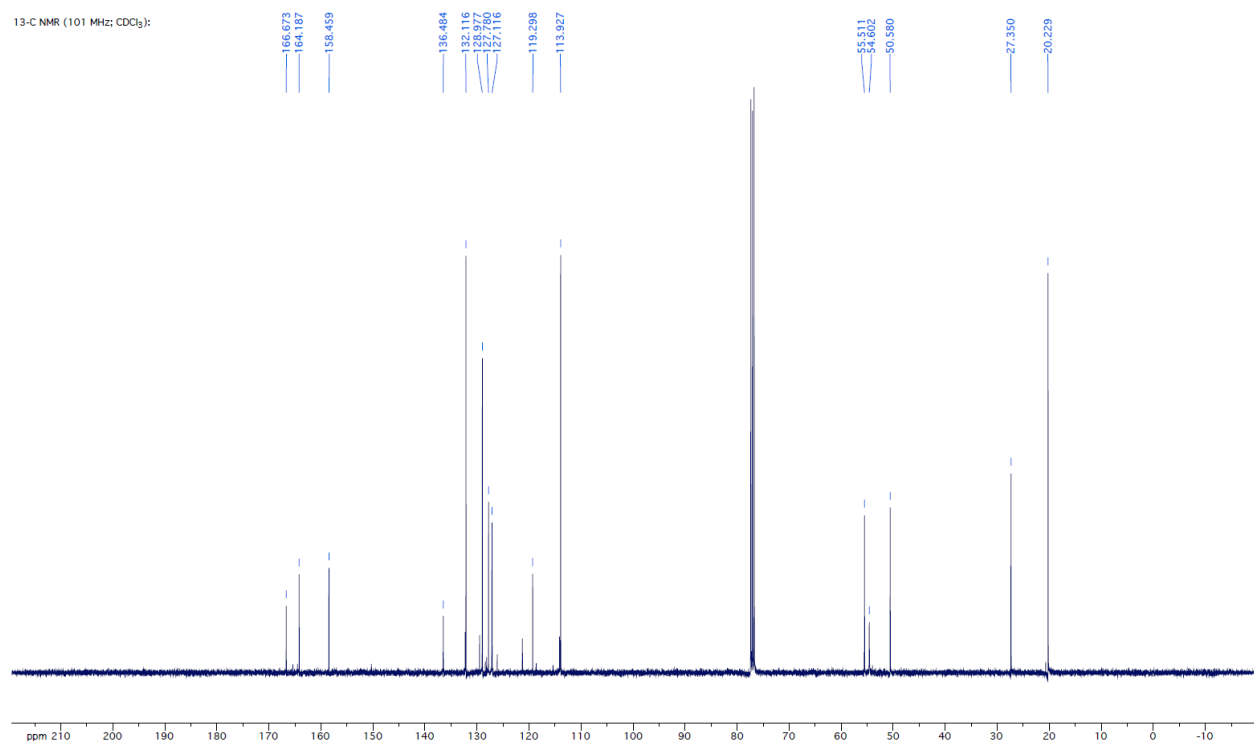

<sup>1</sup>H NMR (400 MHz; CDCl<sub>3</sub>):

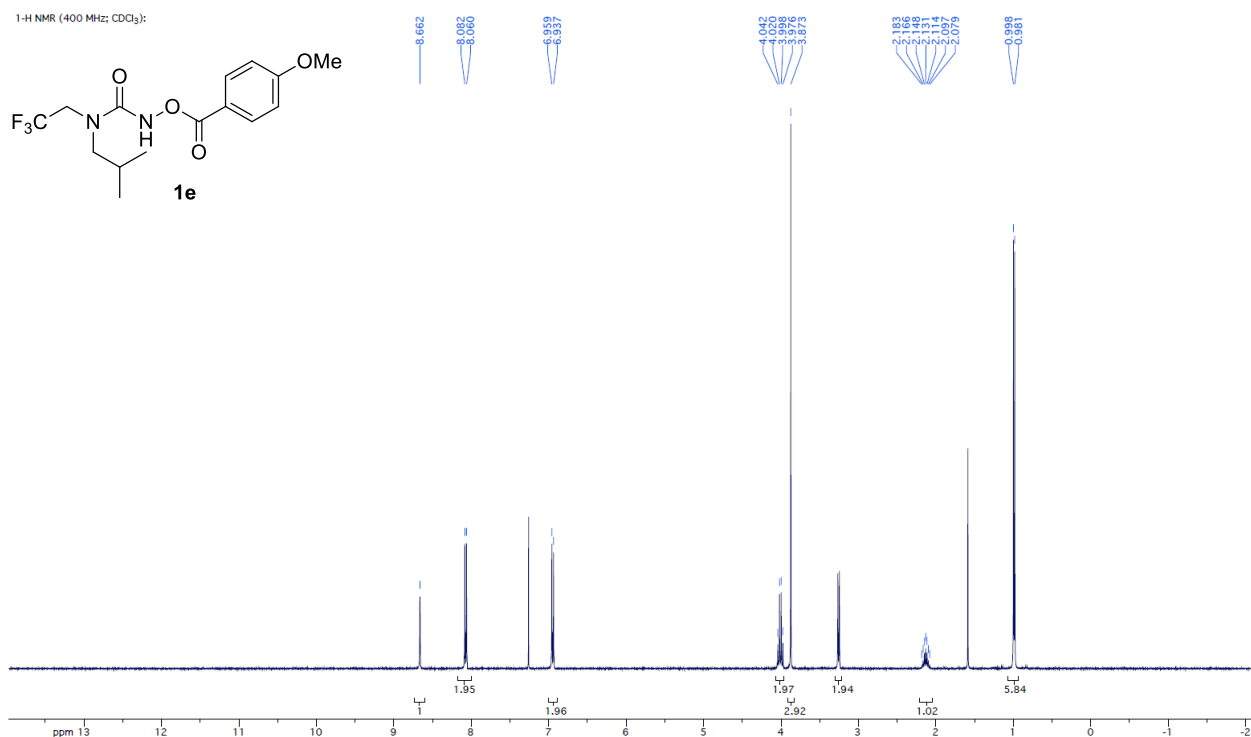

1-H NMR (400 MHz; CDCl<sub>3</sub>):

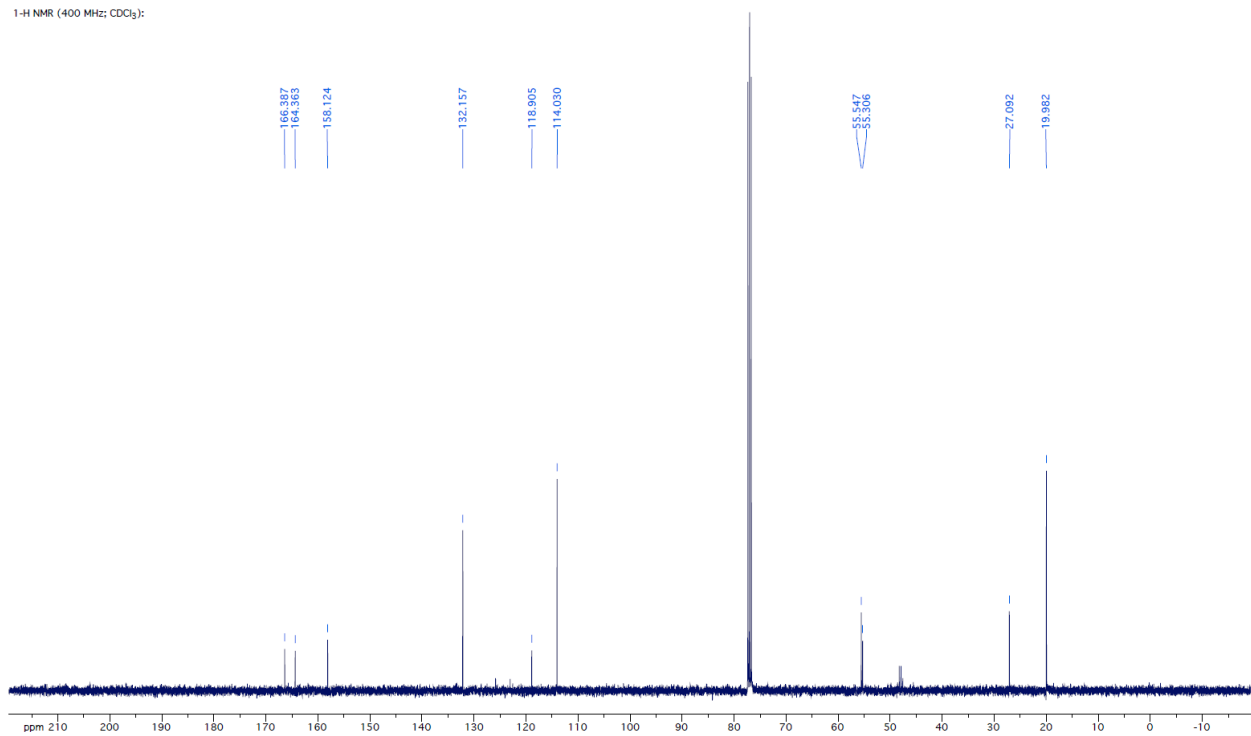

## Supporting Information

<sup>19</sup>F NMR (282 MHz; CDCl<sub>3</sub>):

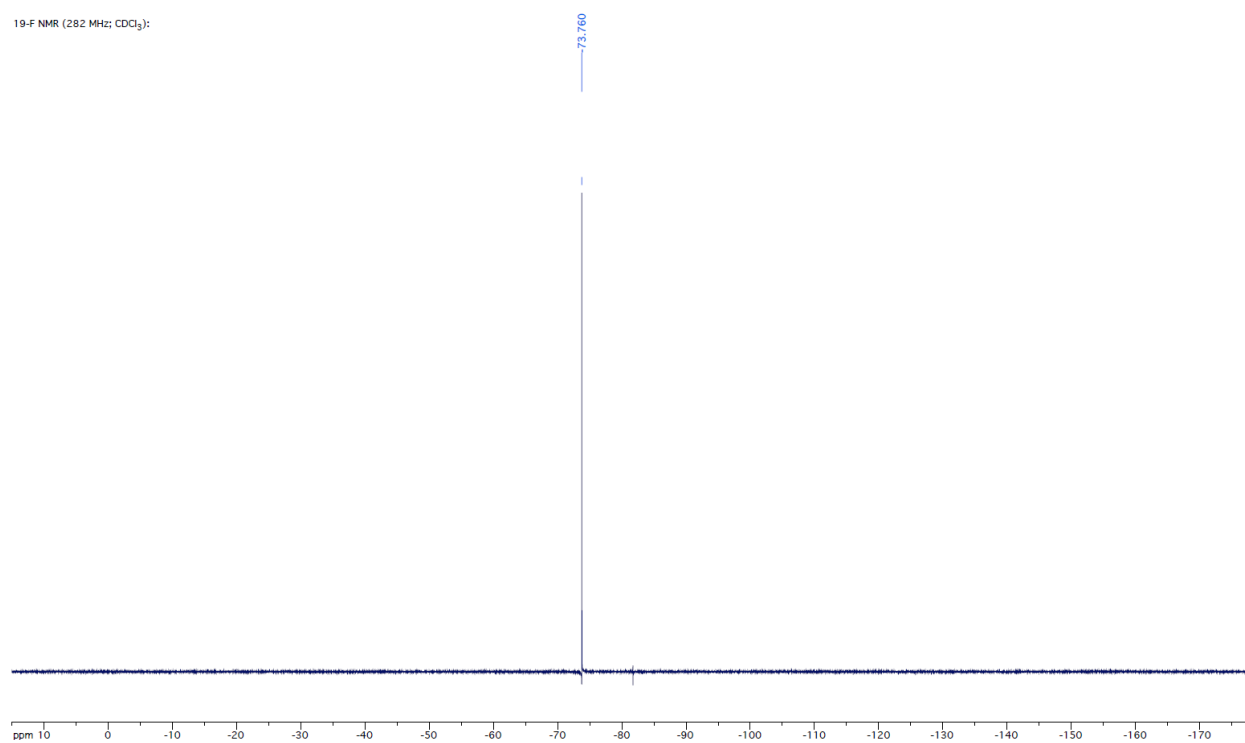

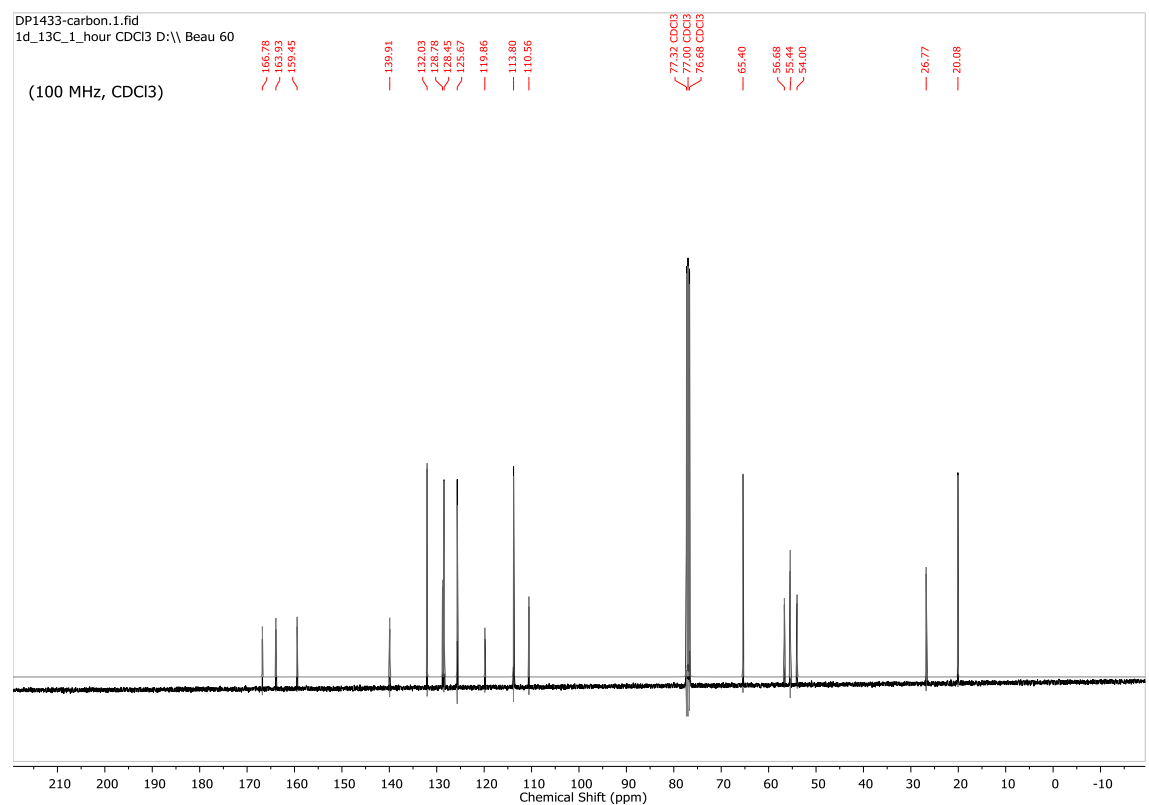

# Supporting Information

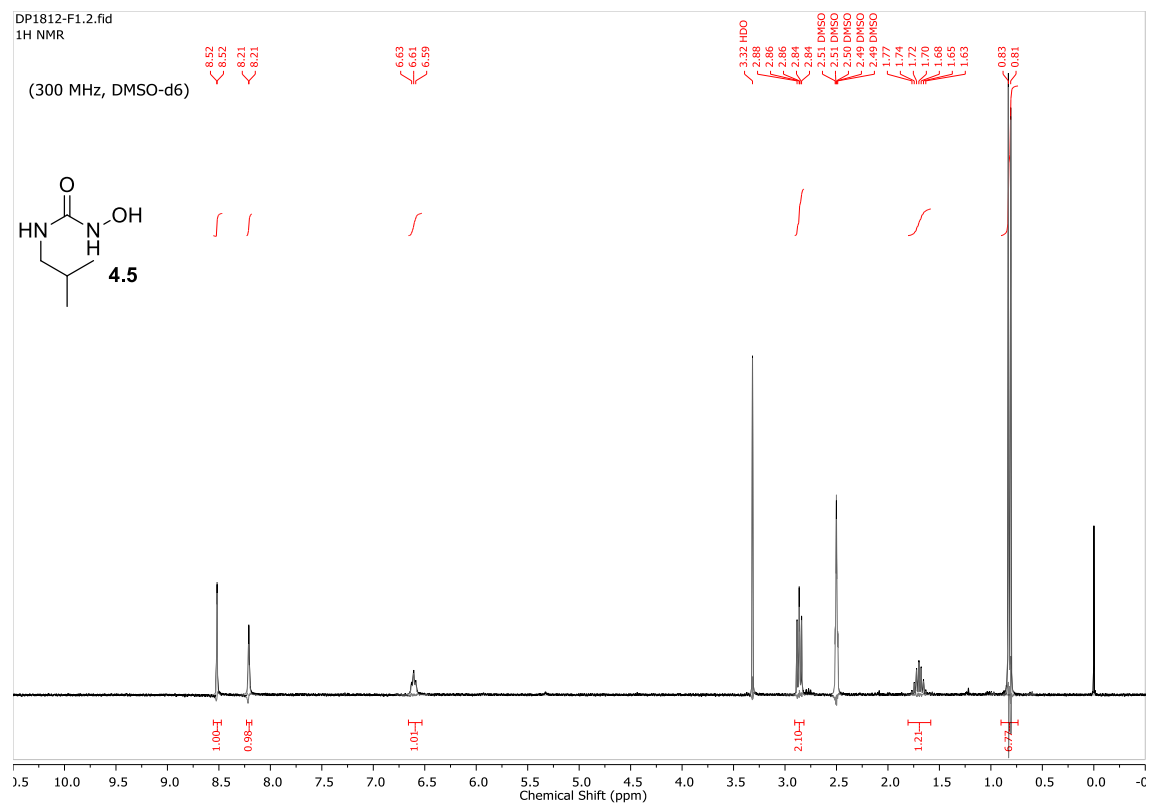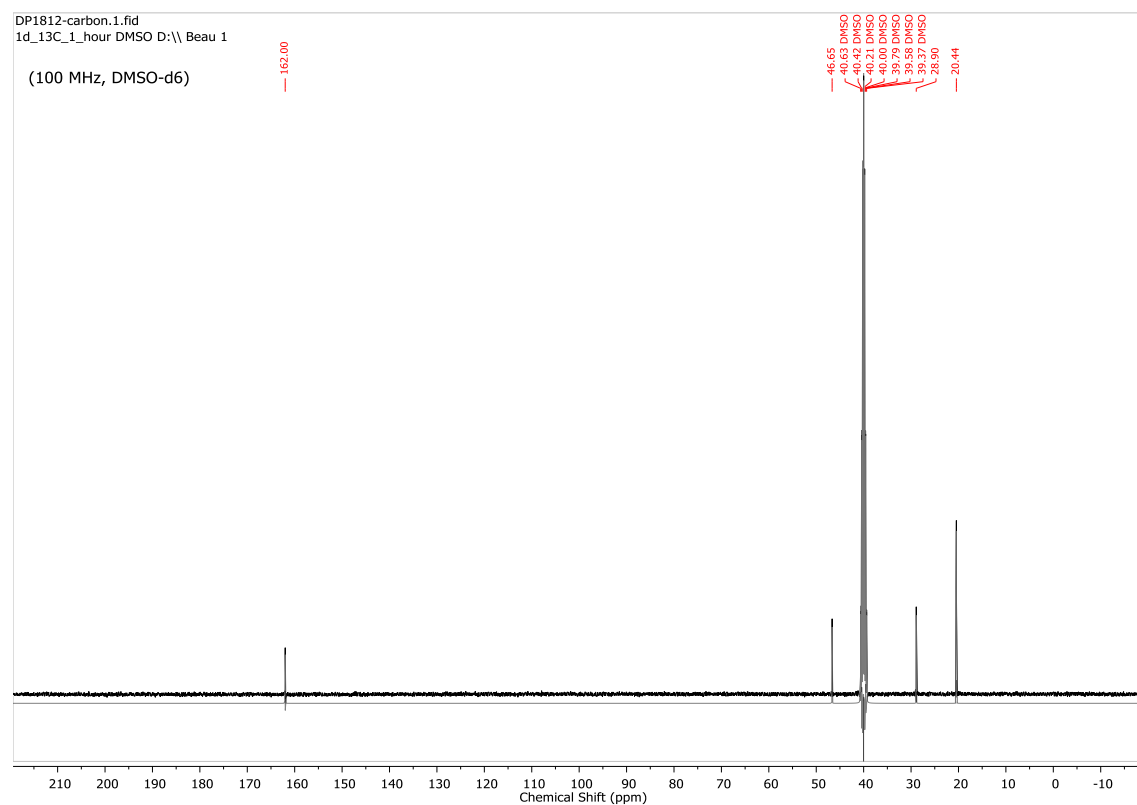



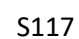

# Supporting Information

<sup>1</sup>H NMR (400 MHz; CDCl<sub>3</sub>):

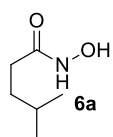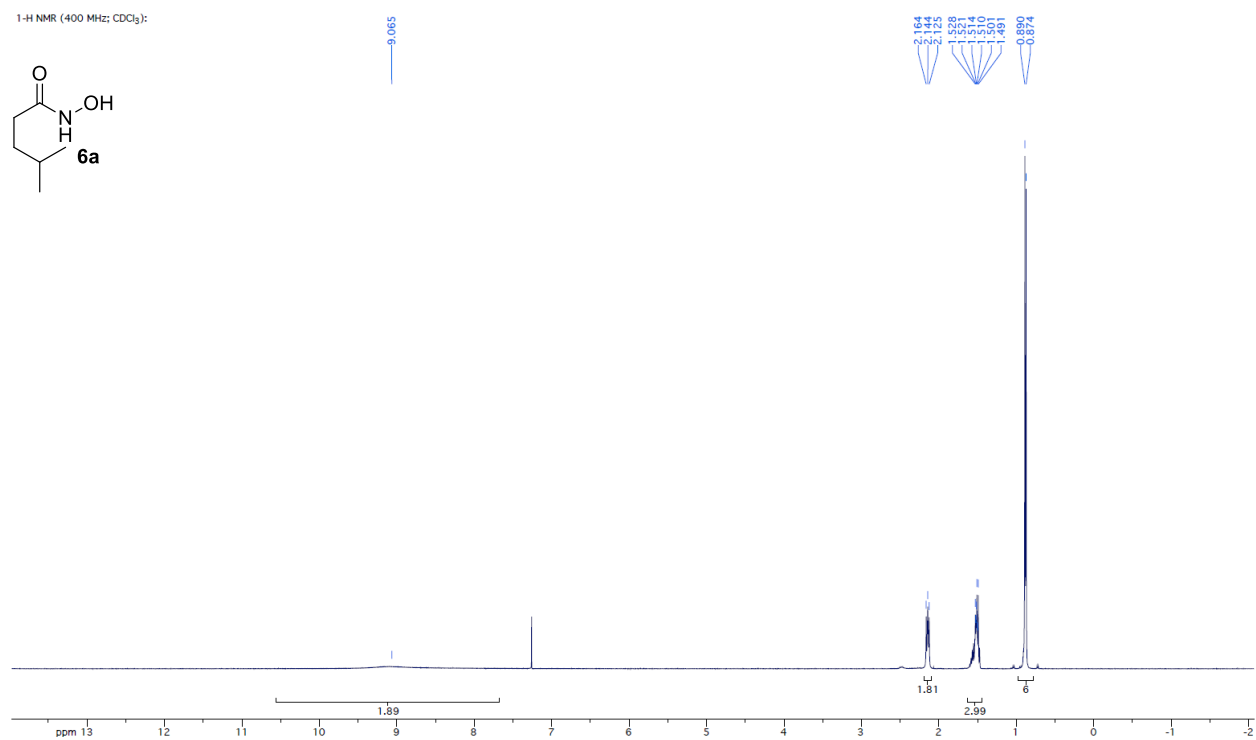

<sup>13</sup>C NMR (101 MHz; CDCl<sub>3</sub>):

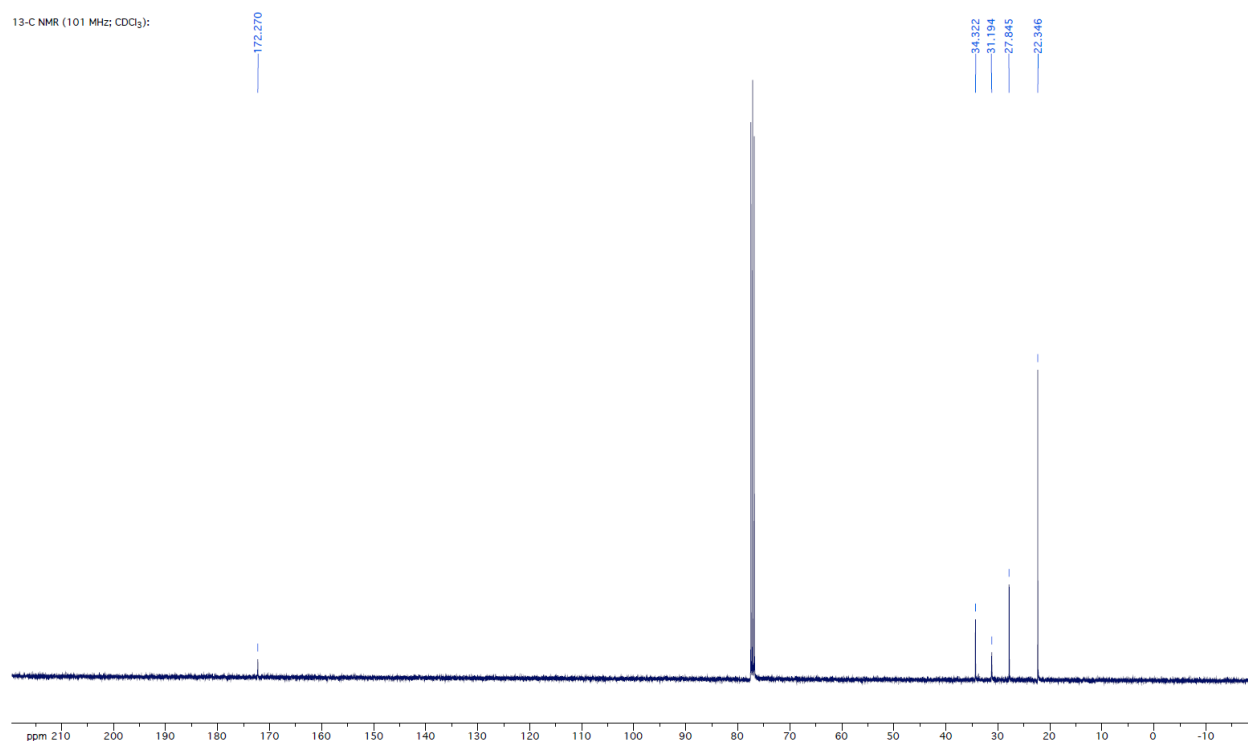

# Supporting Information

<sup>1</sup>H NMR (300 MHz; CDCl<sub>3</sub>):

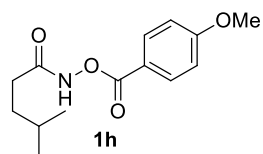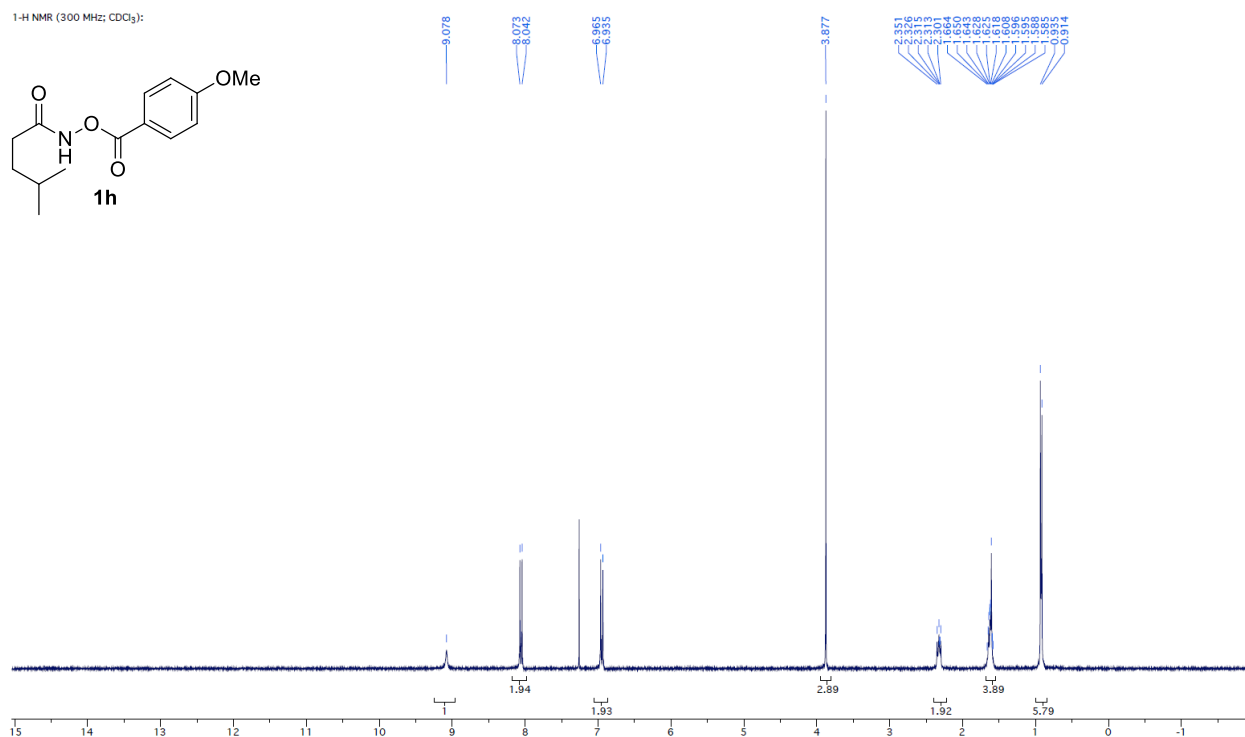

<sup>13</sup>C NMR (151 MHz; CDCl<sub>3</sub>):

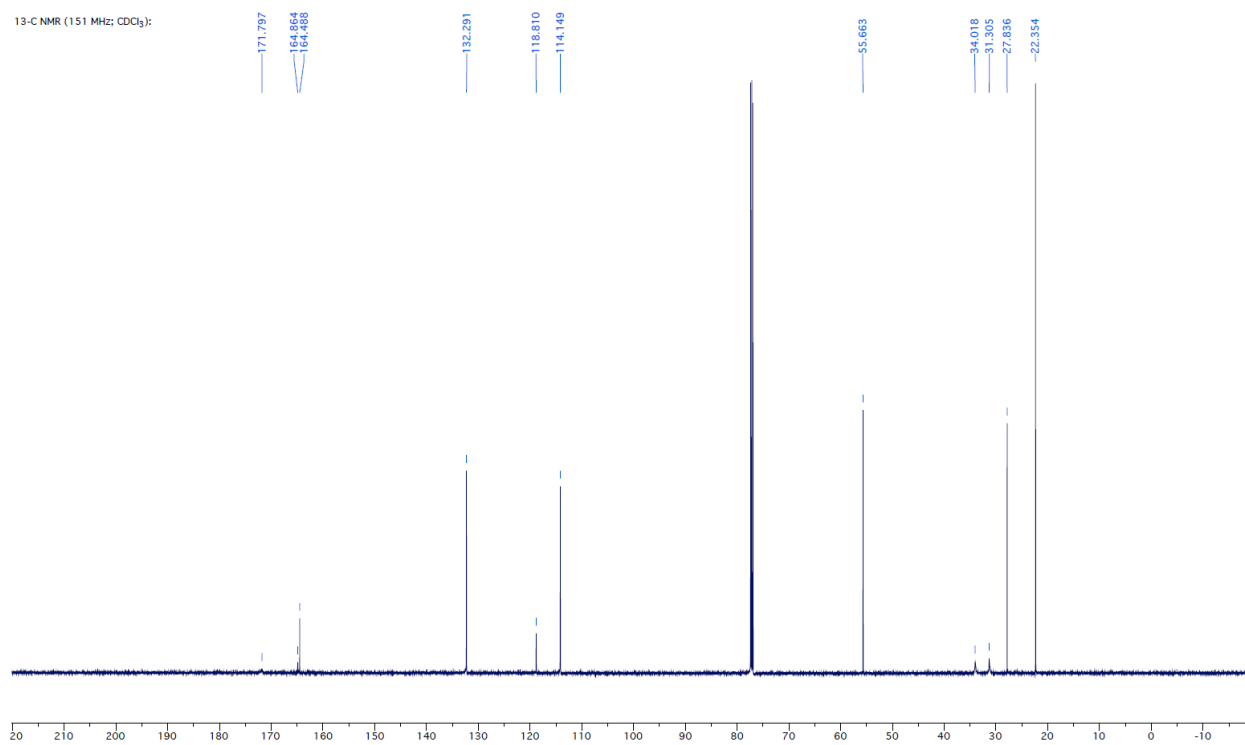

# Supporting Information

<sup>1</sup>H NMR (400 MHz; CDCl<sub>3</sub>):

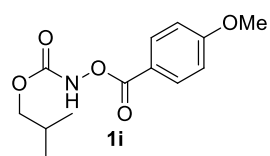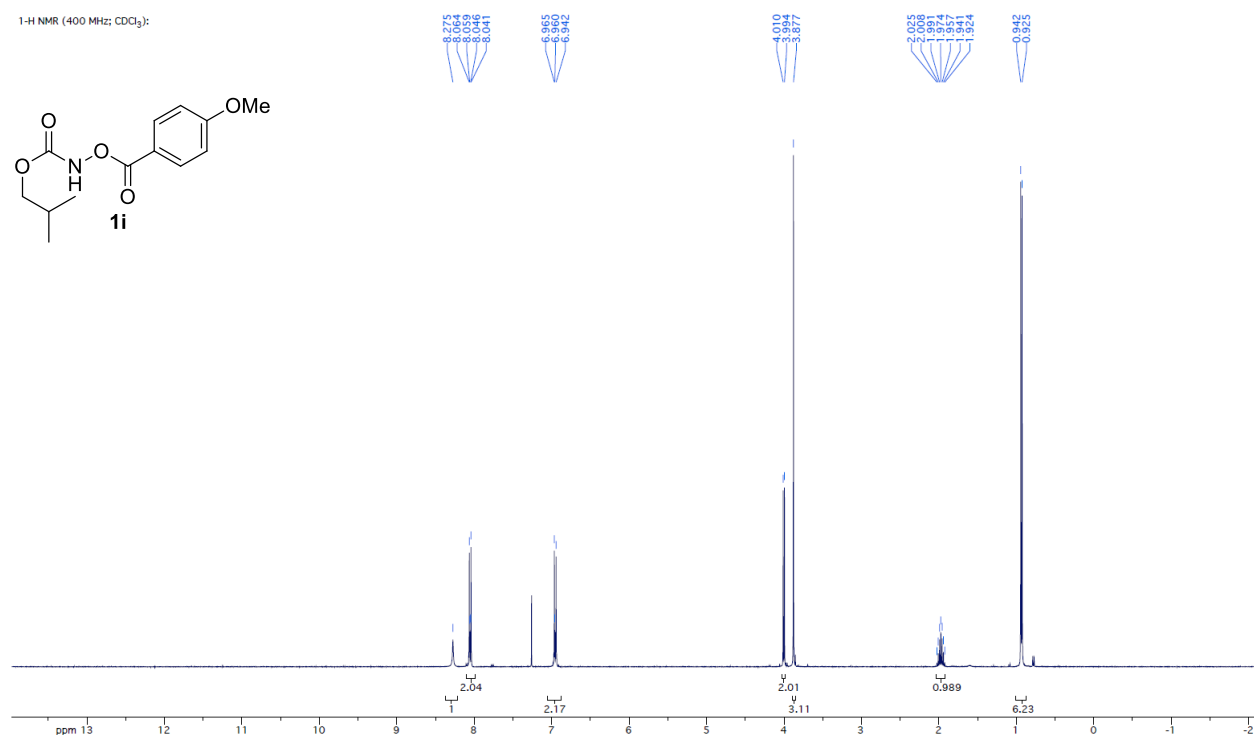

<sup>13</sup>C NMR (101 MHz; CDCl<sub>3</sub>):

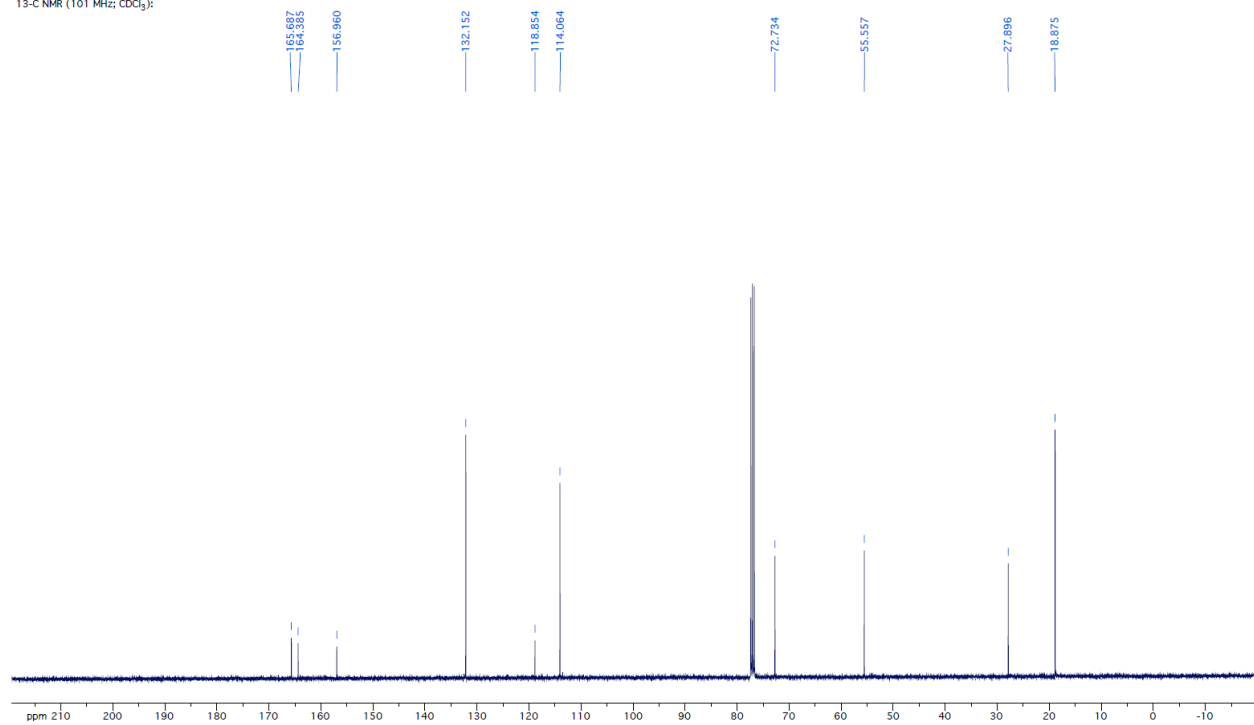

# Supporting Information

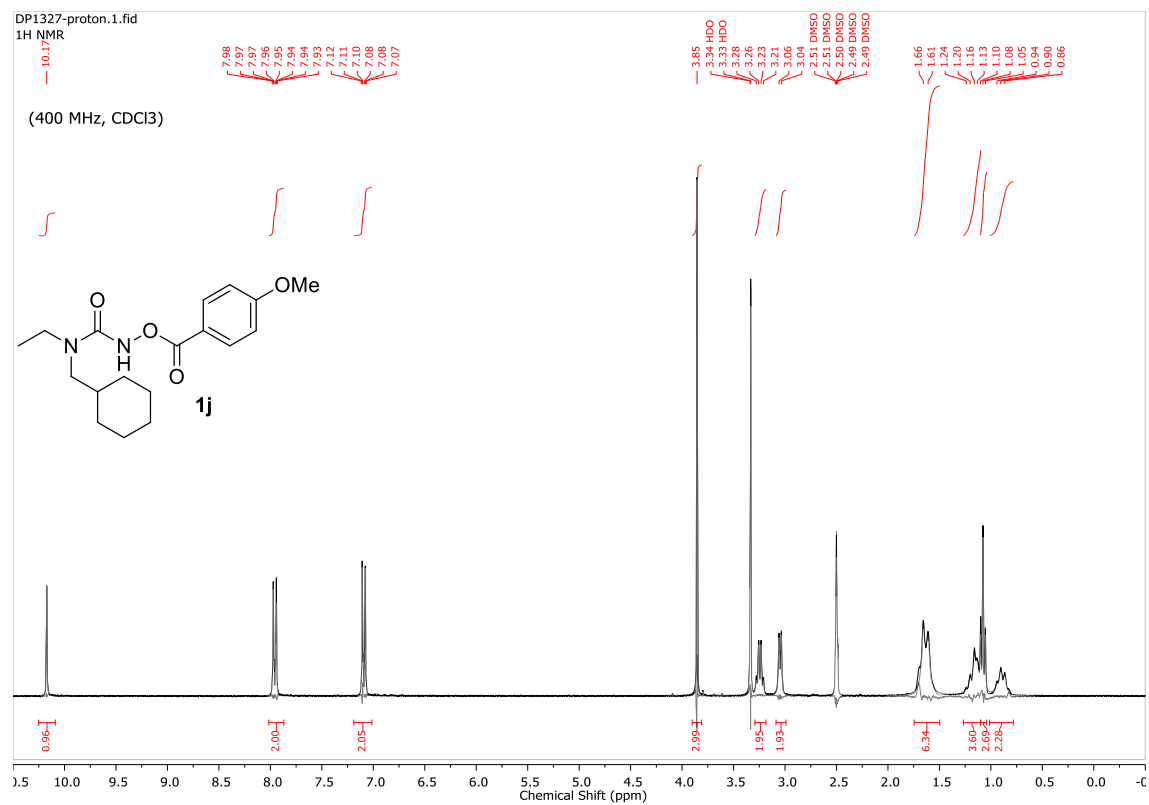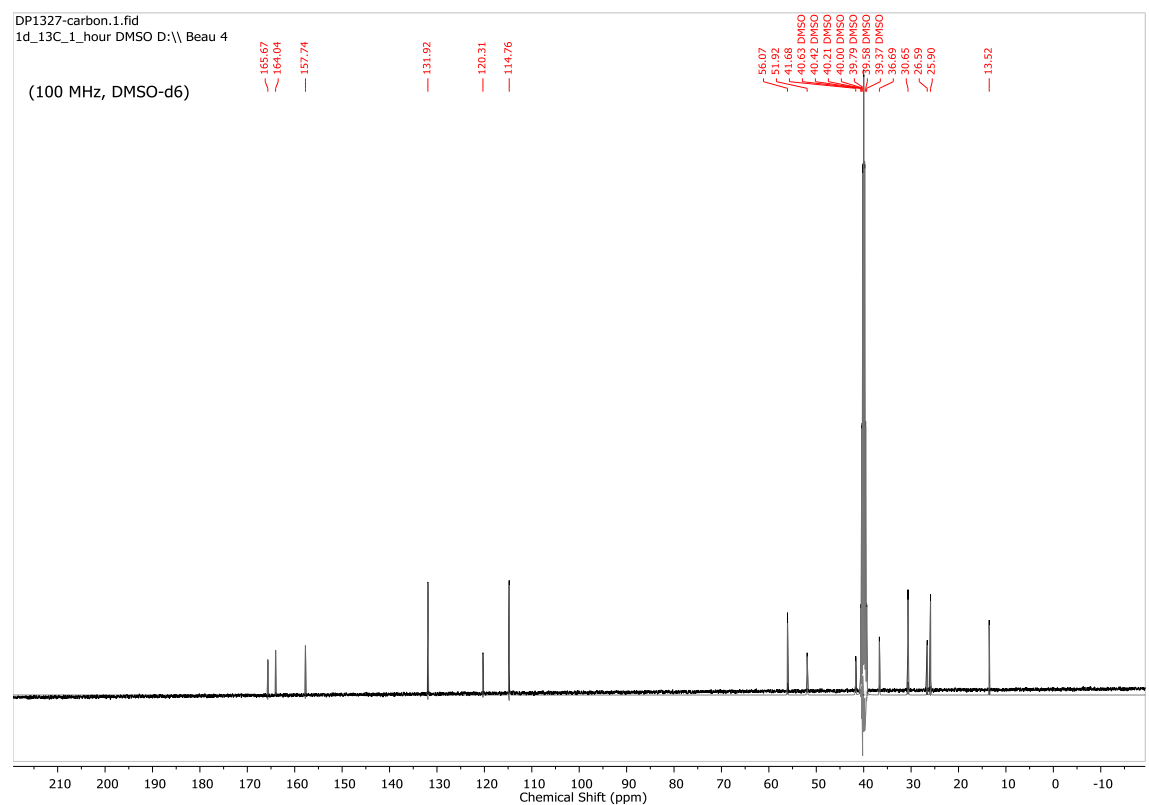

# Supporting Information

<sup>1</sup>H NMR (300 MHz; CDCl<sub>3</sub>):

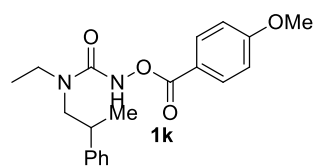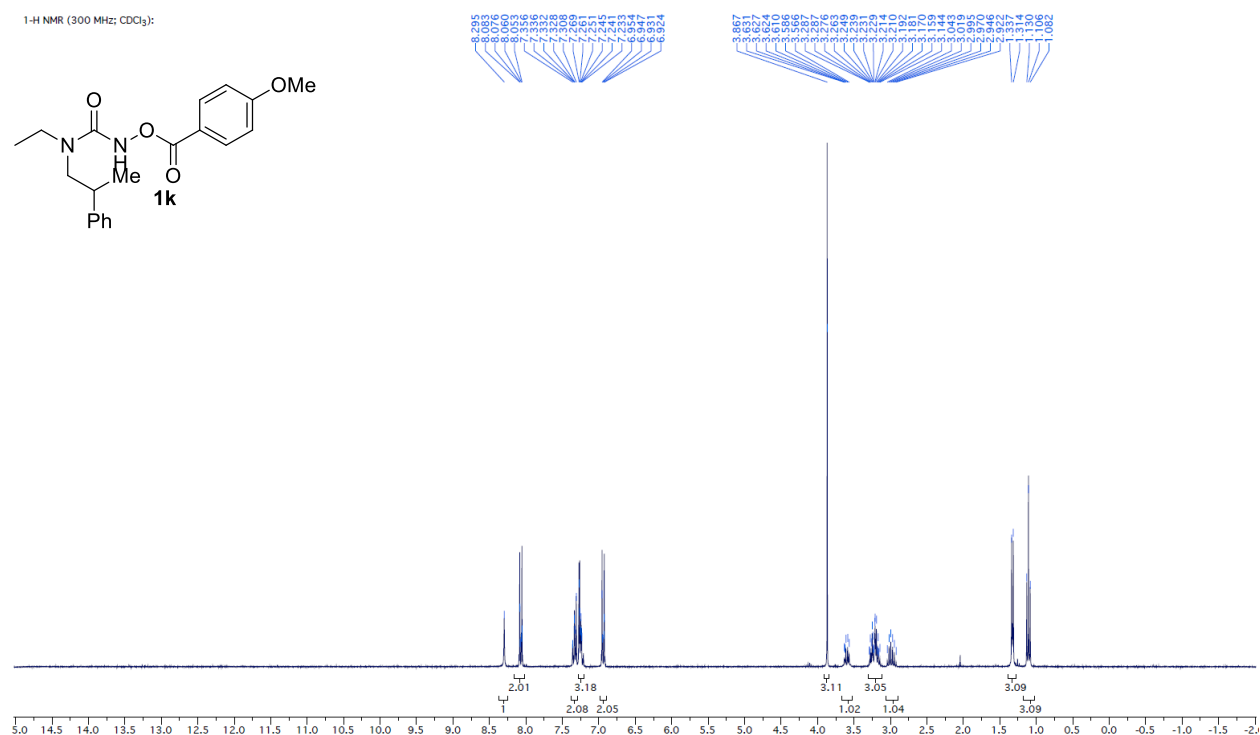

<sup>13</sup>C NMR (75 MHz; CDCl<sub>3</sub>):

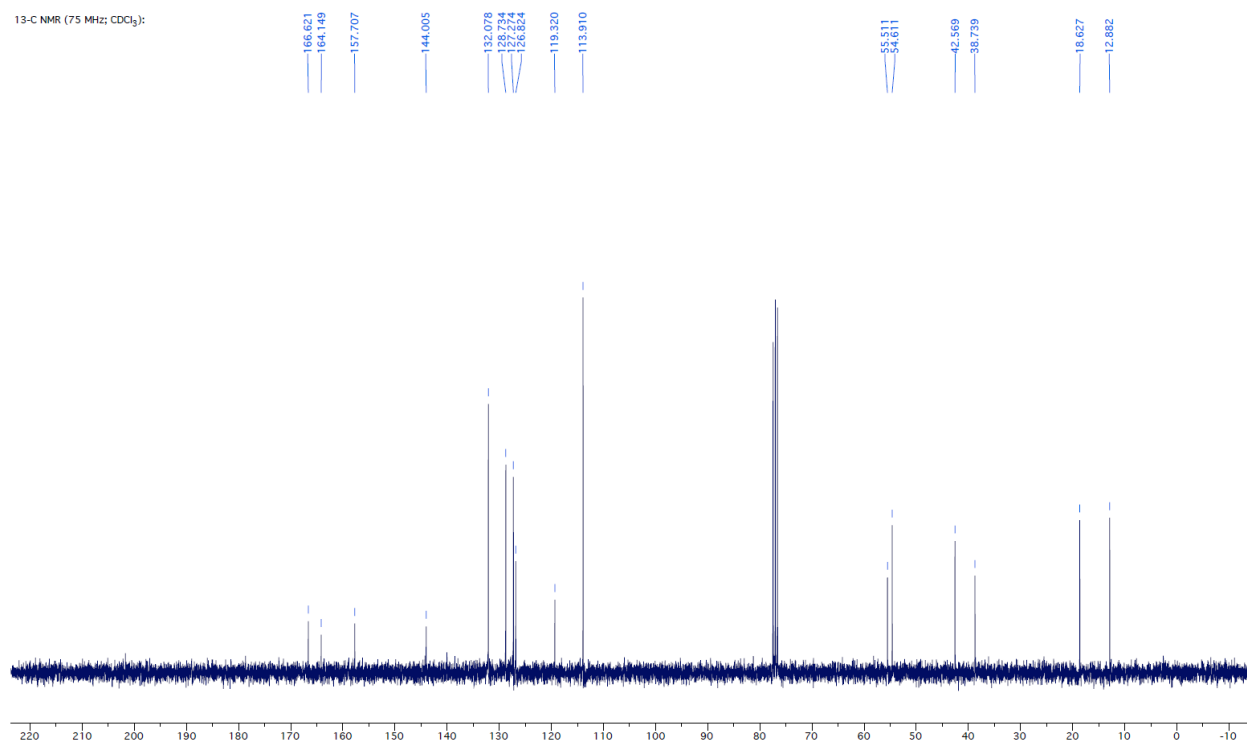

<sup>1</sup>H NMR (400 MHz; CDCl<sub>3</sub>):

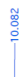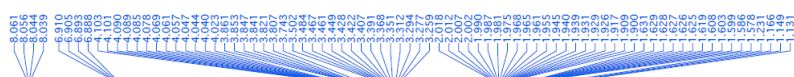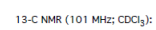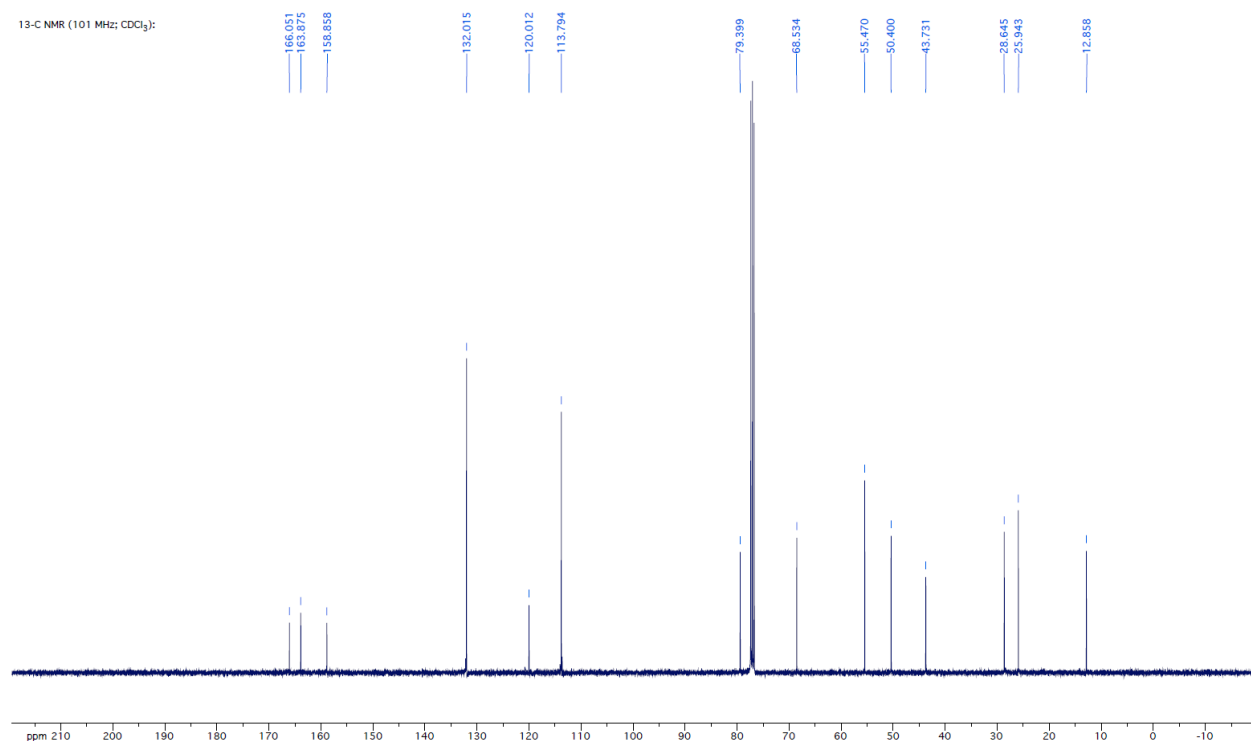

# Supporting Information

<sup>1</sup>H NMR (400 MHz; CDCl<sub>3</sub>):

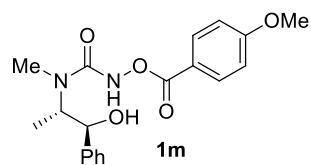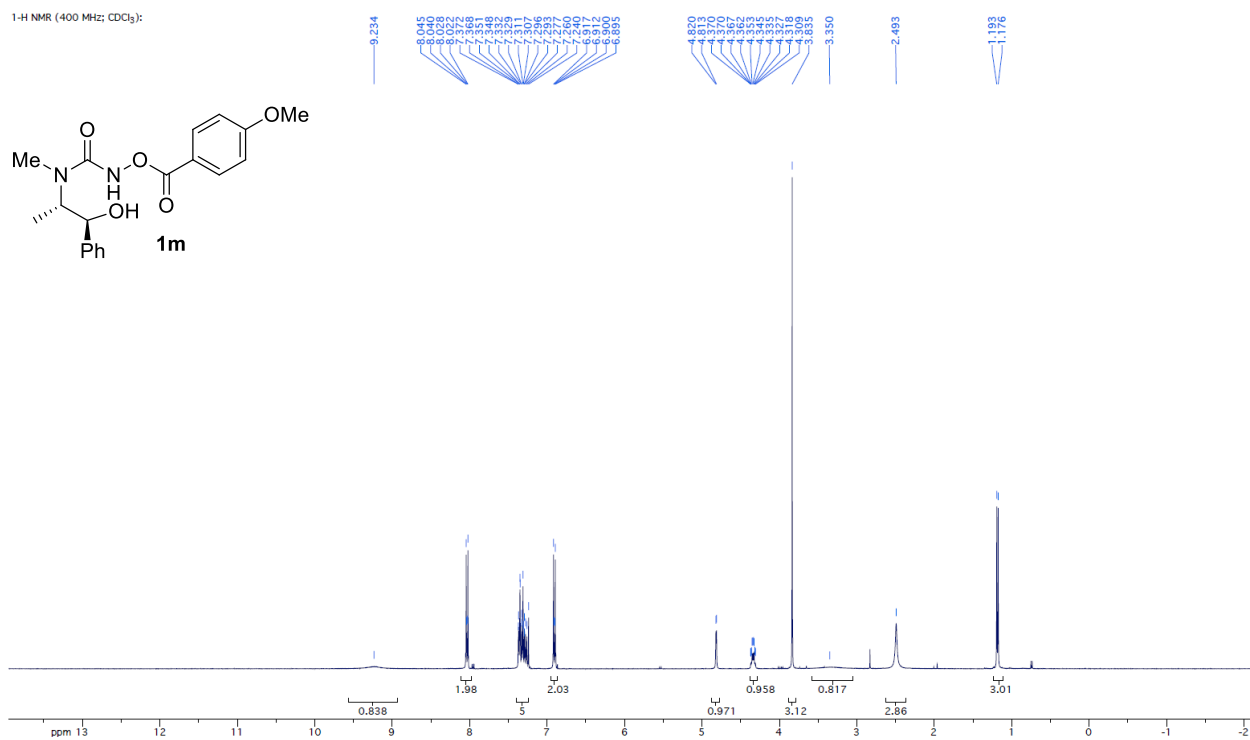



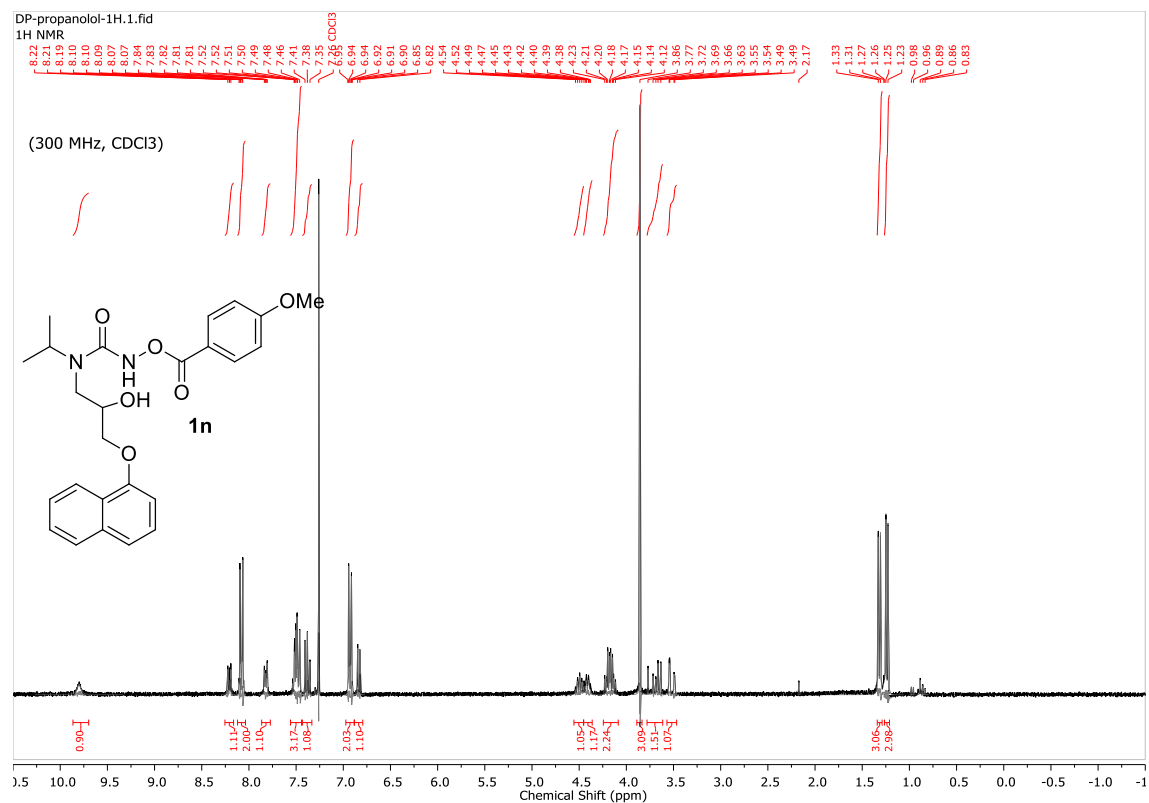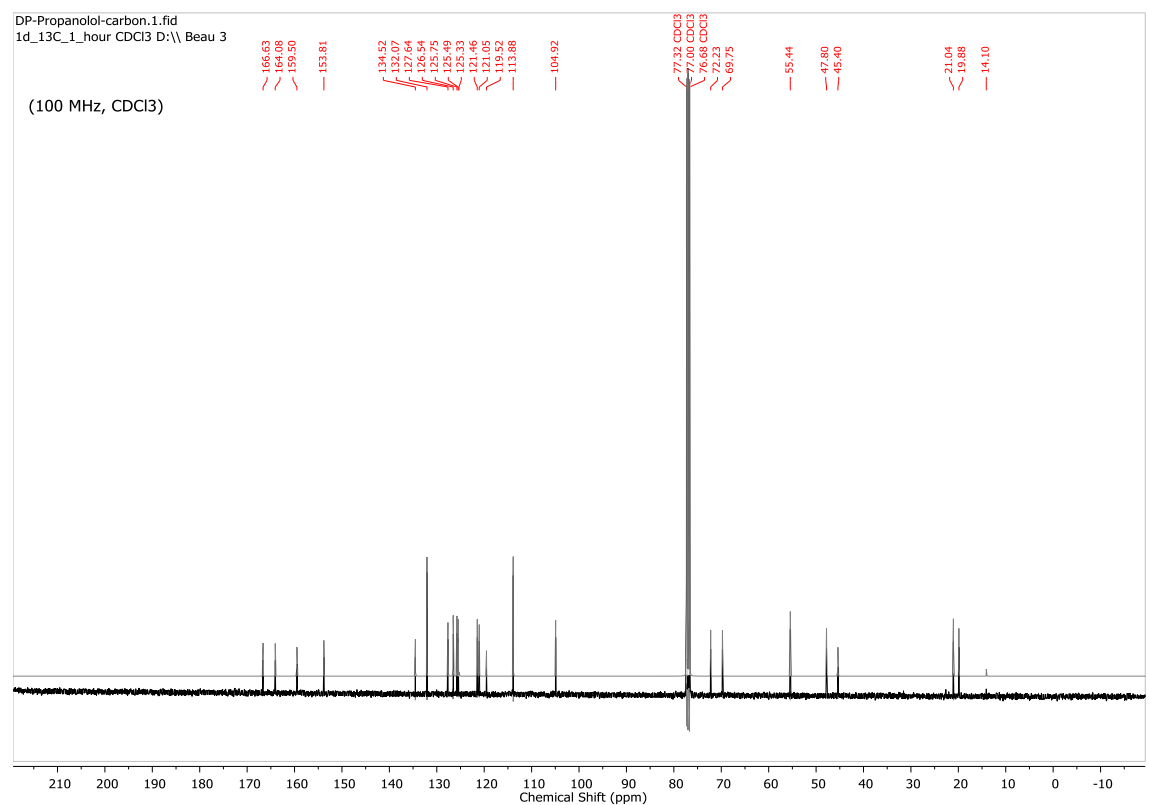

# Supporting Information

<sup>1</sup>H NMR (400 MHz; CDCl<sub>3</sub>):

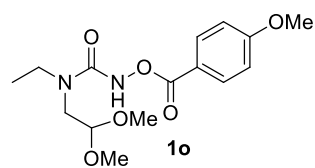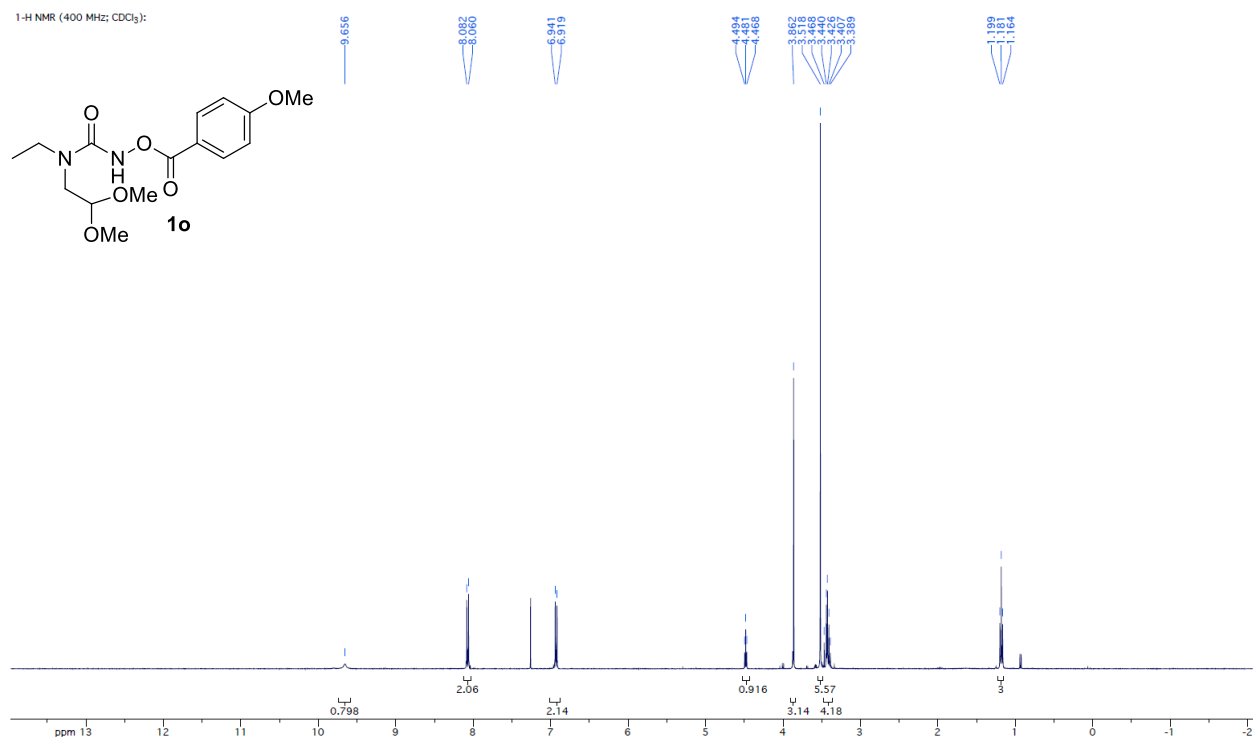

<sup>13</sup>C NMR (101 MHz; CDCl<sub>3</sub>):

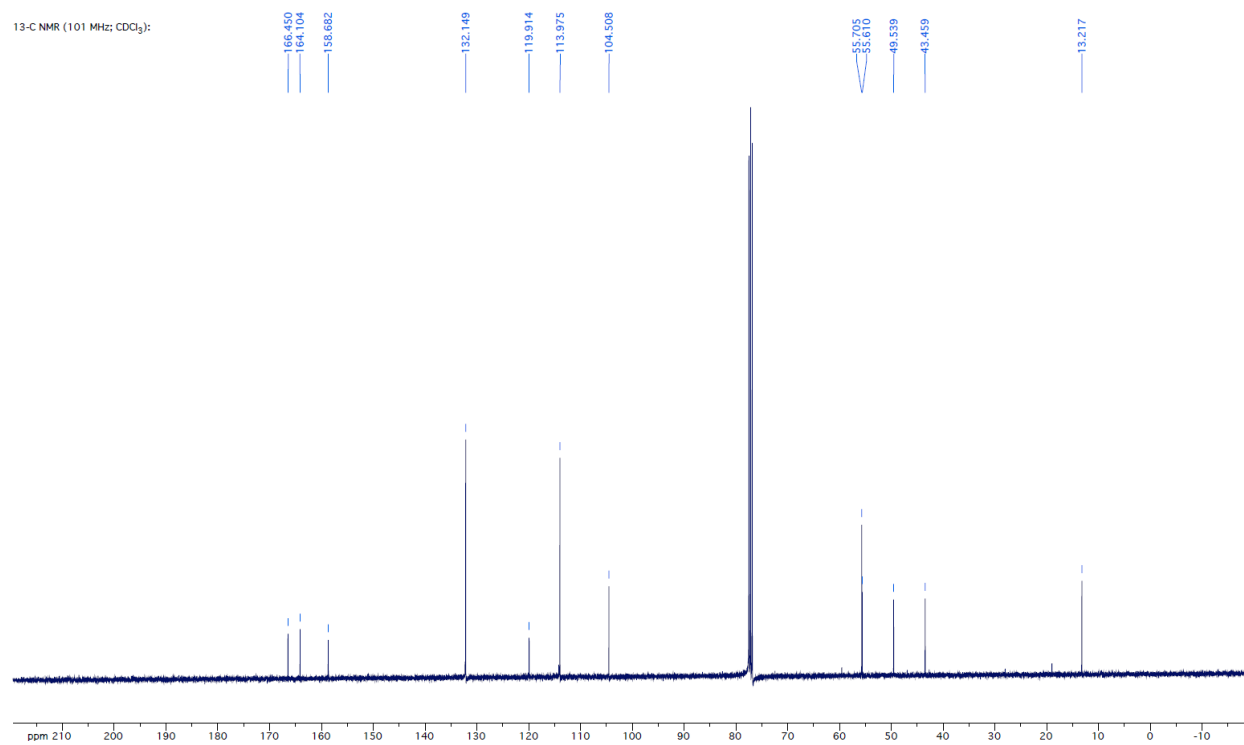

# Supporting Information

<sup>1</sup>H NMR (400 MHz; CDCl<sub>3</sub>):

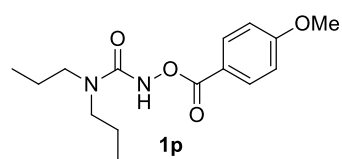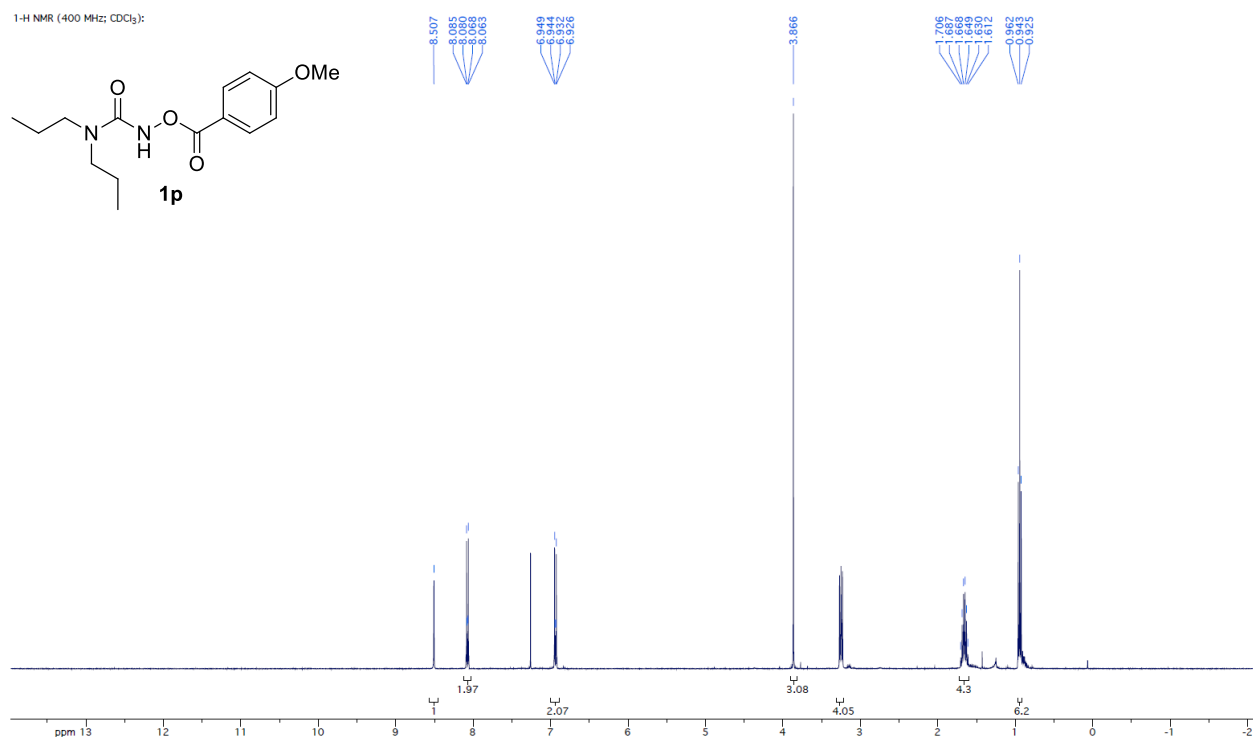

<sup>13</sup>C NMR (101 MHz; CDCl<sub>3</sub>):

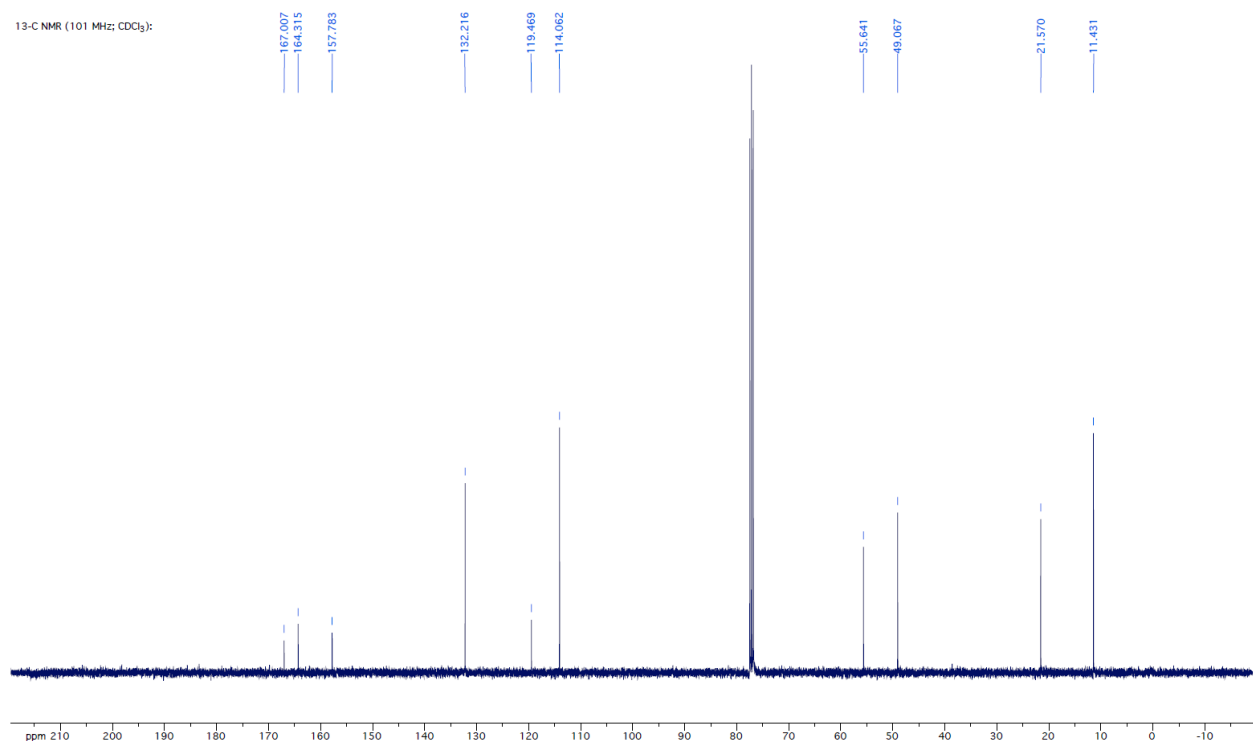

# Supporting Information

<sup>1</sup>H NMR (400 MHz; CDCl<sub>3</sub>):

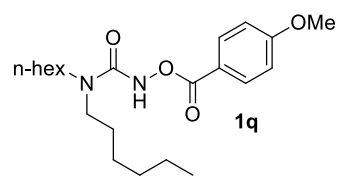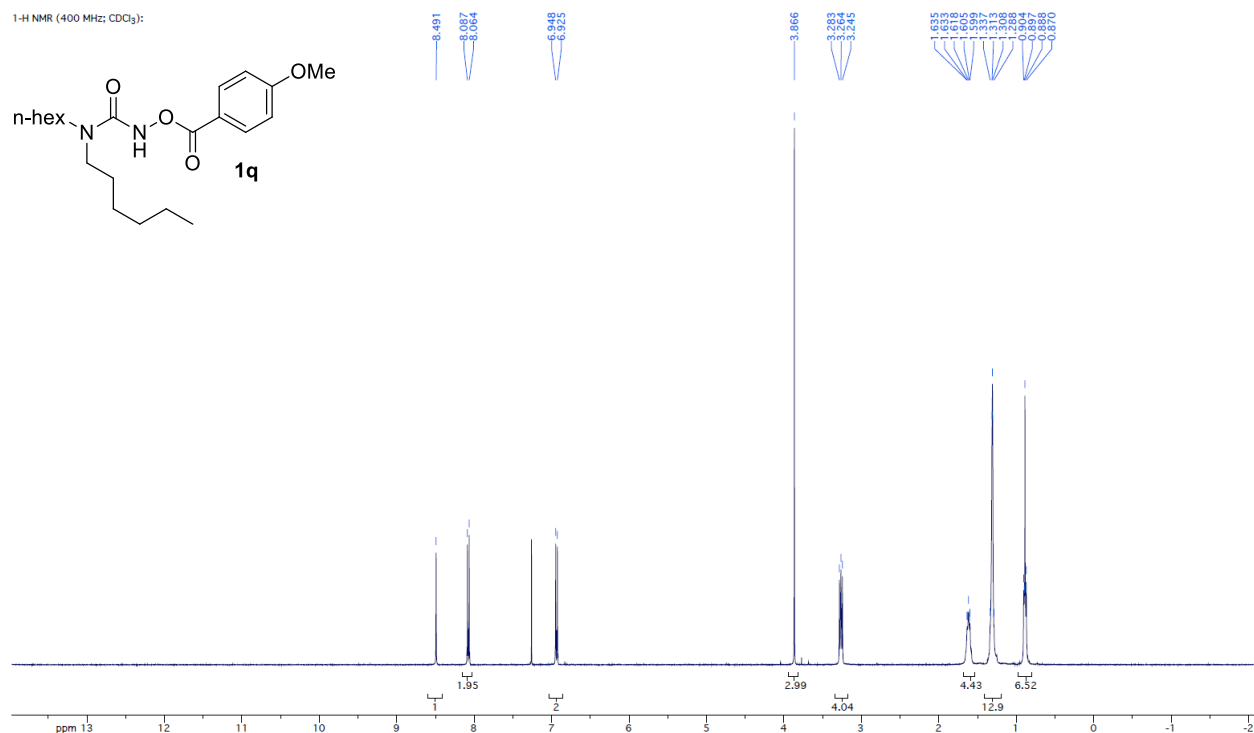

<sup>13</sup>C NMR (101 MHz; CDCl<sub>3</sub>):

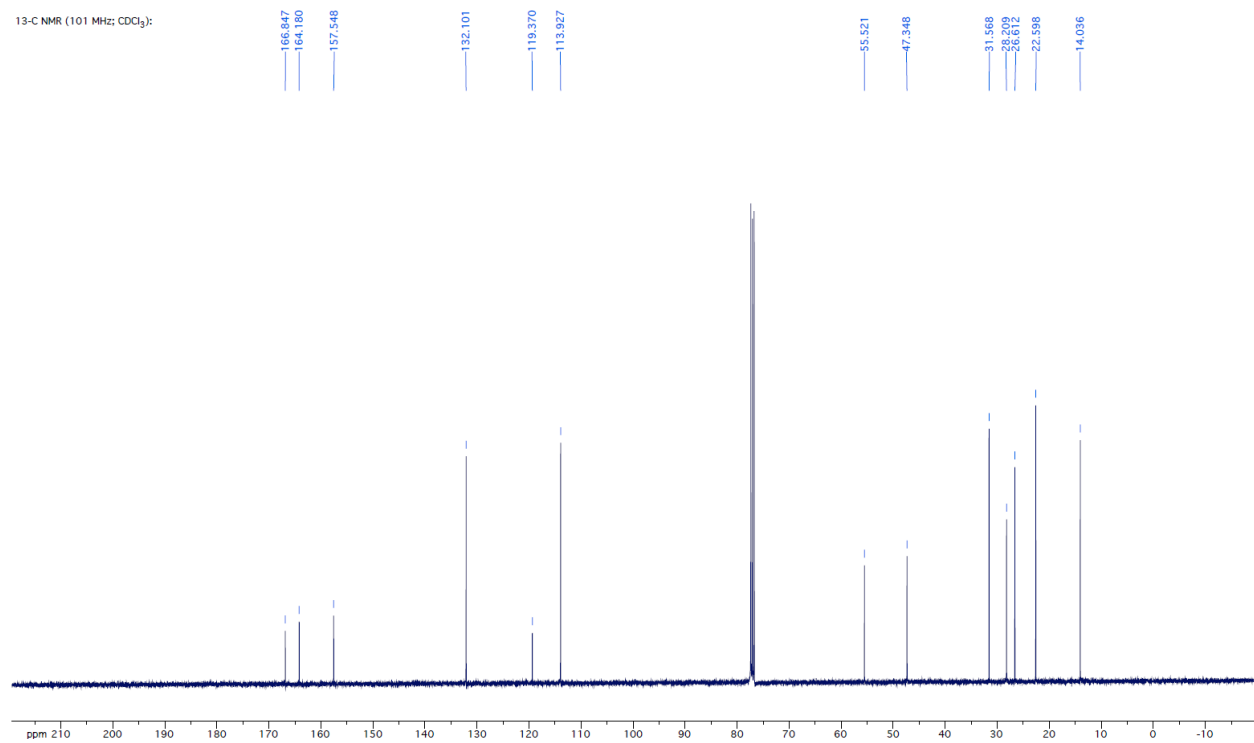

[illegible]

# Supporting Information

<sup>1</sup>H NMR (400 MHz; CDCl<sub>3</sub>):

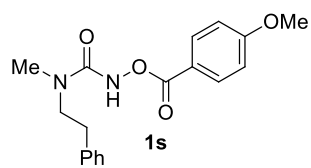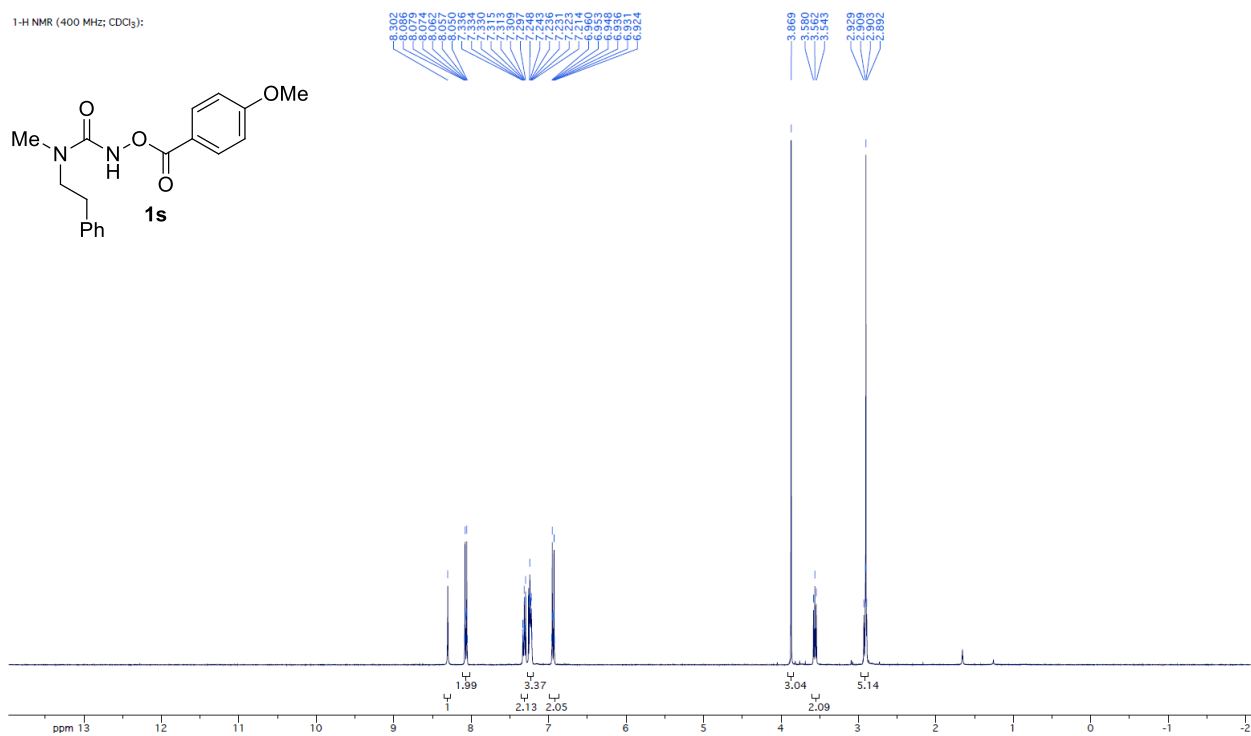

# Supporting Information

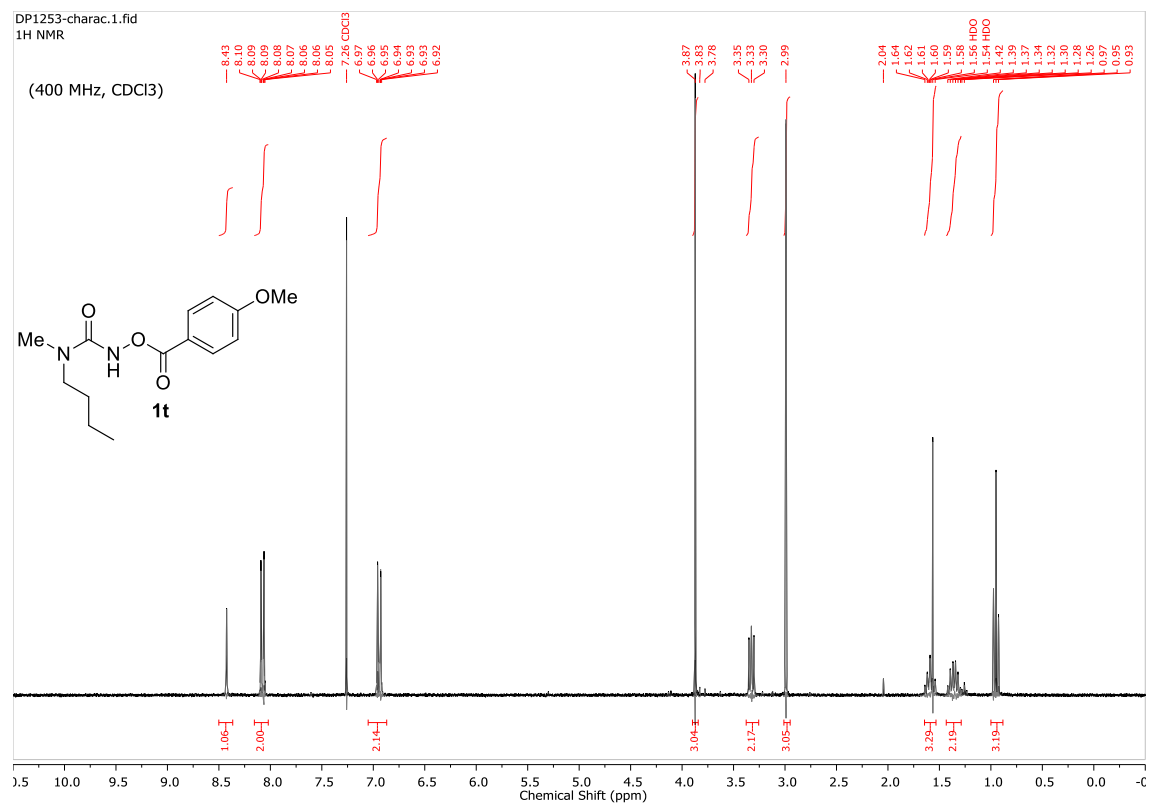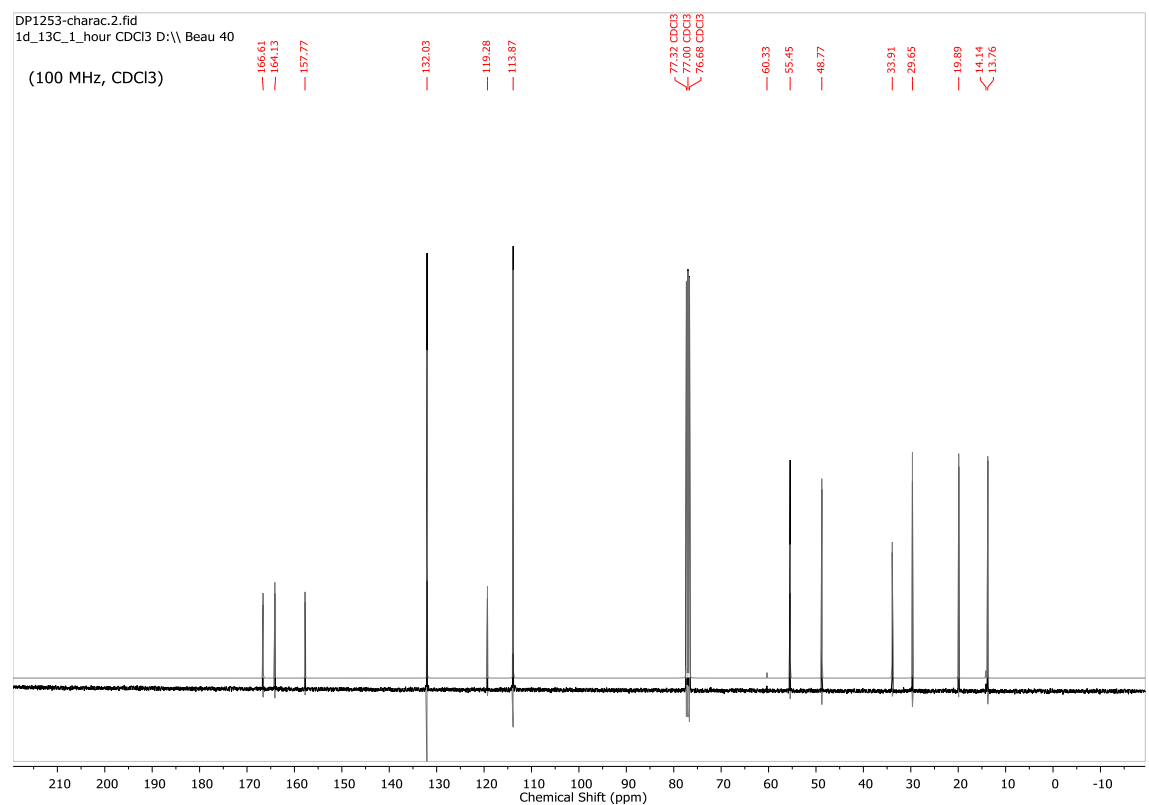

# Supporting Information

<sup>1</sup>H NMR (300 MHz; CDCl<sub>3</sub>):

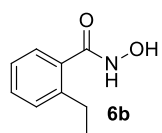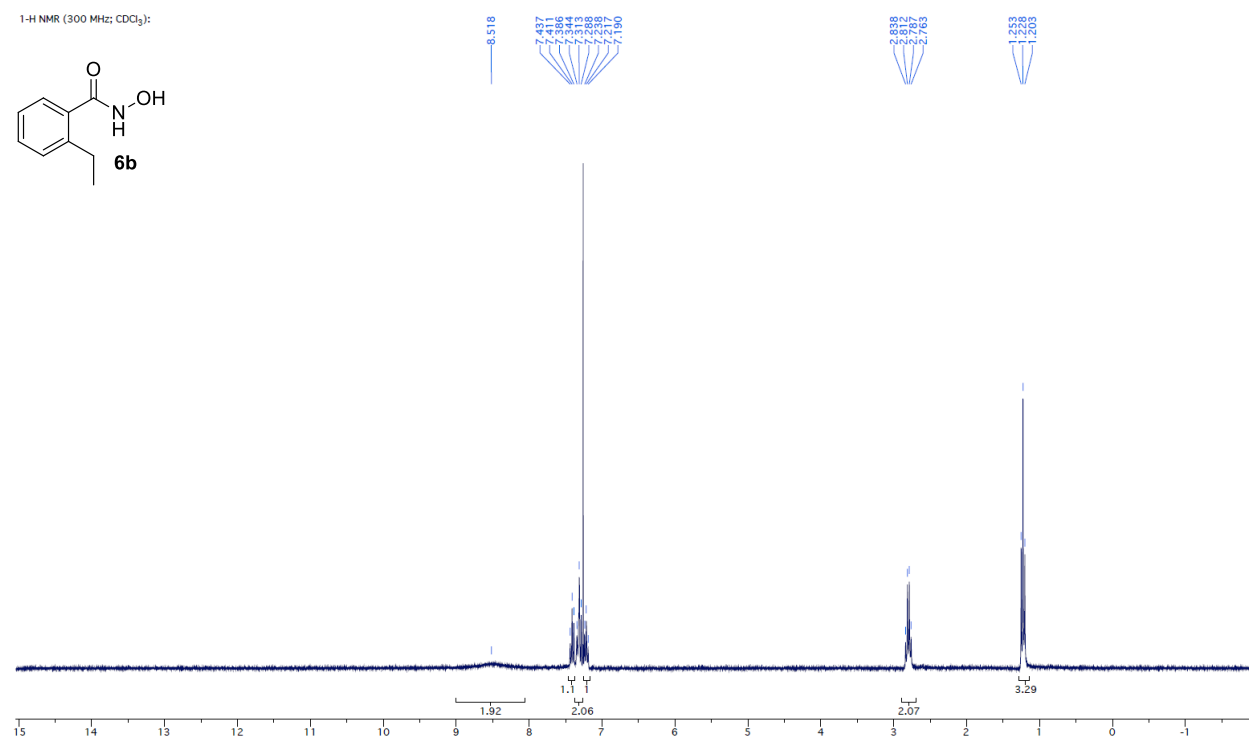

<sup>13</sup>C NMR (101 MHz; CDCl<sub>3</sub>):

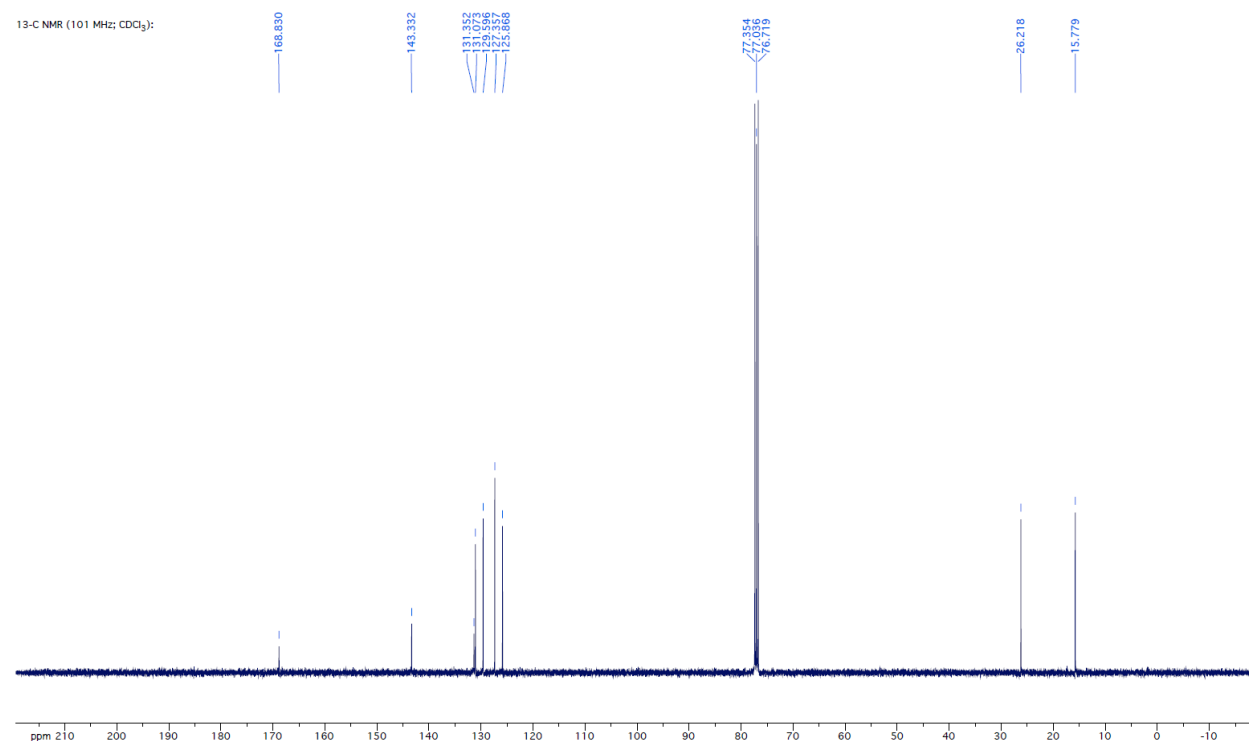



# Supporting Information

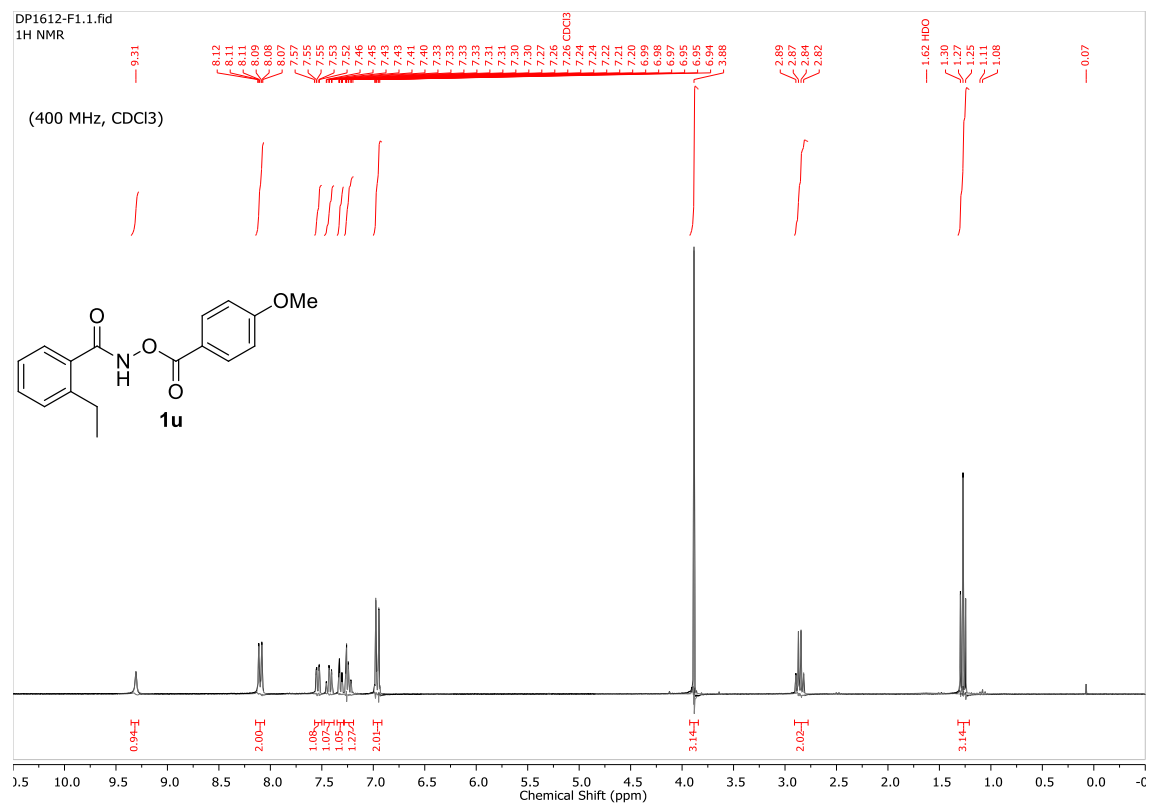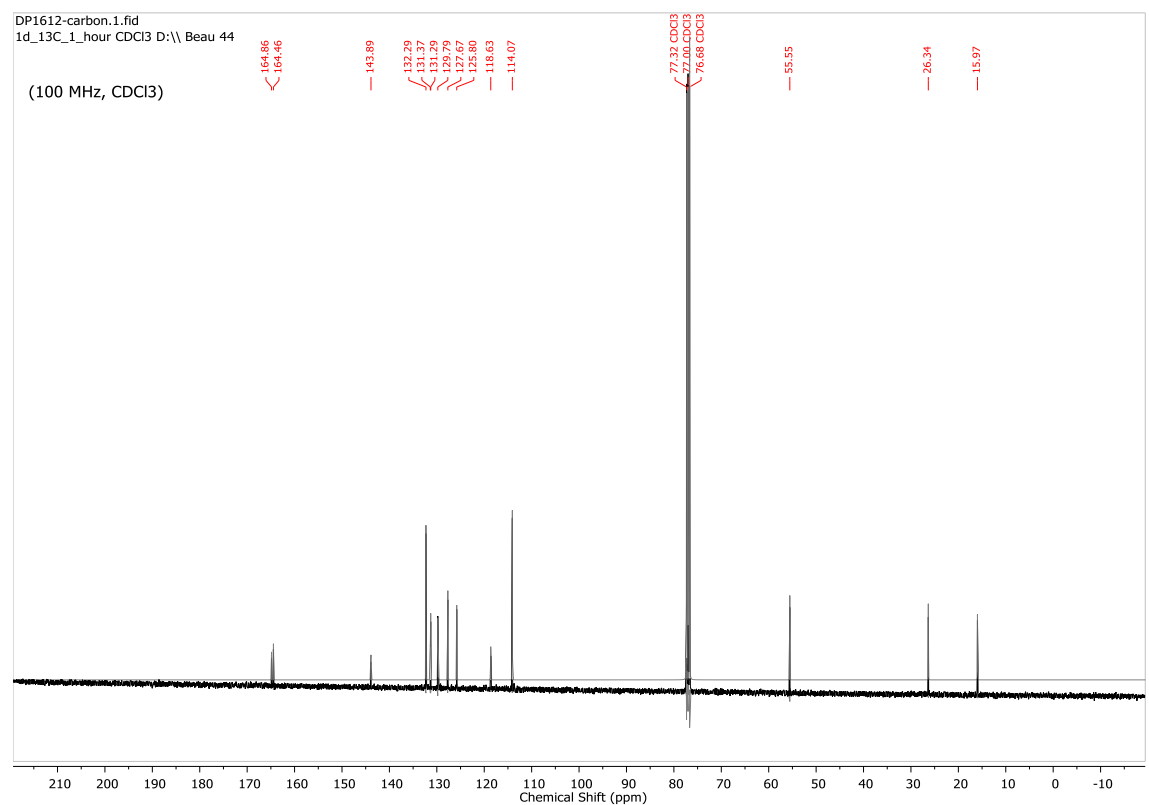

<sup>1</sup>H NMR (400 MHz; CDCl<sub>3</sub>):

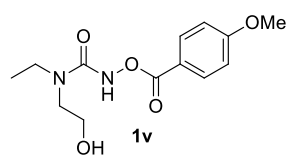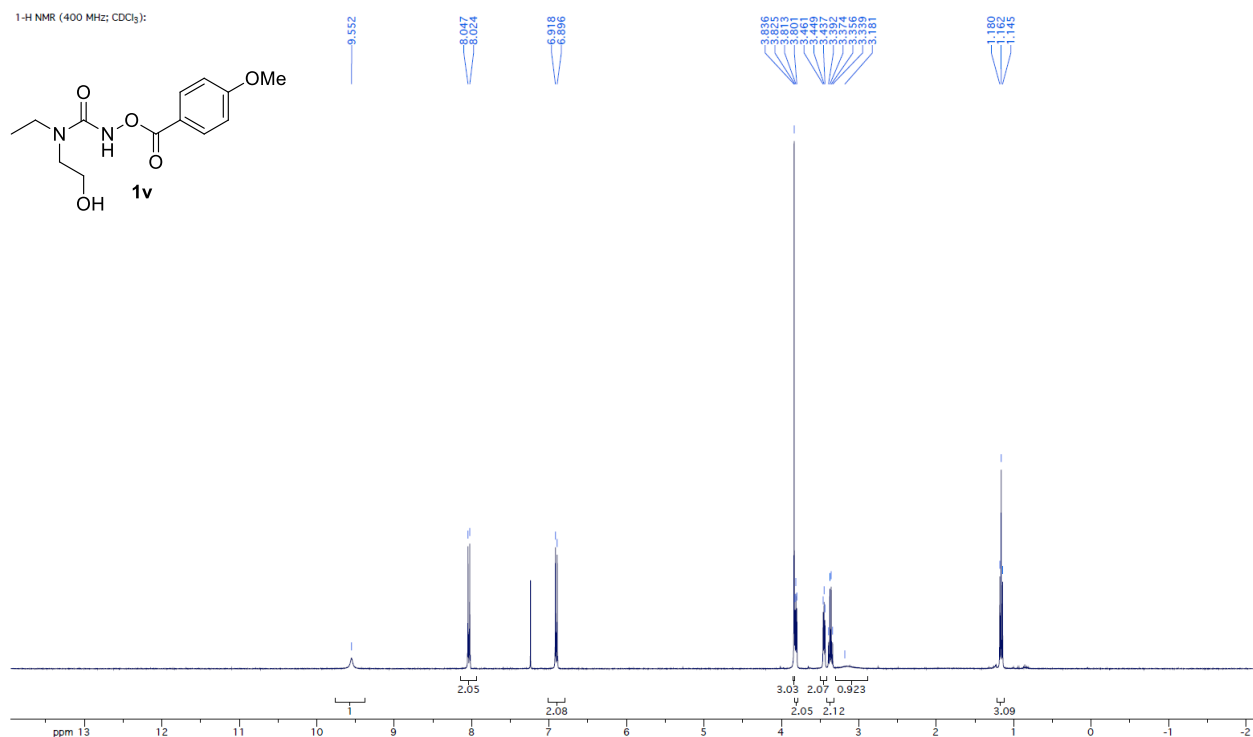

<sup>13</sup>C NMR (101 MHz; CDCl<sub>3</sub>):

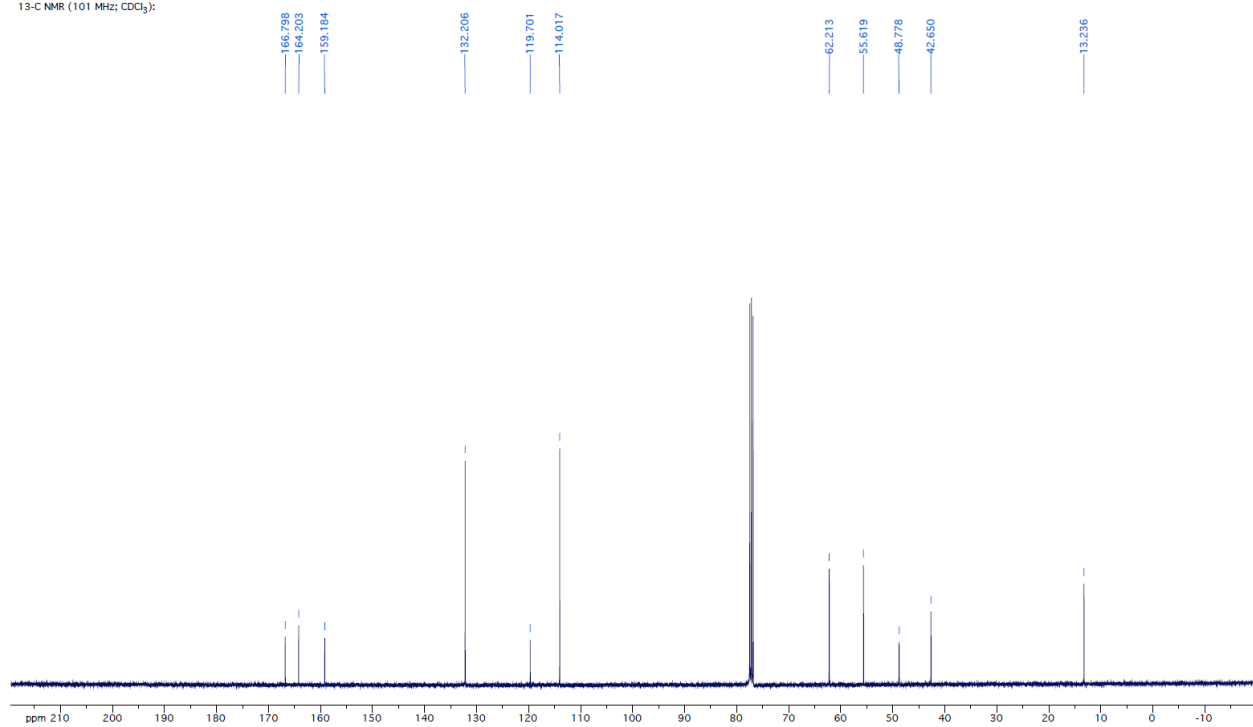

<sup>1</sup>H NMR (400 MHz; CDCl<sub>3</sub>):

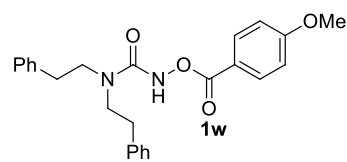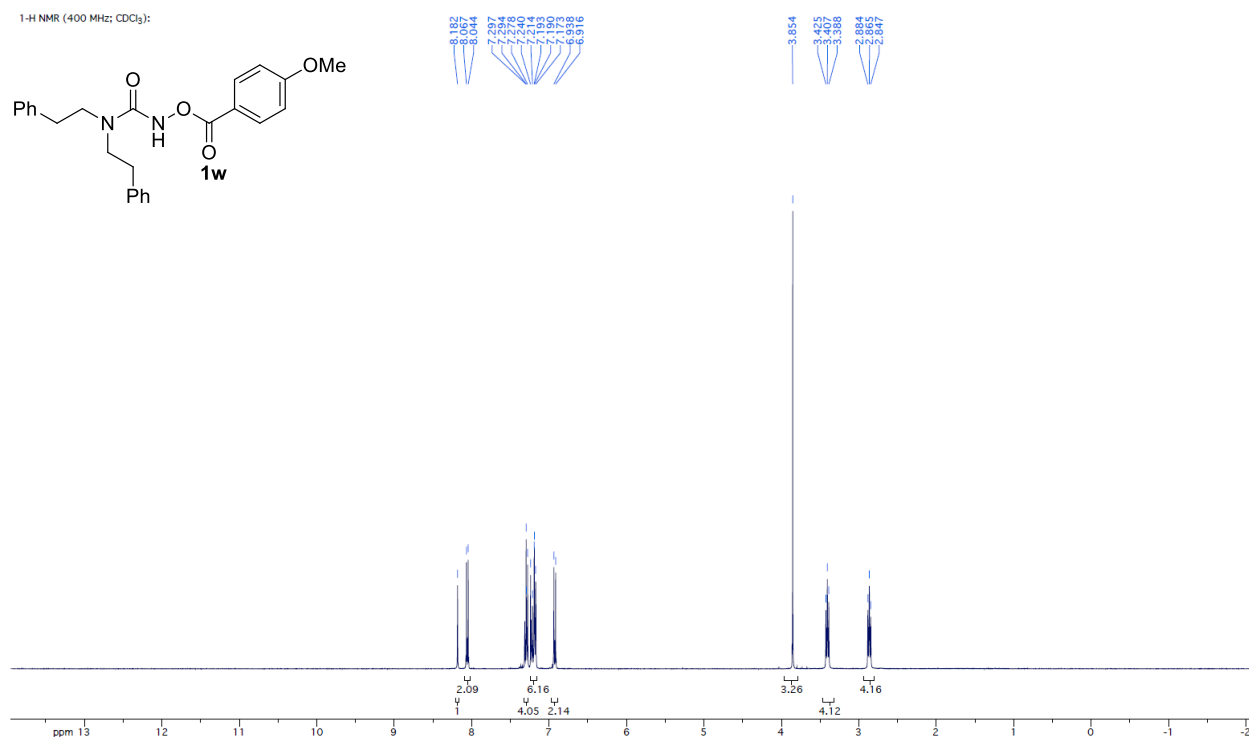

<sup>13</sup>C NMR (101 MHz; CDCl<sub>3</sub>):

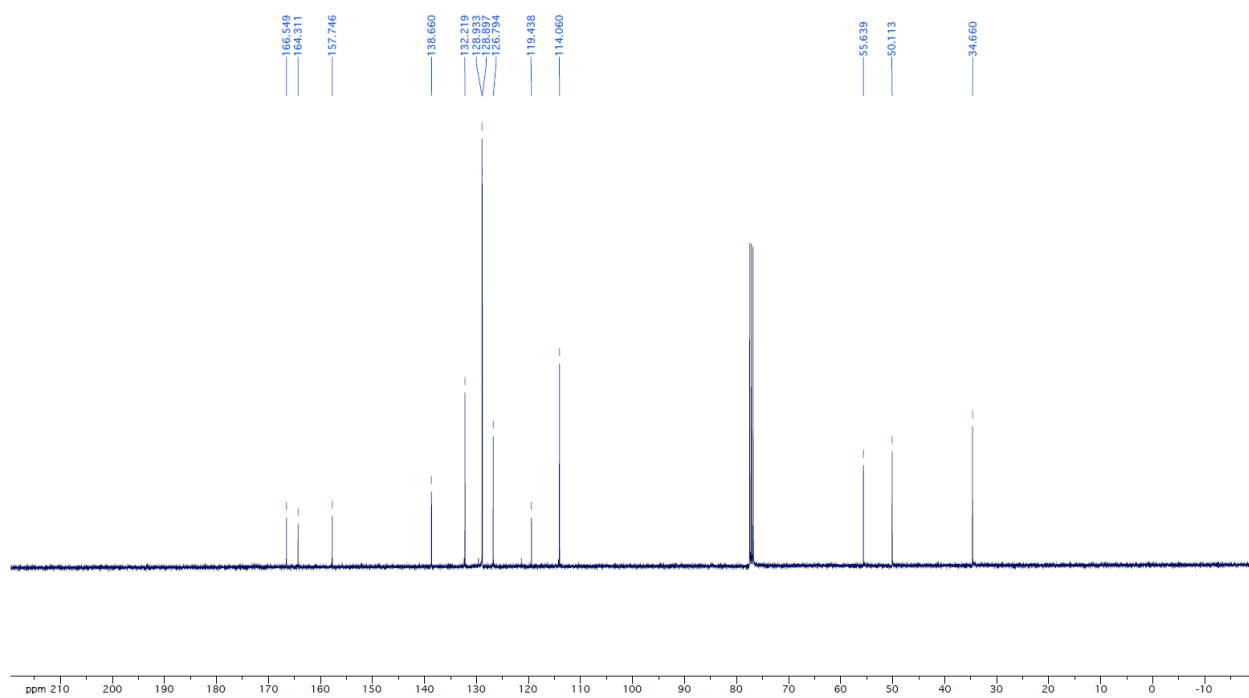

# Supporting Information

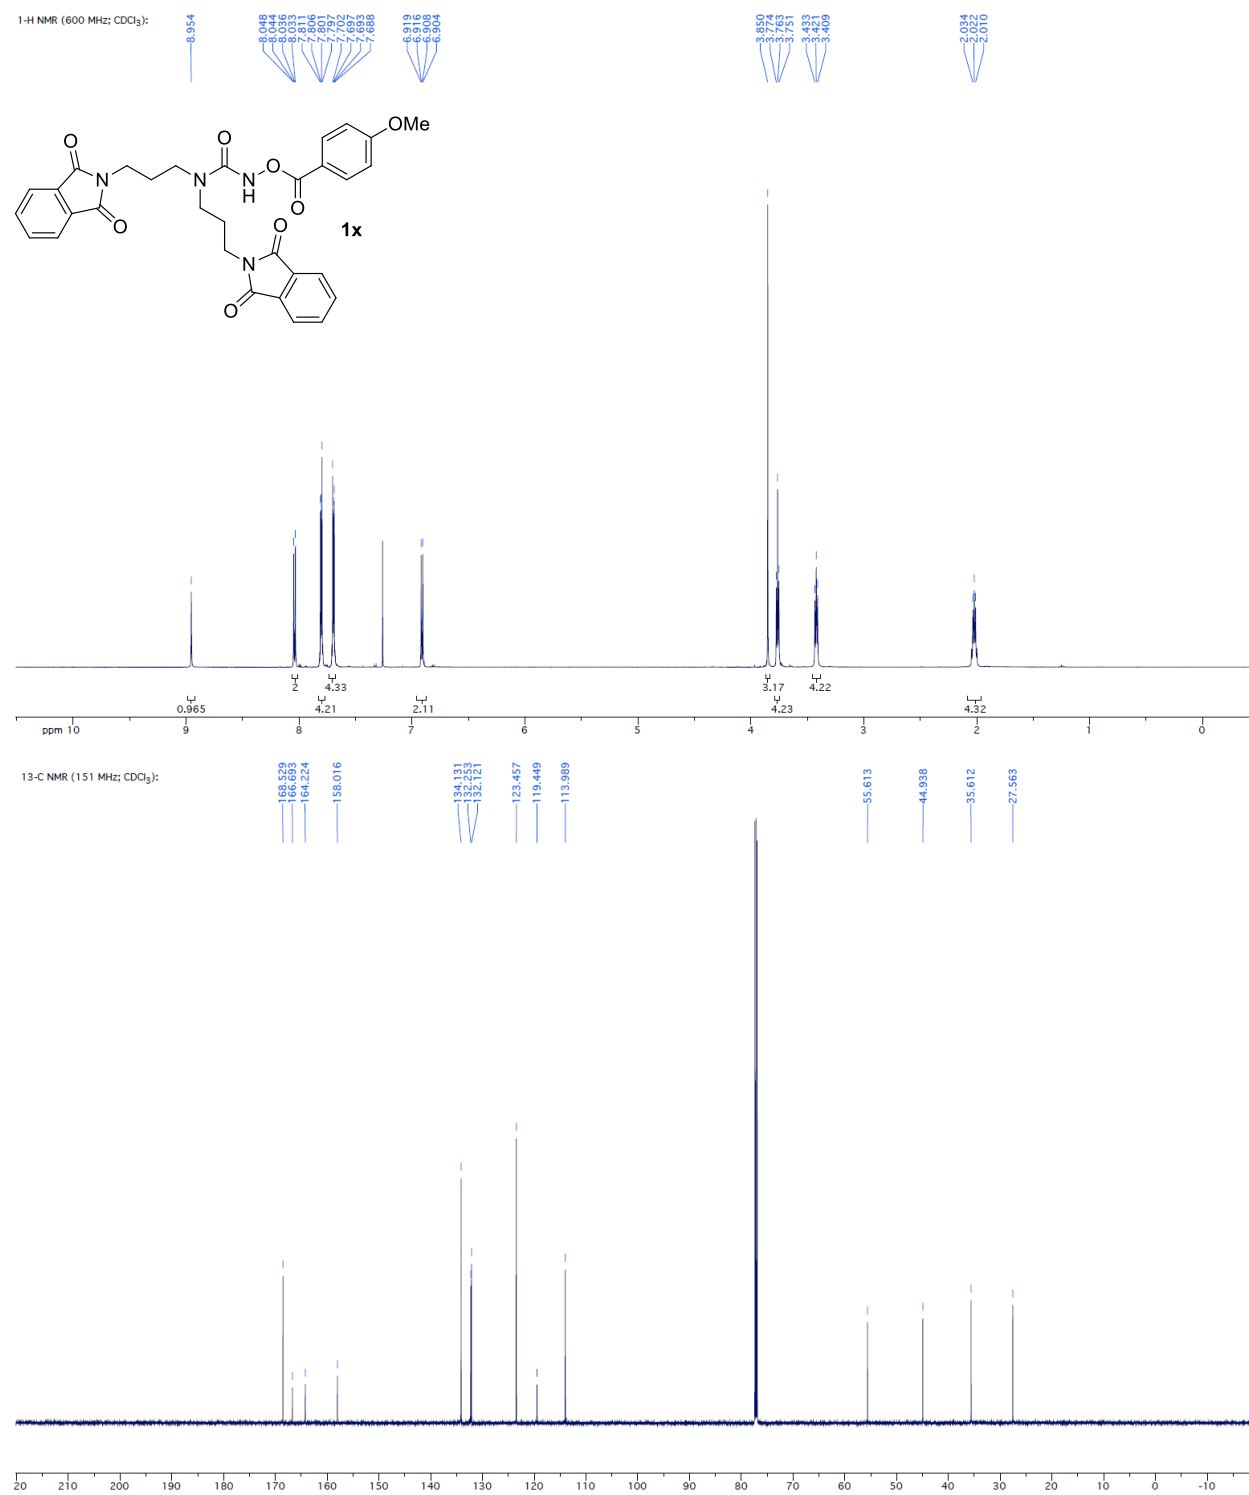

DP-Meallyl-H.1.fid  
1H NMR

(400 MHz, CDCl<sub>3</sub>)

CC(C=C)NC(=O)NOC(=O)c1ccc(OC)cc1  
**1y**

Chemical Shift (ppm)

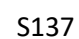

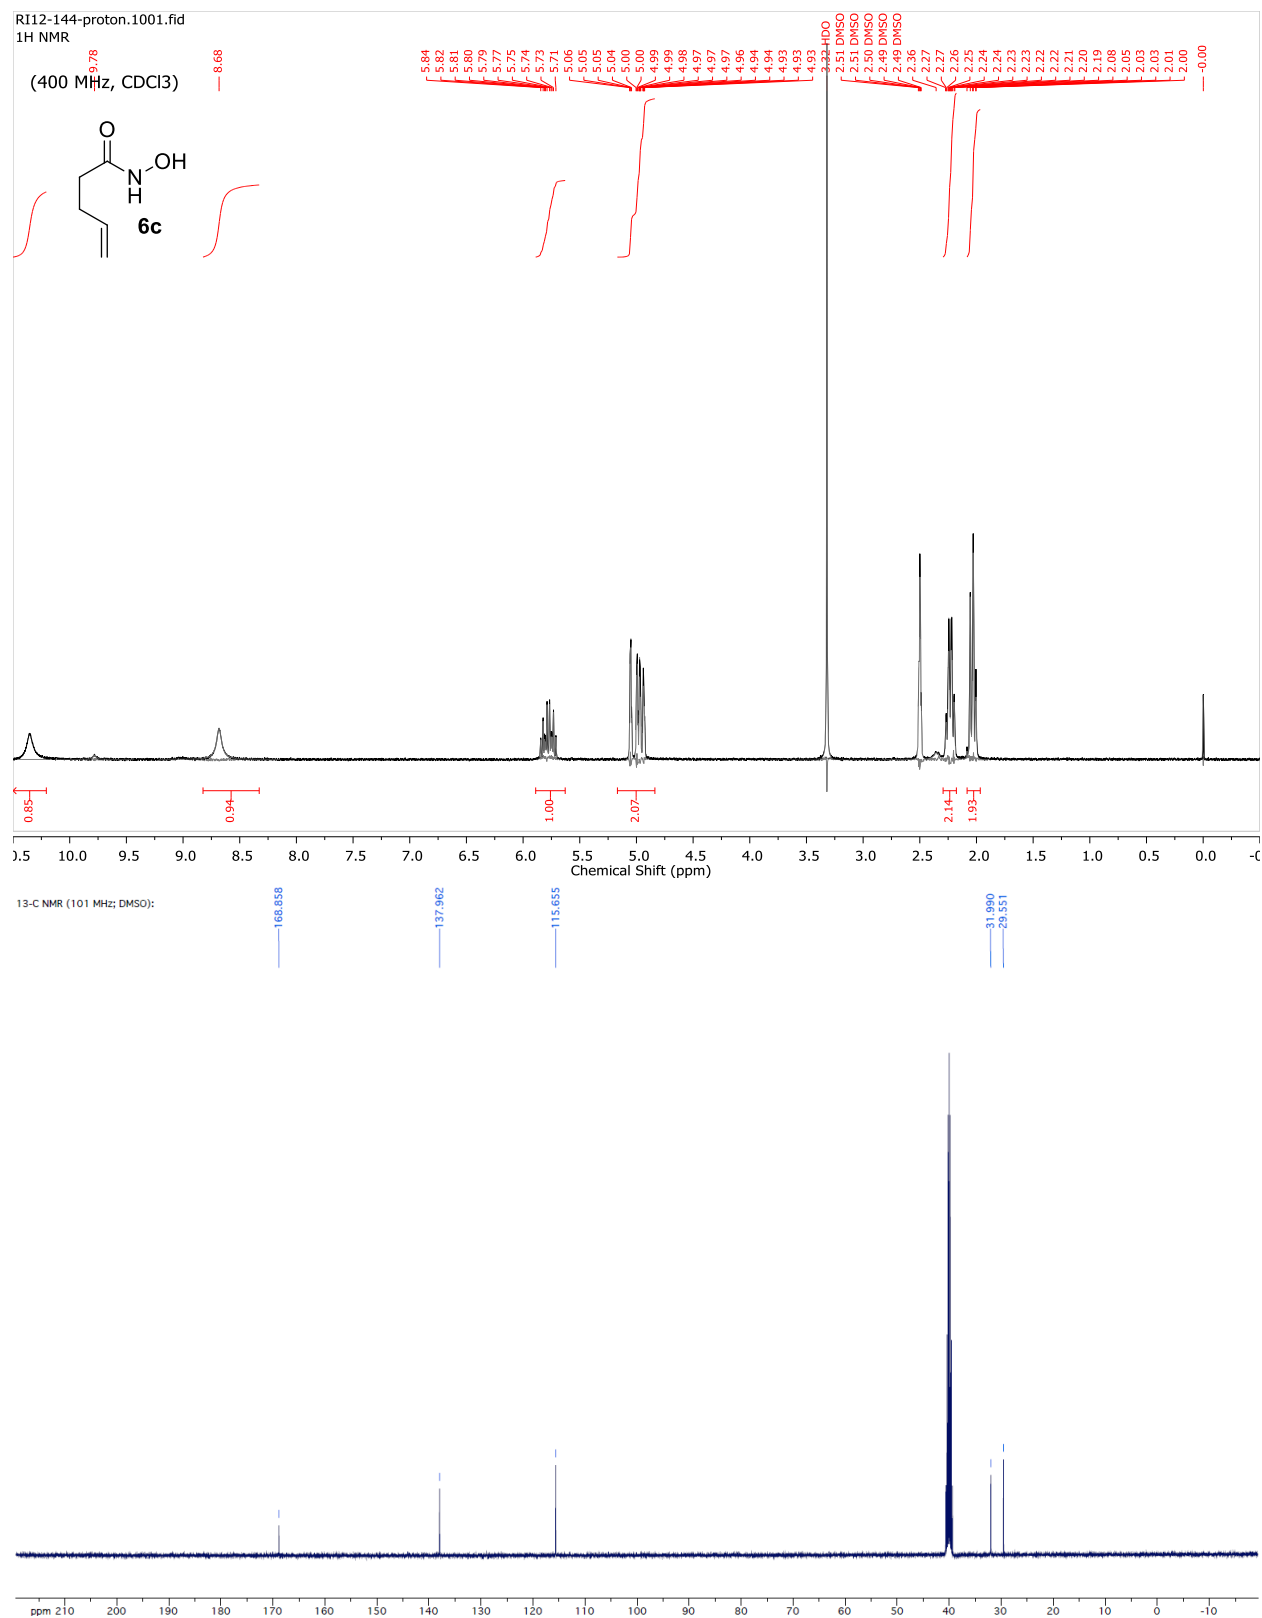

# Supporting Information

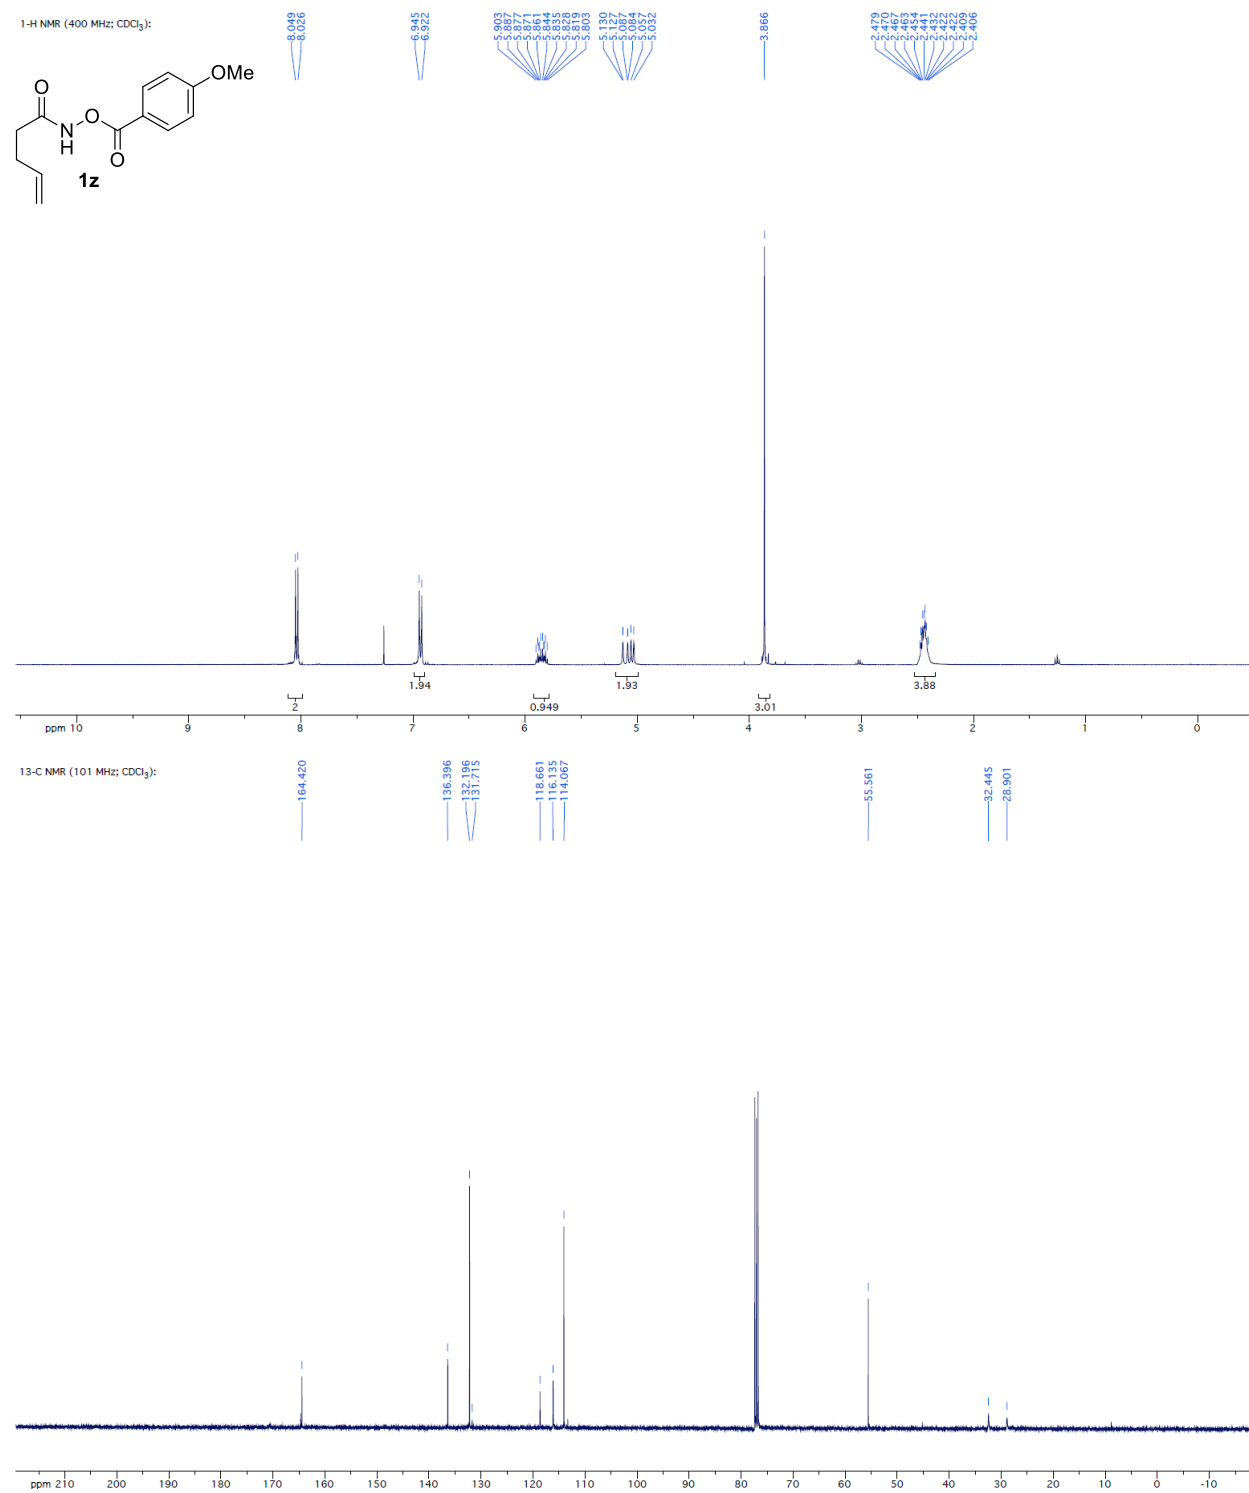

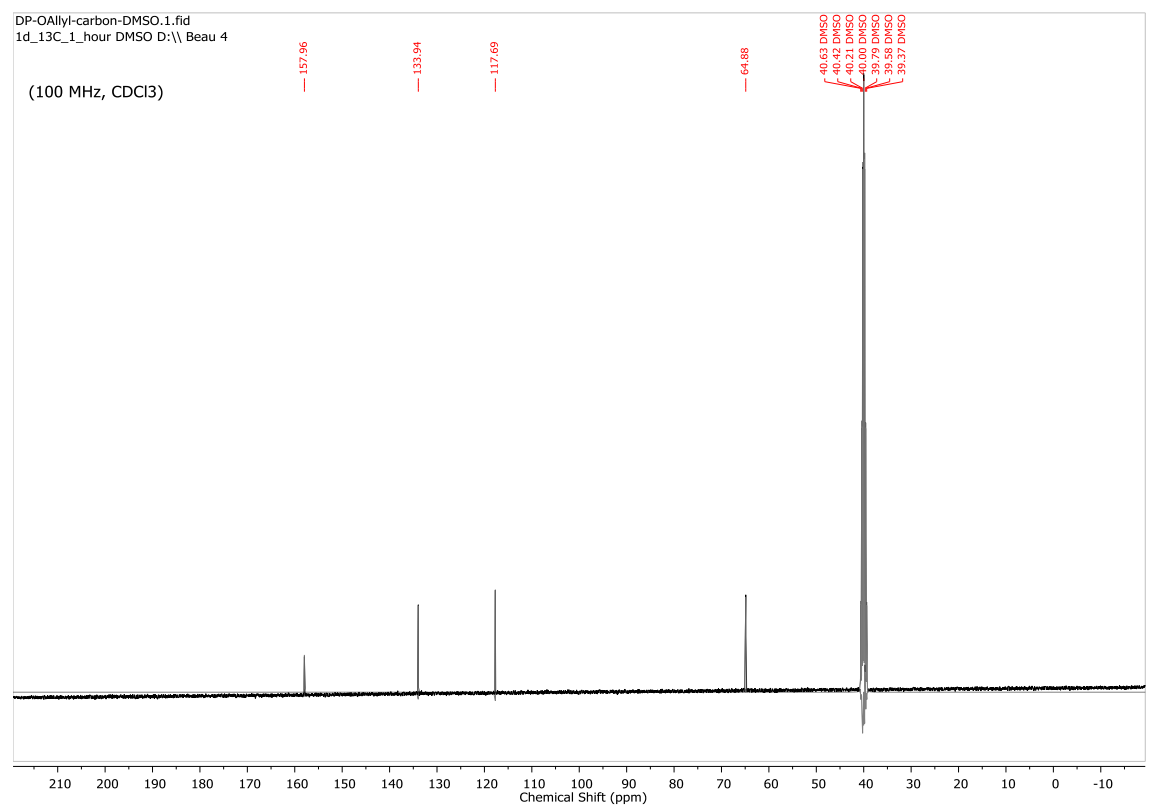



# Supporting Information

<sup>1</sup>H NMR (400 MHz; CDCl<sub>3</sub>):

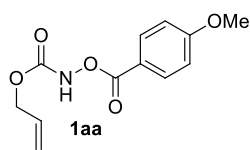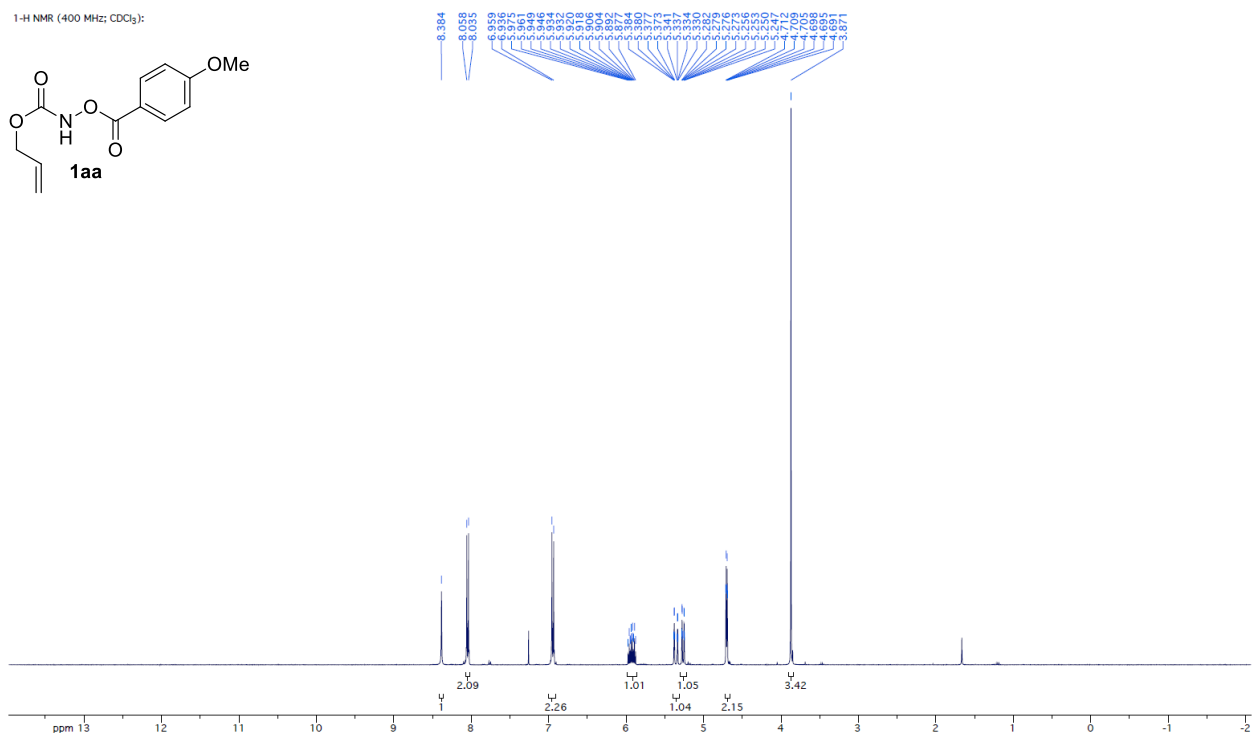

# Supporting Information

1-H NMR (400 MHz; CDCl<sub>3</sub>):

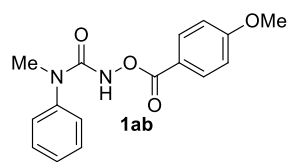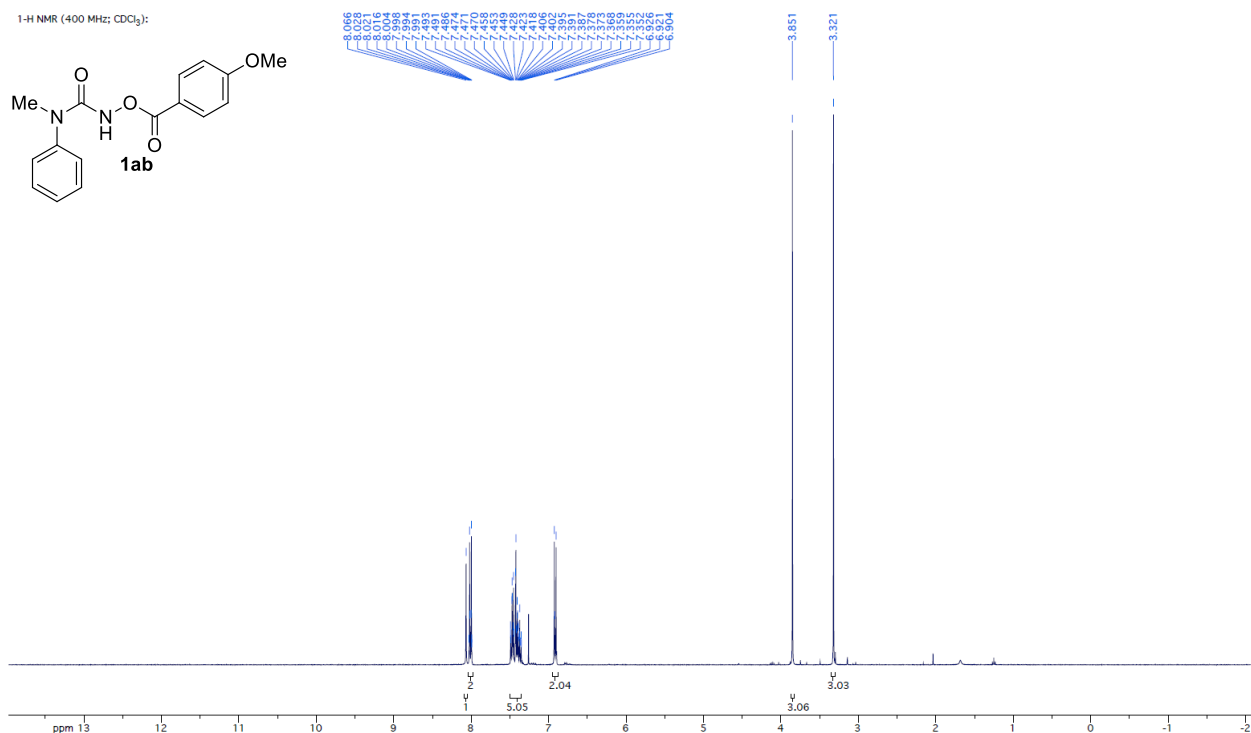

13-C NMR (101 MHz; CDCl<sub>3</sub>):

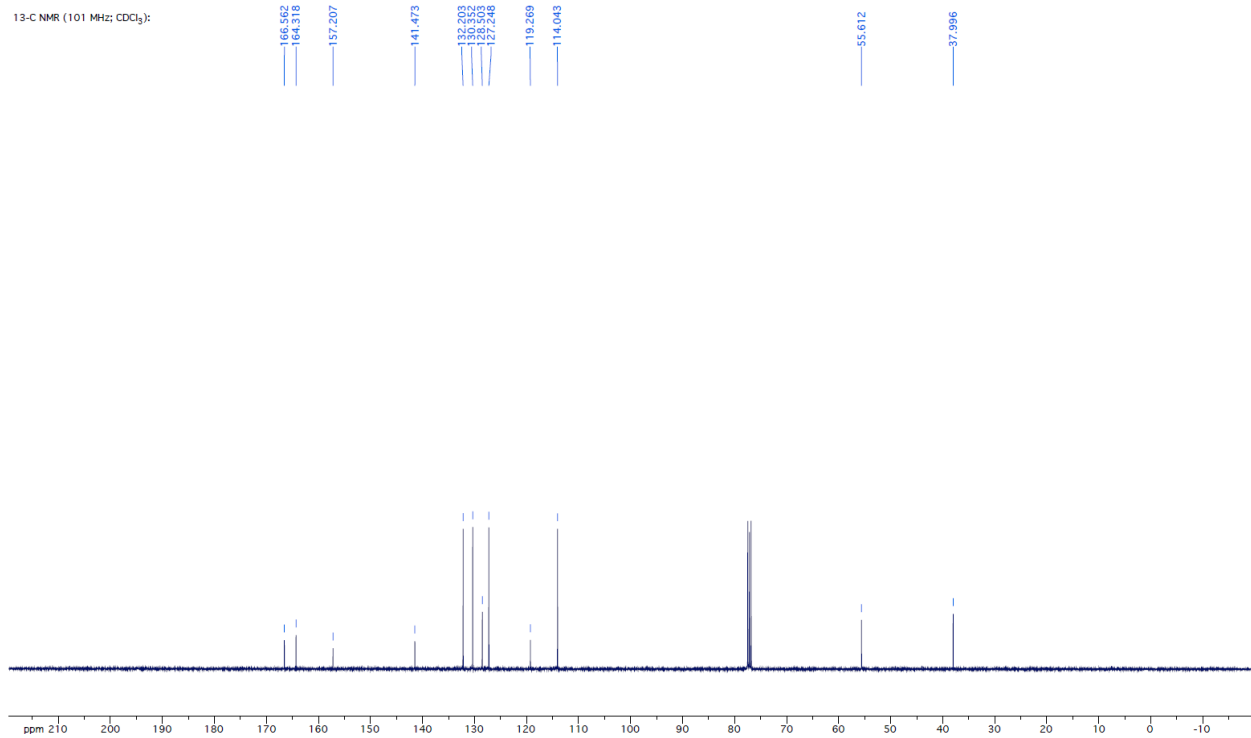

# Supporting Information

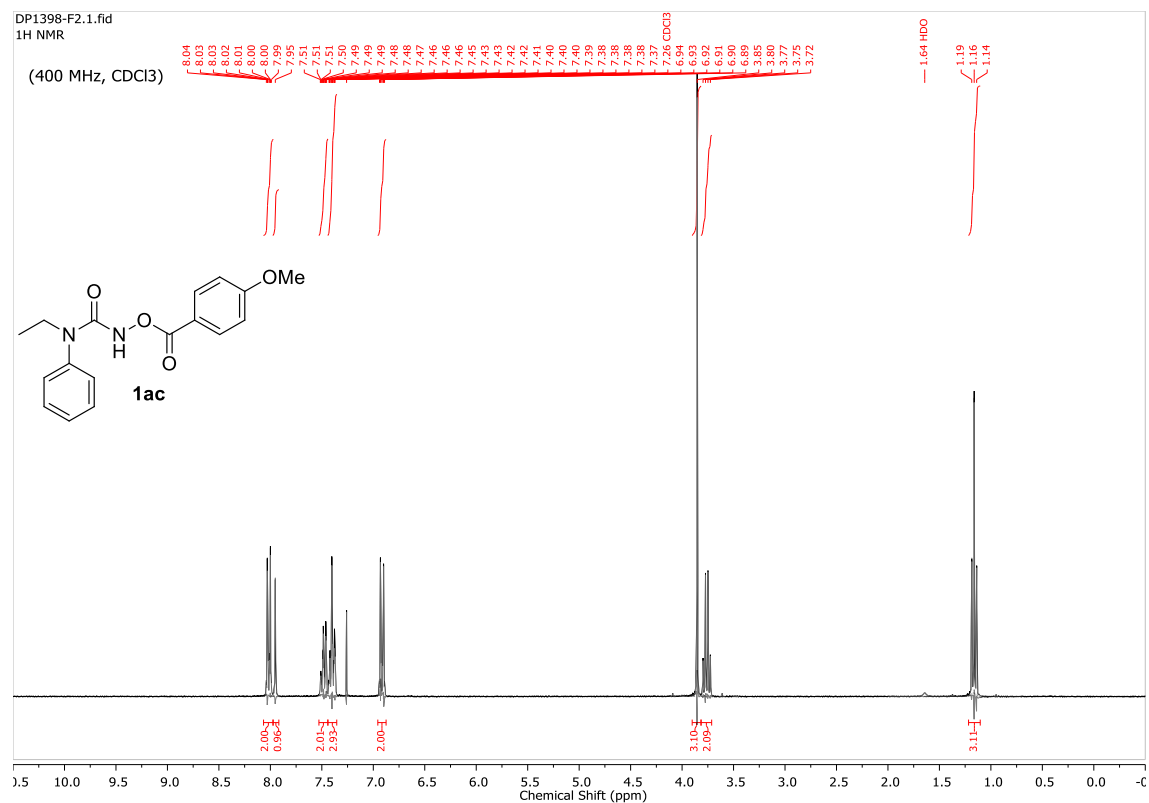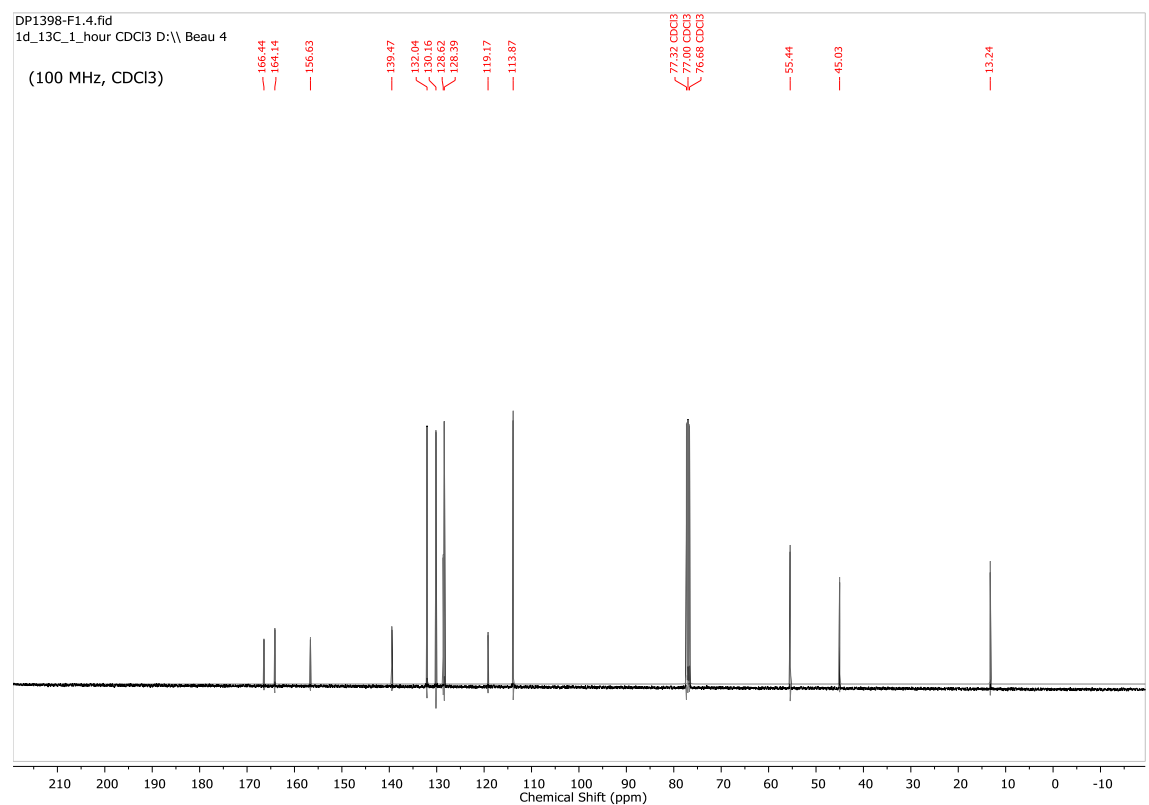

# Supporting Information

<sup>1</sup>H NMR (300 MHz; CDCl<sub>3</sub>):

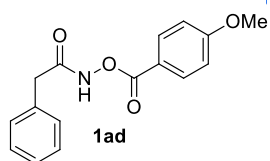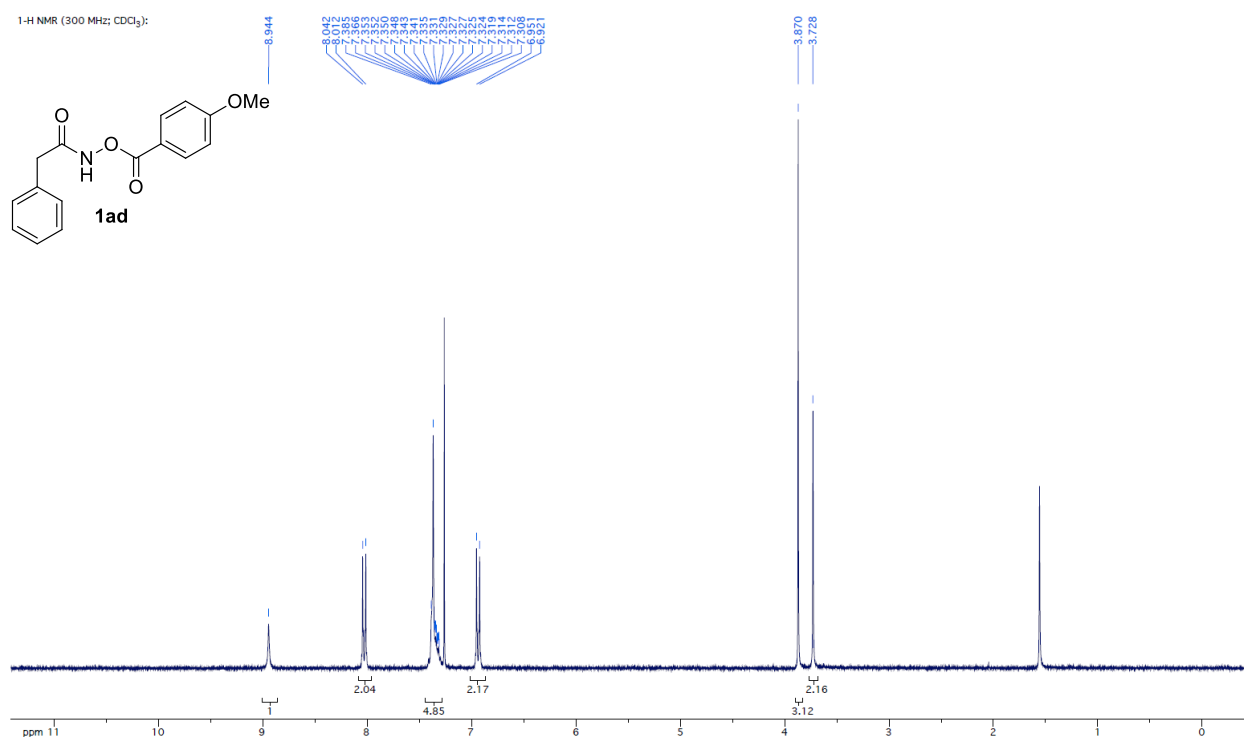

<sup>13</sup>C NMR (151 MHz; CDCl<sub>3</sub>):

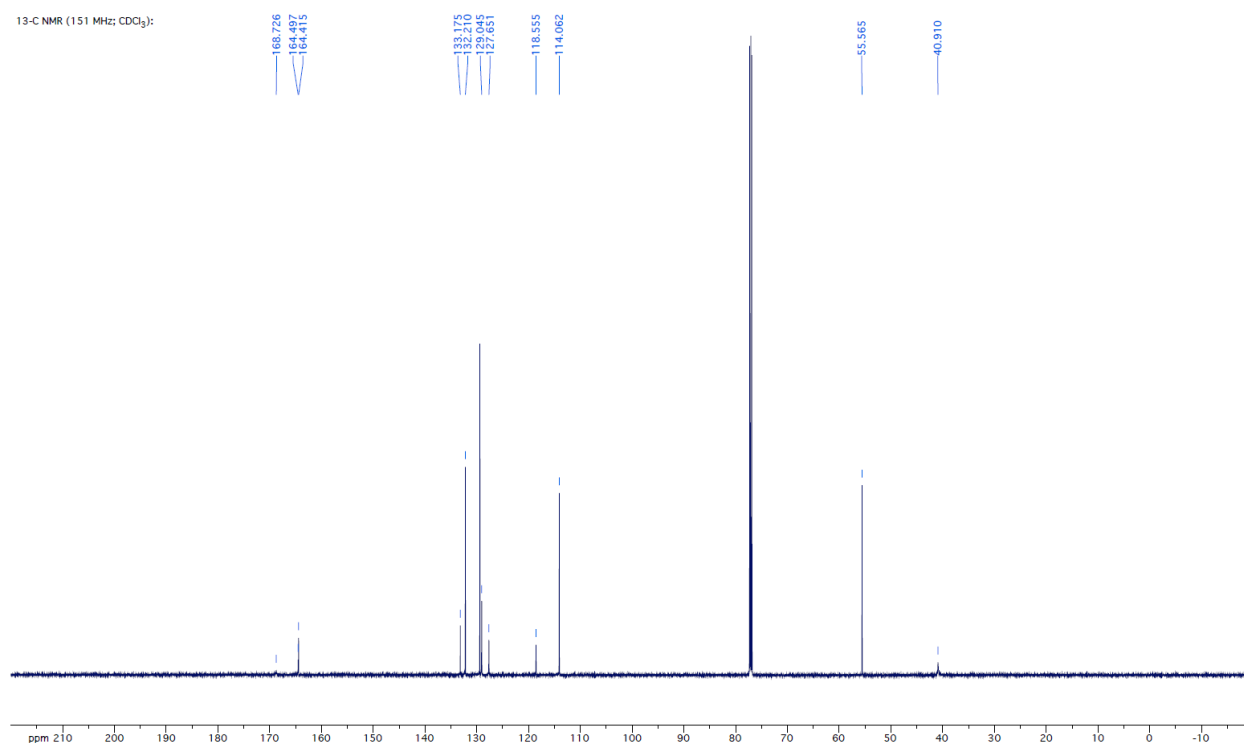

# Supporting Information

<sup>1</sup>H NMR (400 MHz; CDCl<sub>3</sub>):

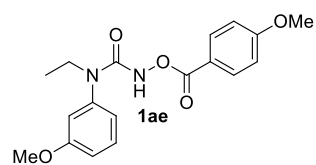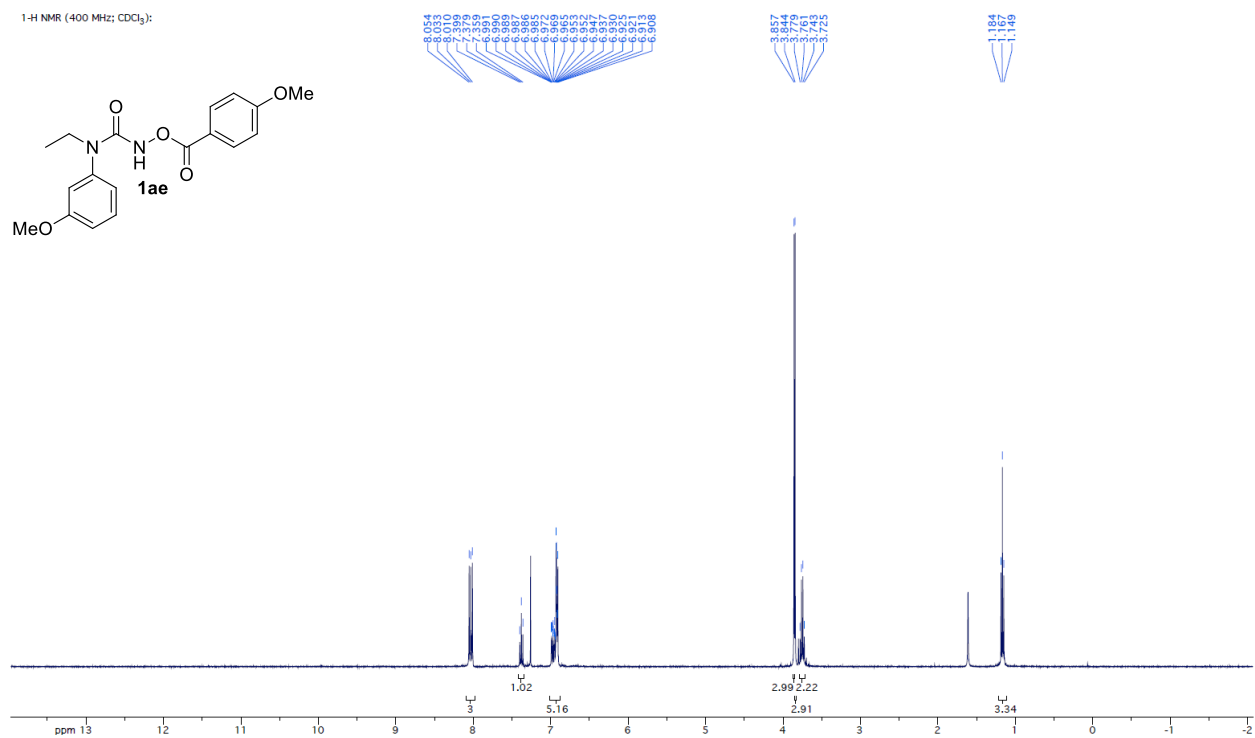

<sup>13</sup>C NMR (151 MHz; CDCl<sub>3</sub>):

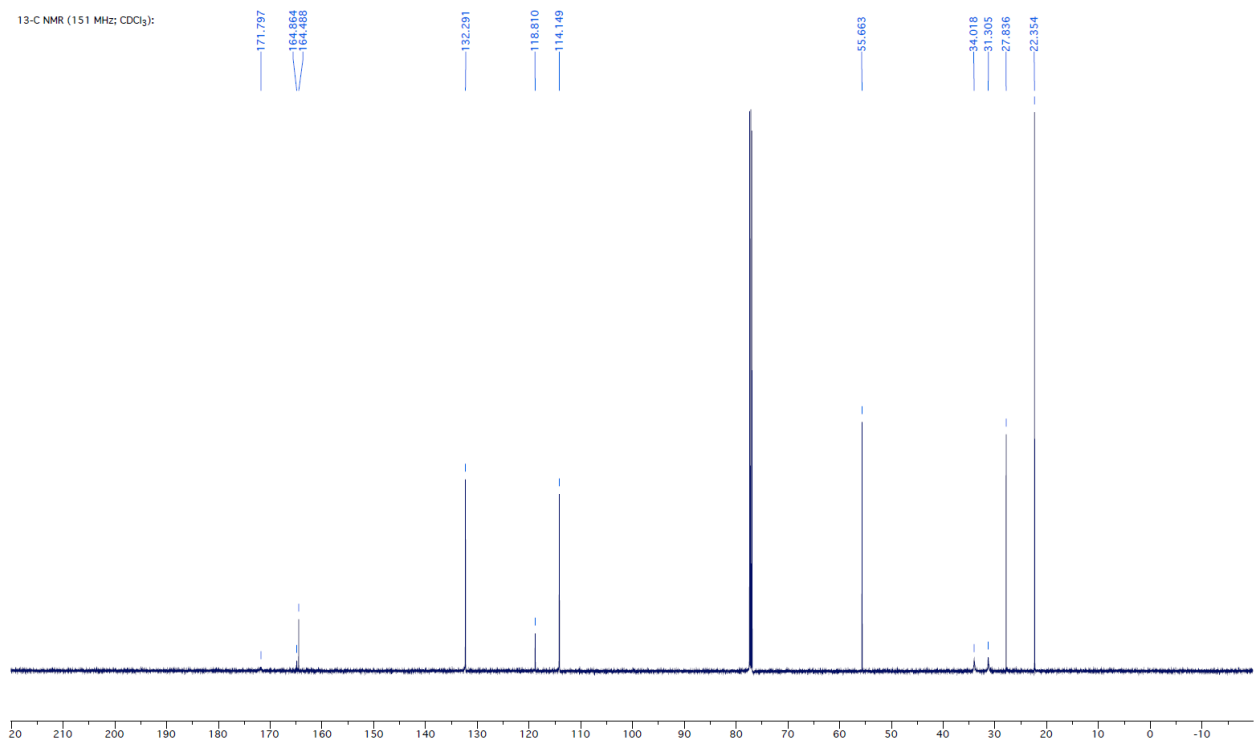

# Supporting Information

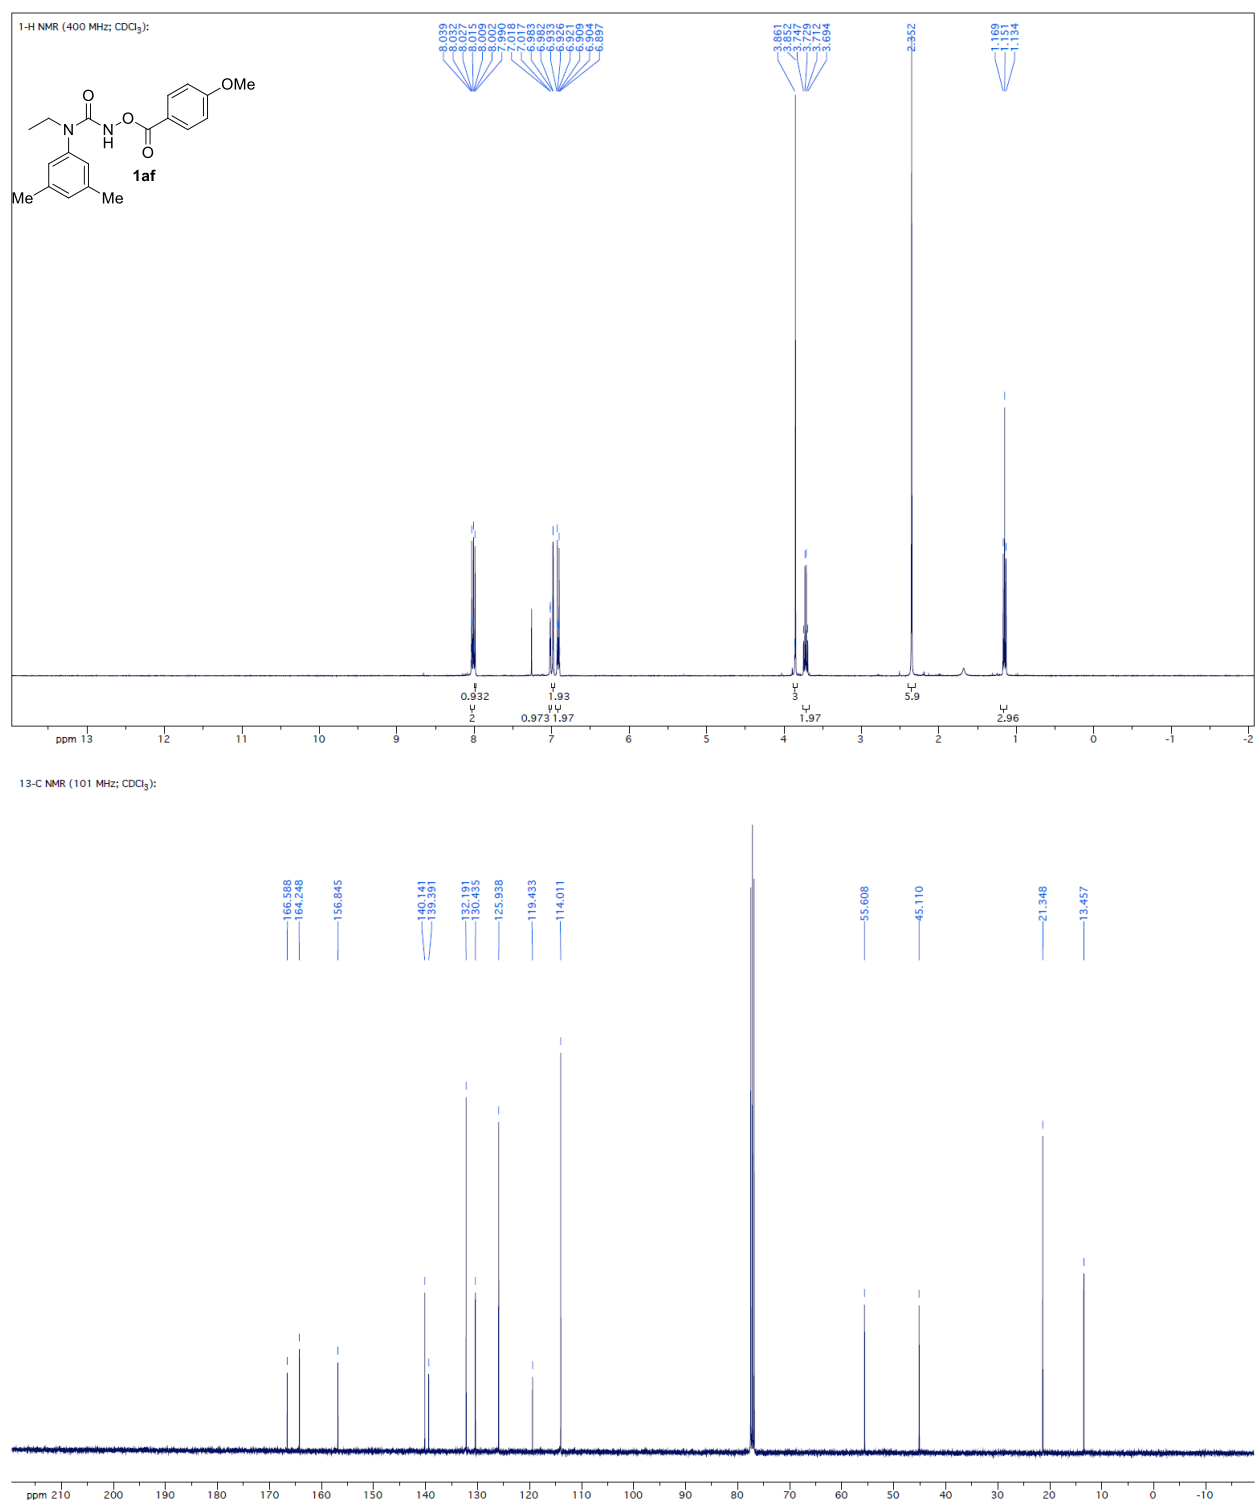

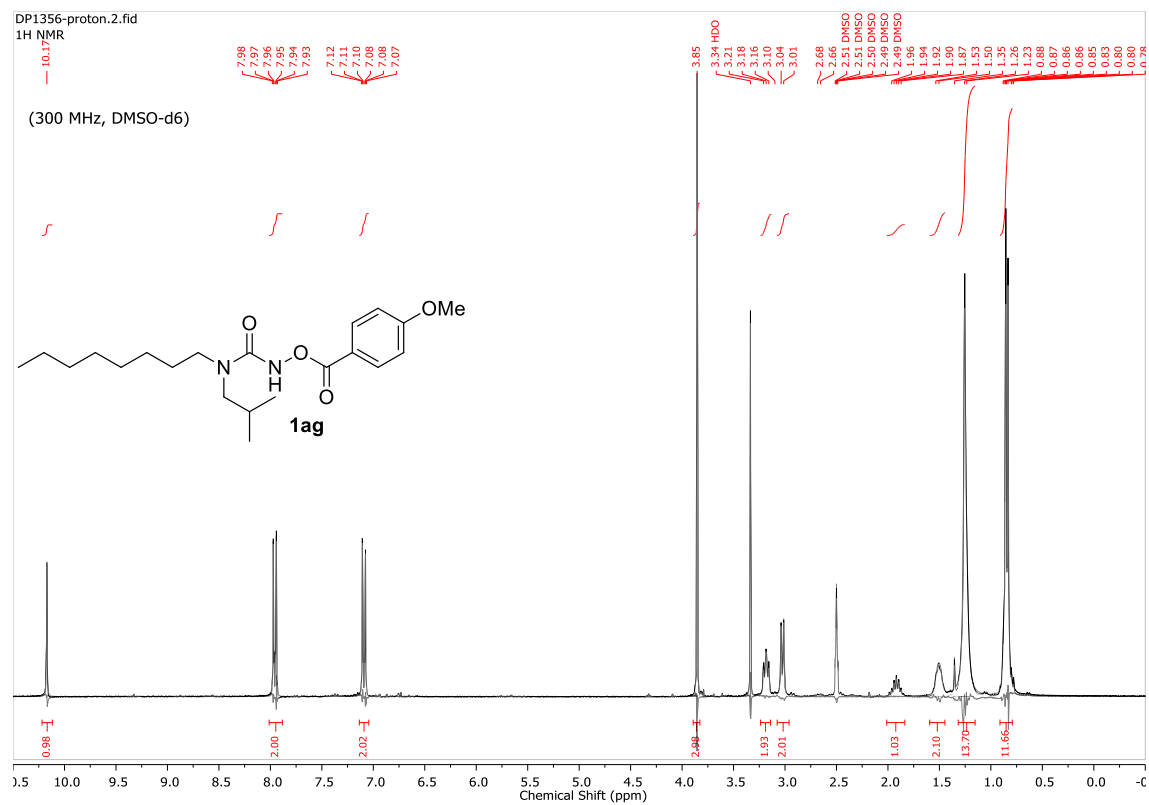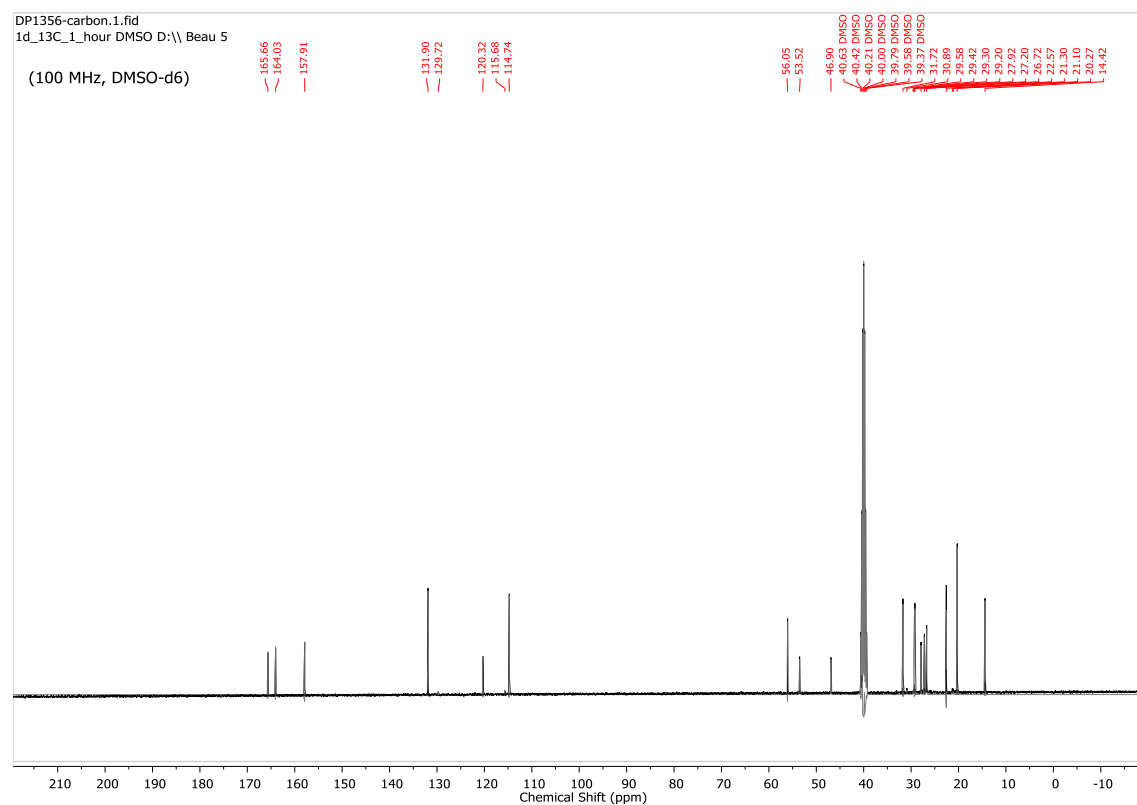

<sup>1</sup>H NMR (400 MHz; CDCl<sub>3</sub>):

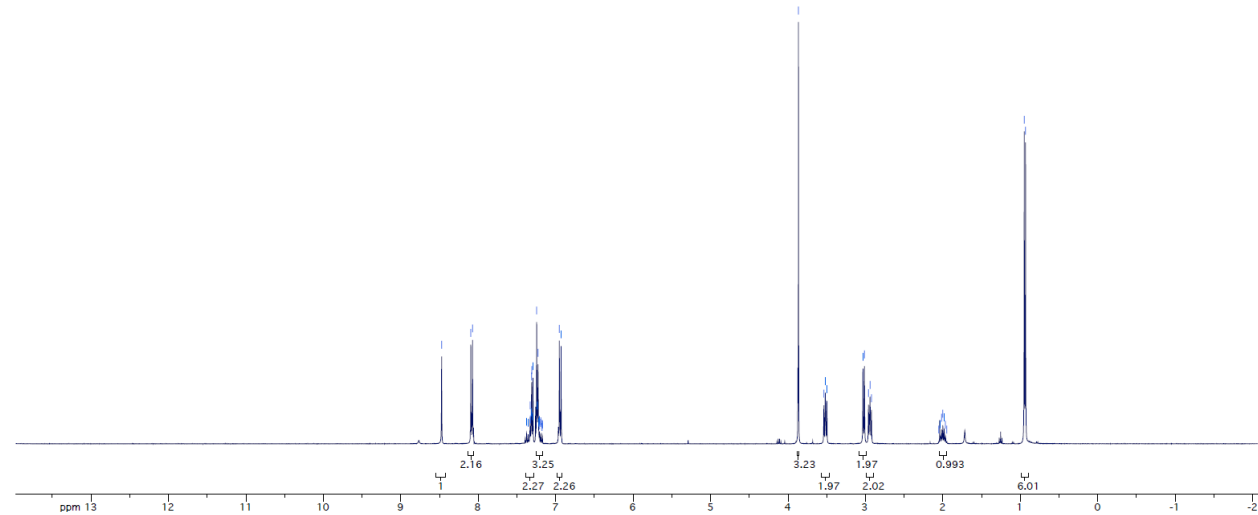

<sup>13</sup>C NMR (101 MHz; CDCl<sub>3</sub>):

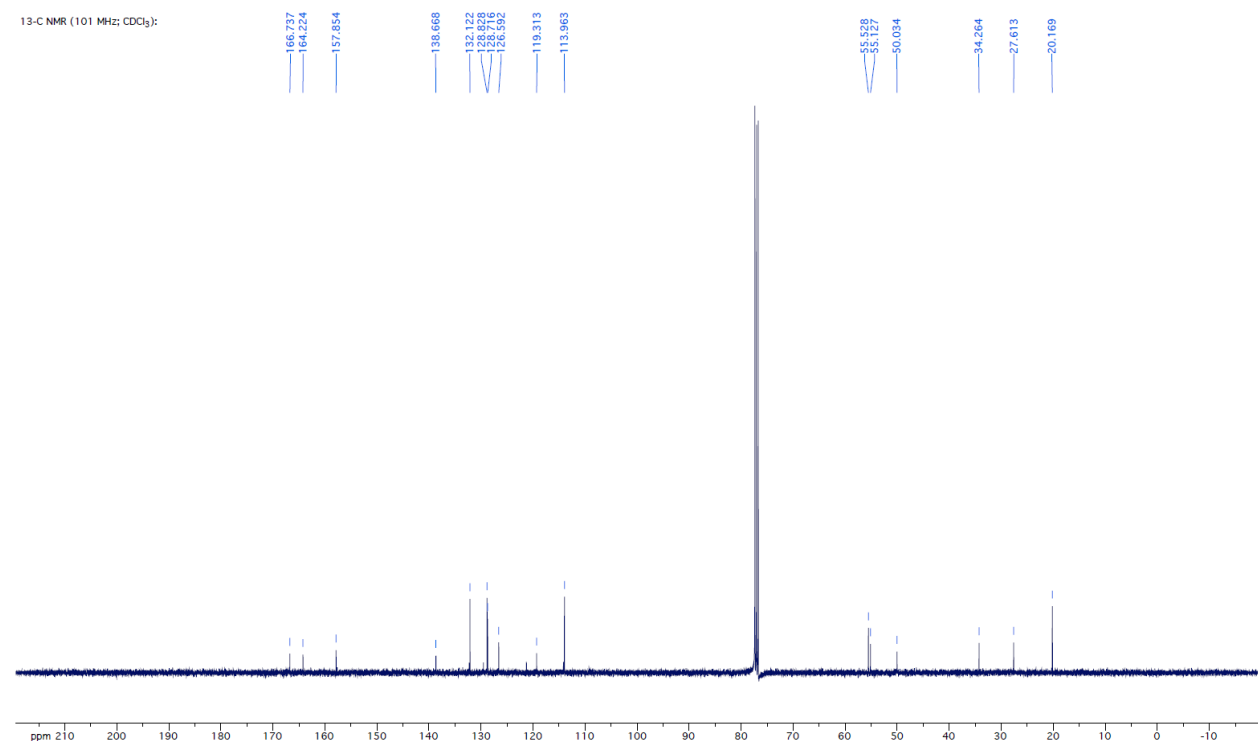



# Supporting Information

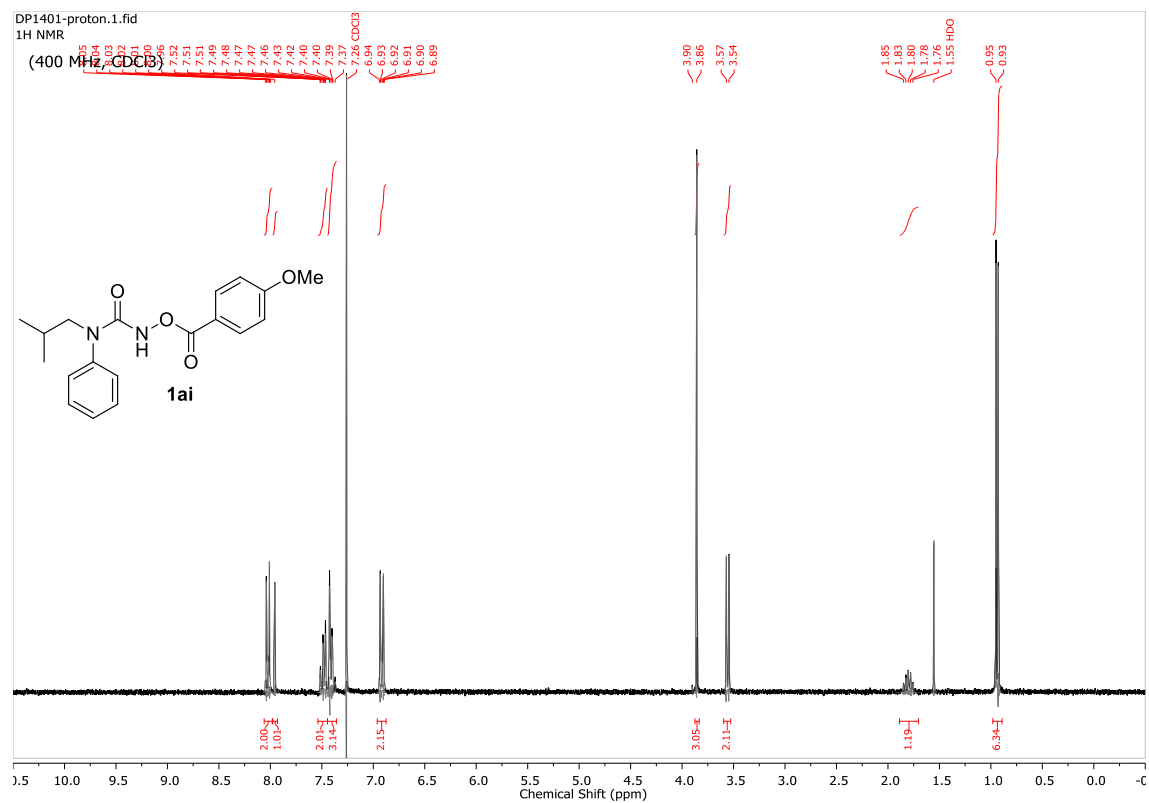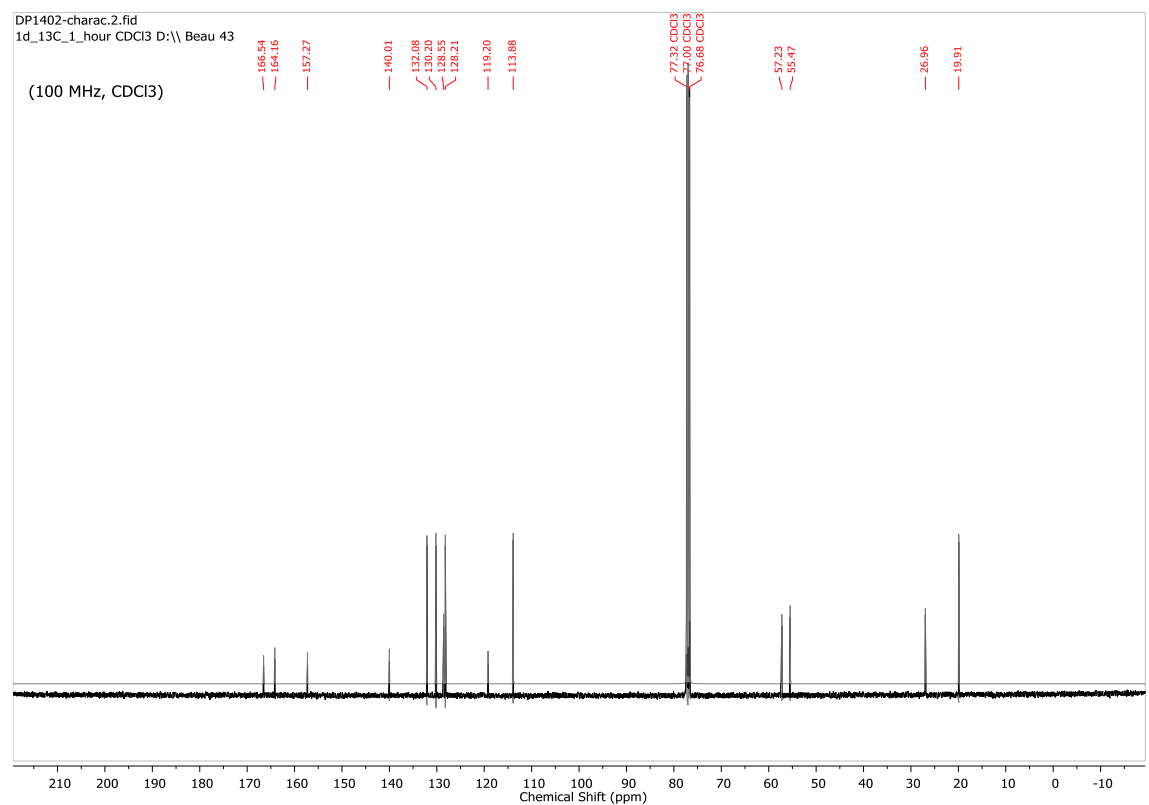

# Supporting Information

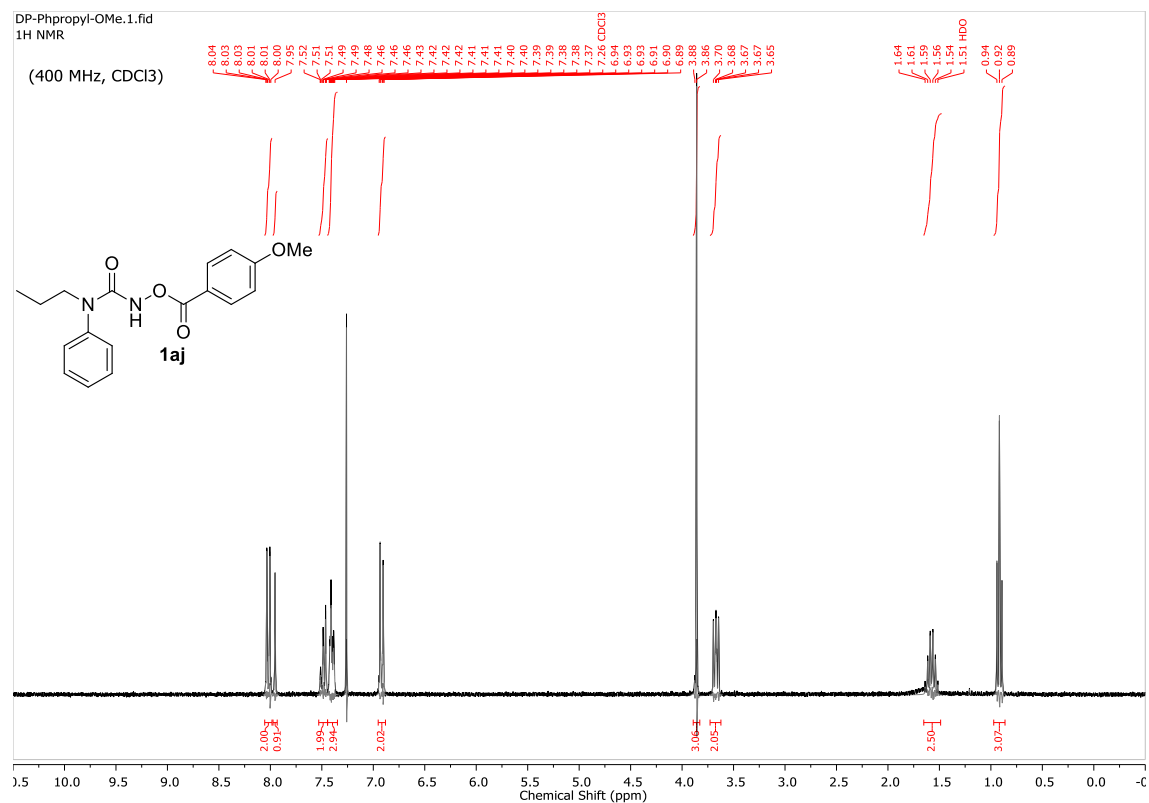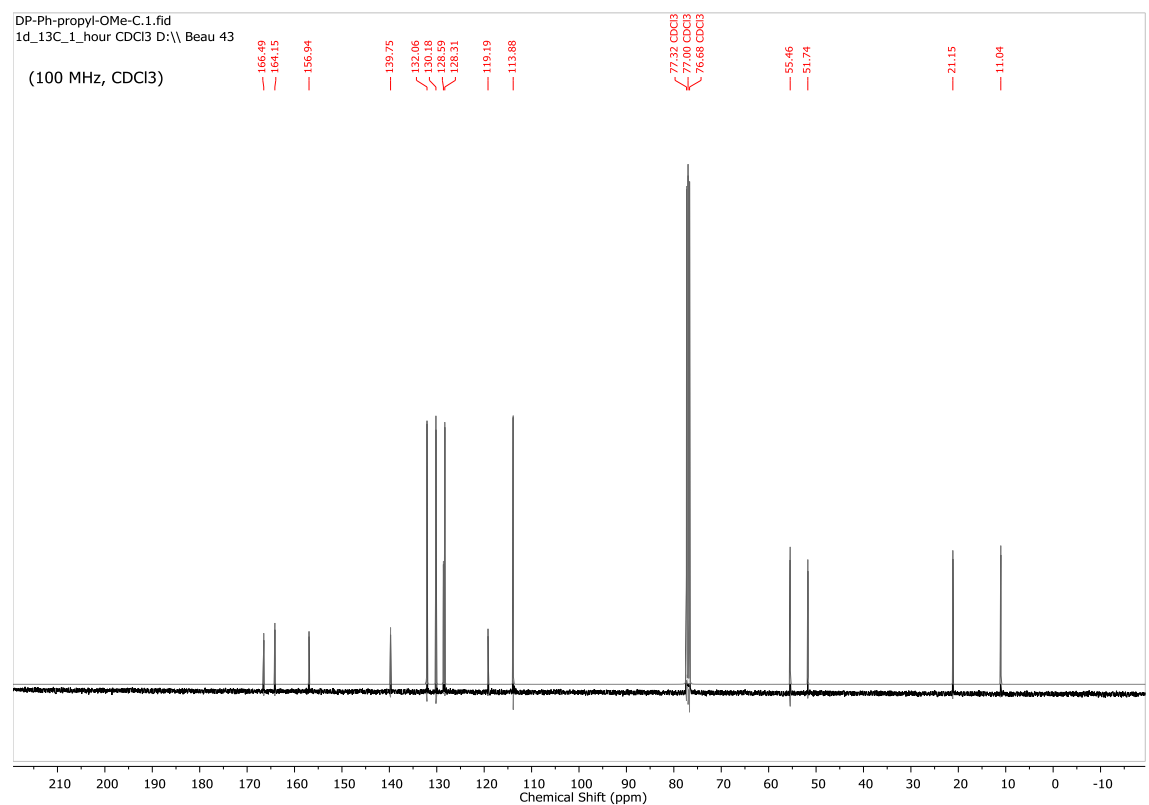

# Supporting Information

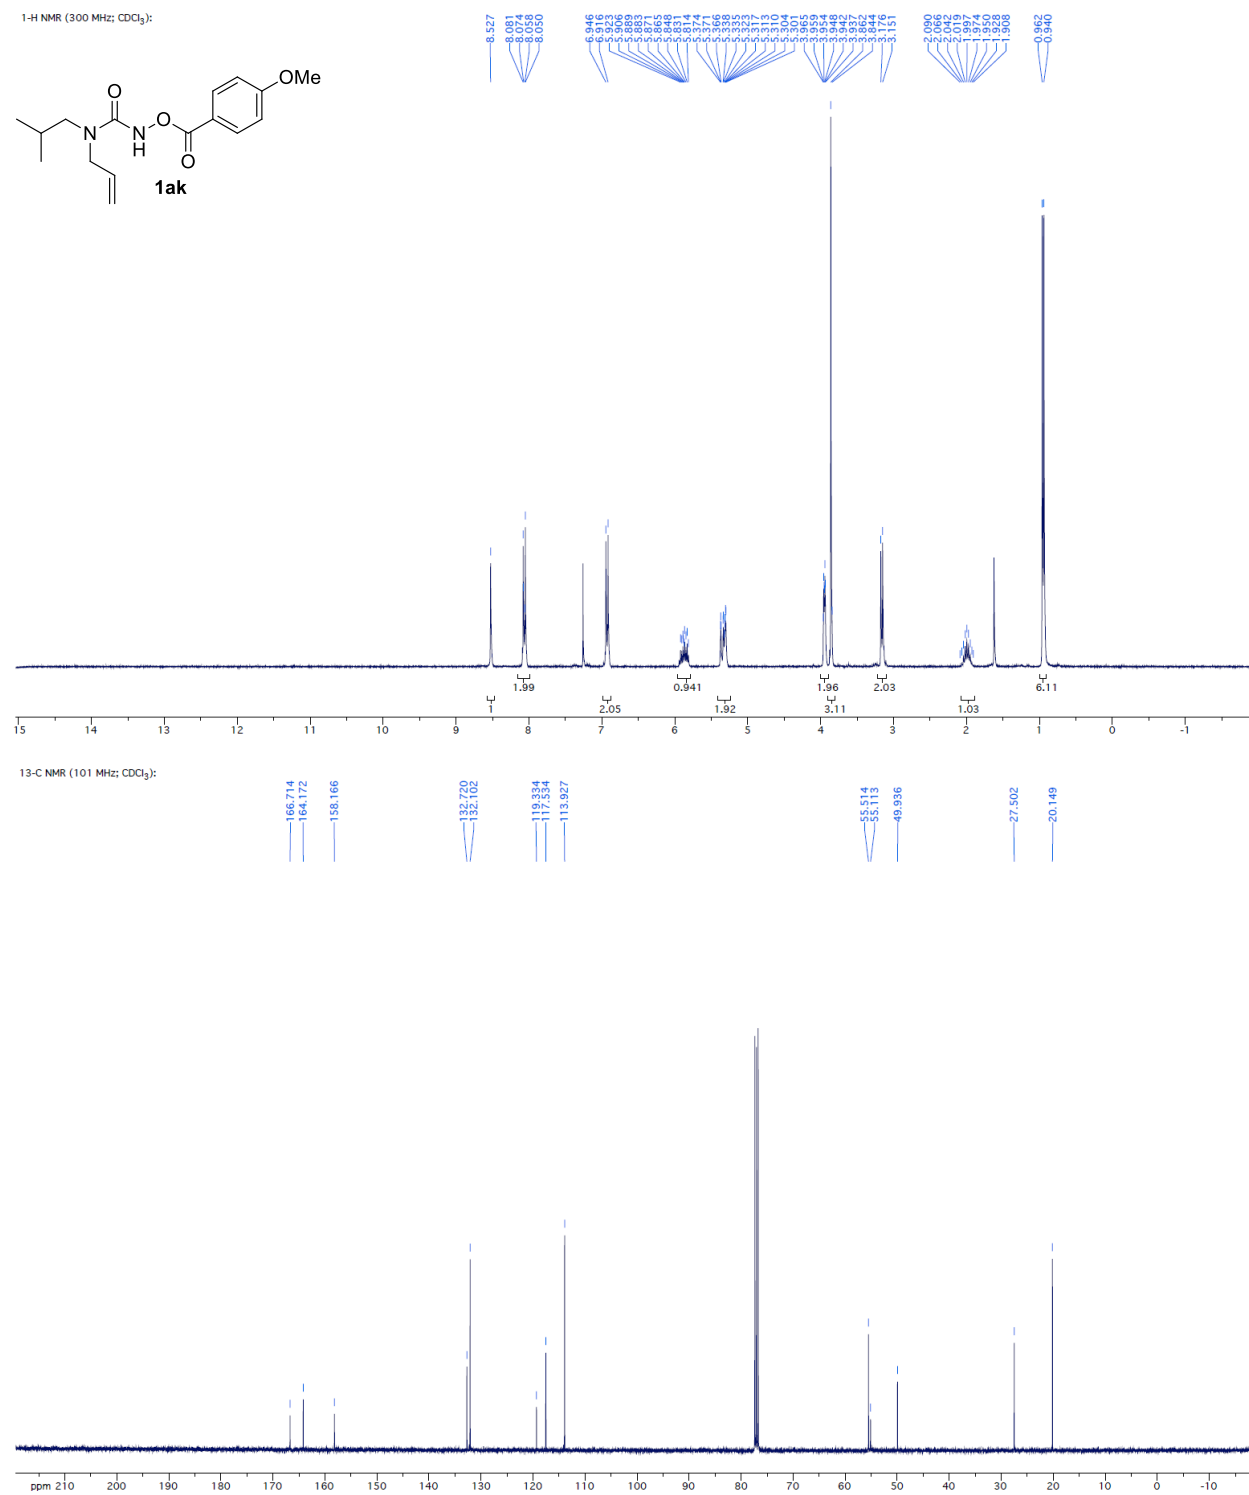

# Supporting Information

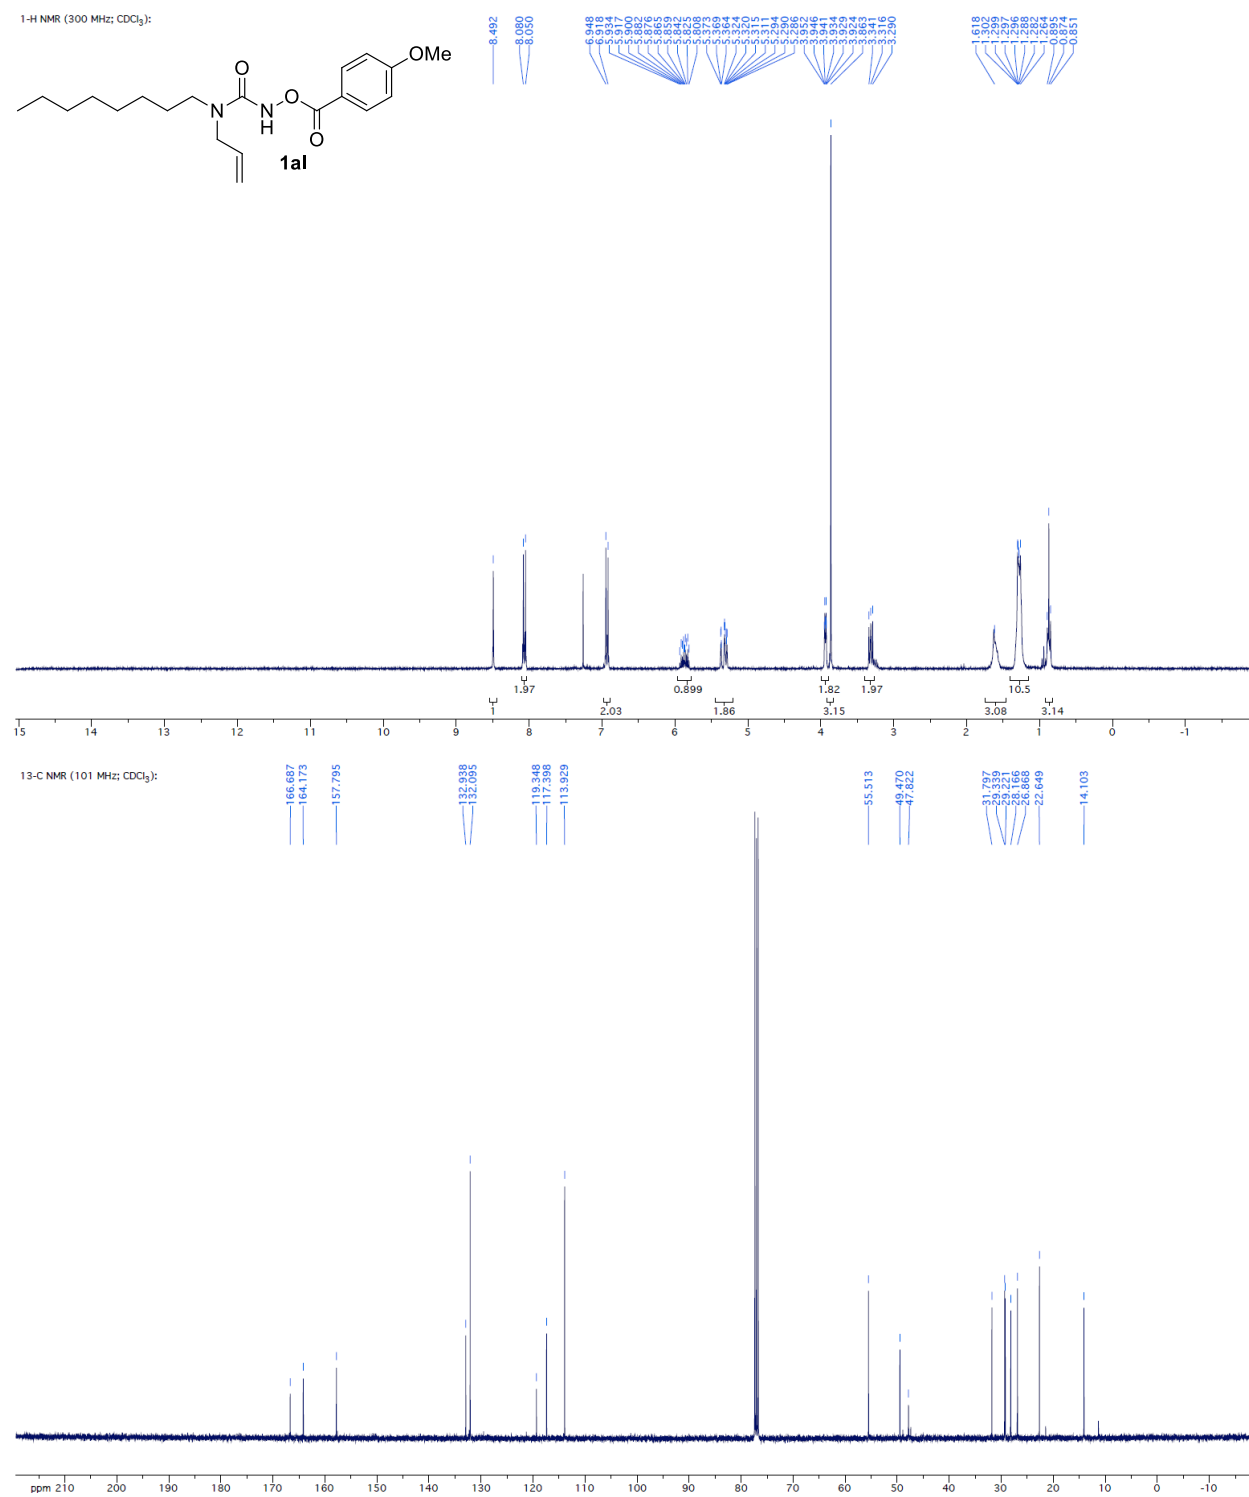

# Supporting Information

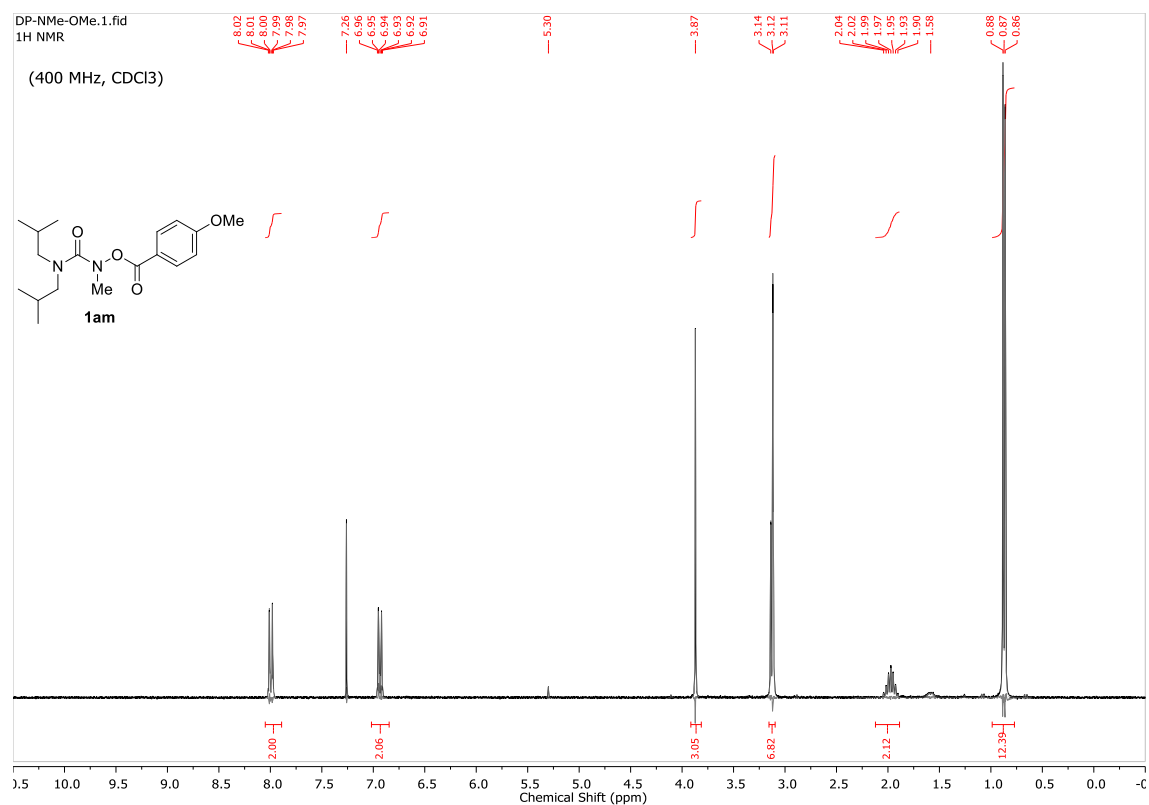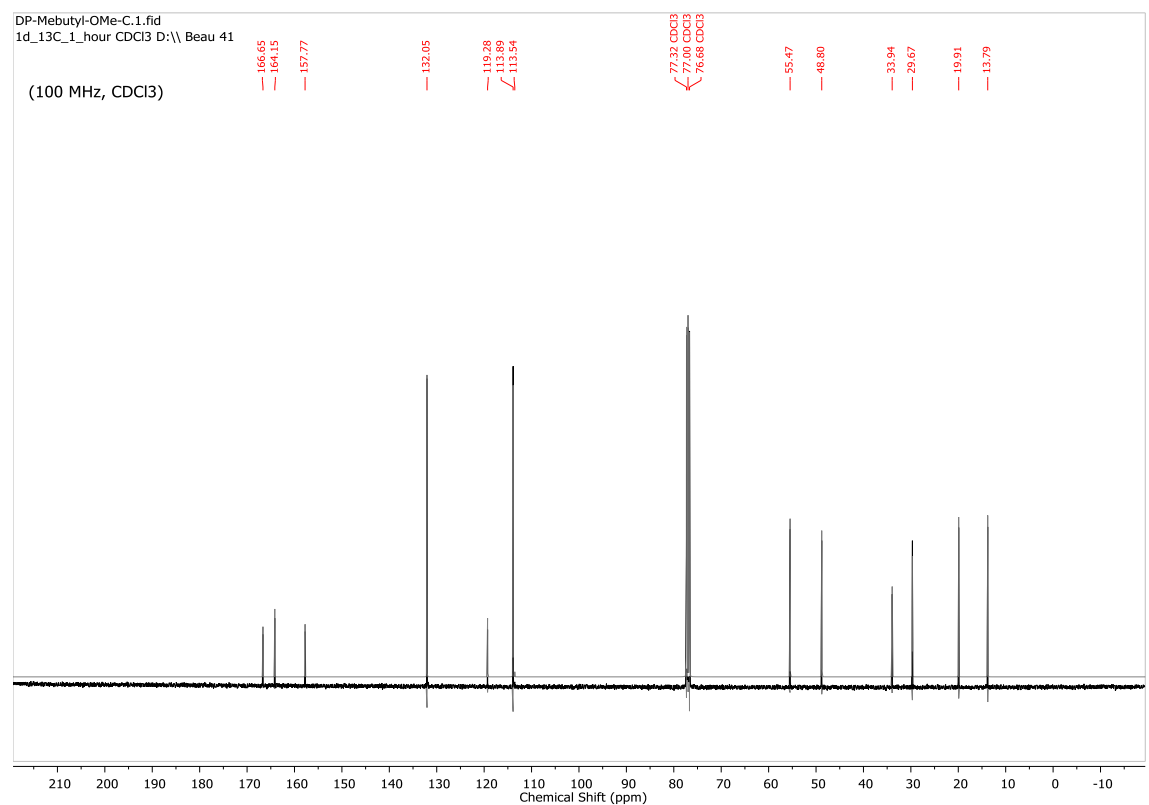

# Supporting Information

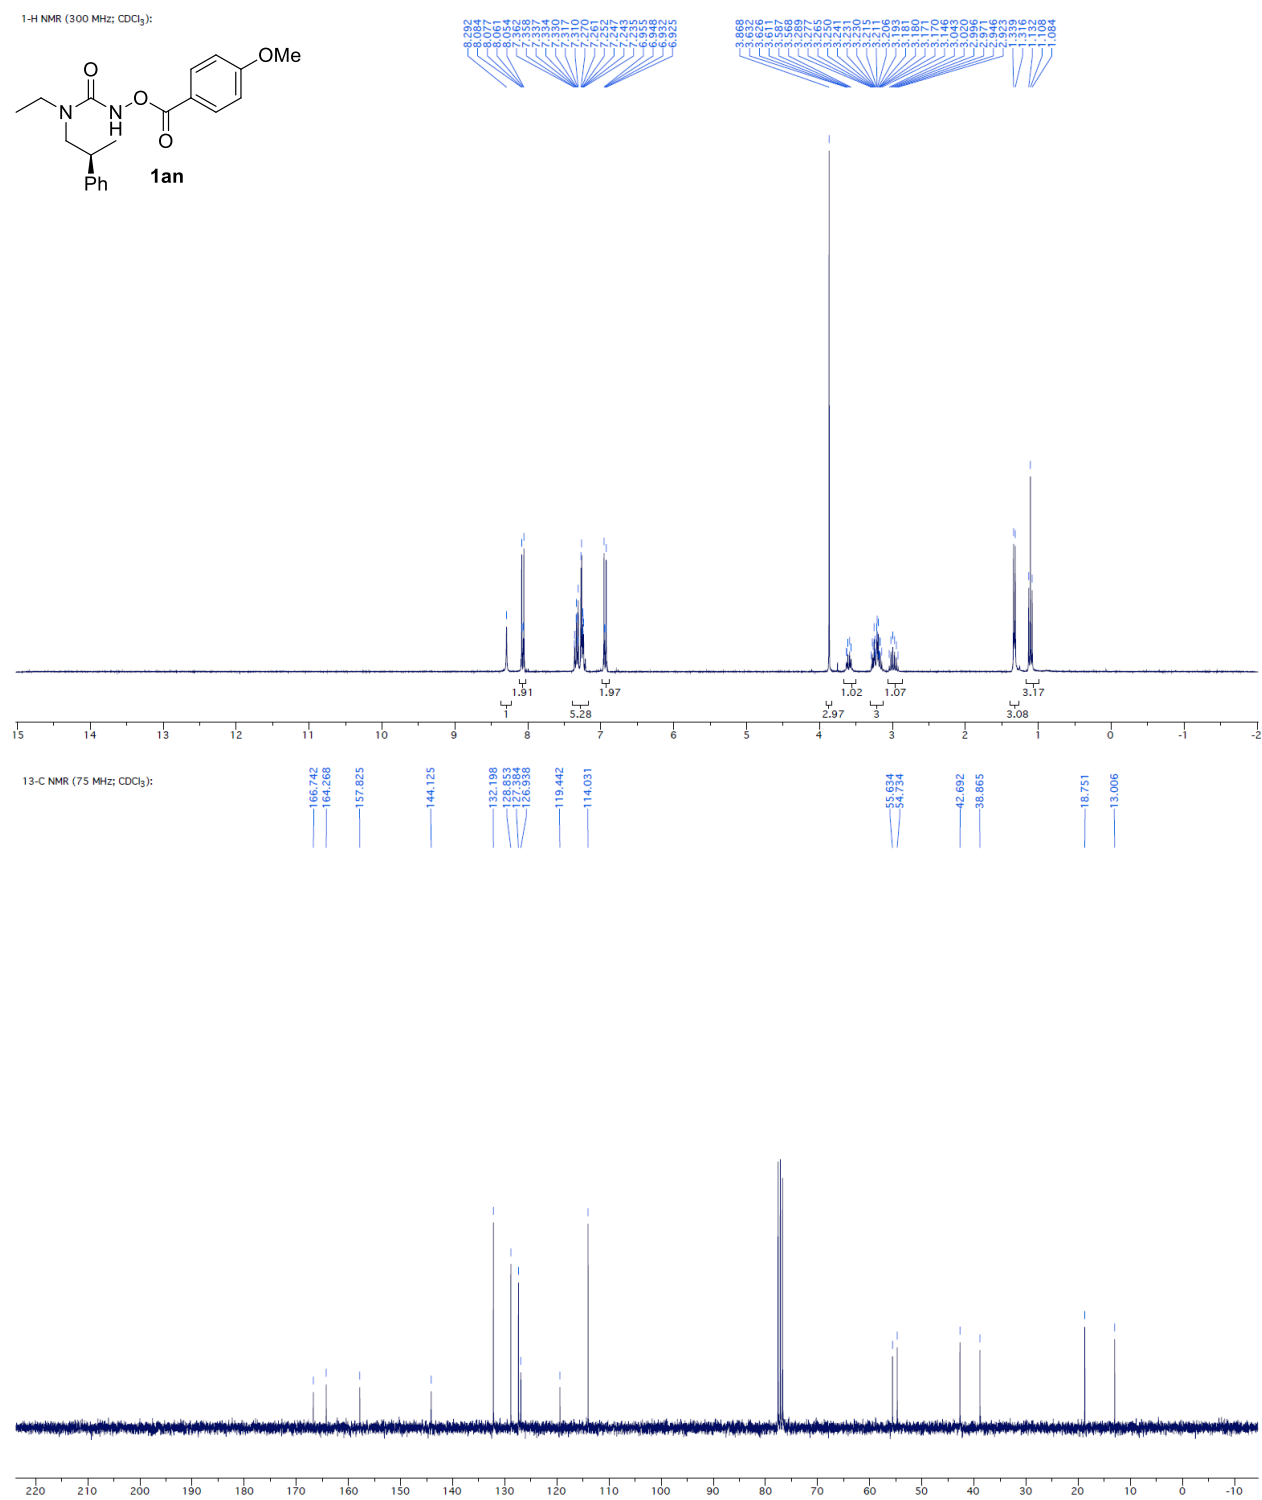

# Supporting Information

<sup>1</sup>H NMR (400 MHz; CDCl<sub>3</sub>):

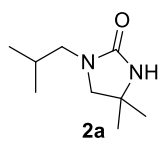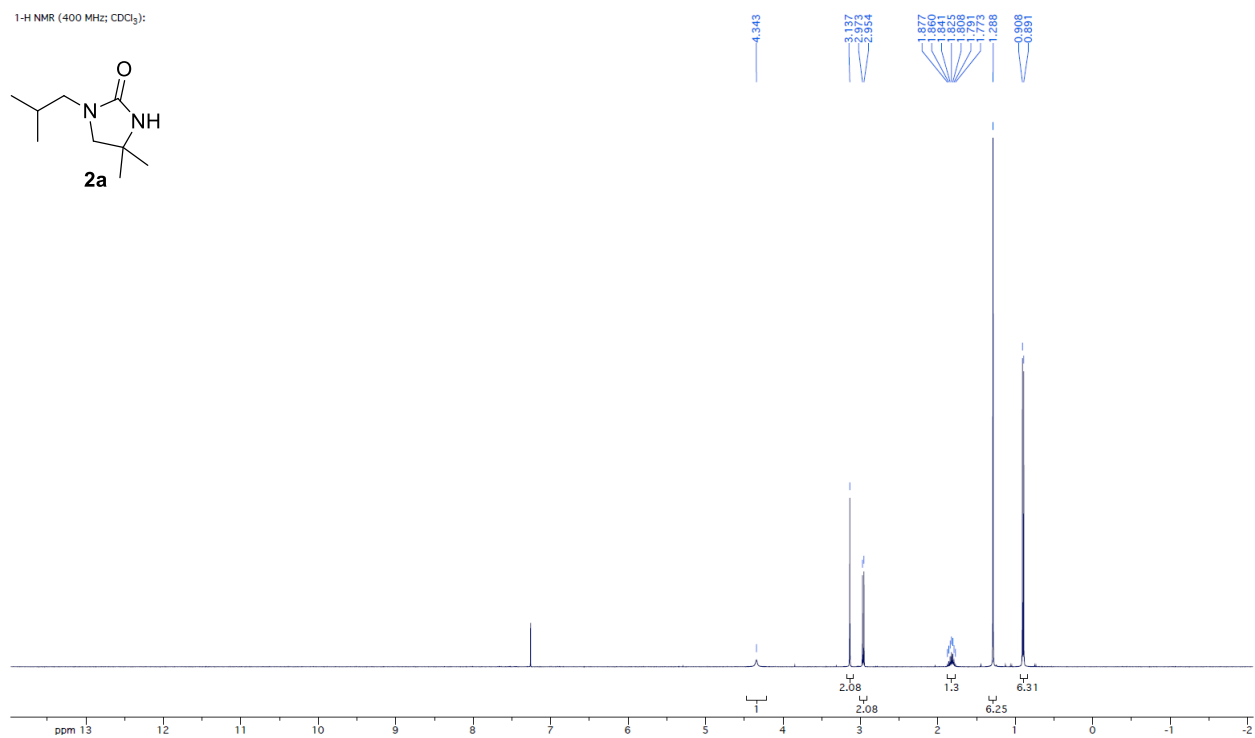

<sup>13</sup>C NMR (101 MHz; CDCl<sub>3</sub>):

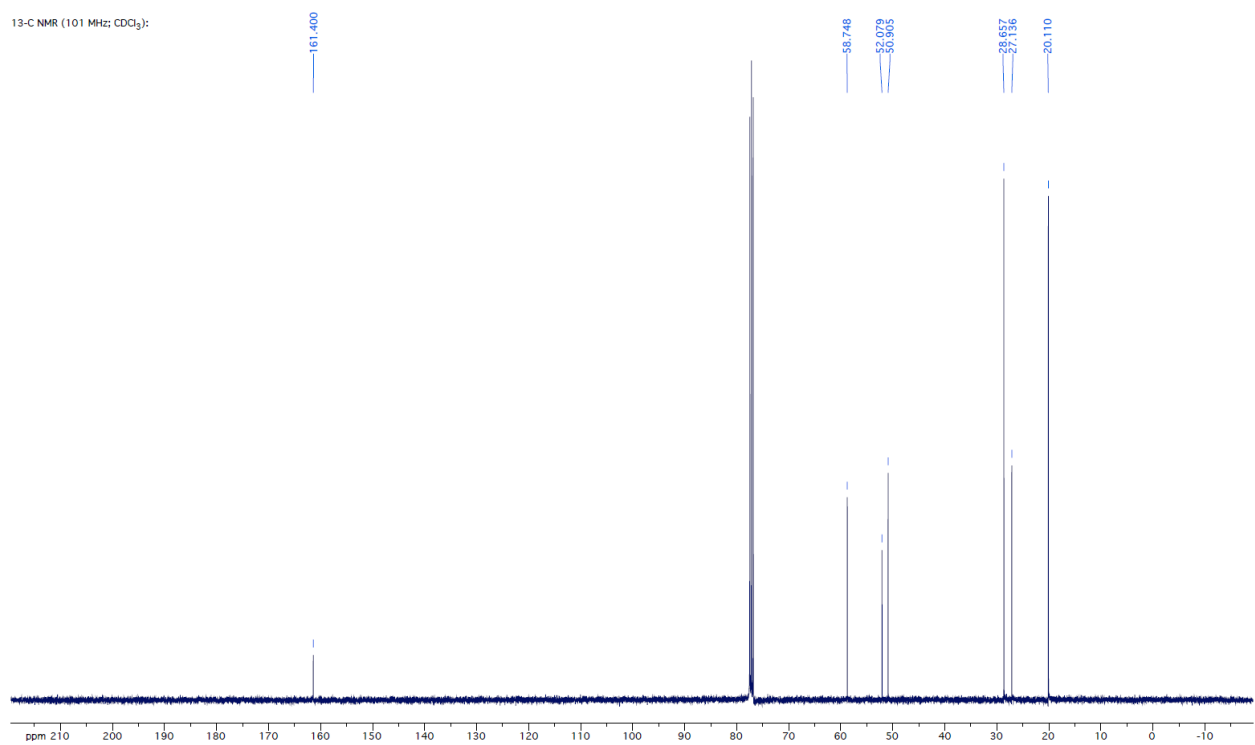

# Supporting Information

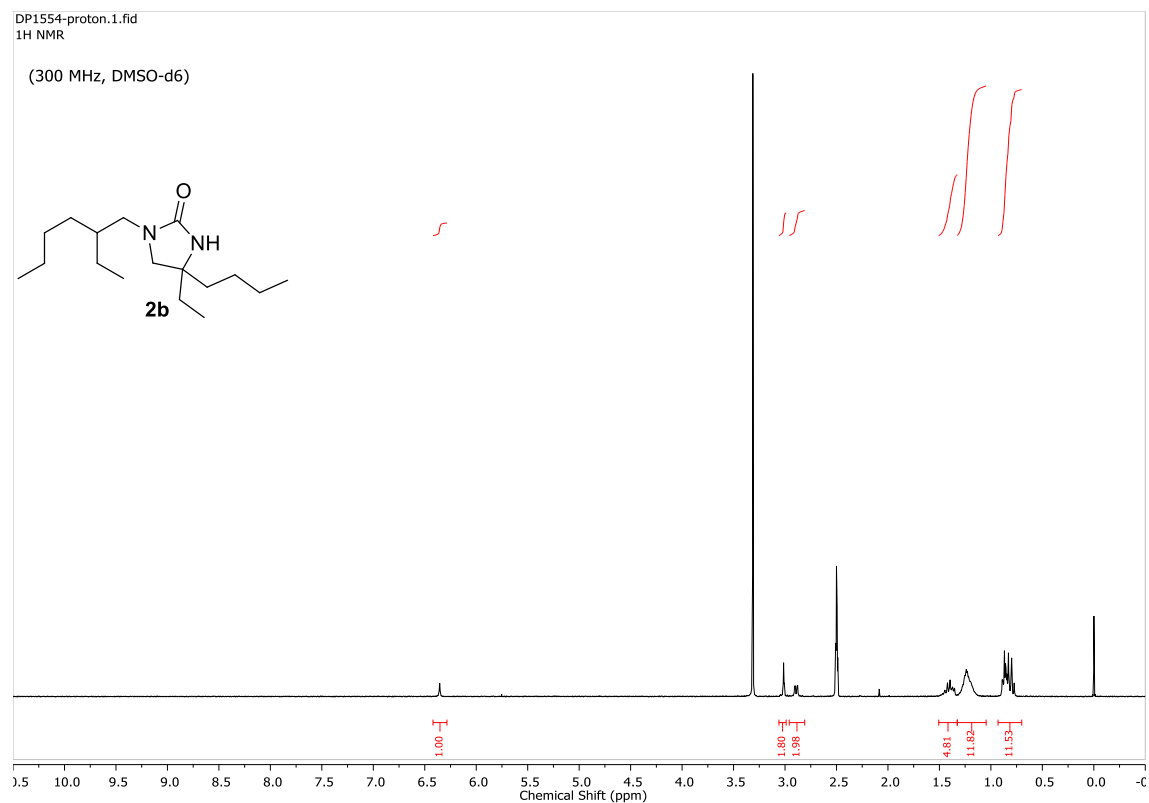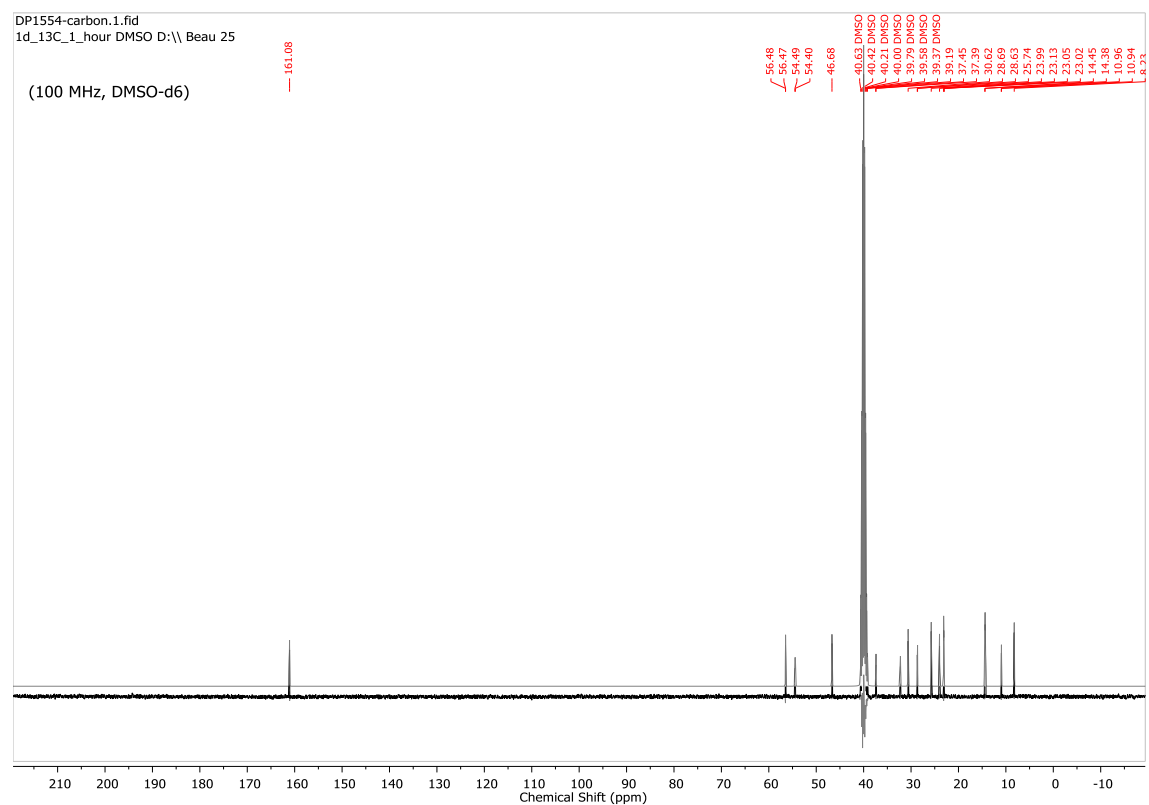



## Supporting Information

<sup>1</sup>H NMR (400 MHz; CDCl<sub>3</sub>):

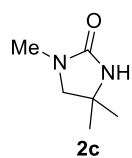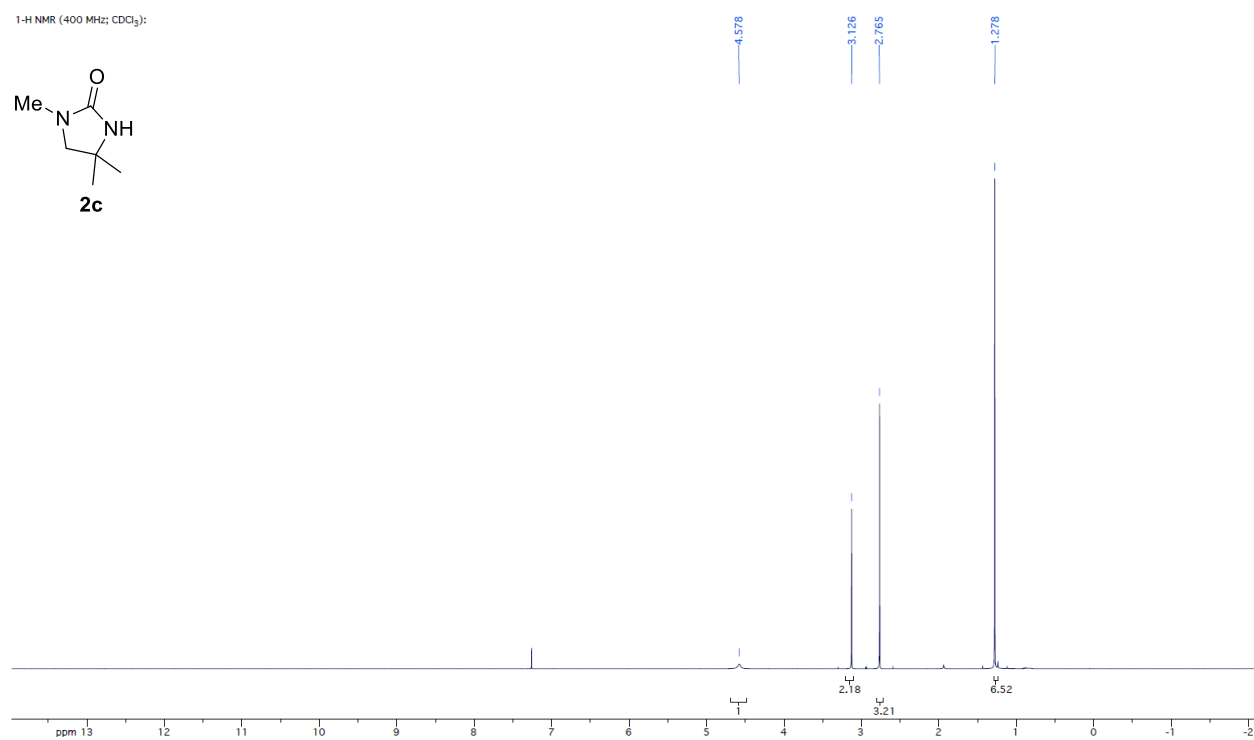

<sup>13</sup>C NMR (101 MHz; CDCl<sub>3</sub>):

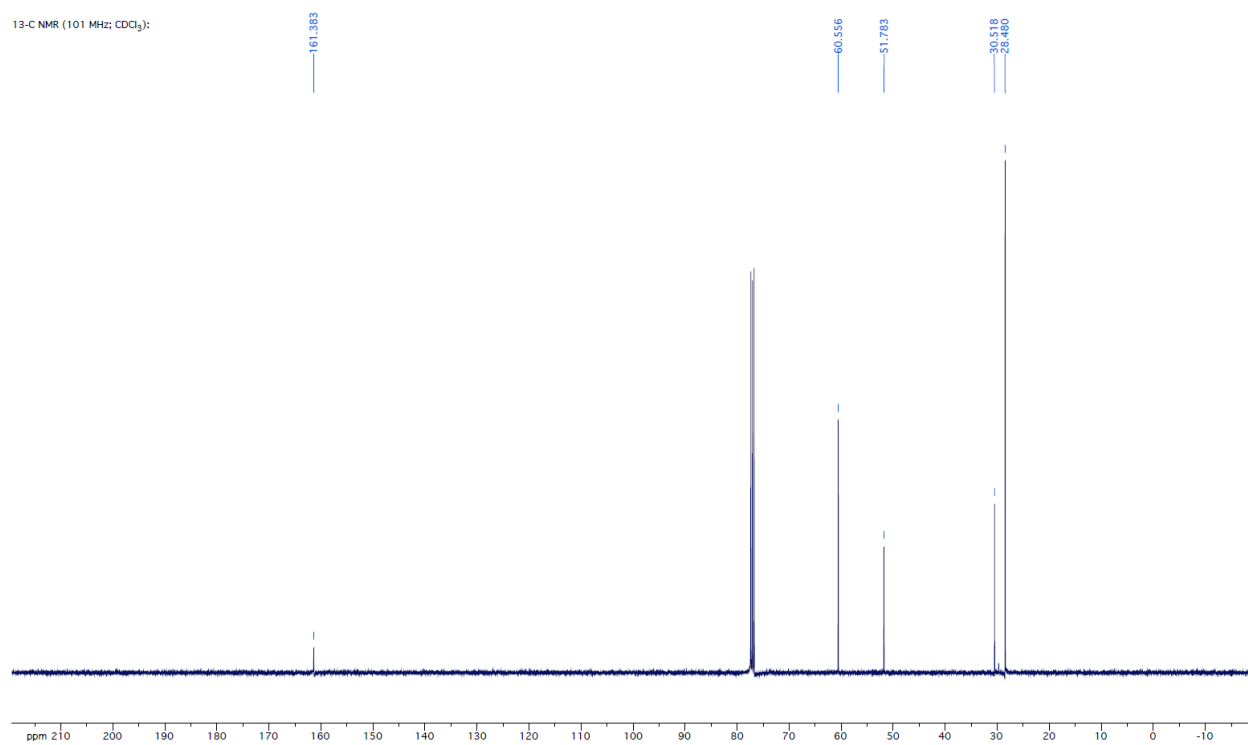

1-H NMR (400 MHz; CDCl<sub>3</sub>):

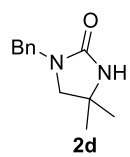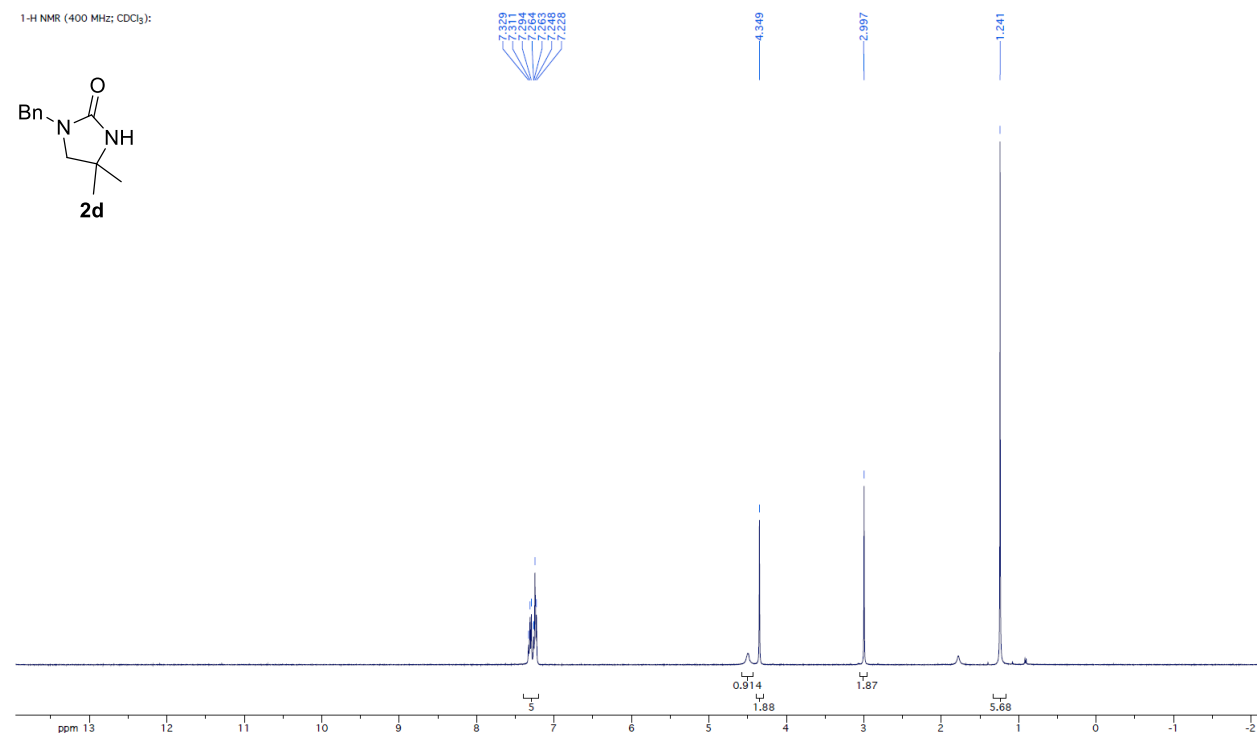

13-C NMR (101 MHz; CDCl<sub>3</sub>):

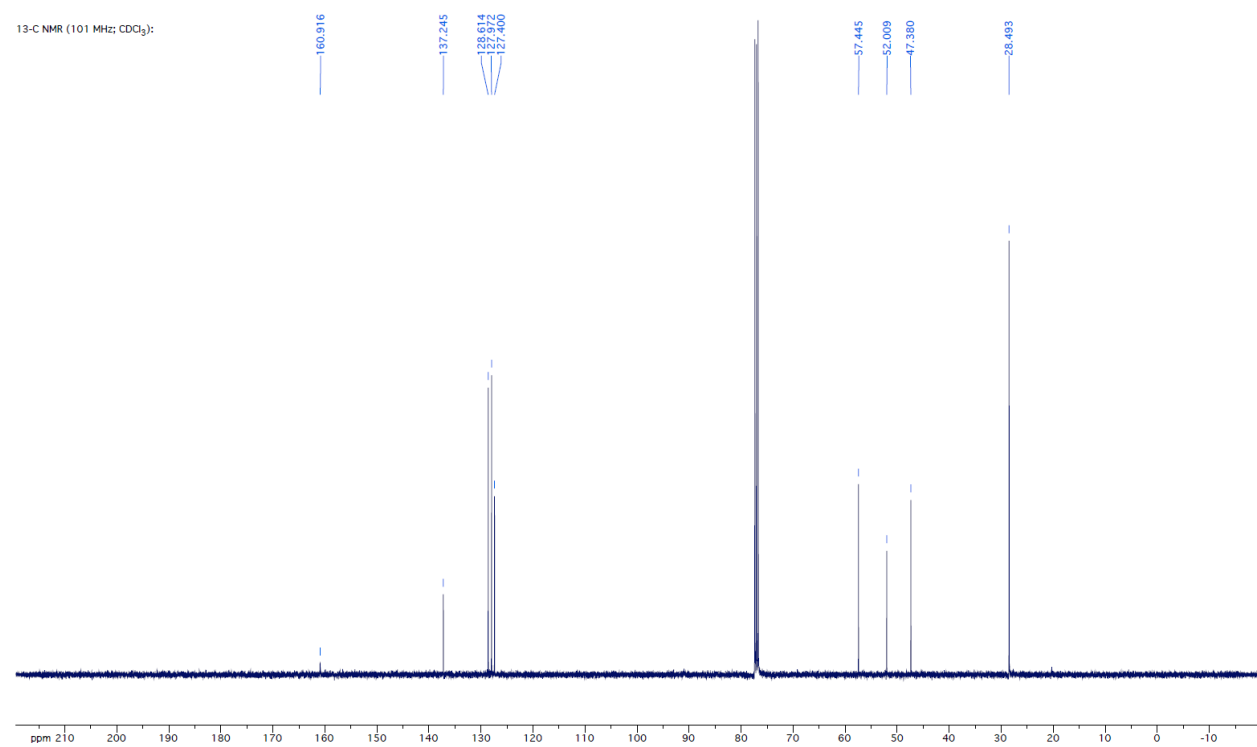

# Supporting Information

<sup>1</sup>H NMR (400 MHz; CDCl<sub>3</sub>):

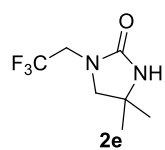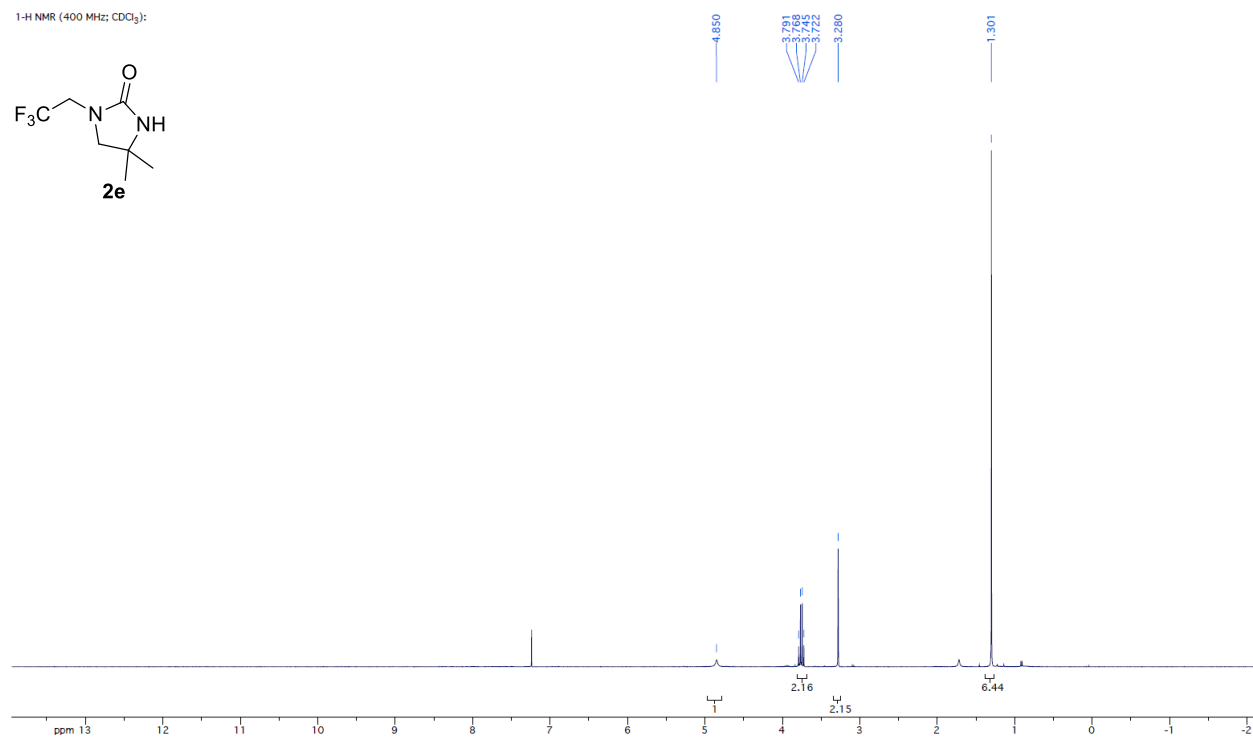

<sup>13</sup>C NMR (101 MHz; CDCl<sub>3</sub>):

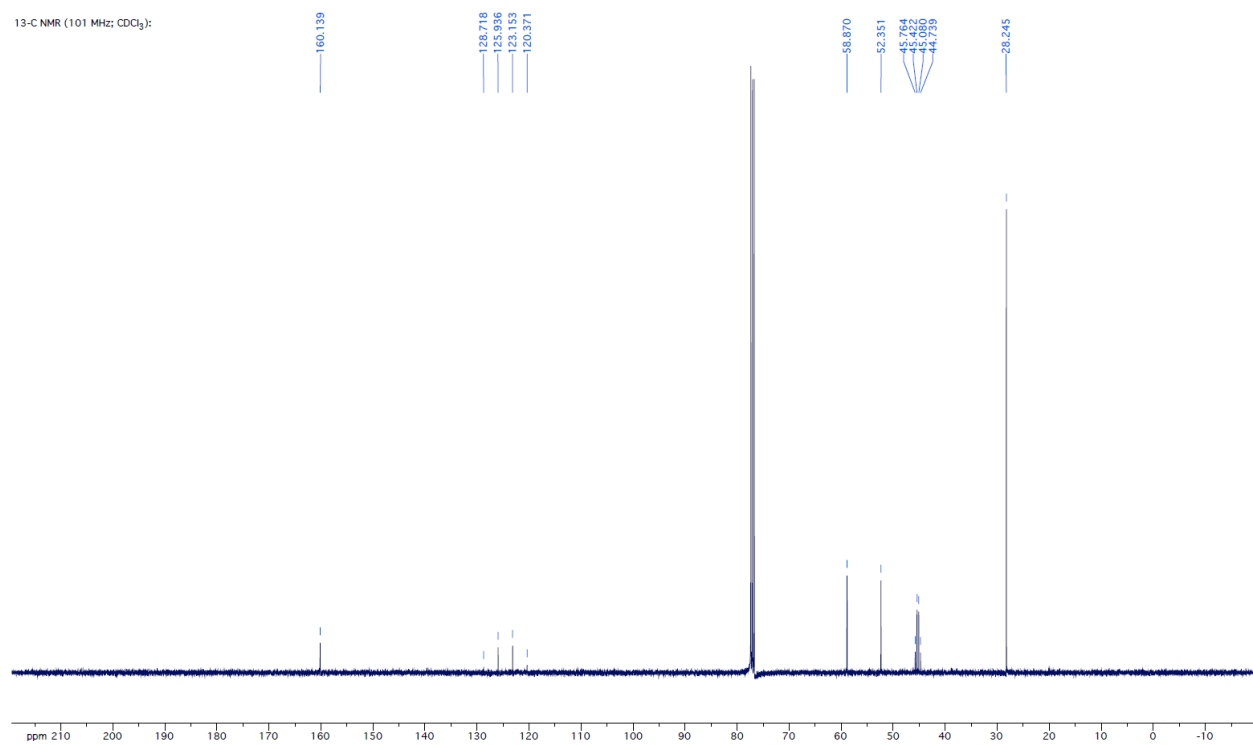

## Supporting Information

<sup>19</sup>F NMR (282 MHz; CDCl<sub>3</sub>):

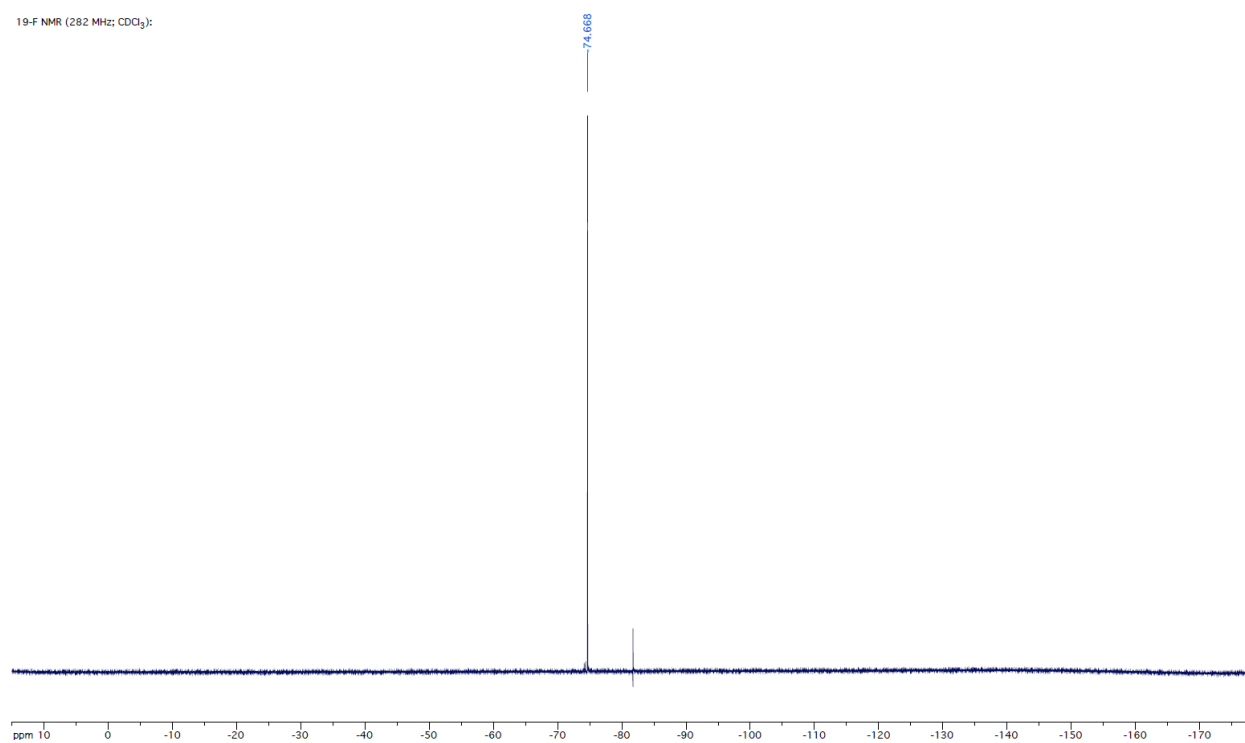

# Supporting Information

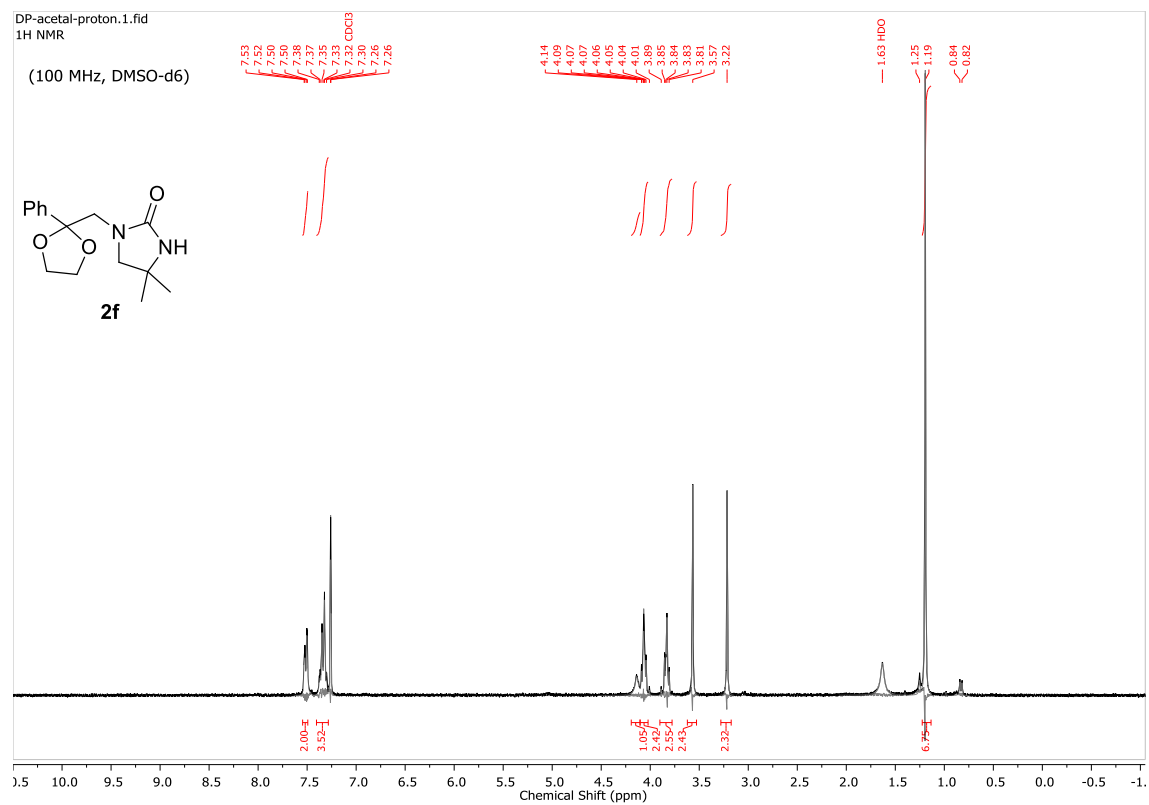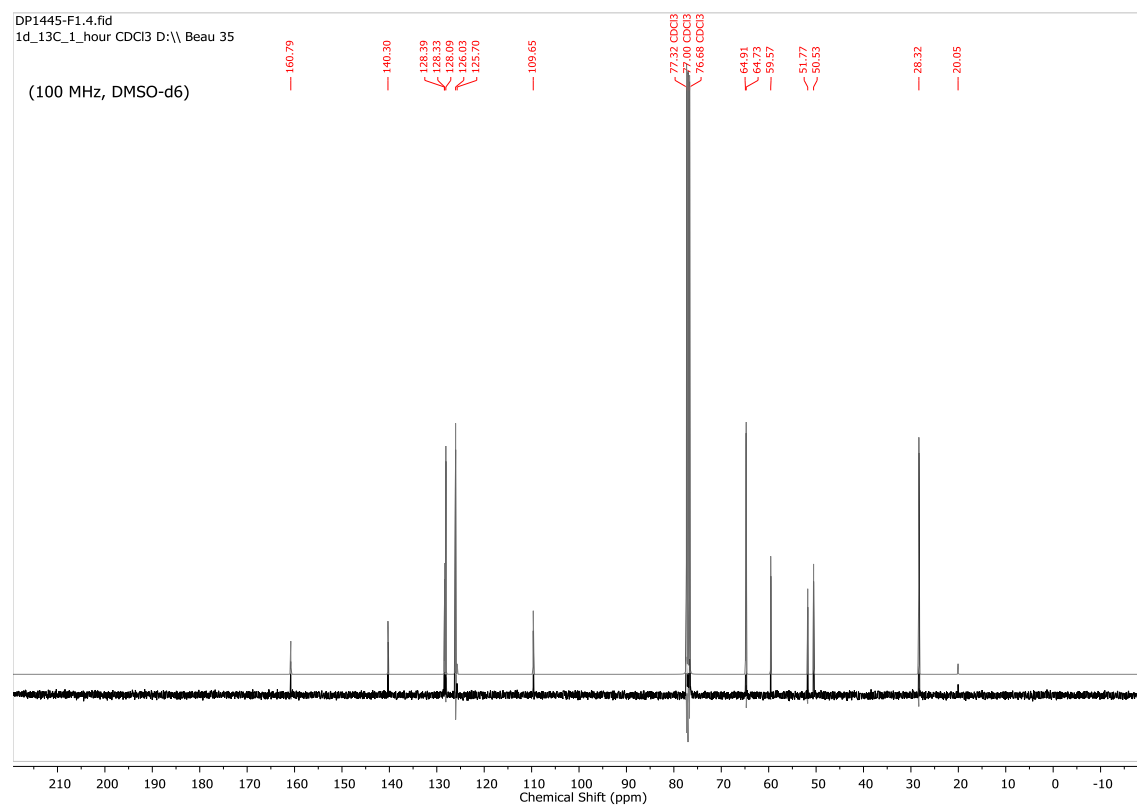

# Supporting Information

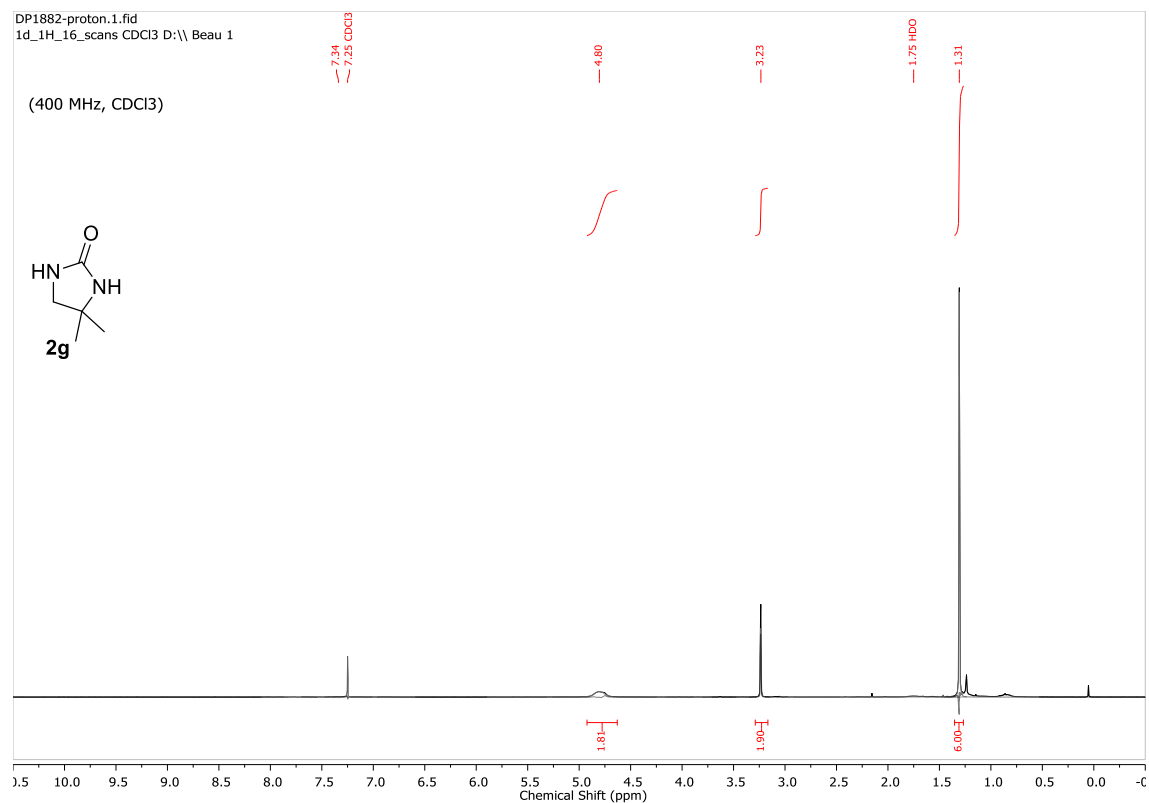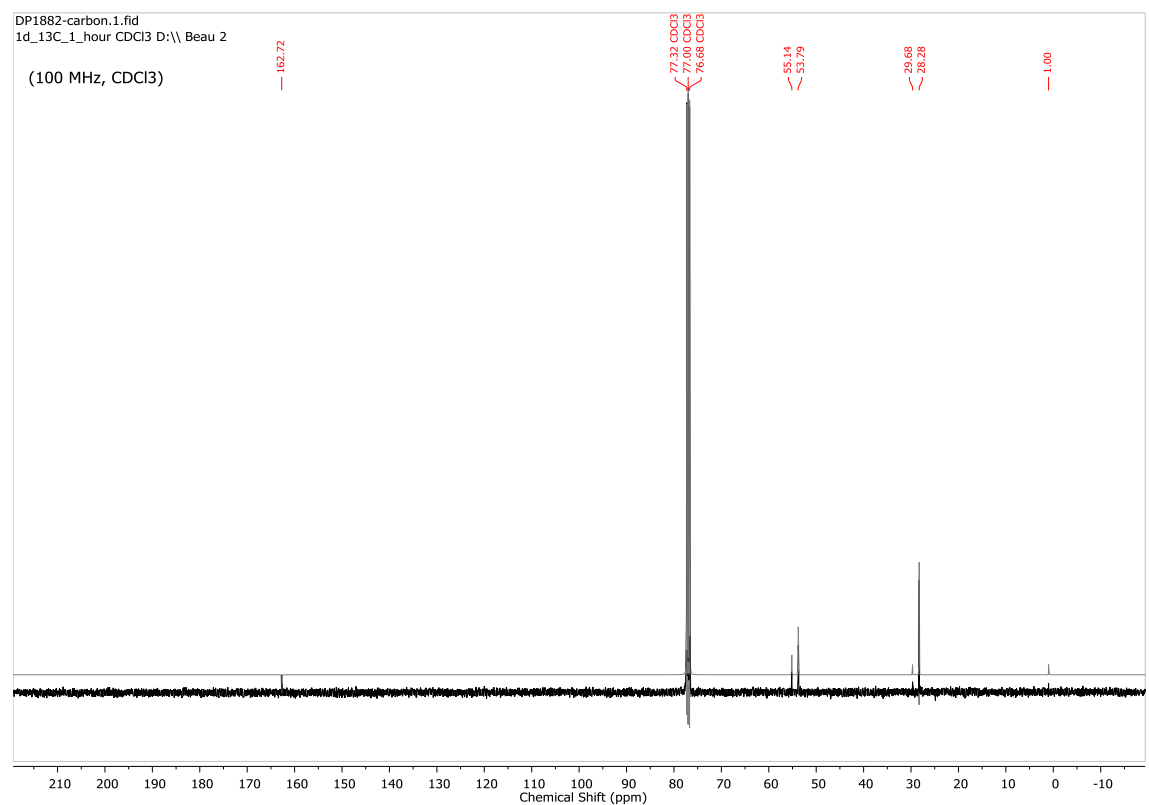

# Supporting Information

<sup>1</sup>H NMR (400 MHz; CDCl<sub>3</sub>):

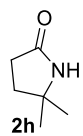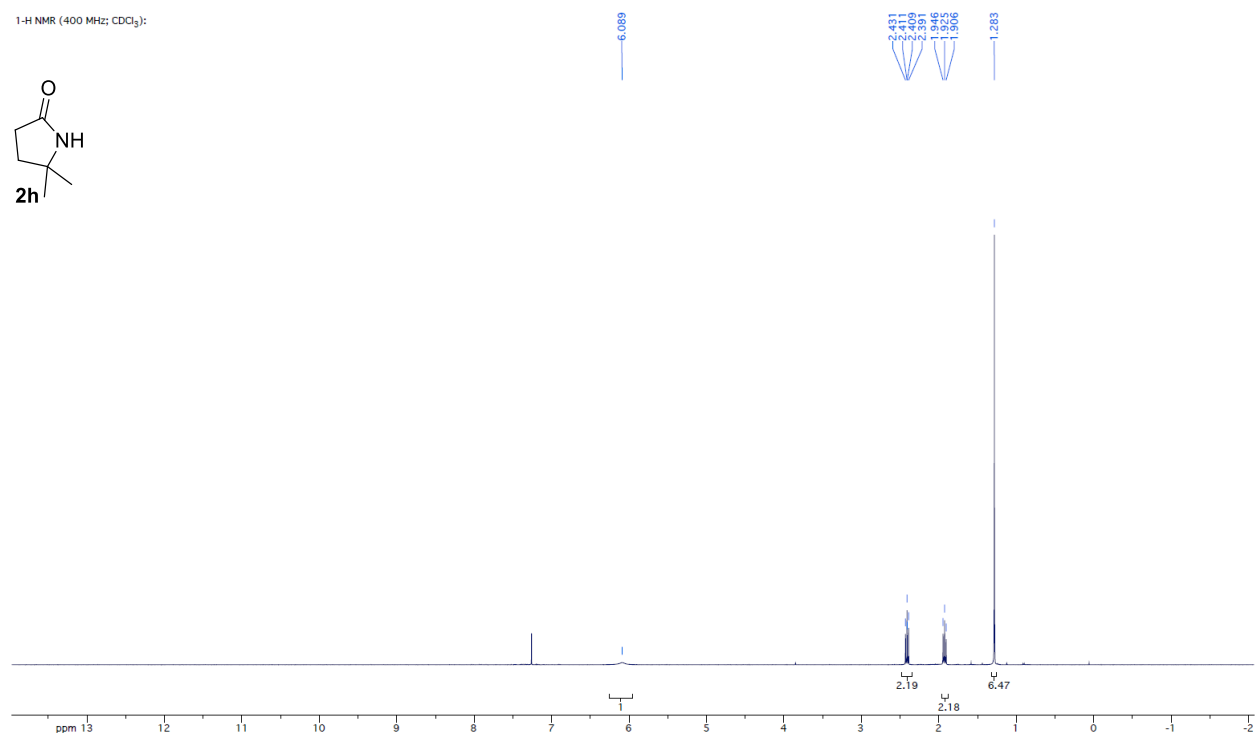

<sup>13</sup>C NMR (101 MHz; CDCl<sub>3</sub>):

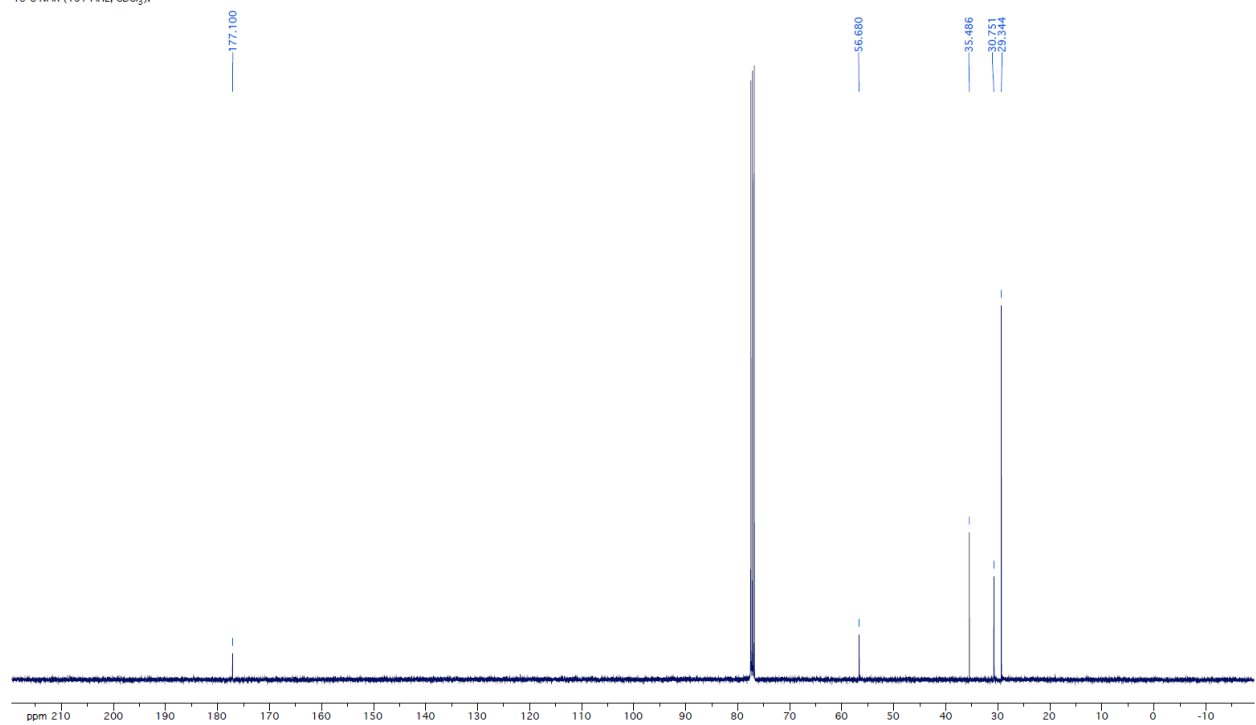

# Supporting Information

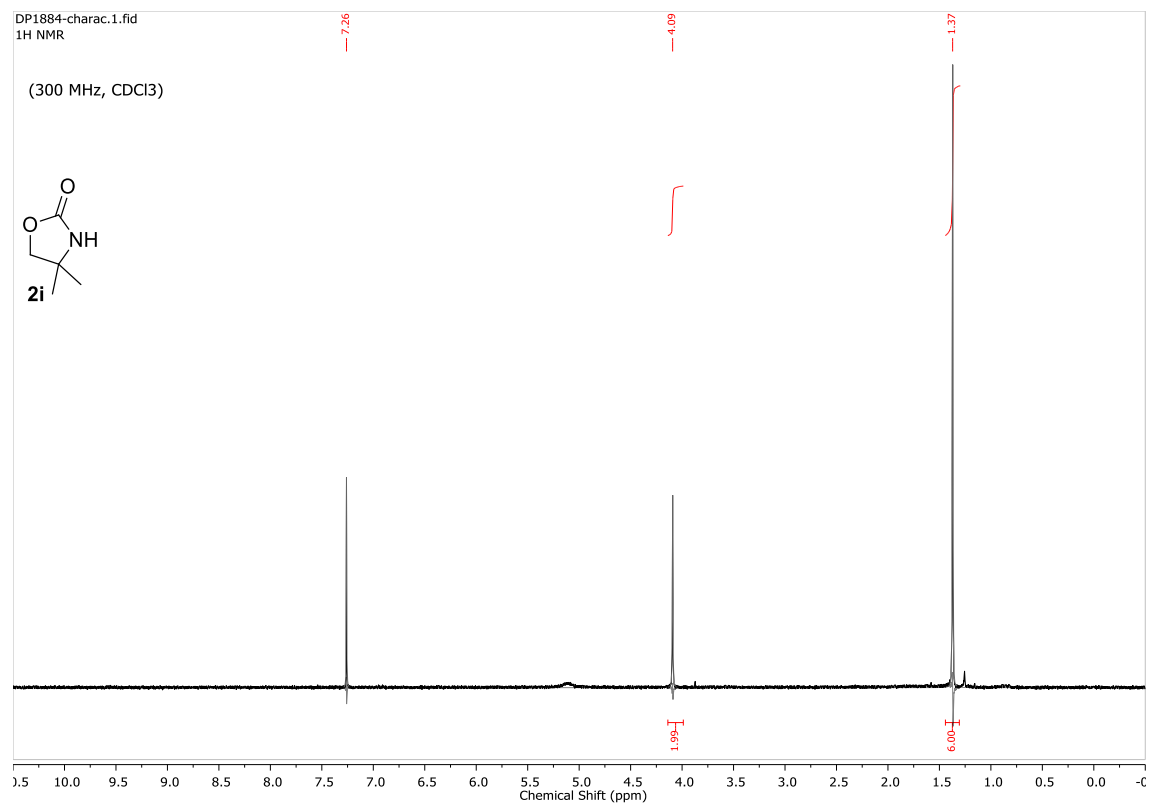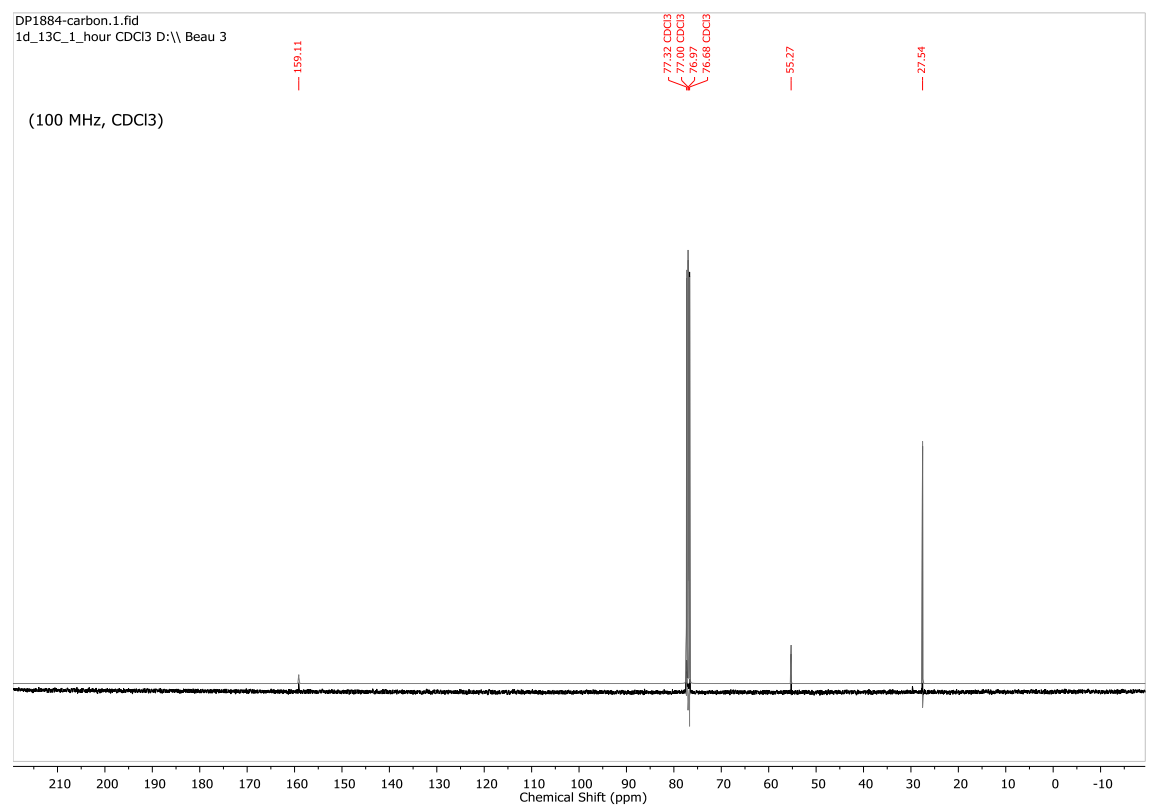



# Supporting Information

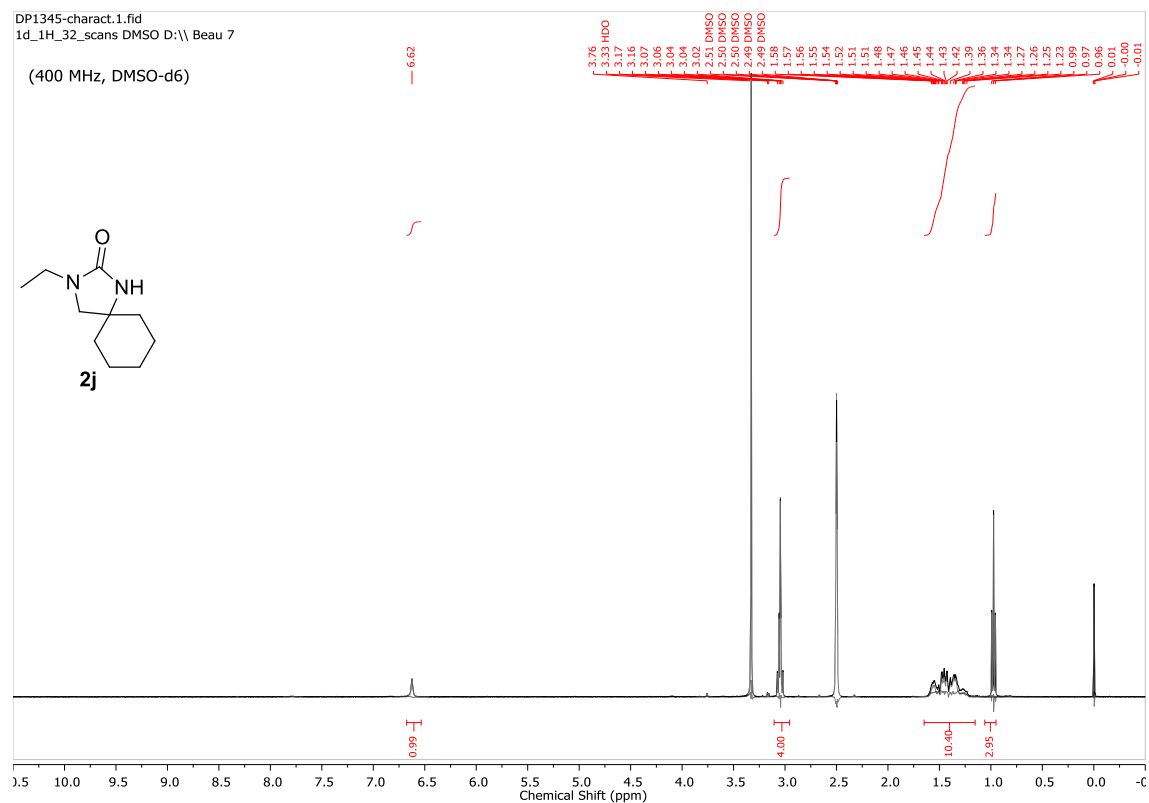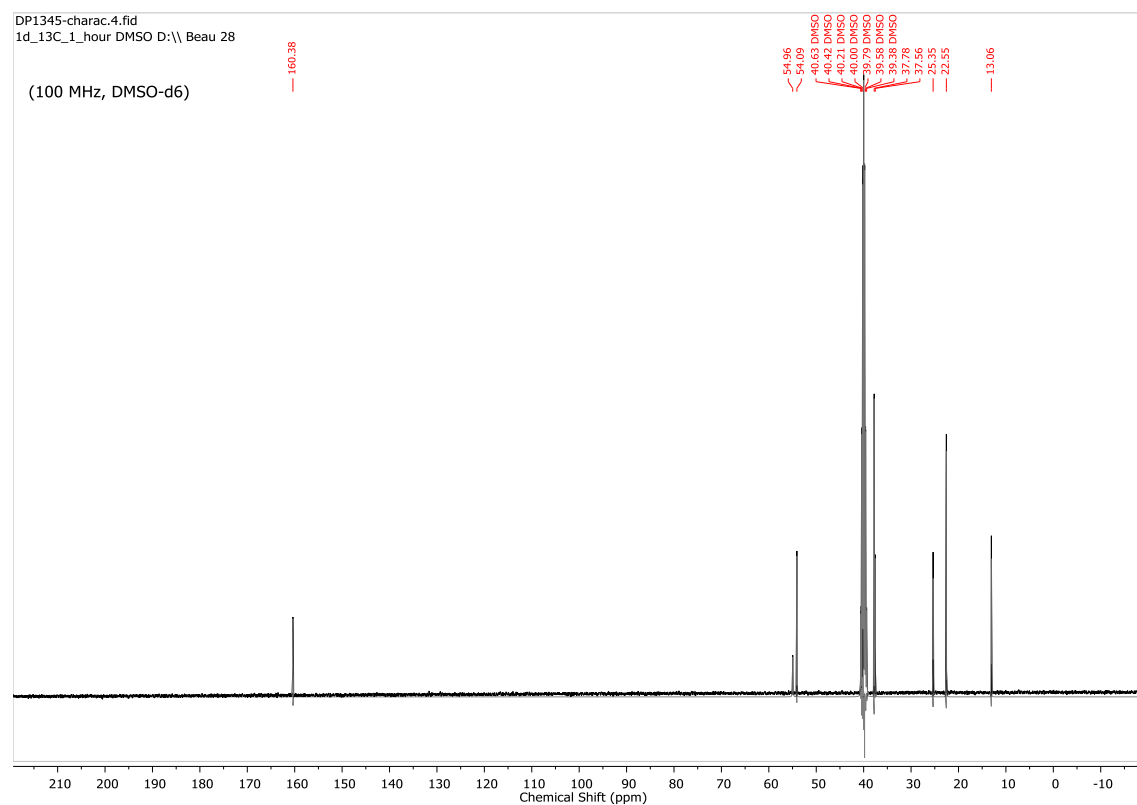

# Supporting Information

<sup>1</sup>H NMR (400 MHz; CDCl<sub>3</sub>):

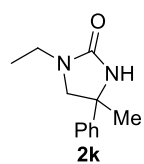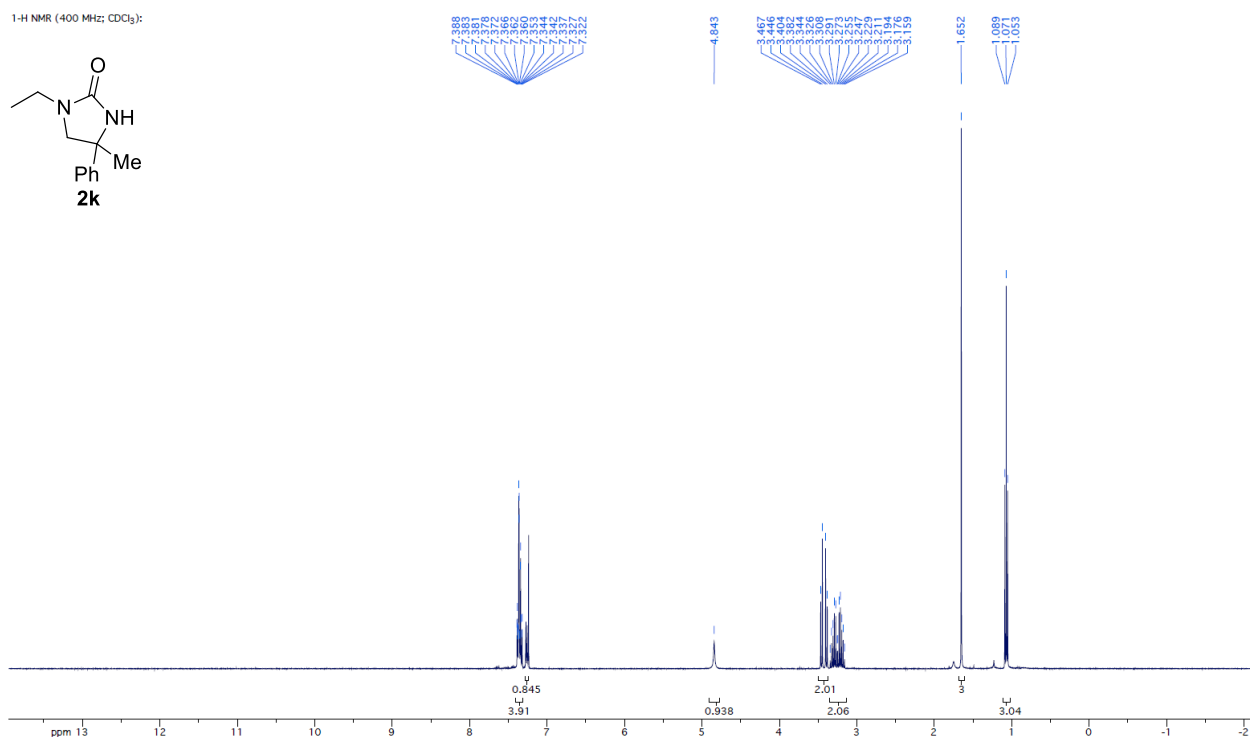

<sup>13</sup>C NMR (101 MHz; CDCl<sub>3</sub>):

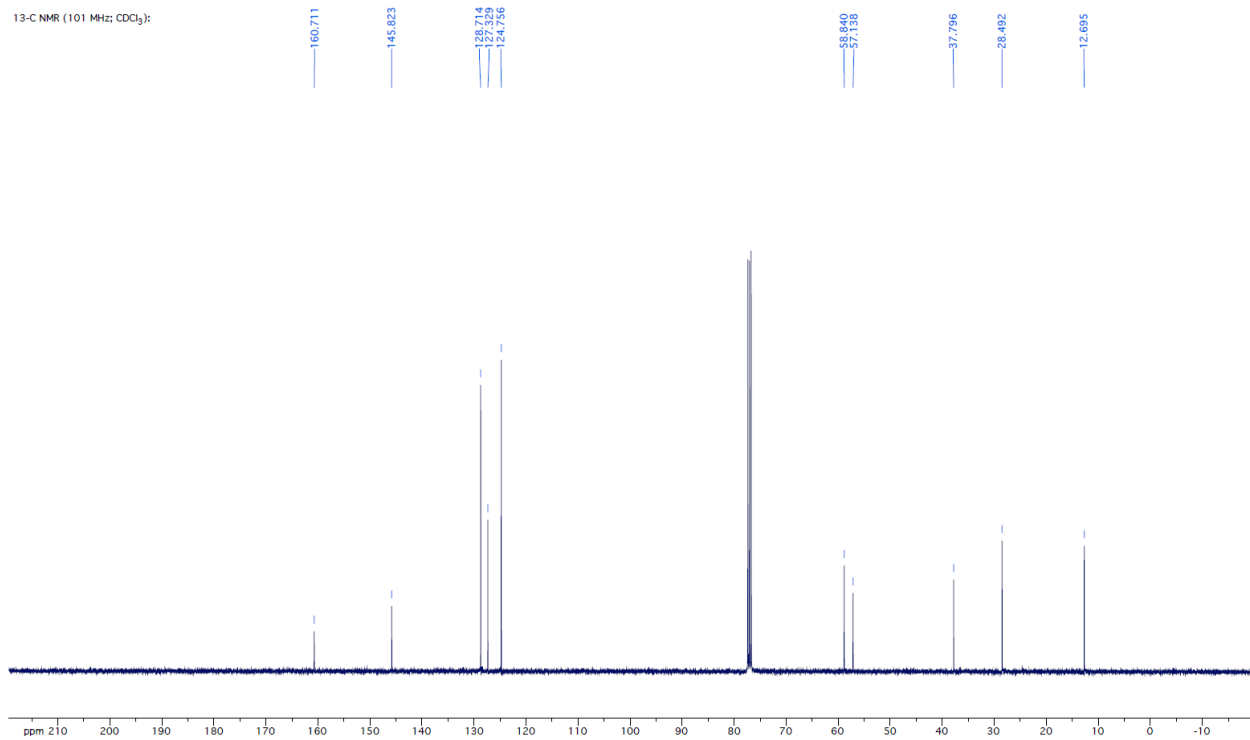

# Supporting Information

<sup>1</sup>H NMR (300 MHz; CDCl<sub>3</sub>):

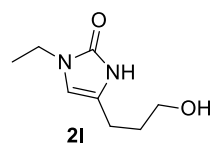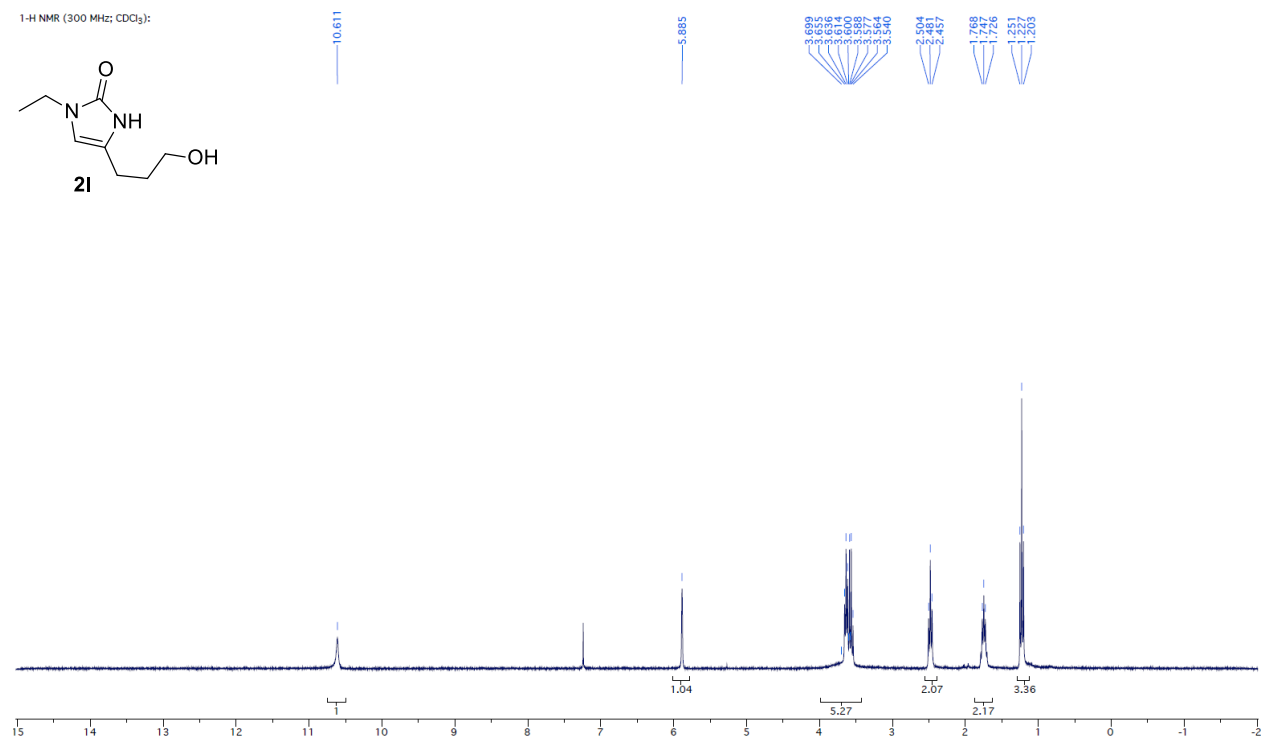

<sup>13</sup>C NMR (75 MHz; CDCl<sub>3</sub>):

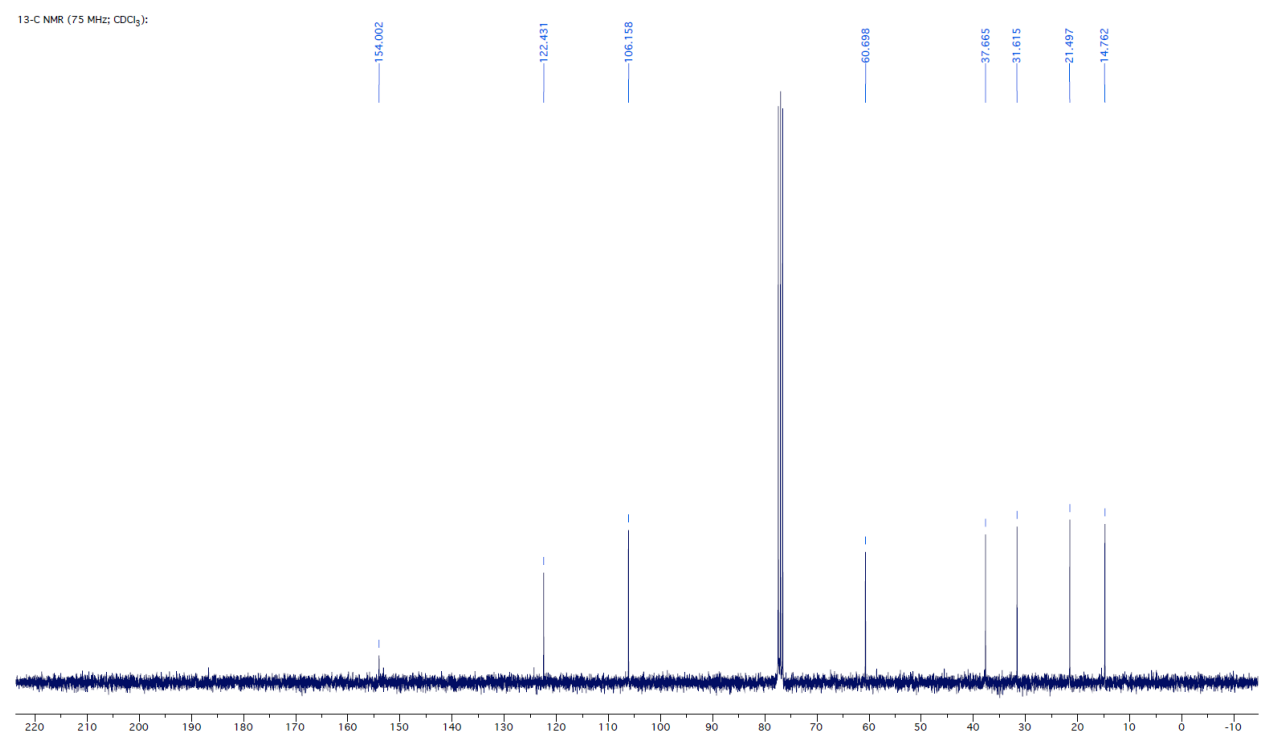

# Supporting Information

<sup>1</sup>H NMR (400 MHz; CDCl<sub>3</sub>):

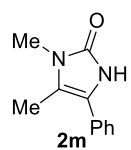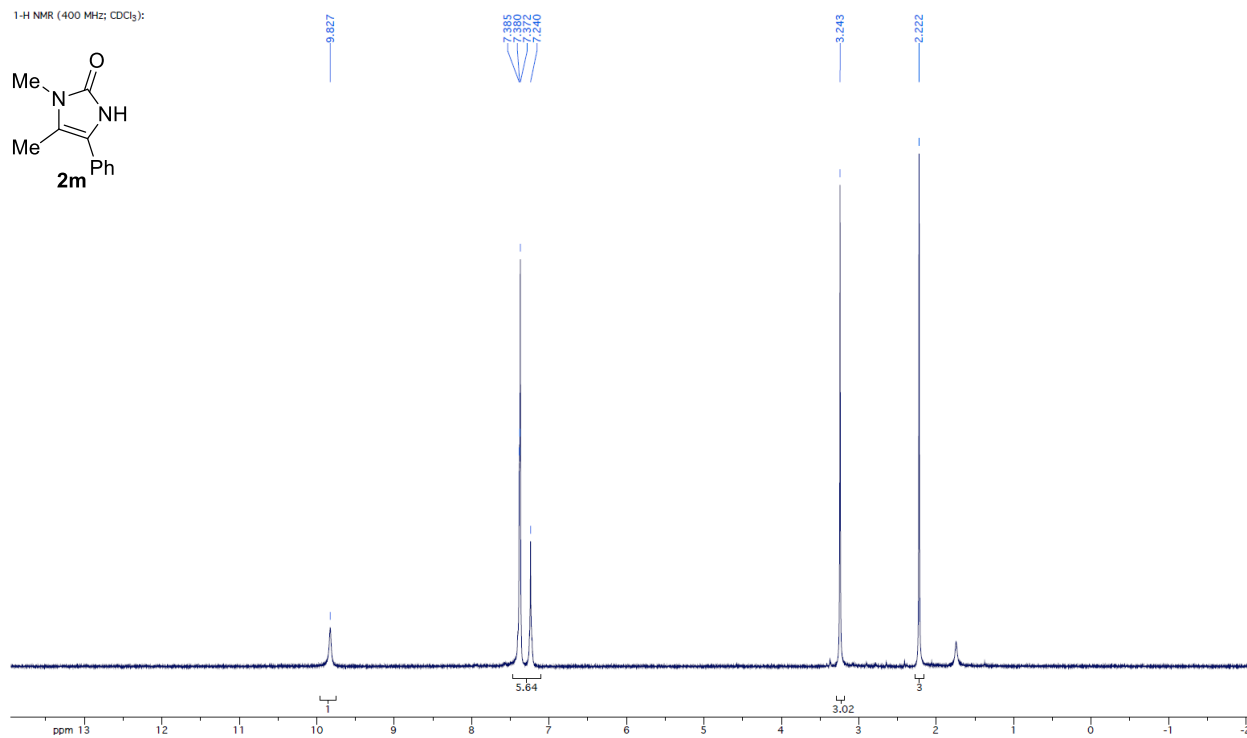

<sup>13</sup>C NMR (101 MHz; CDCl<sub>3</sub>):

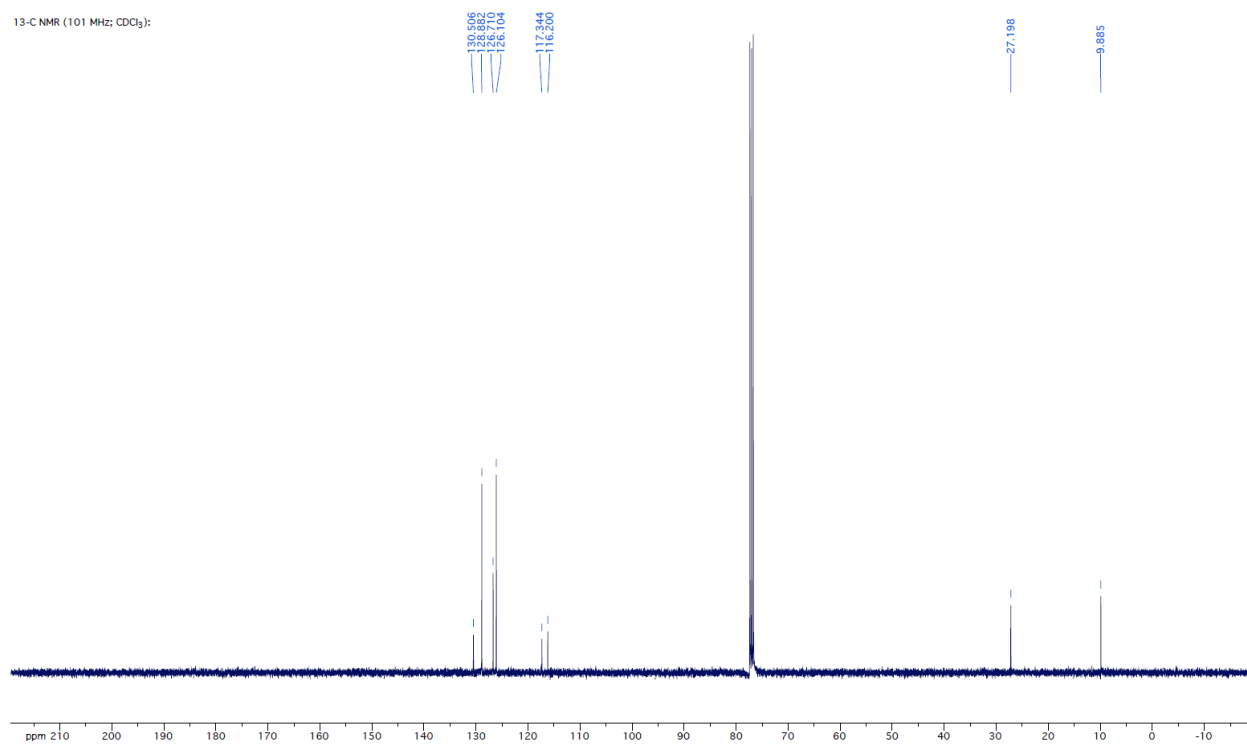

<sup>1</sup>H NMR (600 MHz; DMSO):

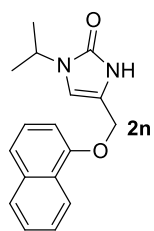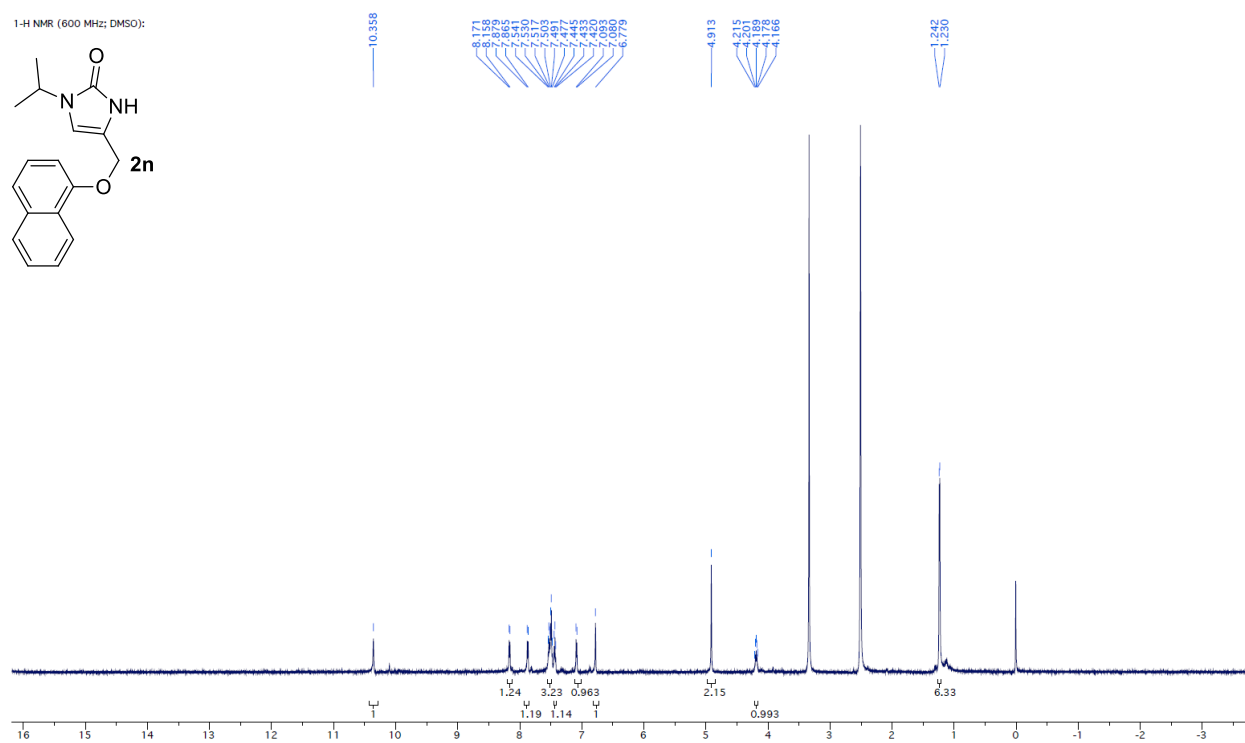

<sup>13</sup>C NMR (151 MHz; DMSO):

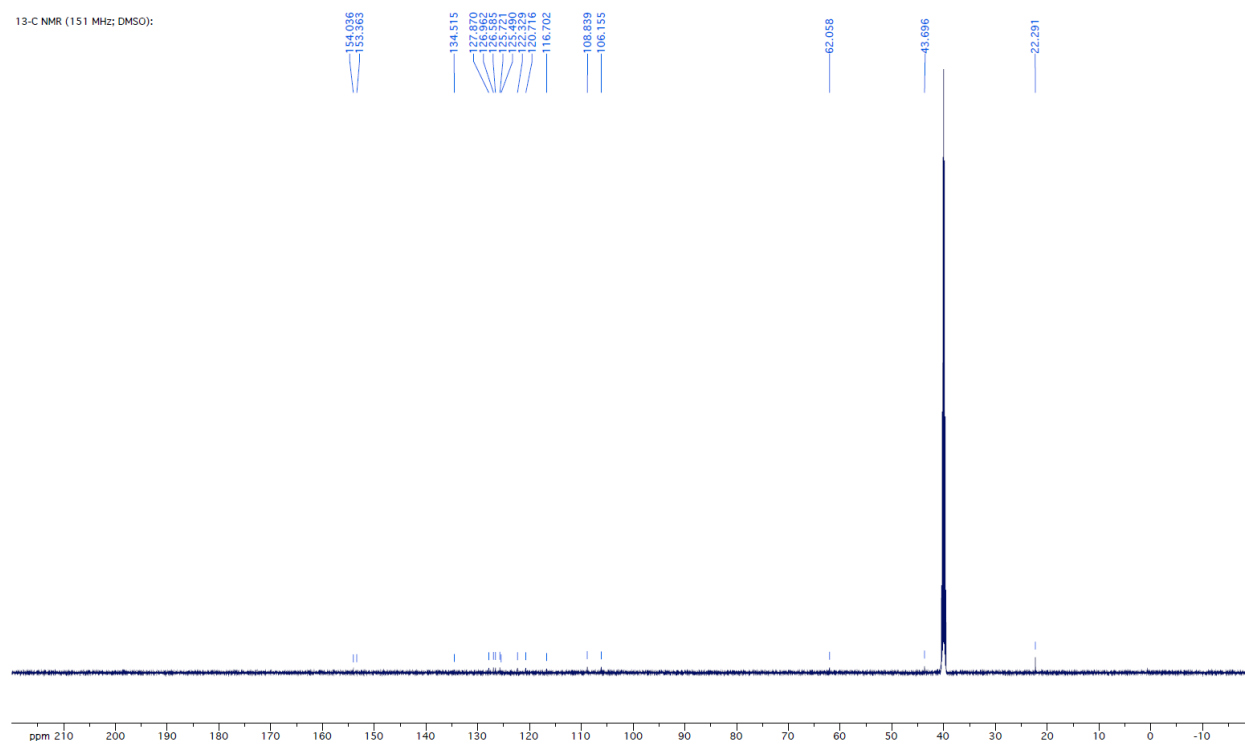

## Supporting Information

<sup>1</sup>H NMR (400 MHz; CDCl<sub>3</sub>):

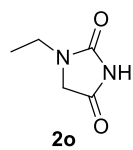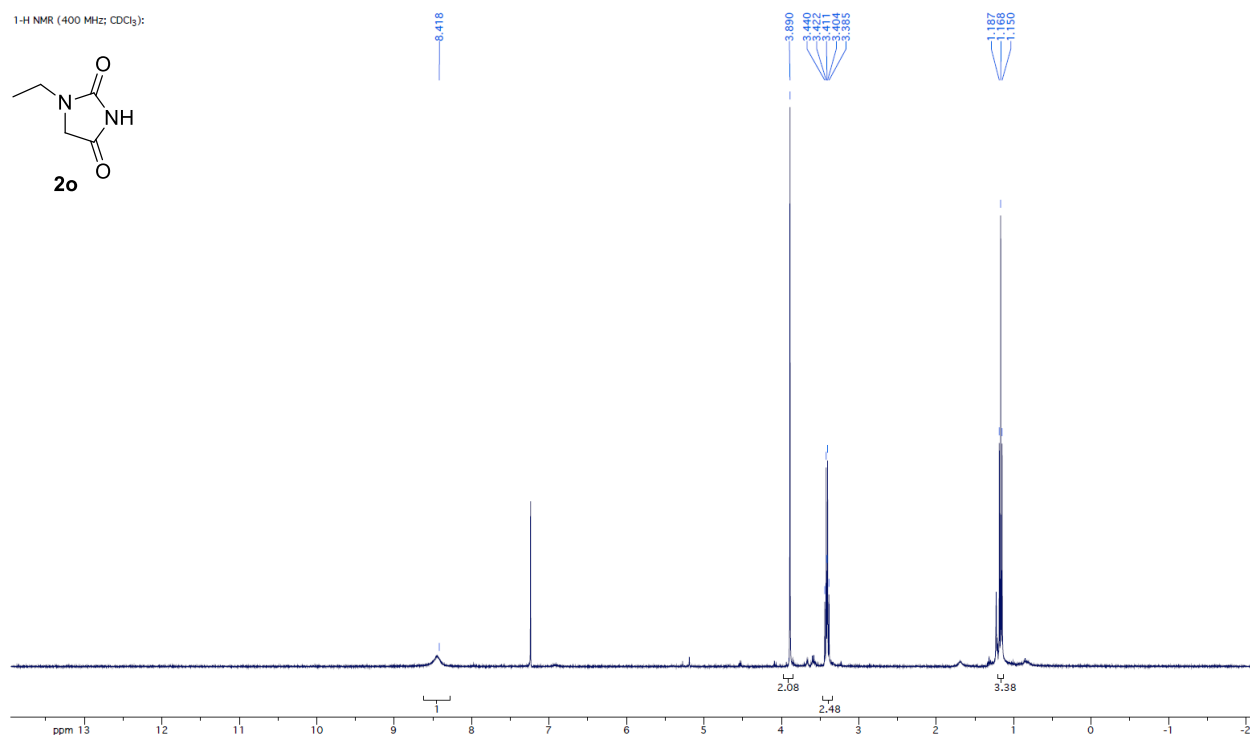

<sup>13</sup>C NMR (101 MHz; CDCl<sub>3</sub>):

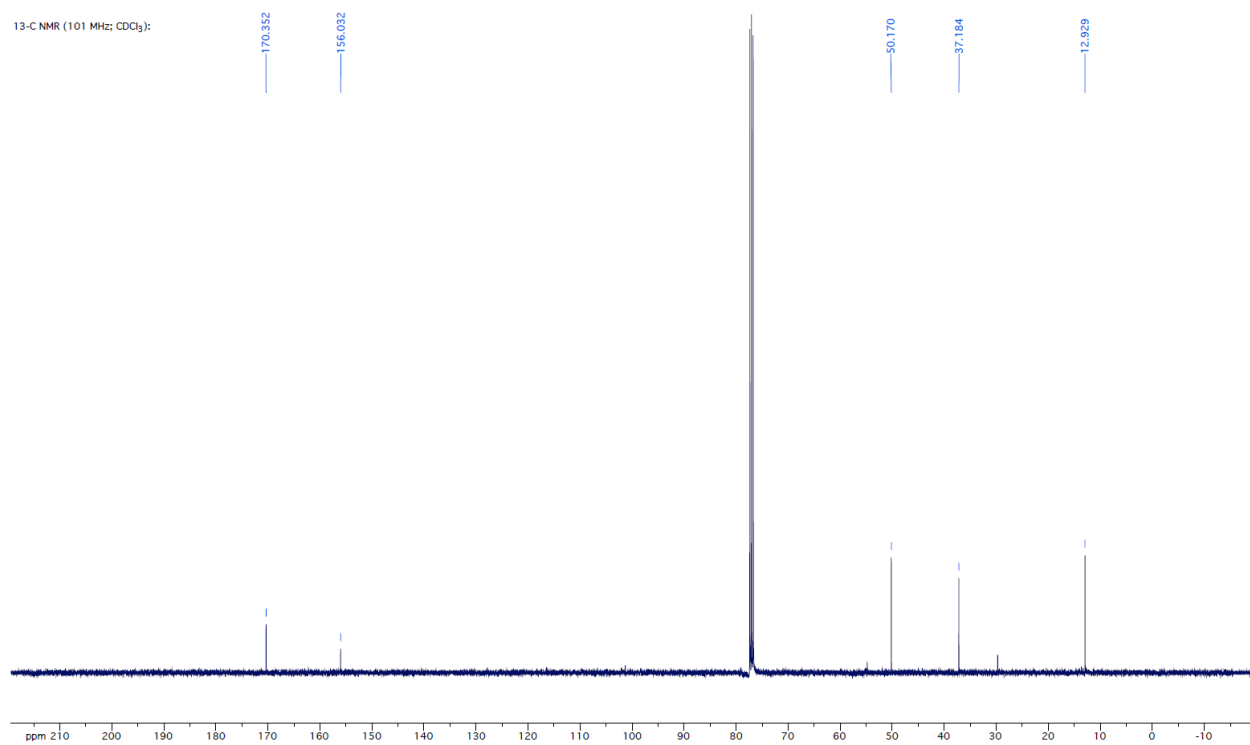

# Supporting Information

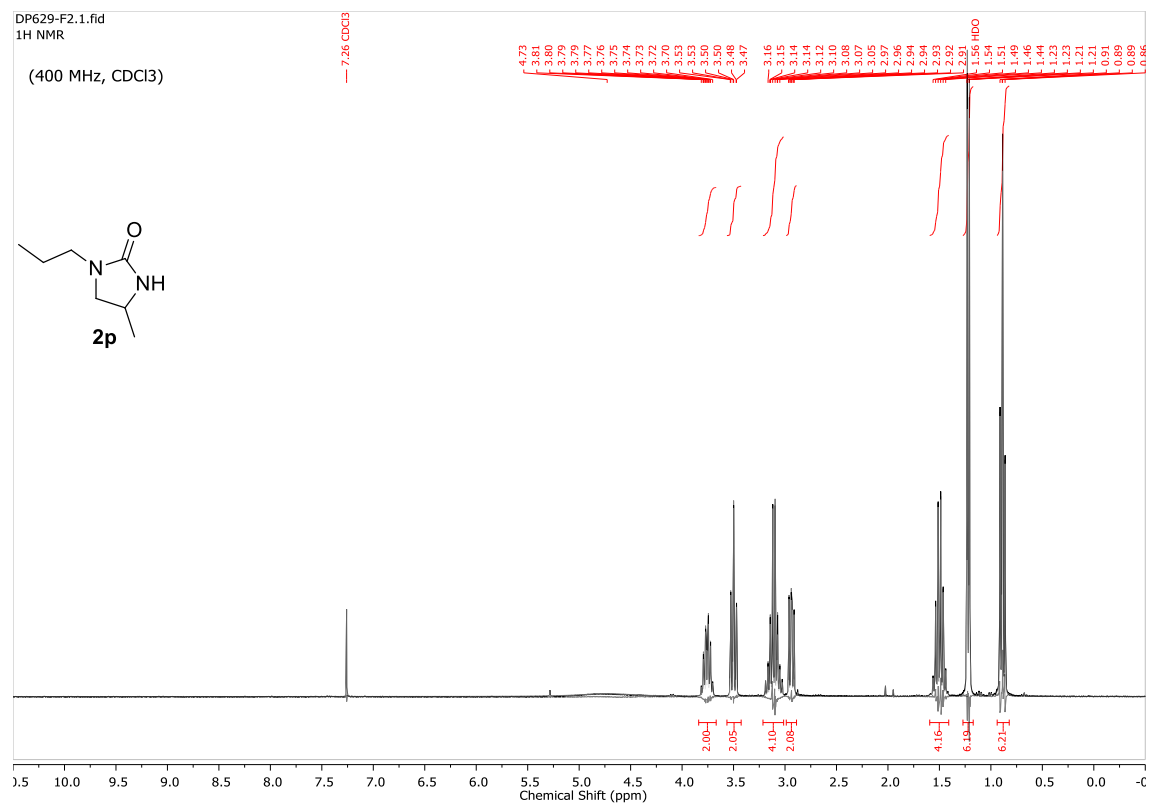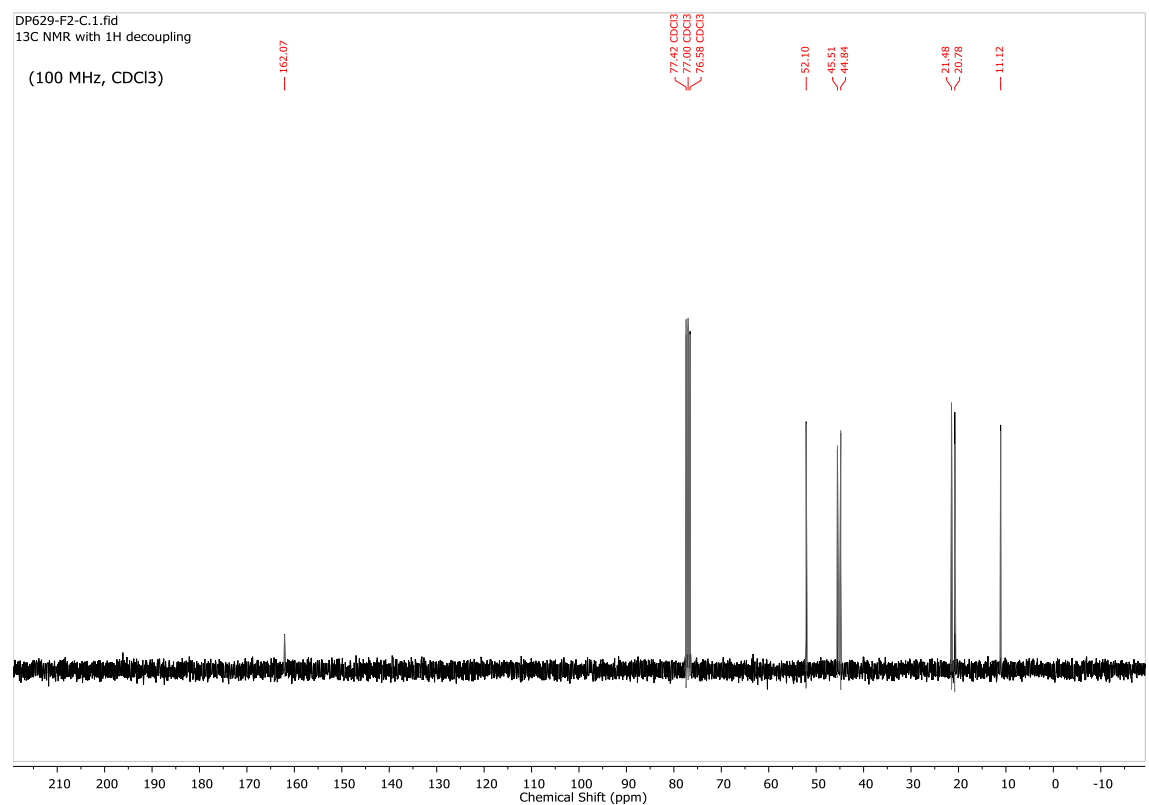

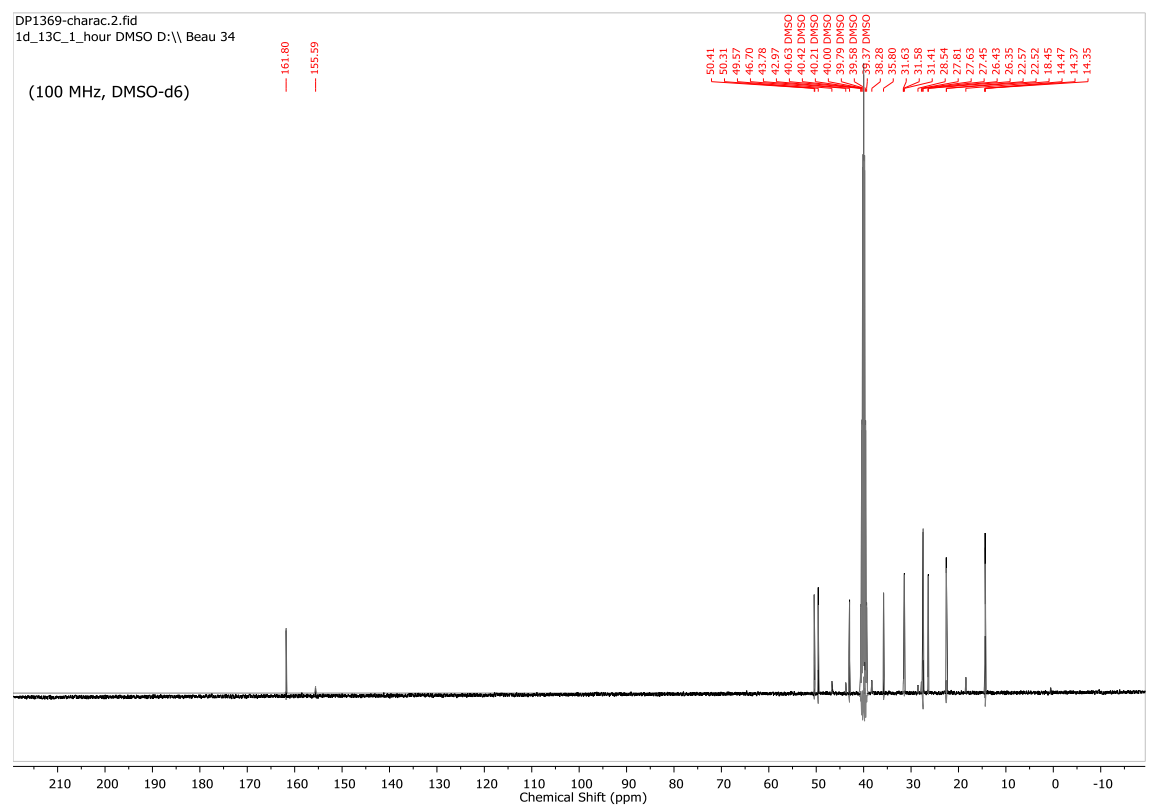



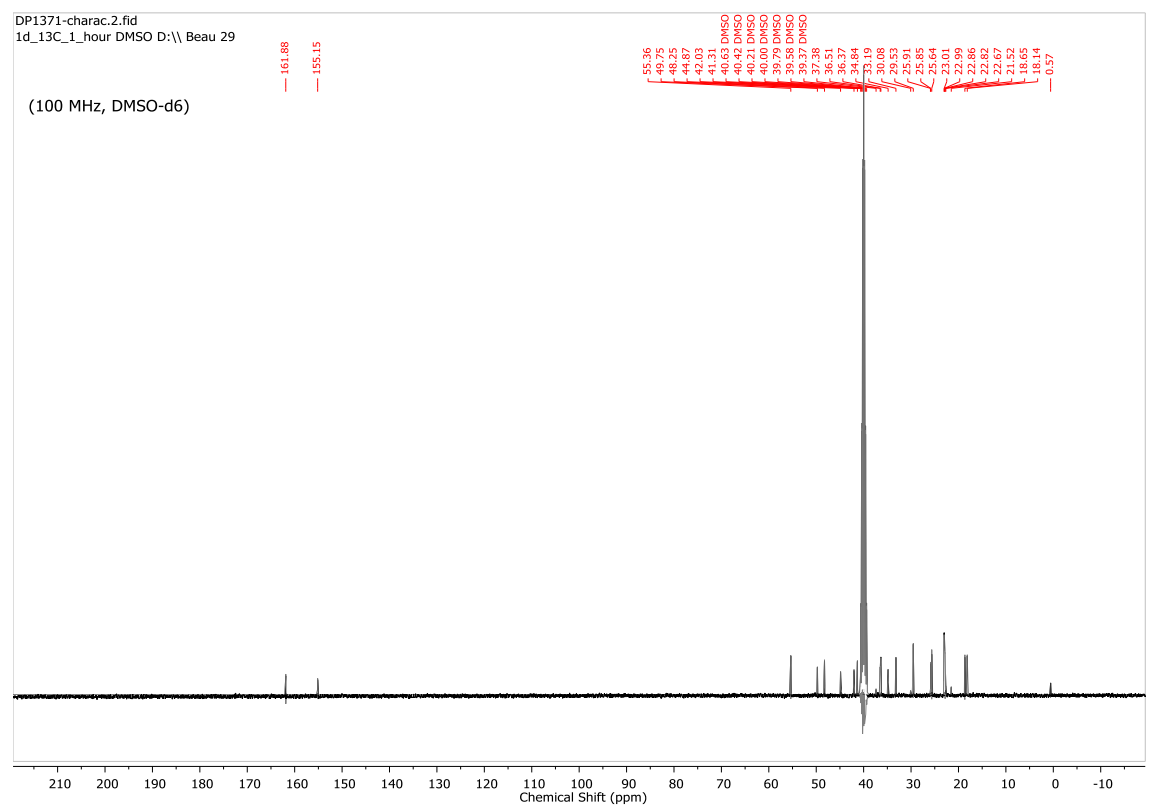

1-H NMR (400 MHz; CDCl<sub>3</sub>):

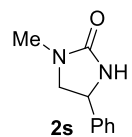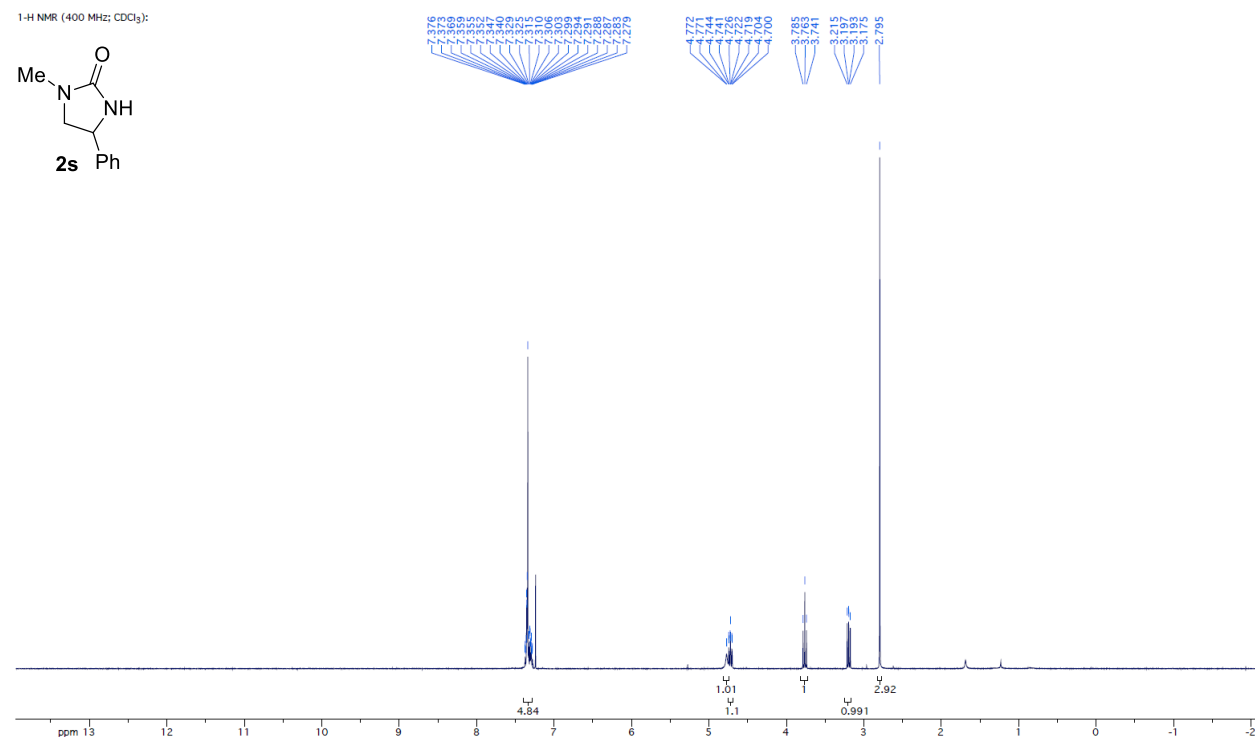

13-C NMR (101 MHz; CDCl<sub>3</sub>):

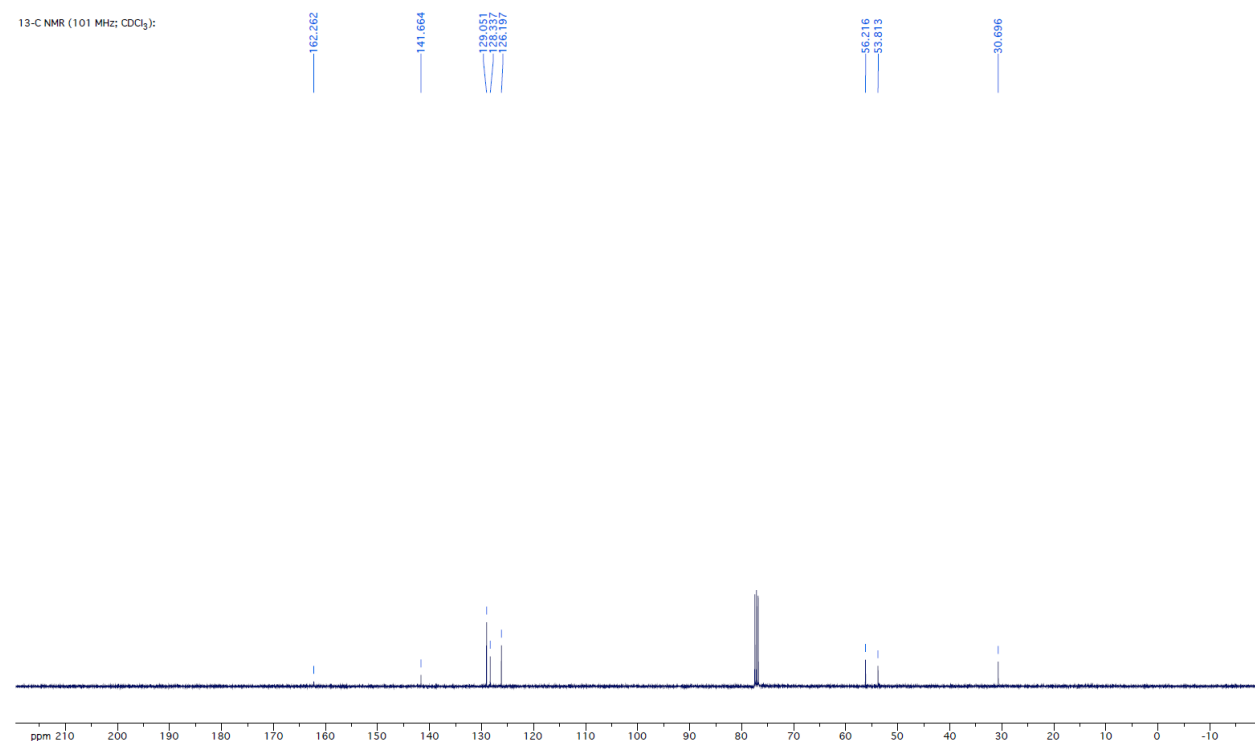

# Supporting Information

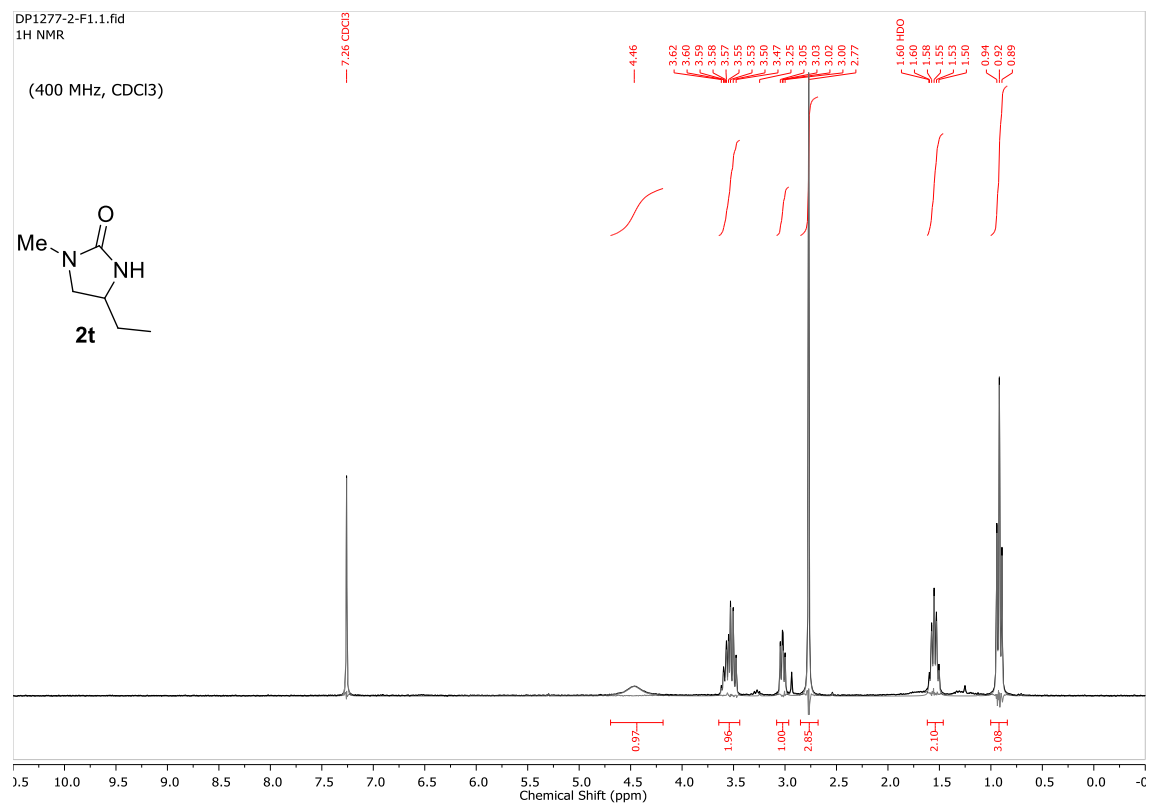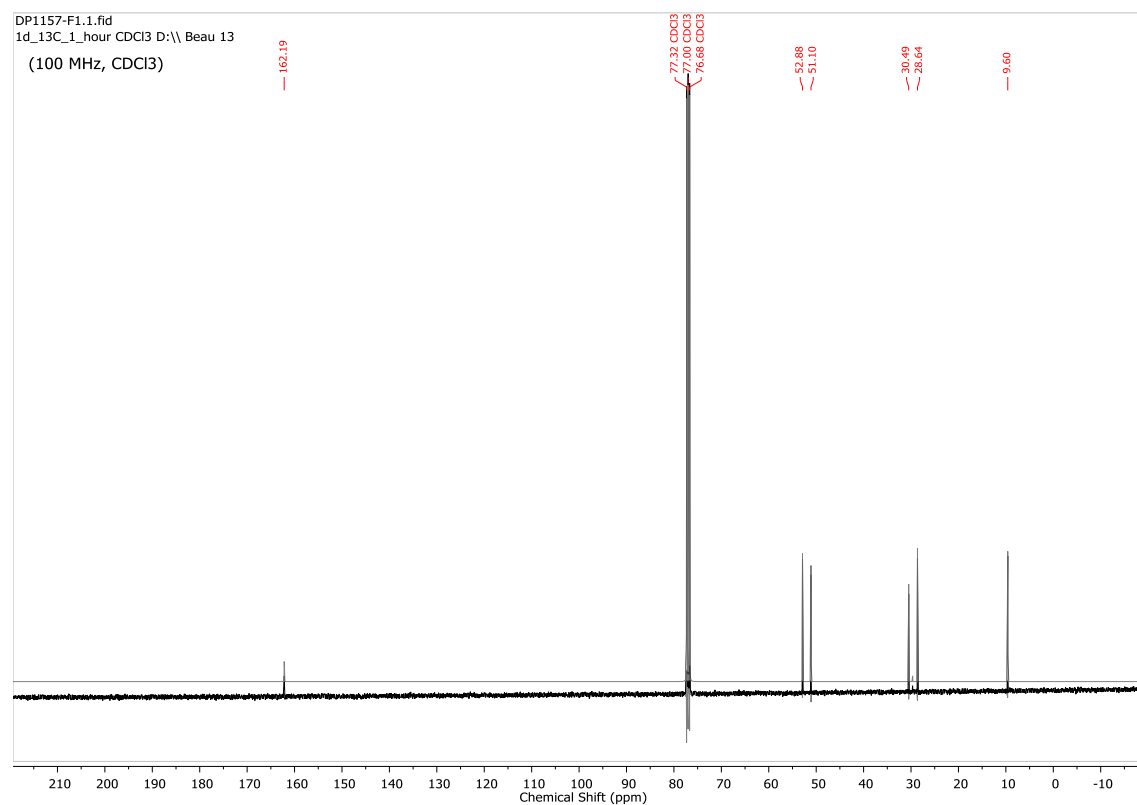

# Supporting Information

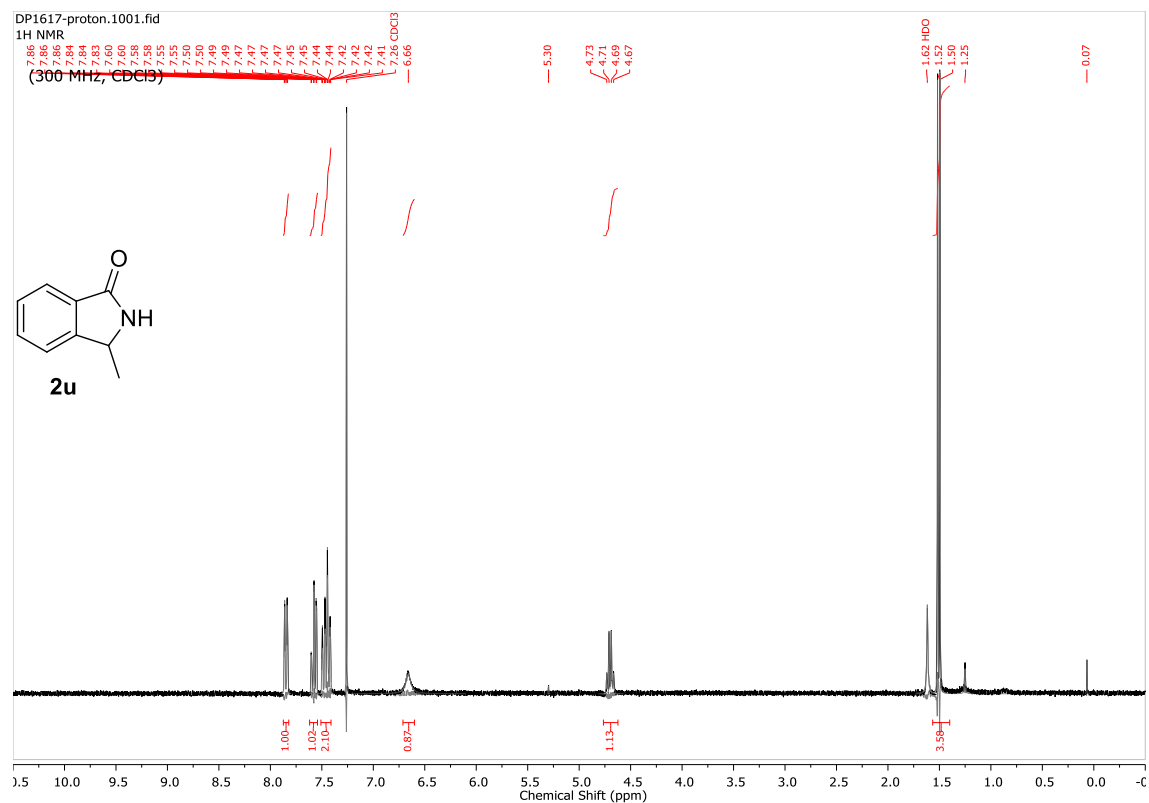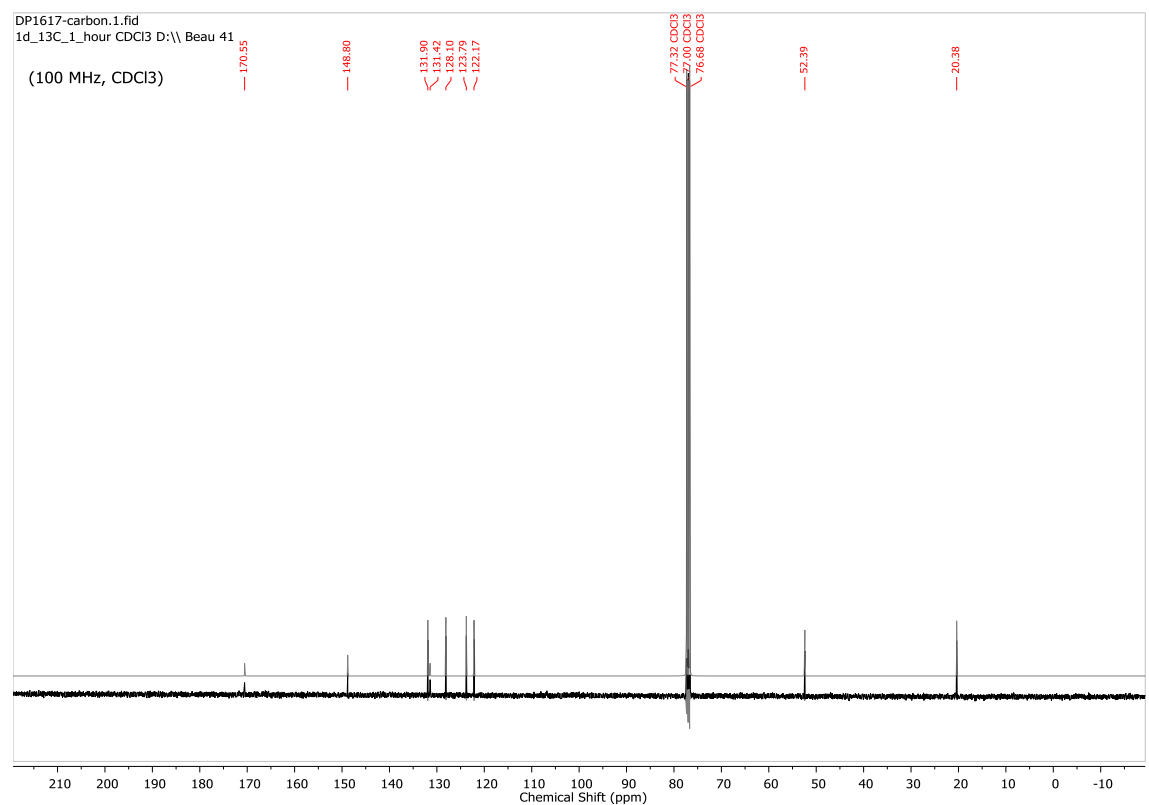

# Supporting Information

<sup>1</sup>H NMR (300 MHz; CDCl<sub>3</sub>):

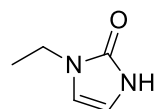

**2v**

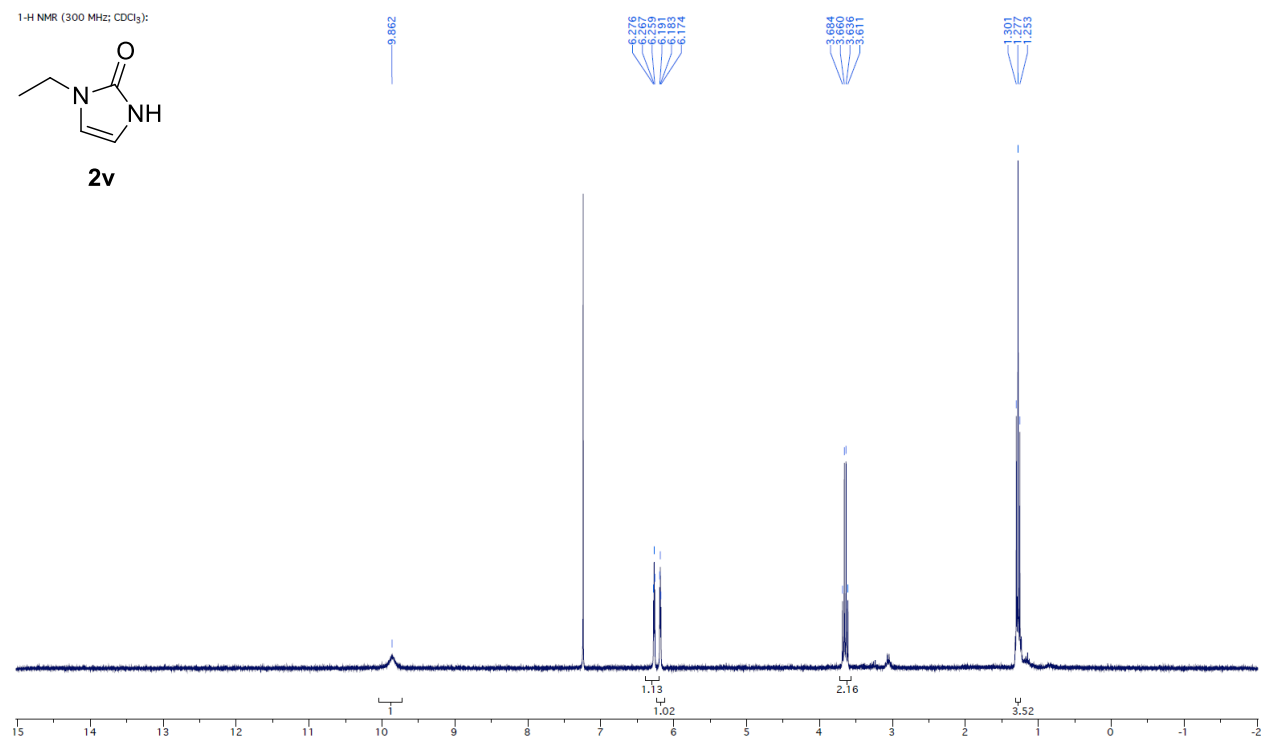

<sup>13</sup>C NMR (101 MHz; CDCl<sub>3</sub>):

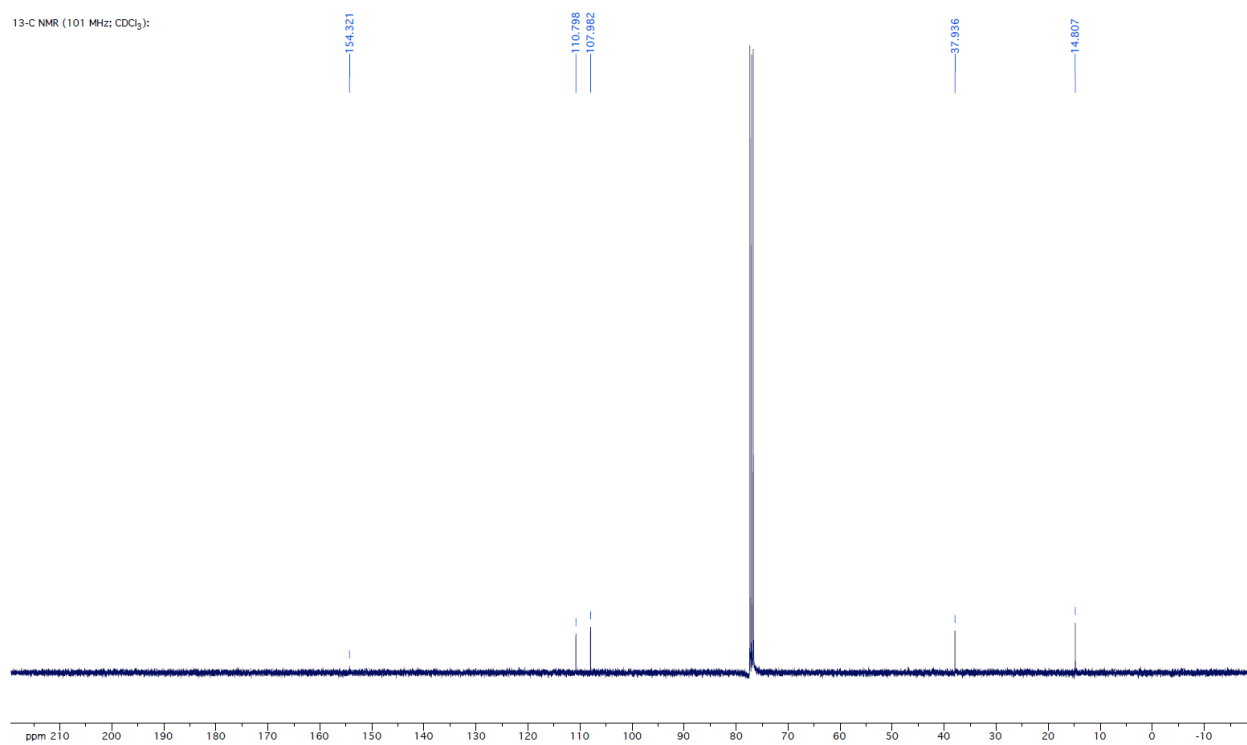

# Supporting Information

<sup>1</sup>H NMR (400 MHz; CDCl<sub>3</sub>):

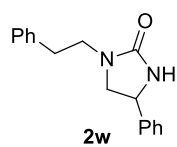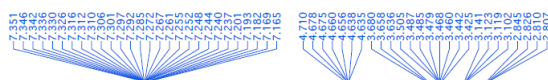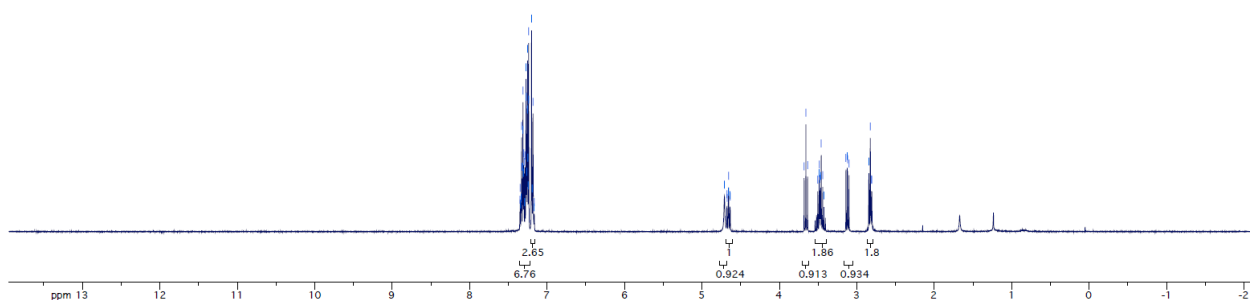

<sup>13</sup>C NMR (101 MHz; CDCl<sub>3</sub>):

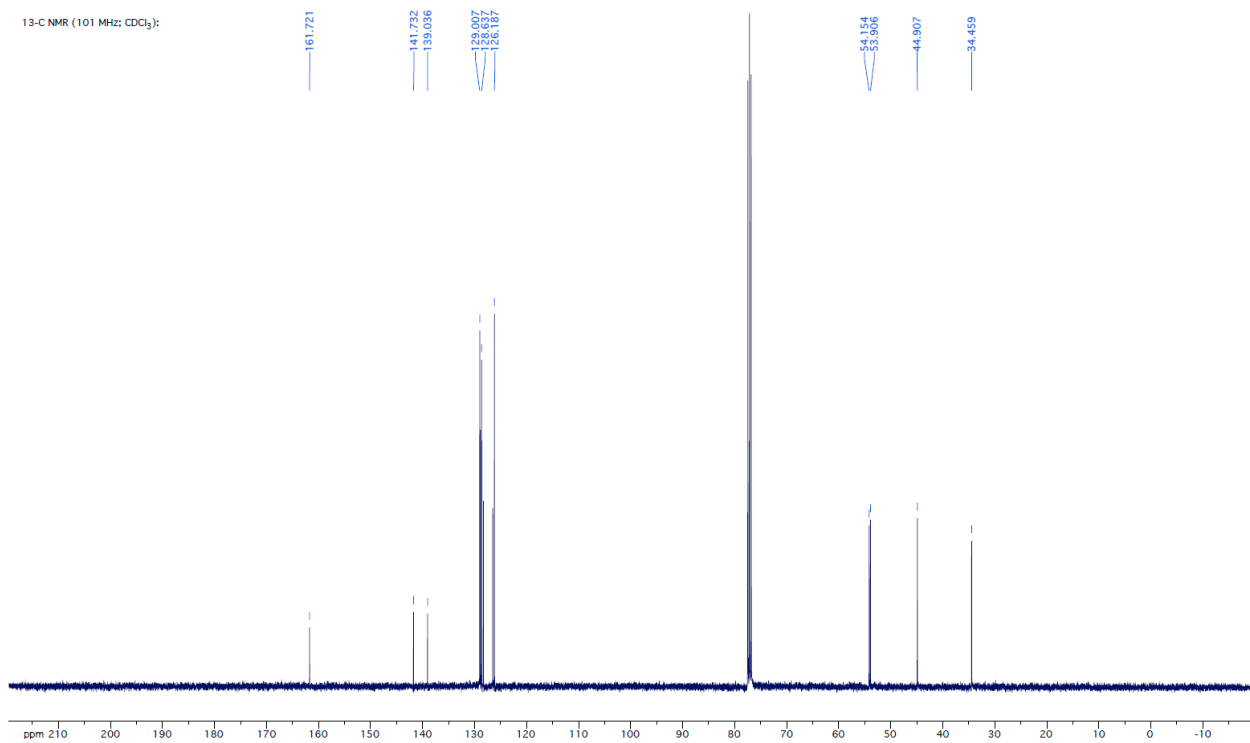

# Supporting Information

<sup>1</sup>H NMR (400 MHz; CDCl<sub>3</sub>):

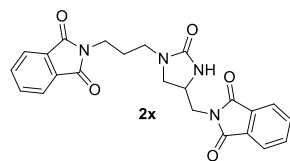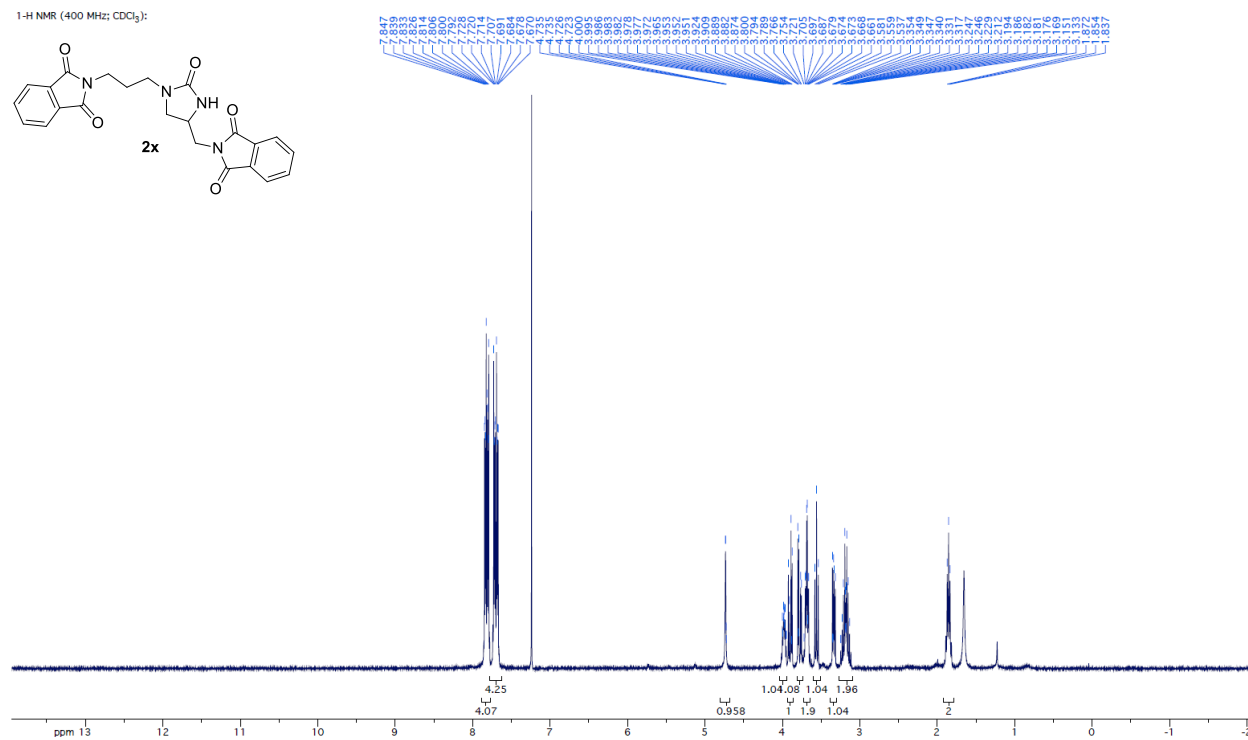

RI13-8-C.2.fid

1d\_13C\_1\_hour CDCl<sub>3</sub> D:\\ Beau 36

(100 MHz, CDCl<sub>3</sub>)

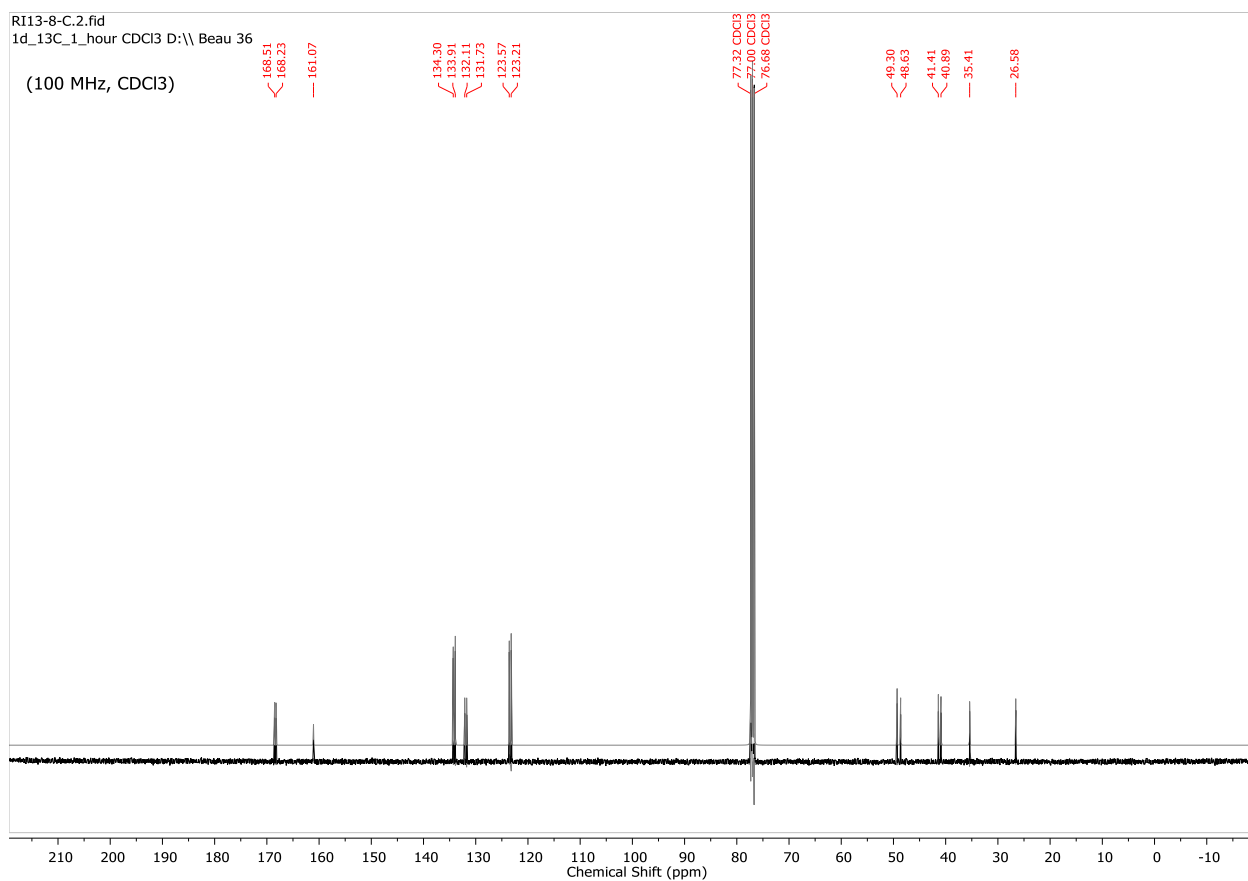

# Supporting Information

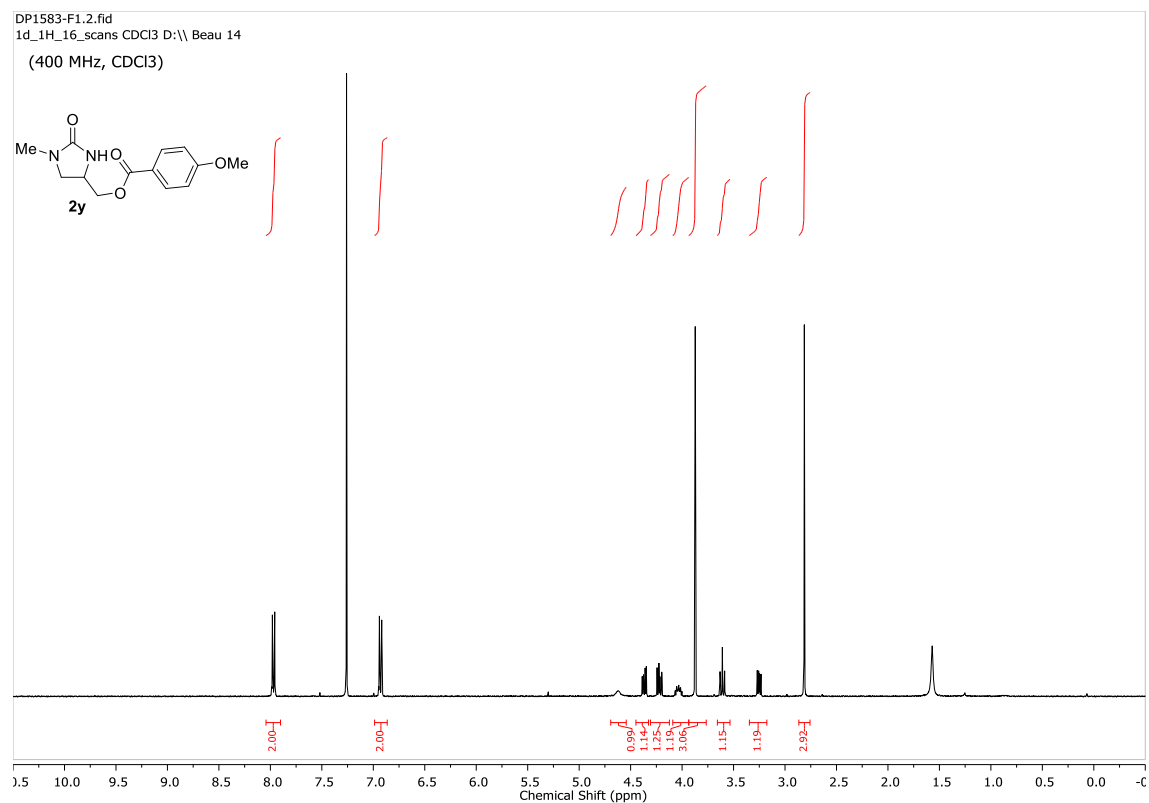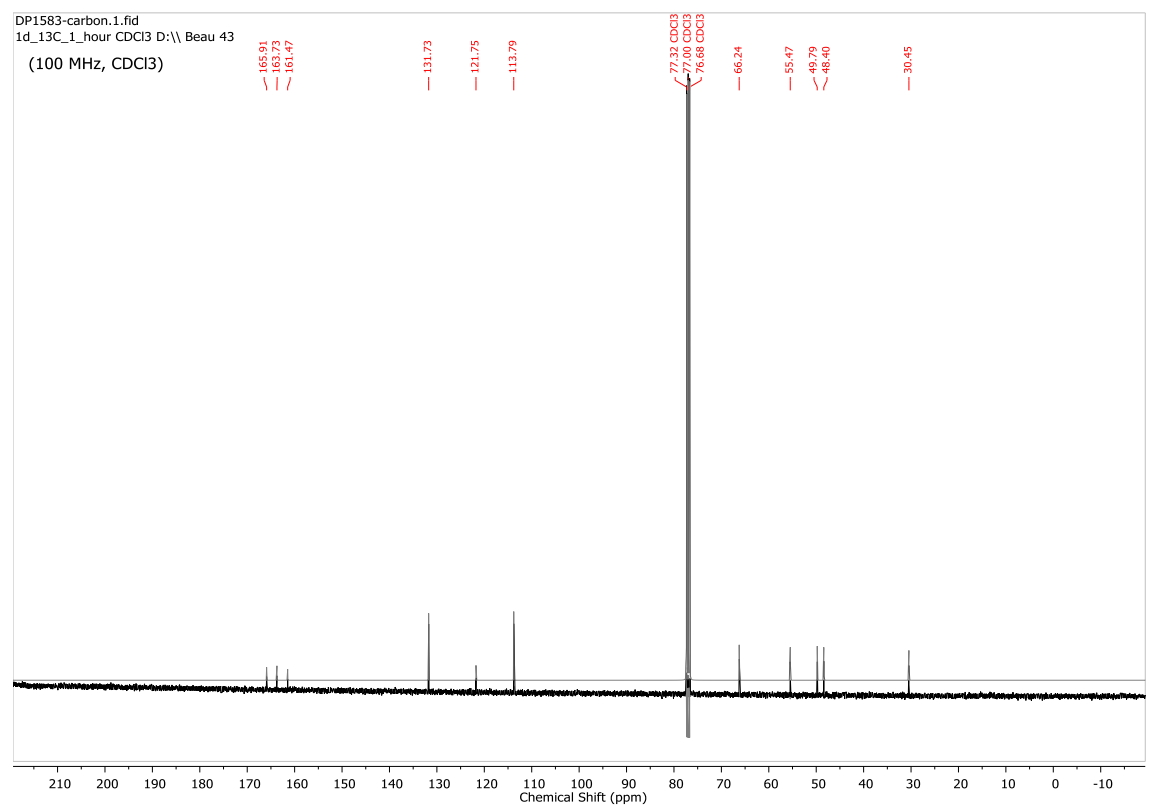



# Supporting Information

<sup>1</sup>H NMR (400 MHz; CDCl<sub>3</sub>):

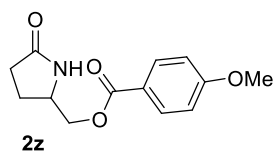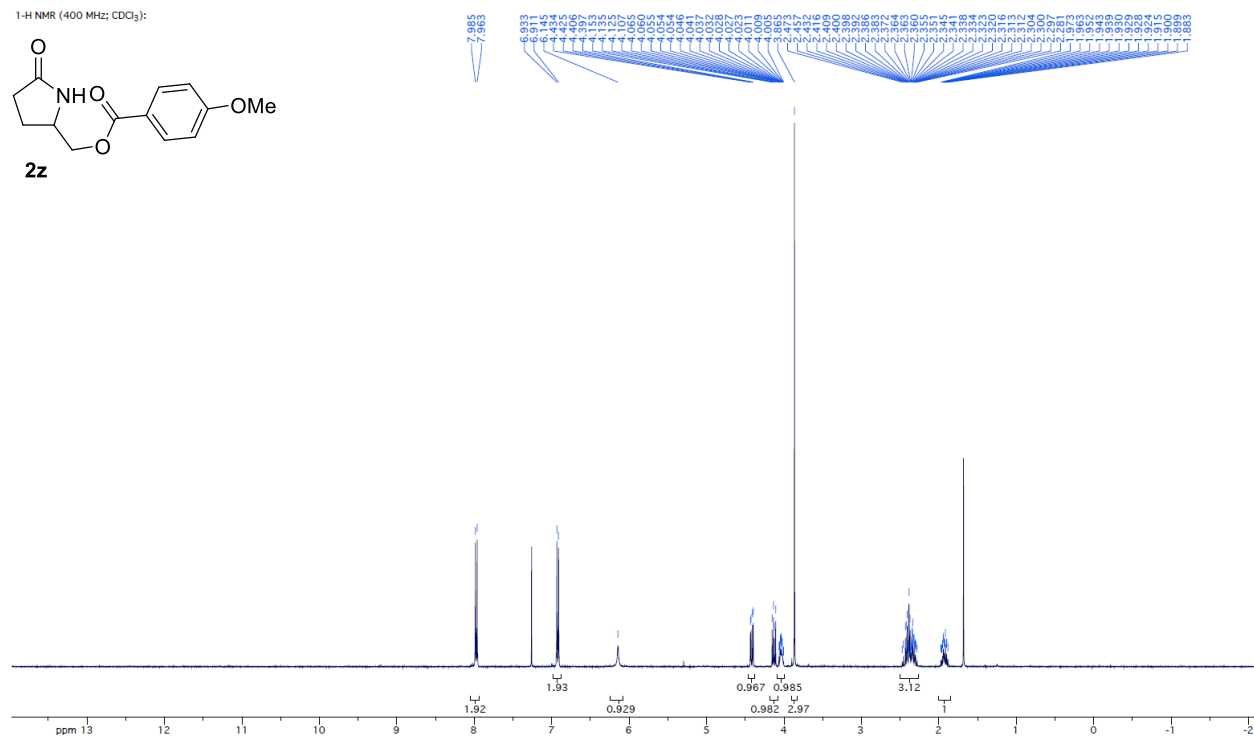

<sup>13</sup>C NMR (101 MHz; CDCl<sub>3</sub>):

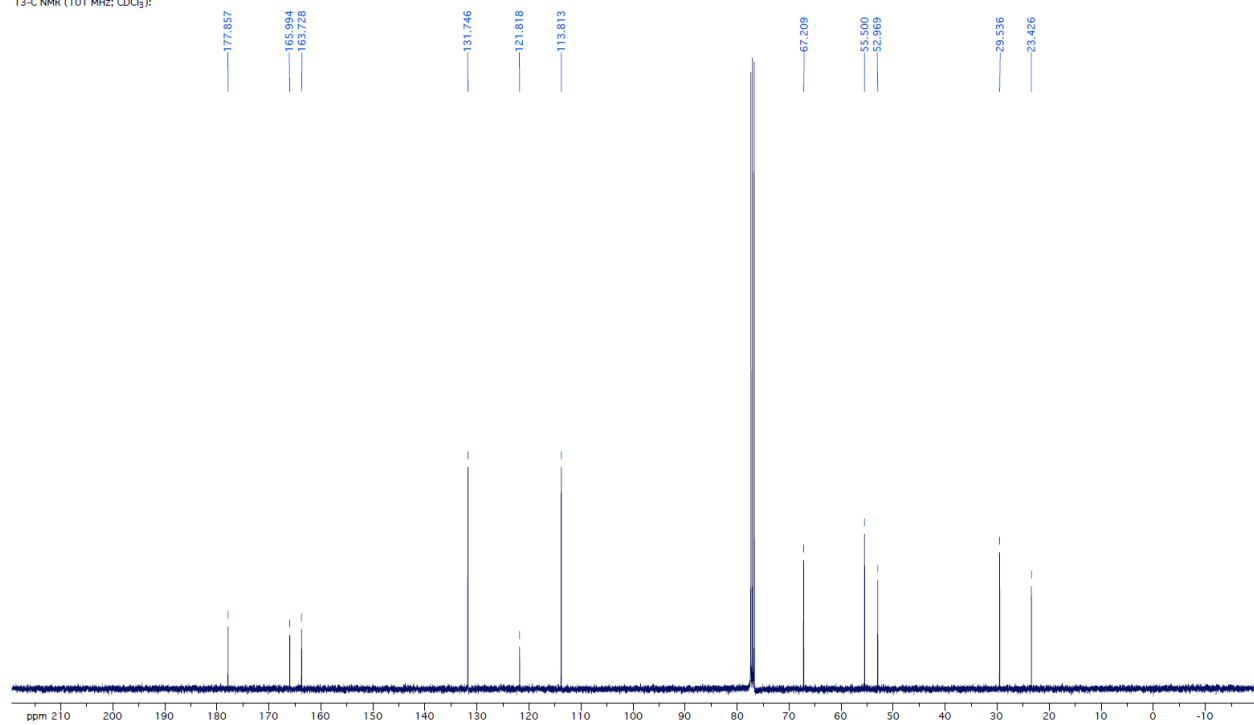

1-H NMR (400 MHz; CDCl<sub>3</sub>):

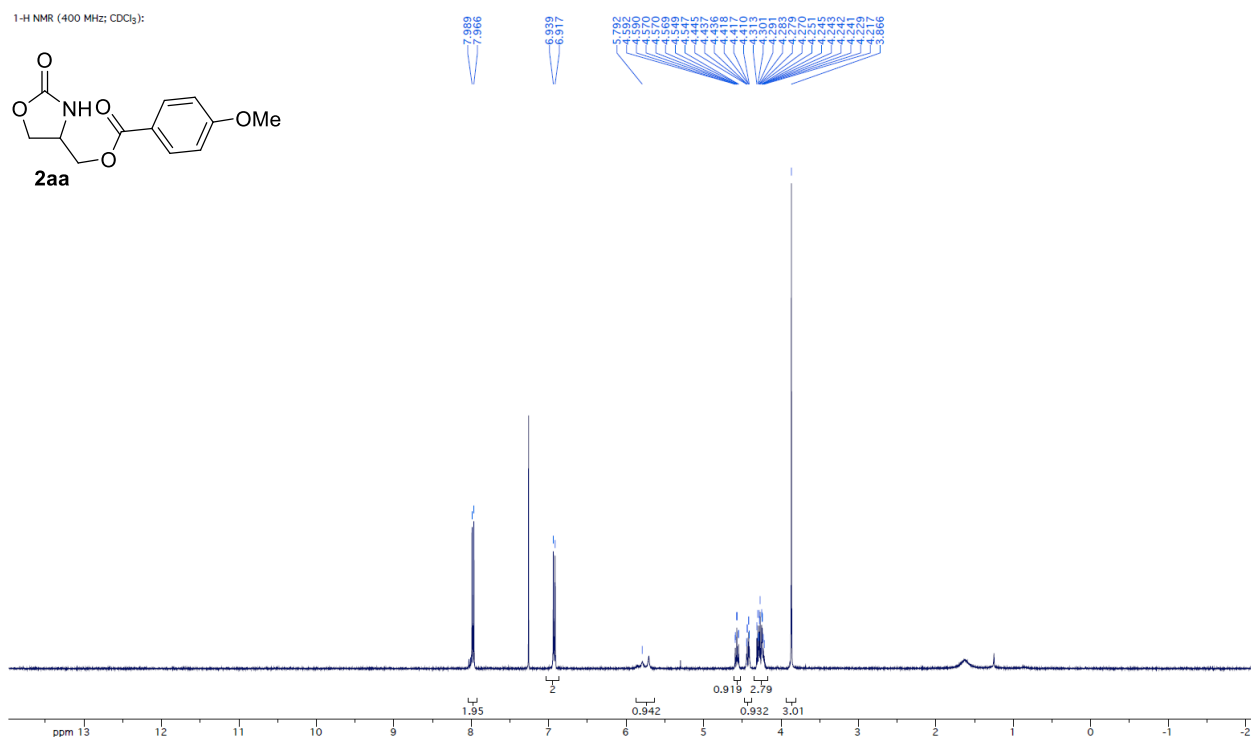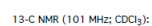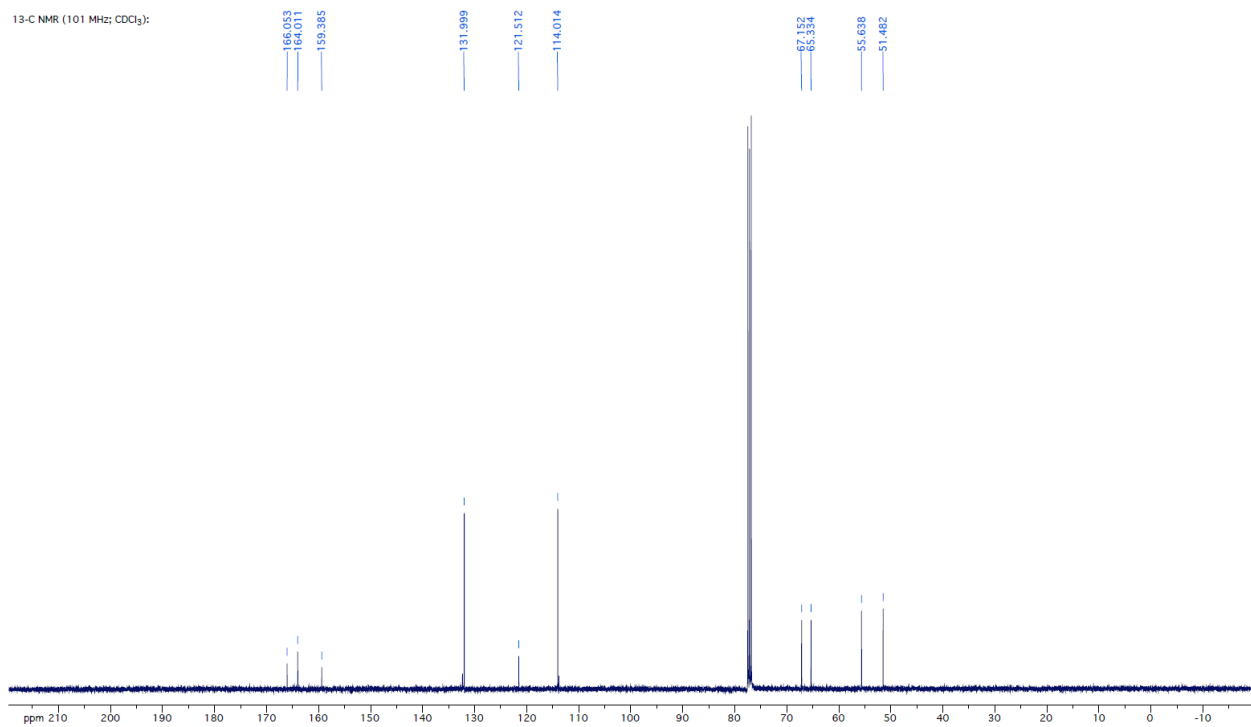

<sup>1</sup>H NMR (400 MHz; CDCl<sub>3</sub>):

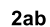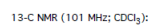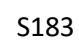

# Supporting Information

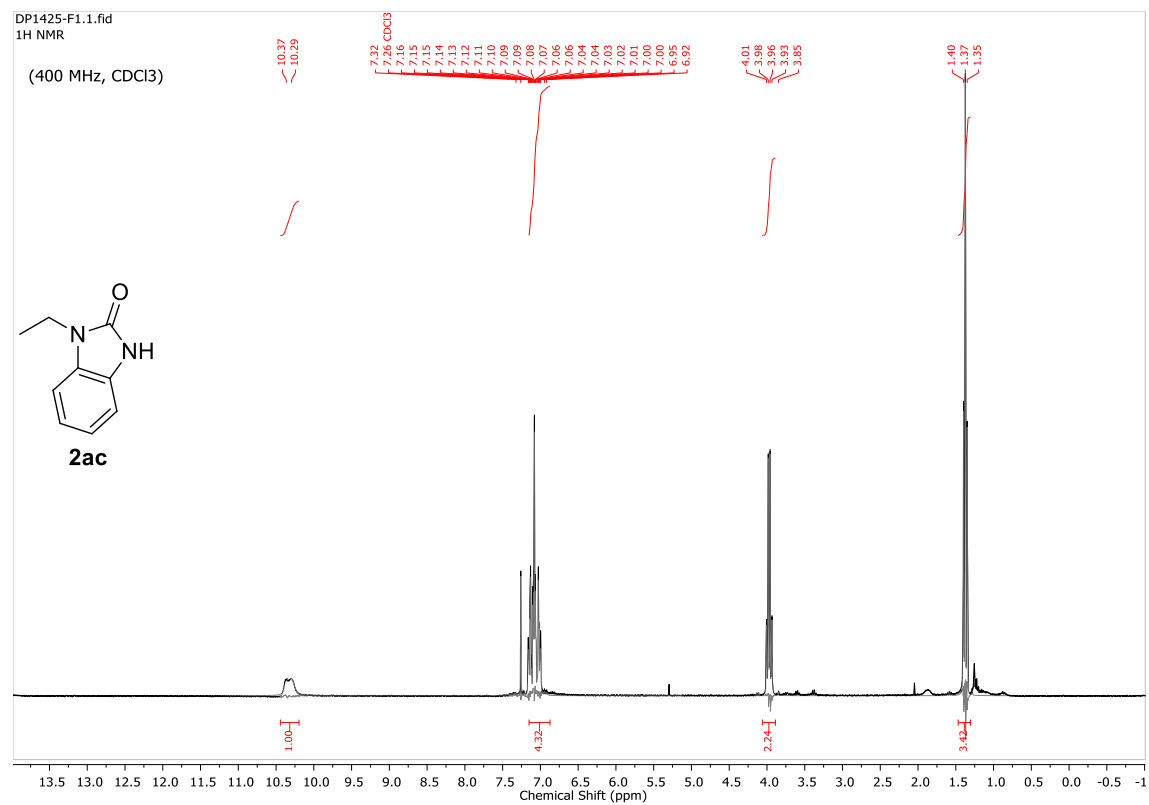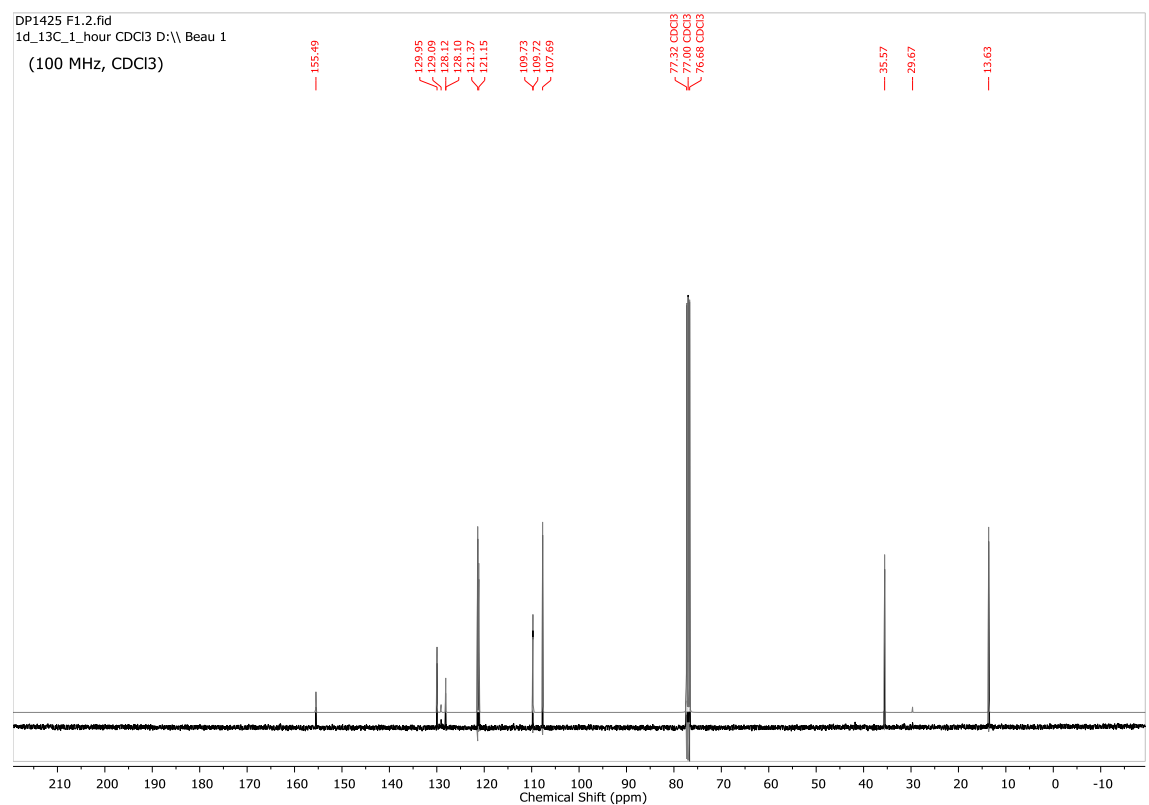

# Supporting Information

<sup>1</sup>H NMR (400 MHz; CDCl<sub>3</sub>):

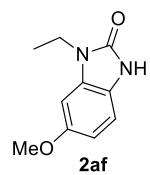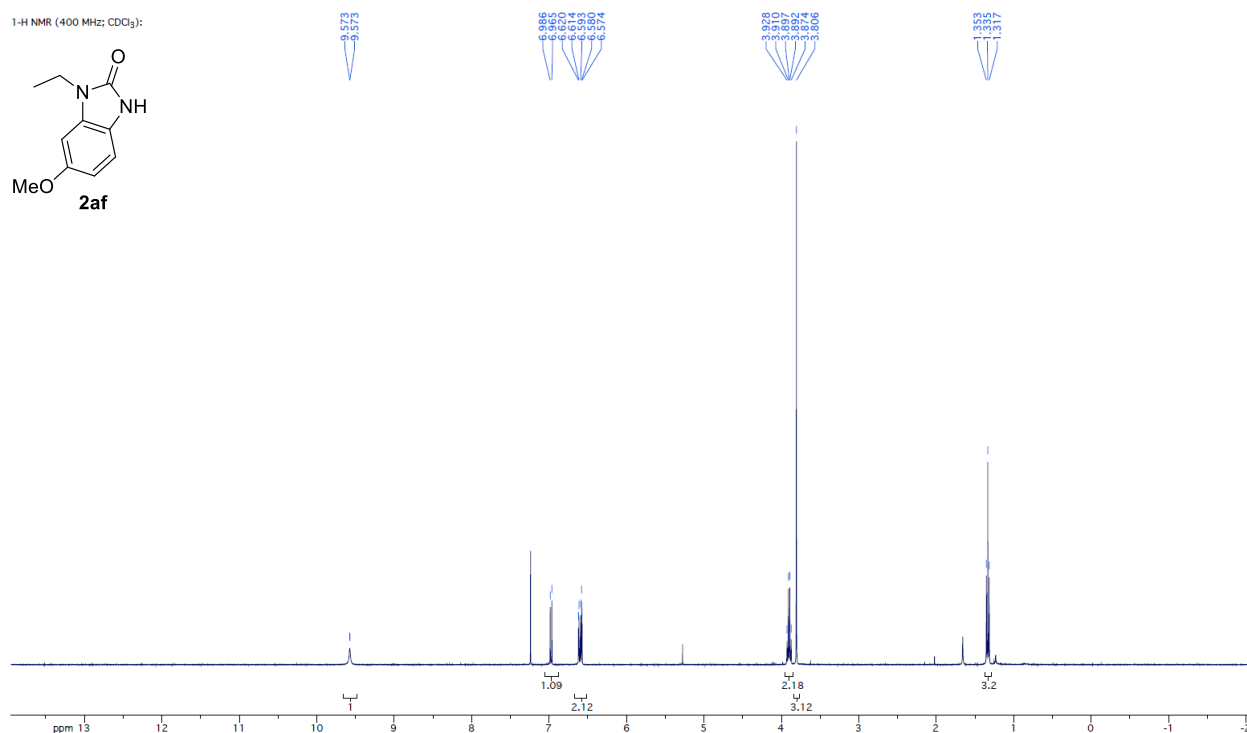

<sup>13</sup>C NMR (101 MHz; CDCl<sub>3</sub>):

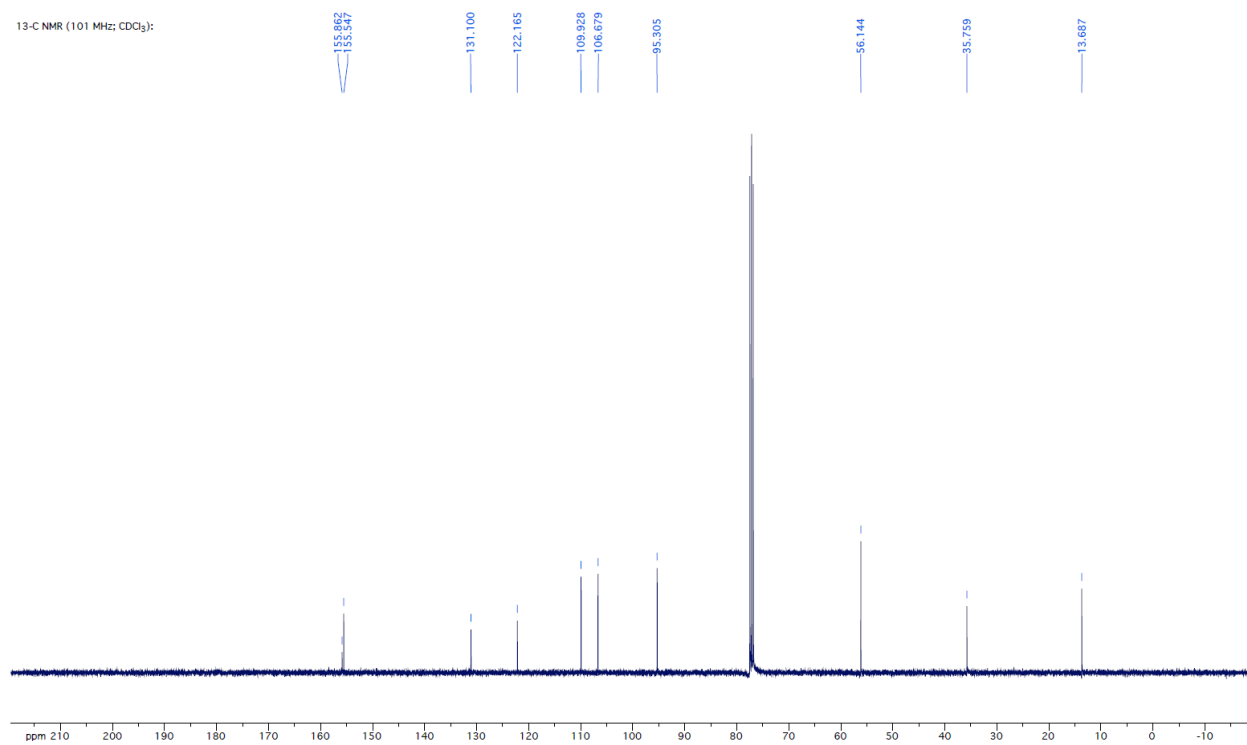

# Supporting Information

<sup>1</sup>H NMR (400 MHz; CDCl<sub>3</sub>):

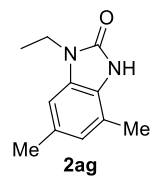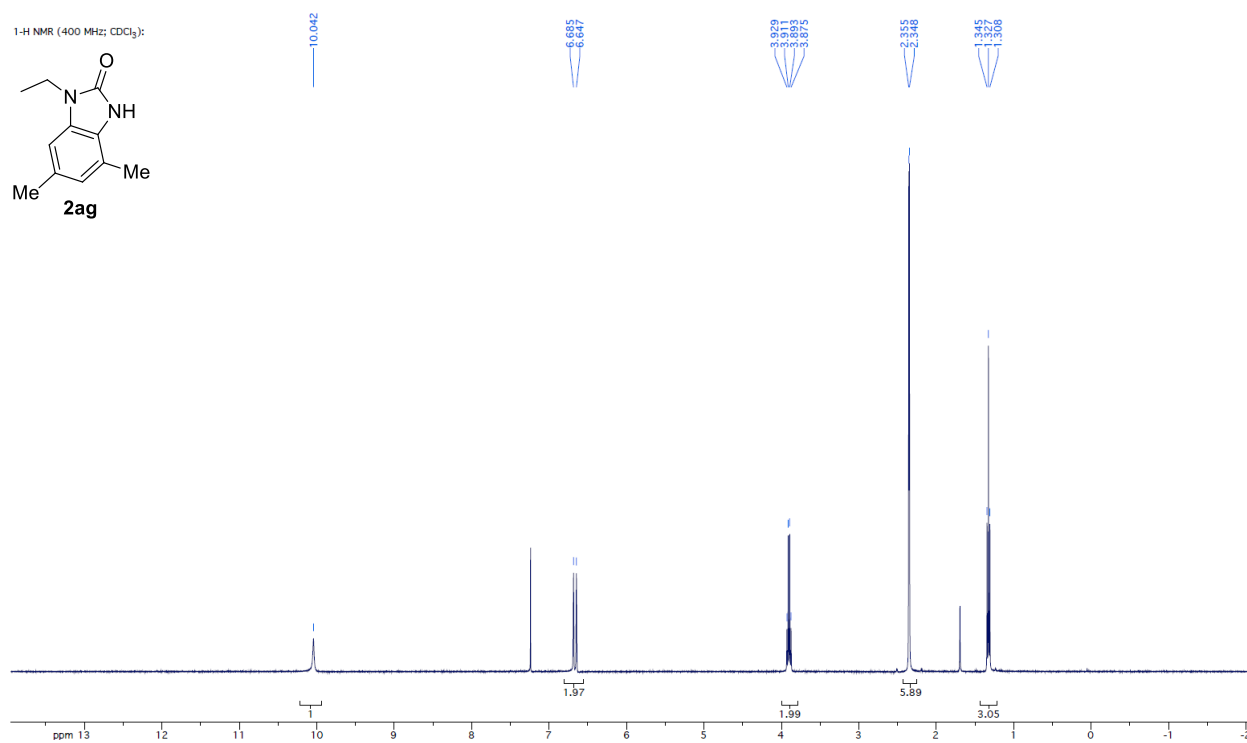

<sup>13</sup>C NMR (101 MHz; CDCl<sub>3</sub>):

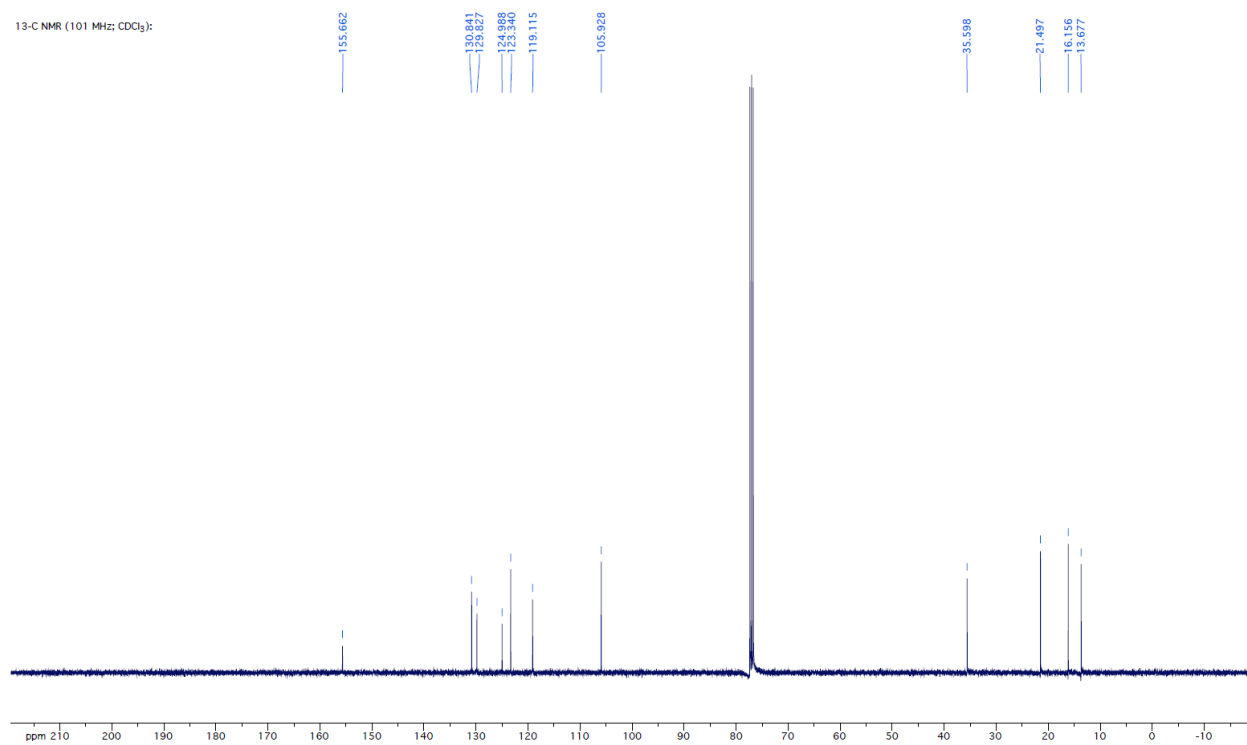

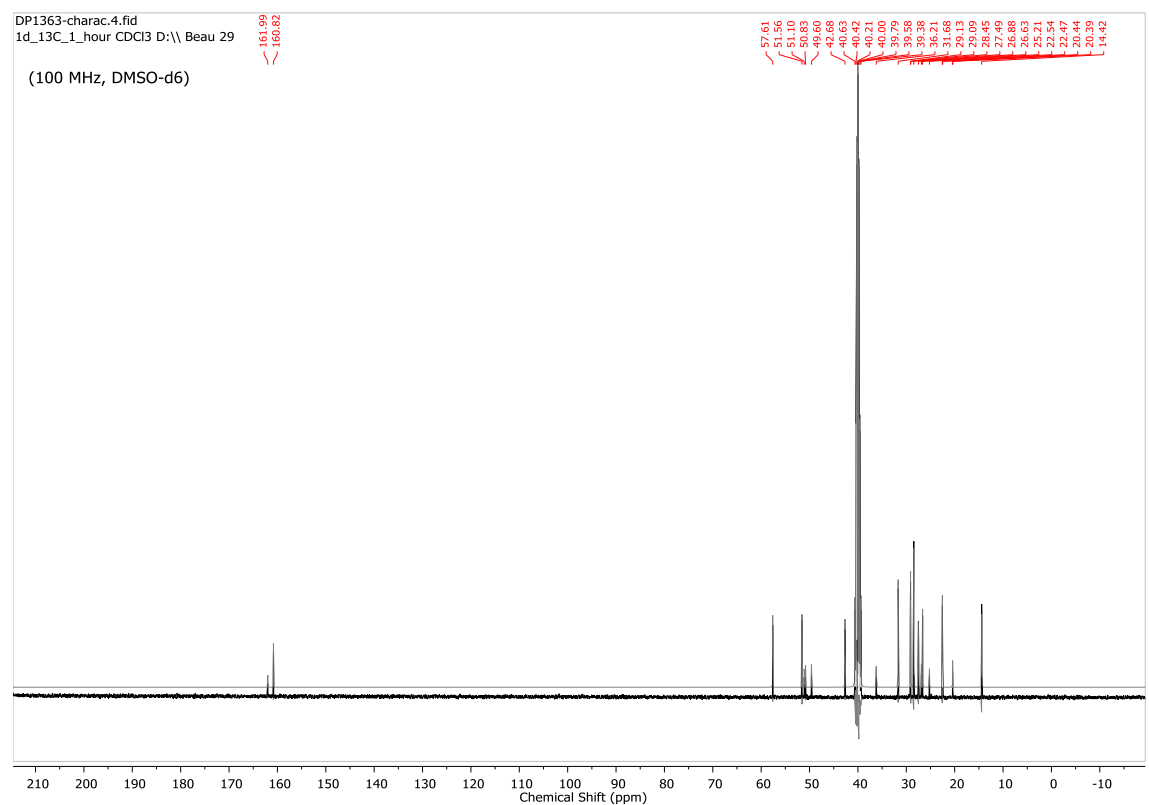

<sup>1</sup>H NMR (400 MHz; CDCl<sub>3</sub>):

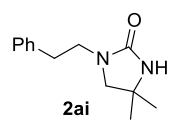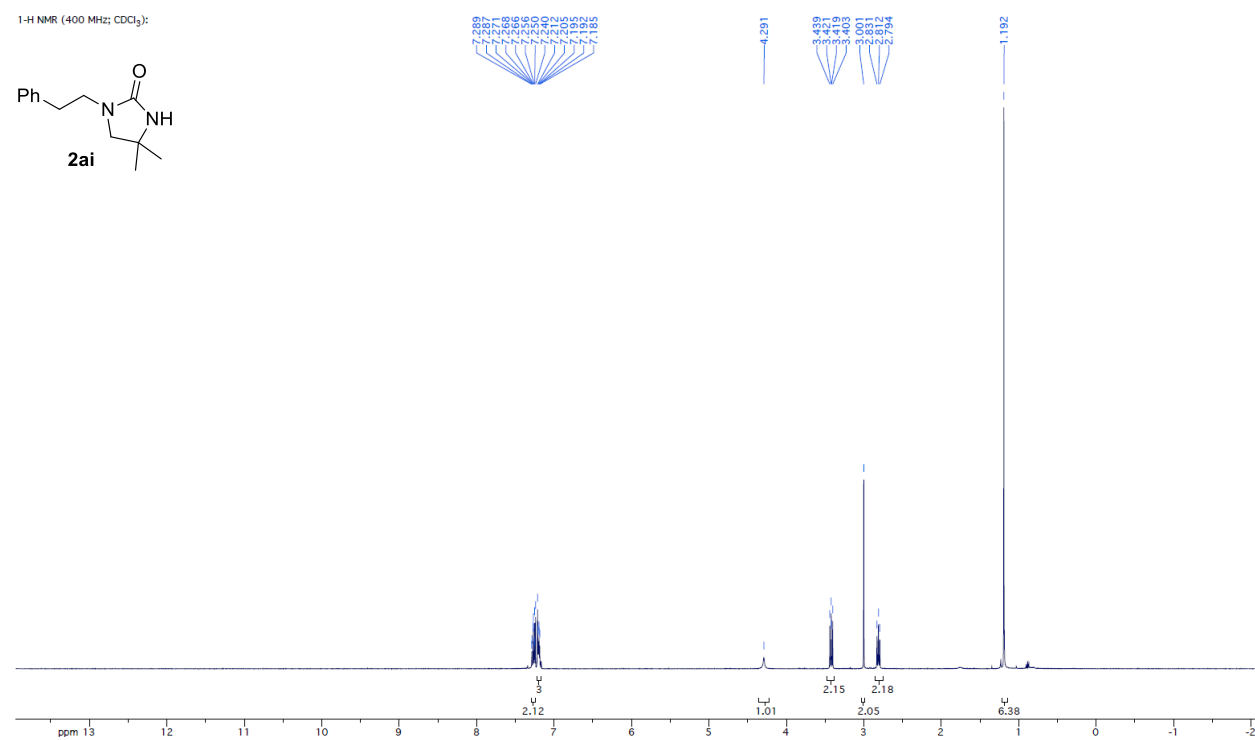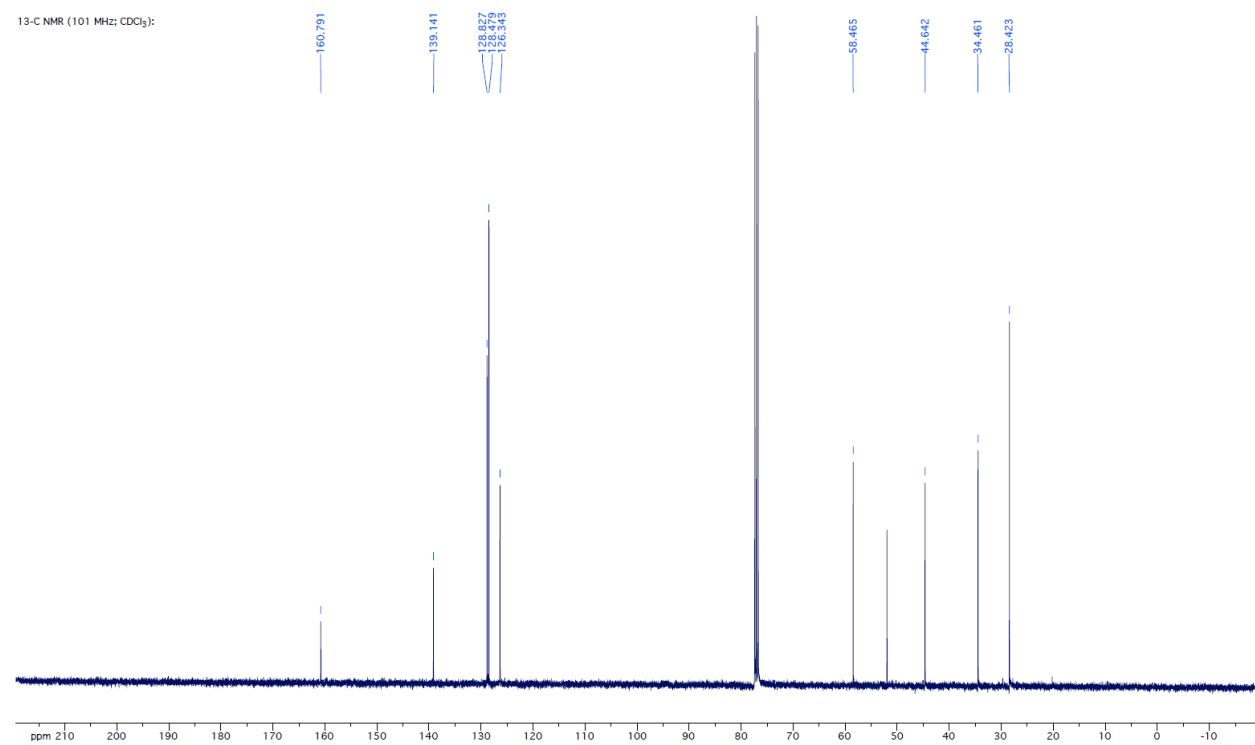



<sup>1</sup>H NMR (400 MHz; CDCl<sub>3</sub>):

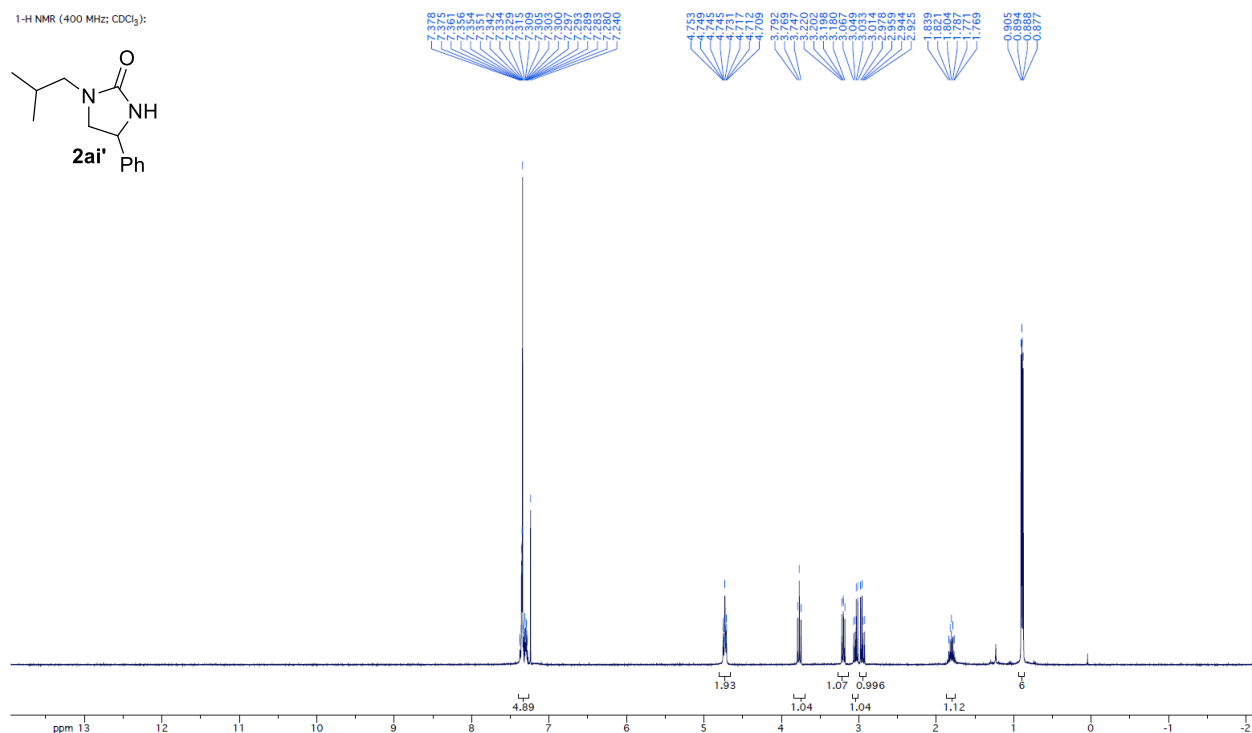

<sup>13</sup>C NMR (101 MHz; CDCl<sub>3</sub>):

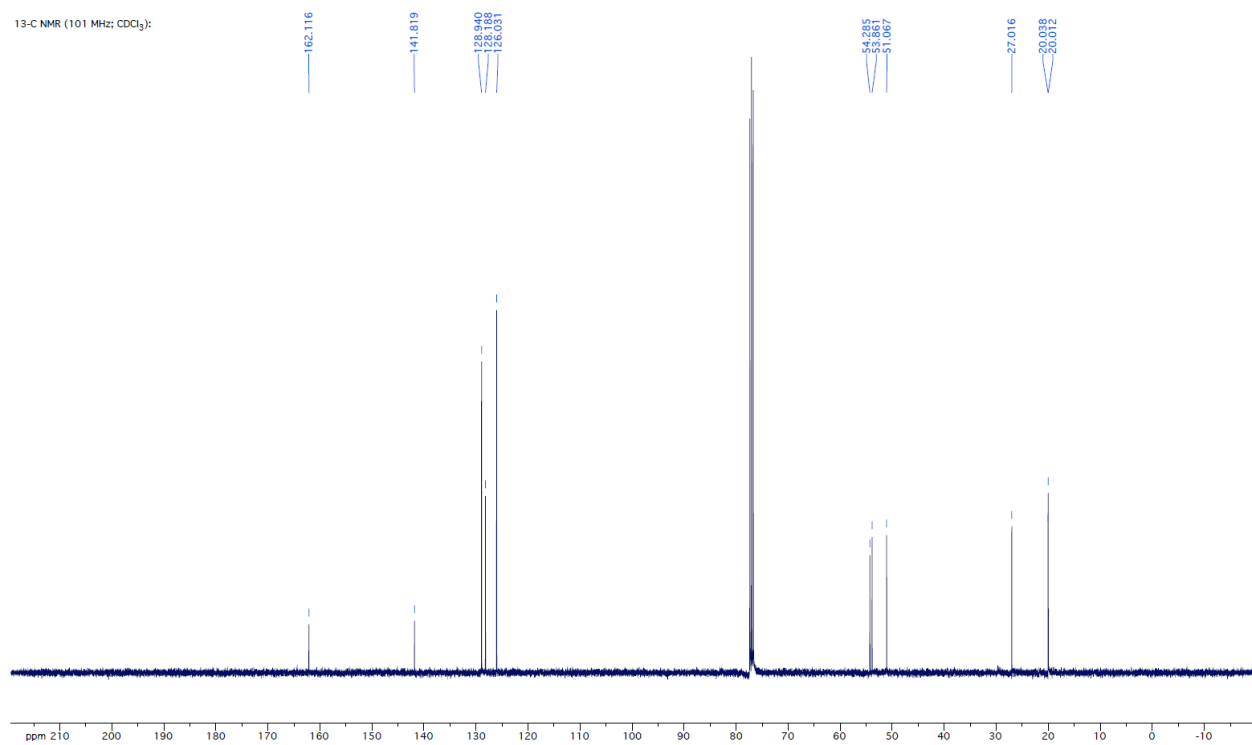

# Supporting Information

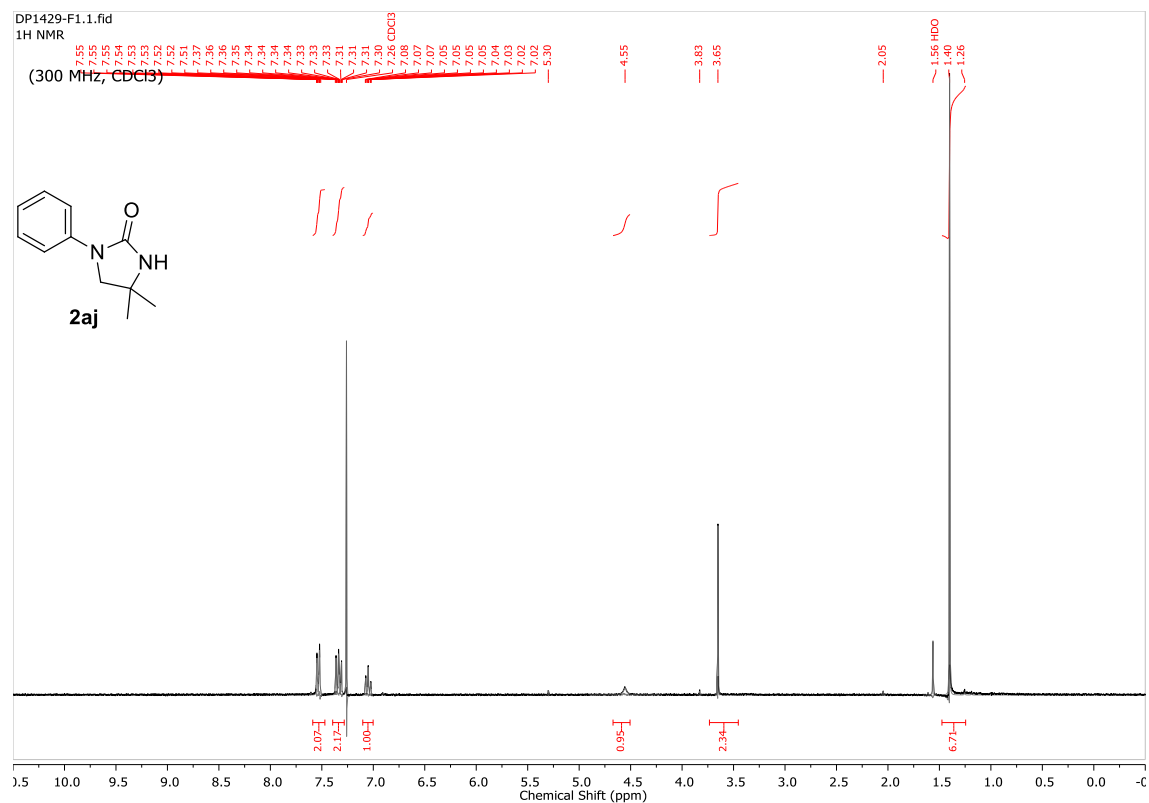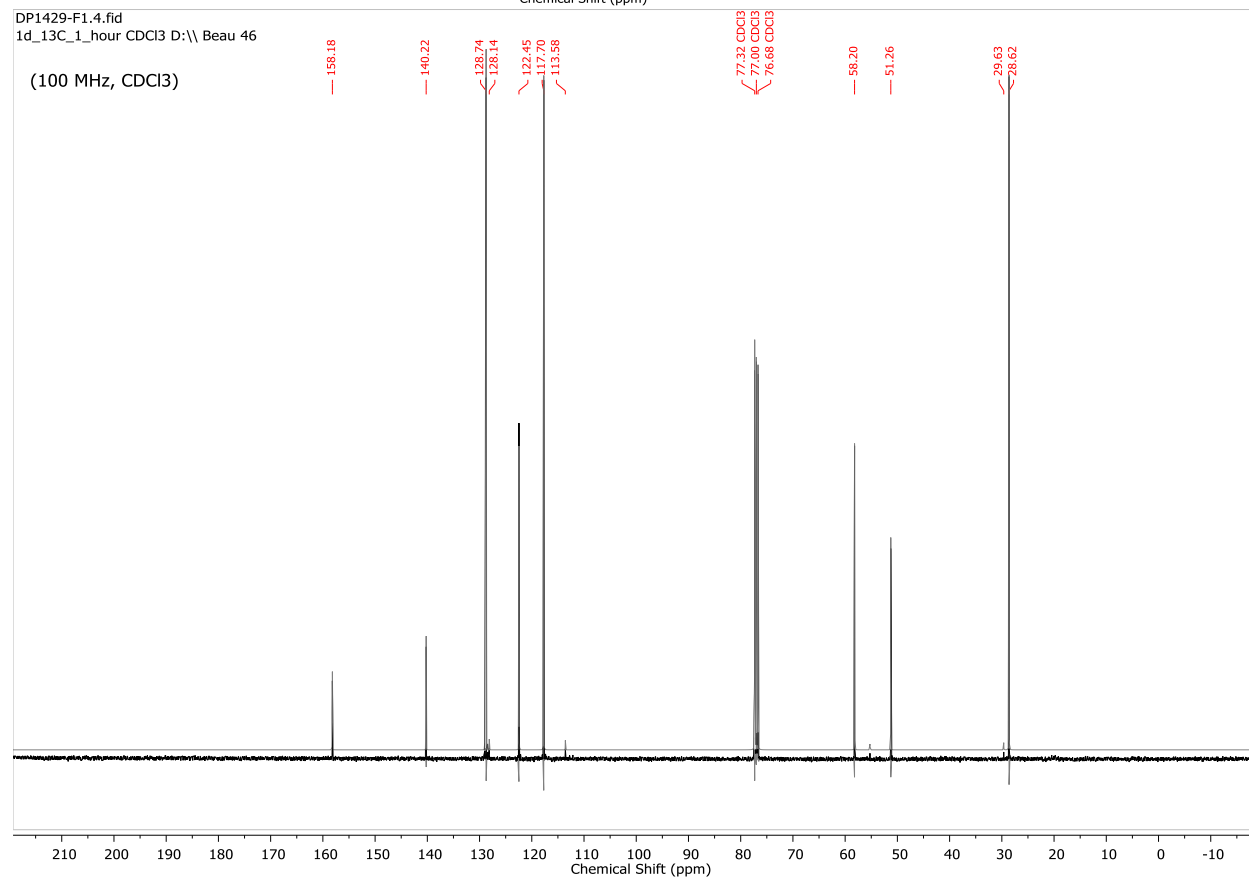

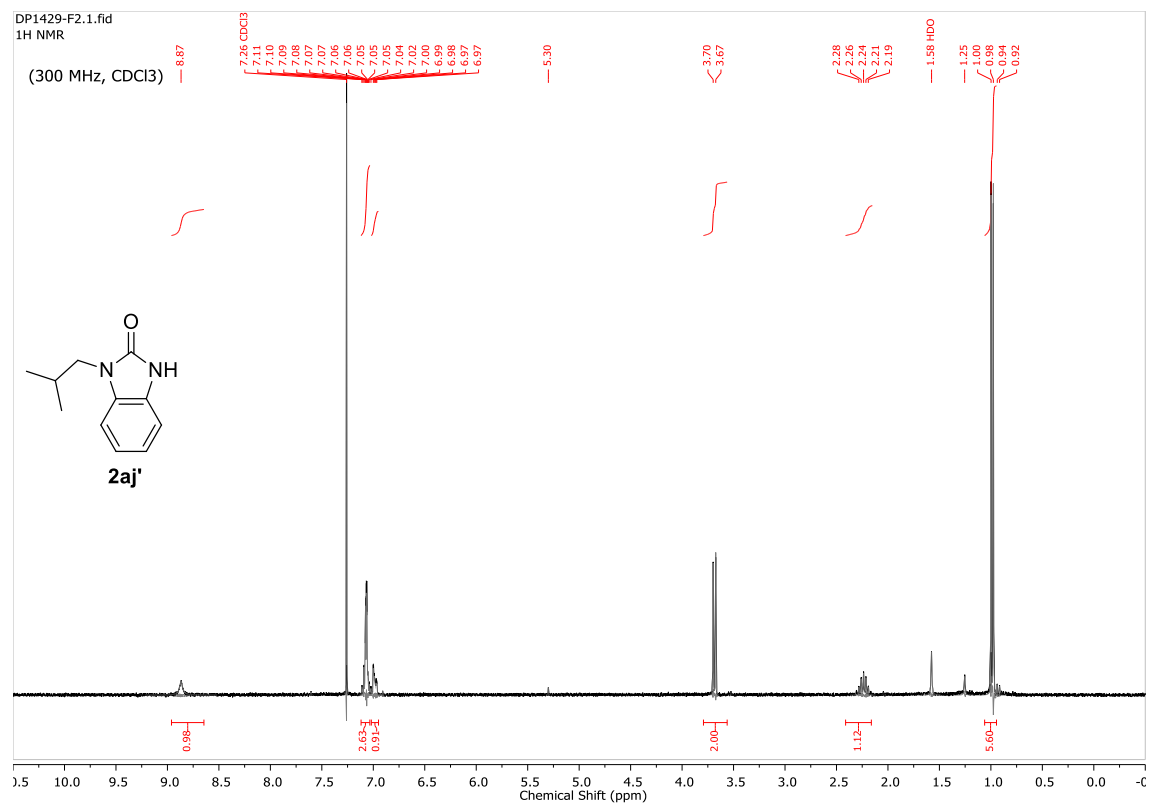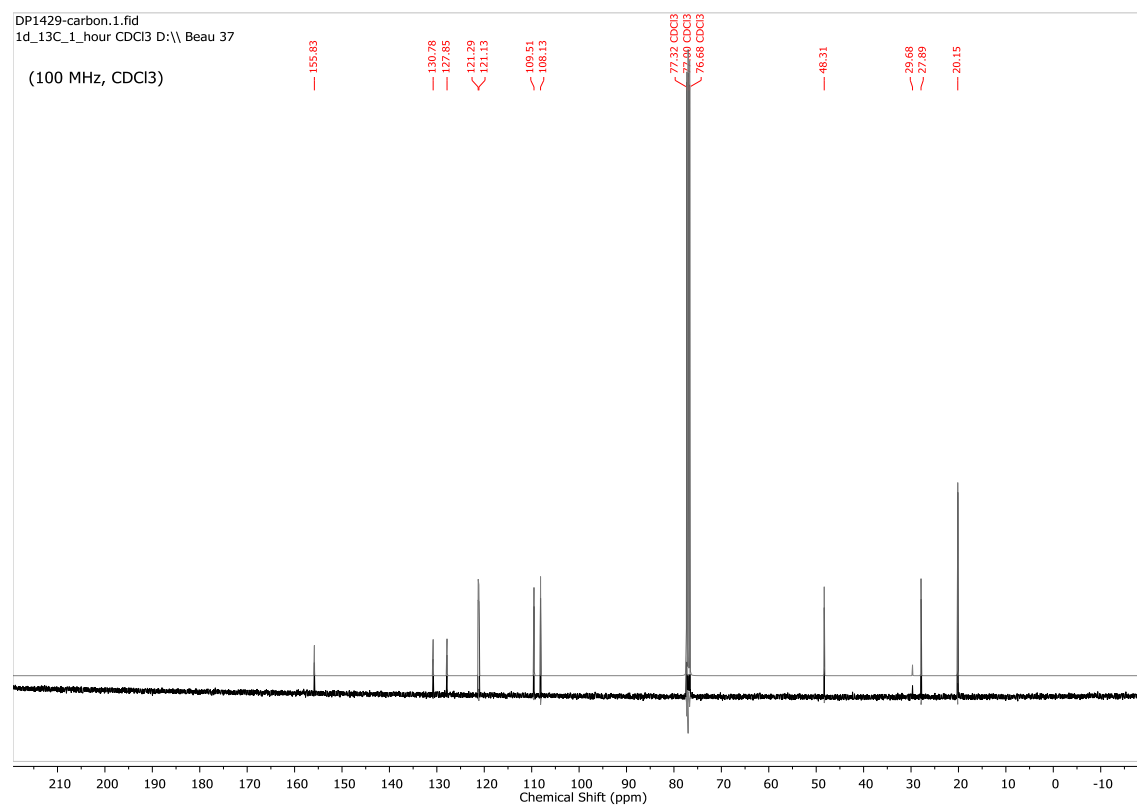

# Supporting Information

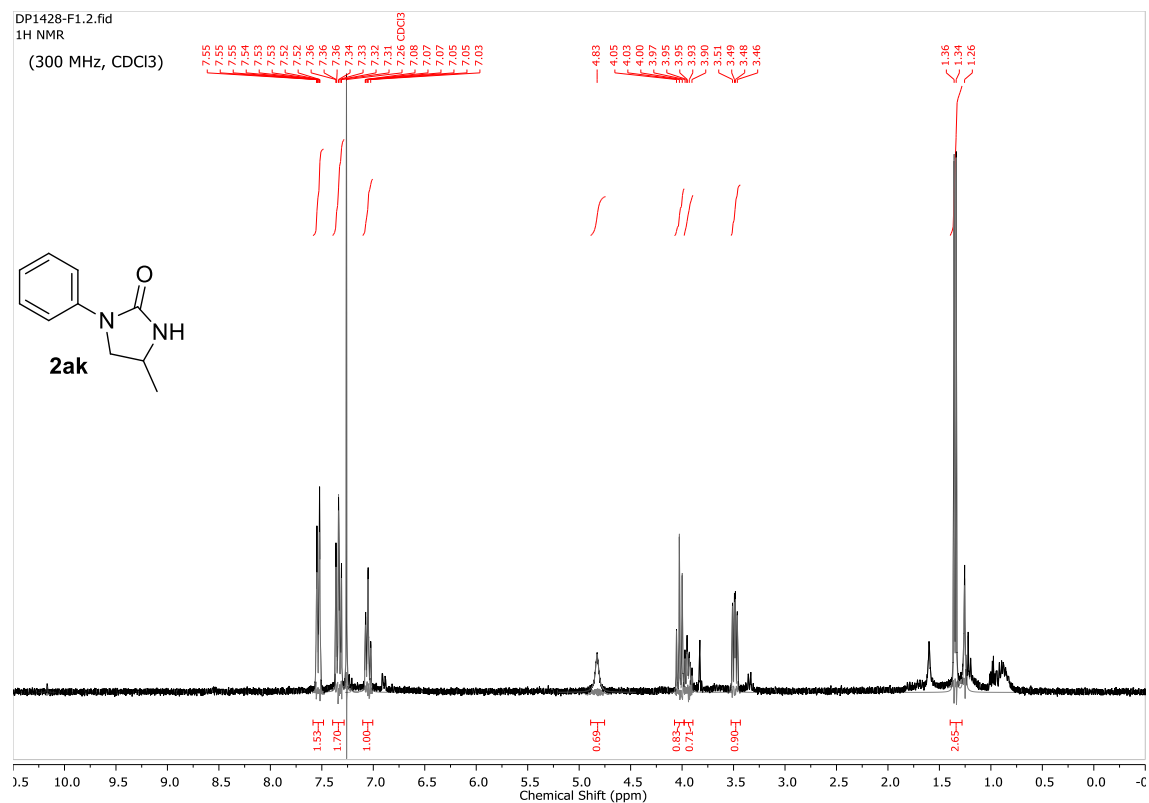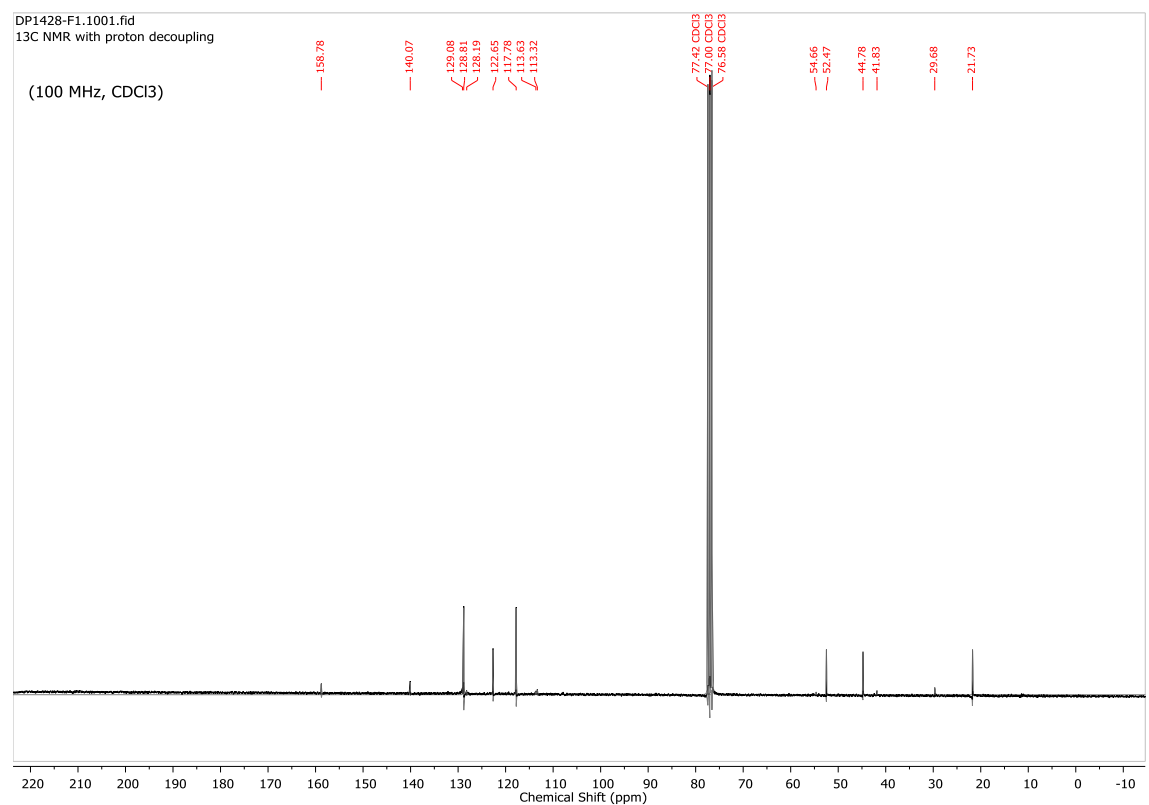

# Supporting Information

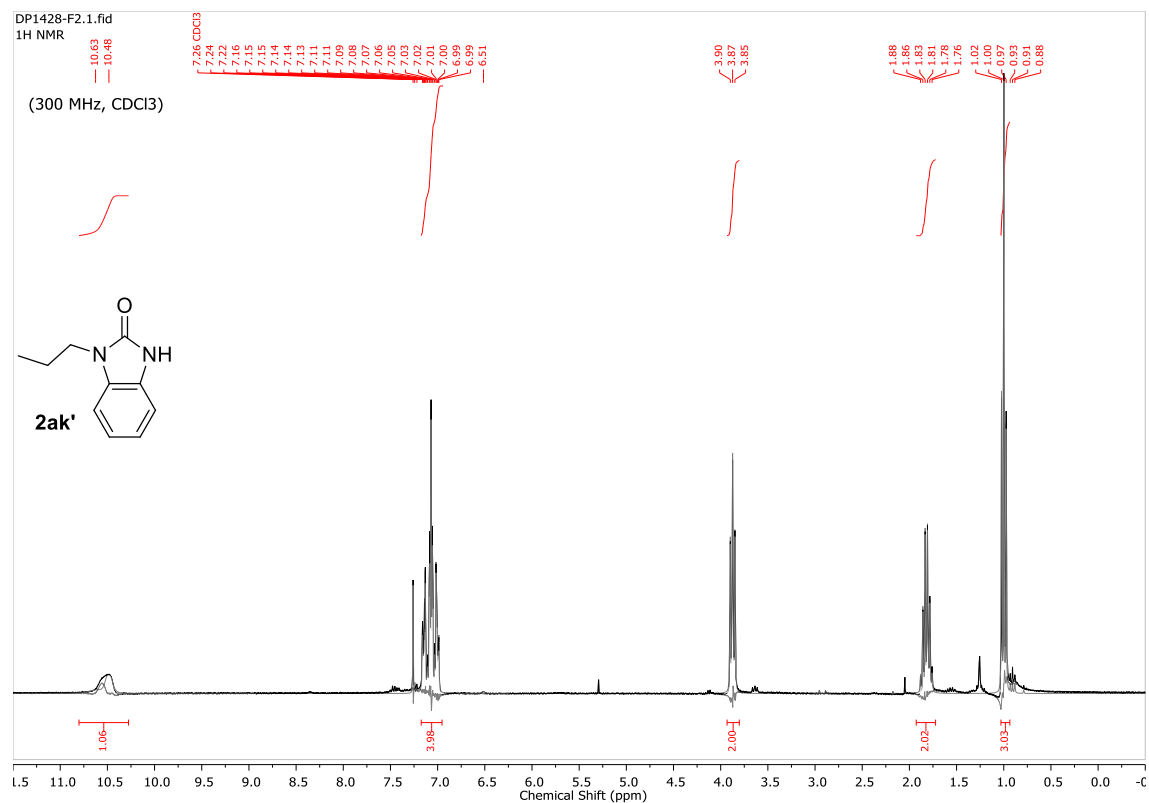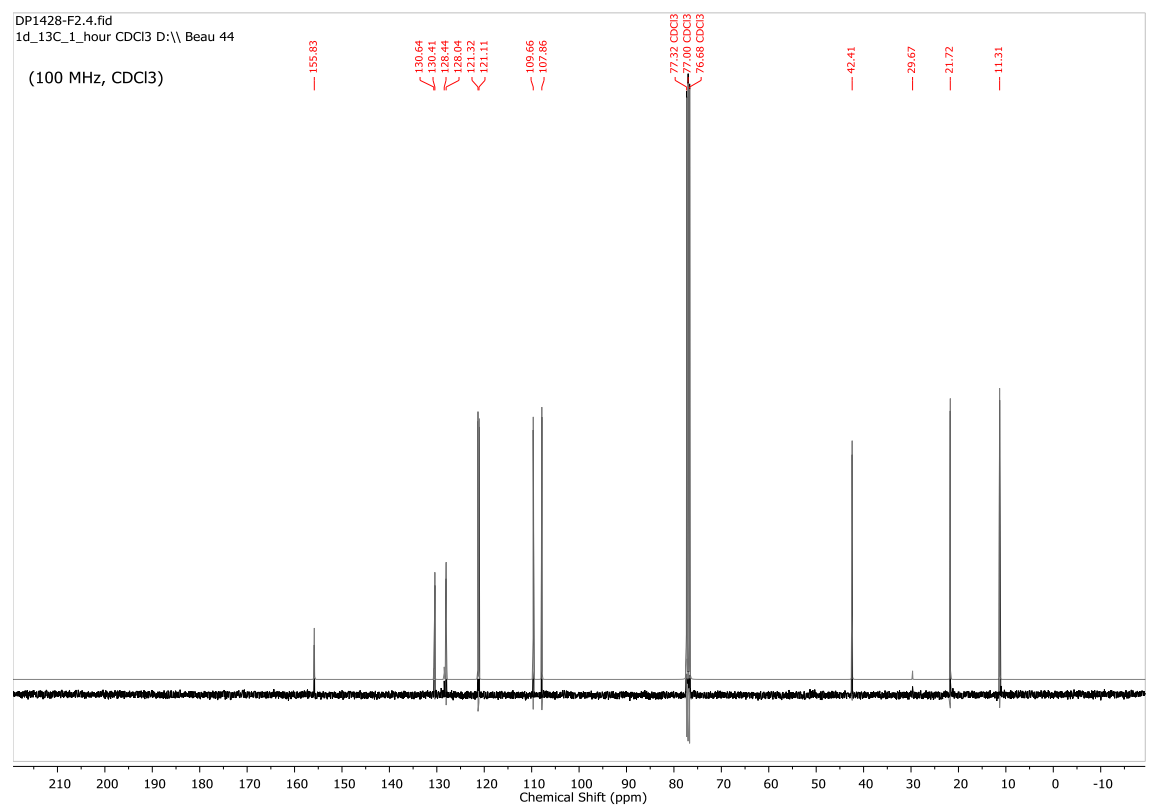

# Supporting Information

<sup>1</sup>H NMR (400 MHz; CDCl<sub>3</sub>):

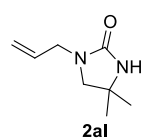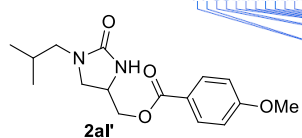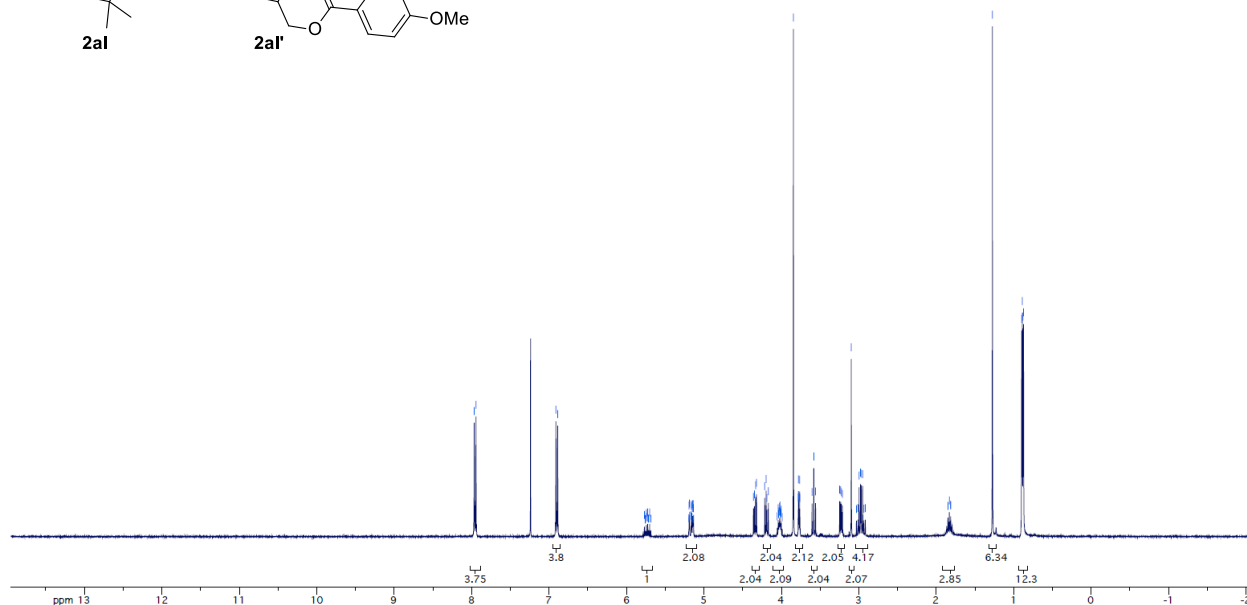

<sup>13</sup>C NMR (101 MHz; CDCl<sub>3</sub>):

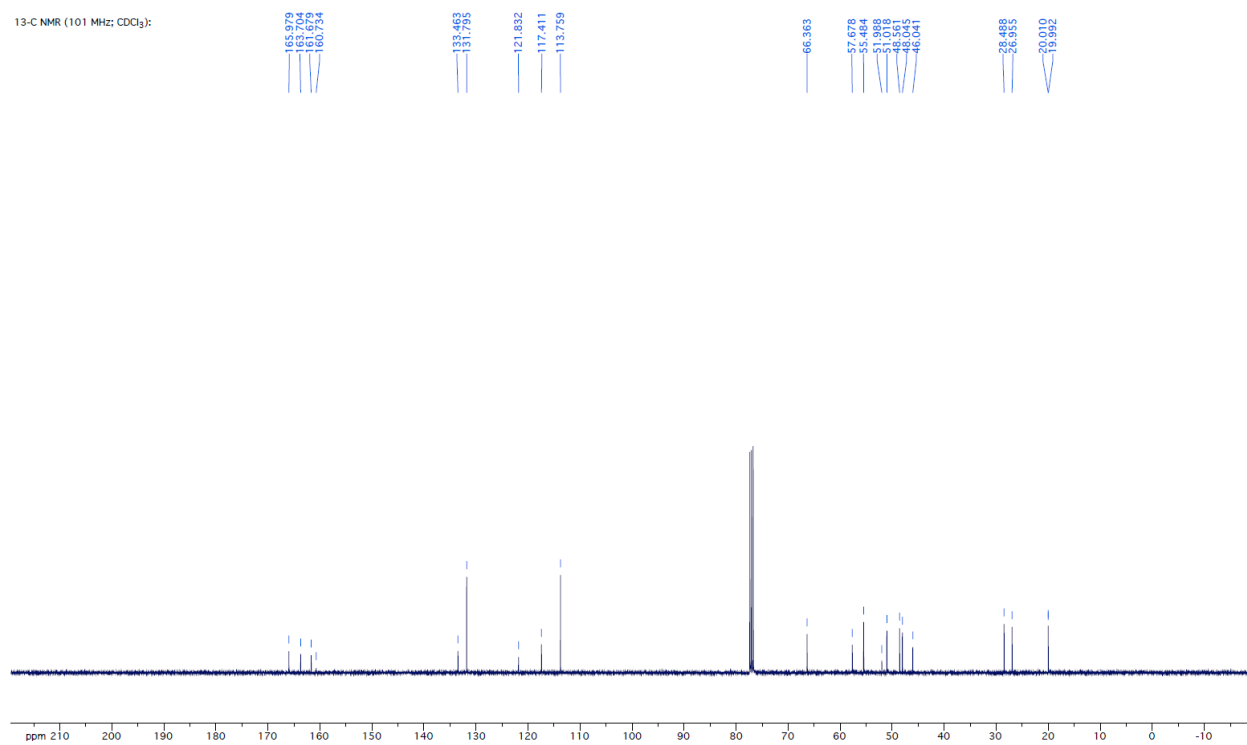

**<sup>1</sup>H NMR (400 MHz; CDCl<sub>3</sub>):**

**2am** C=CCN1C(=O)NCCC1 **2am'** CCCCCCCCN1C(=O)NCCC1C(=O)Oc2ccc(OC)cc2

ppm 13 12 11 10 9 8 7 6 5 4 3 2 1 0 -1 -2

2.01 0.109 0.241 0.843 0.997 1.020 2.17 0.216 0.188 2.51 12 4.03

**<sup>13</sup>C NMR (101 MHz; CDCl<sub>3</sub>):**

ppm 210 200 190 180 170 160 150 140 130 120 110 100 90 80 70 60 50 40 30 20 10 0 -10

165.572 165.571 161.373 131.786 121.826 113.768 66.326 55.478 48.576 47.411 43.366 31.888 29.822 29.222 26.727 22.649 14.096

# Supporting Information

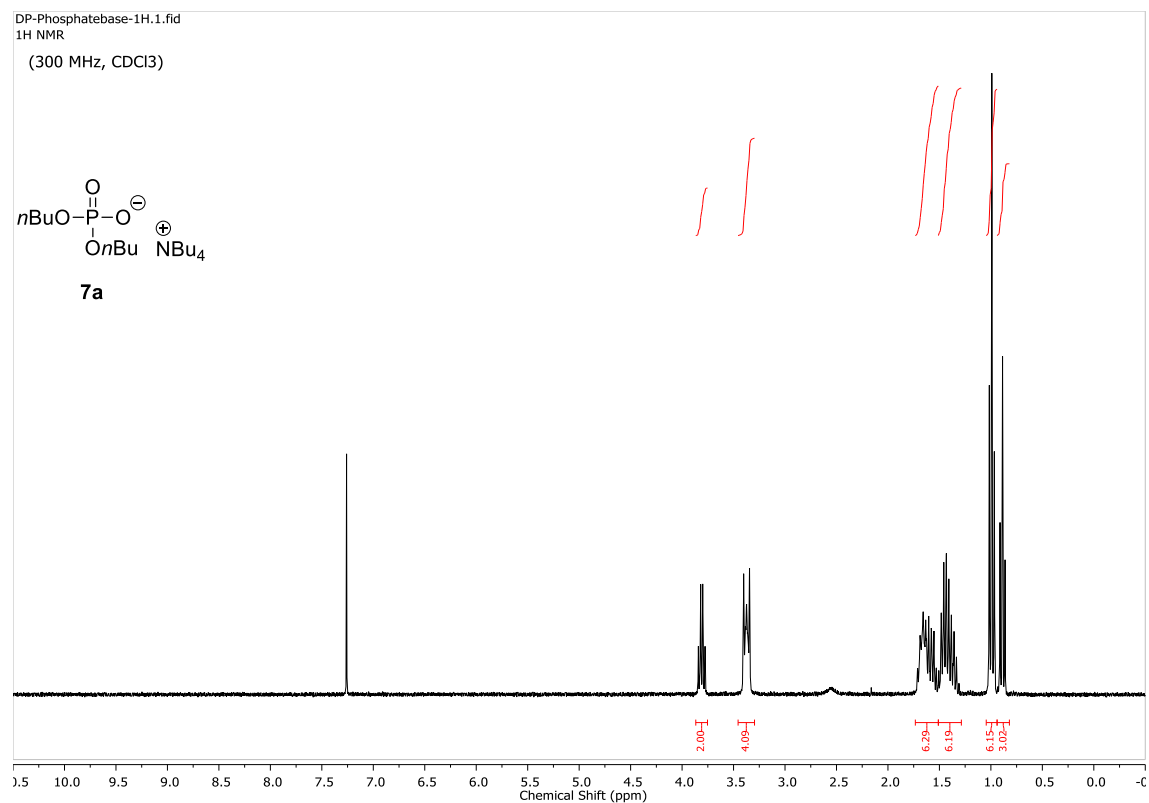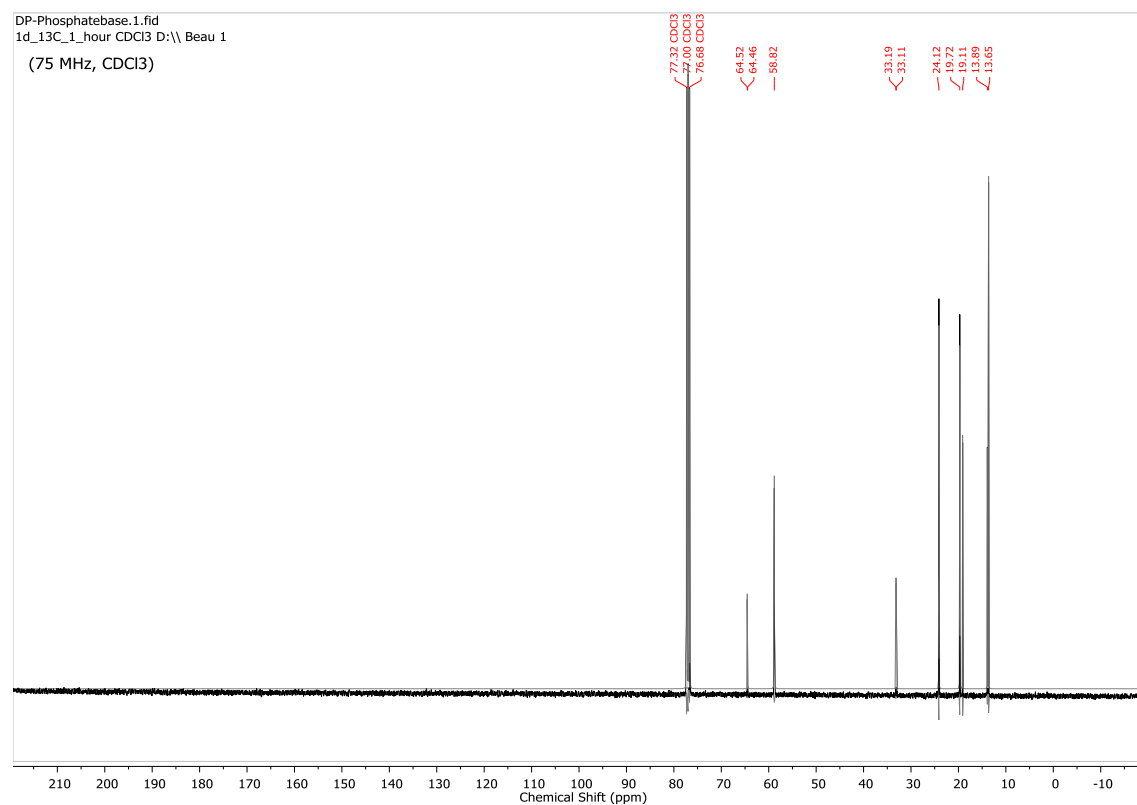



## Supporting Information

DP-Phosphatebase-31P.1.fid  
31P NMR with proton decoupling  
(121 MHz, CDCl<sub>3</sub>)

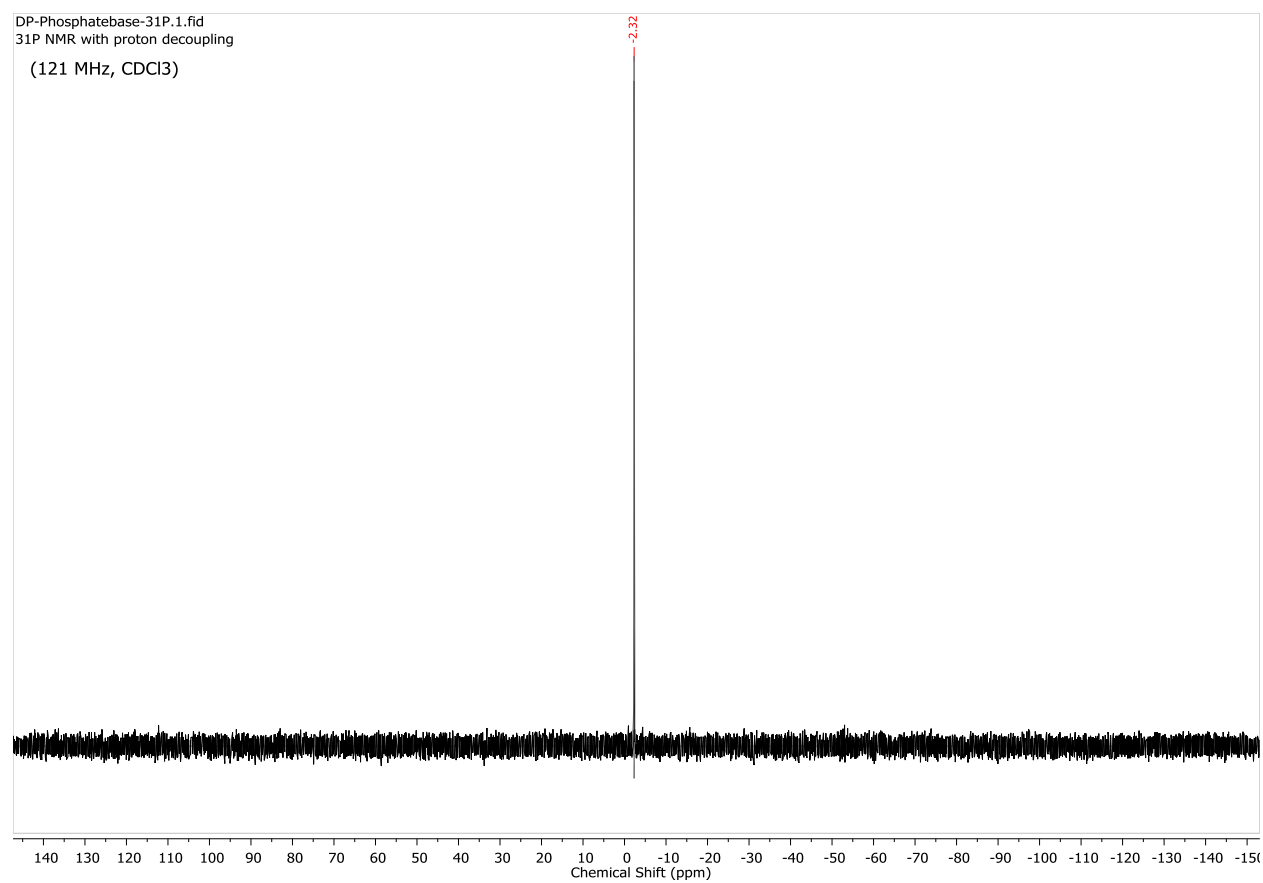

1-H NMR (300 MHz; CDCl<sub>3</sub>):

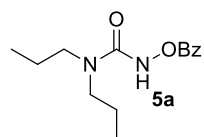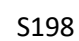

# Supporting Information

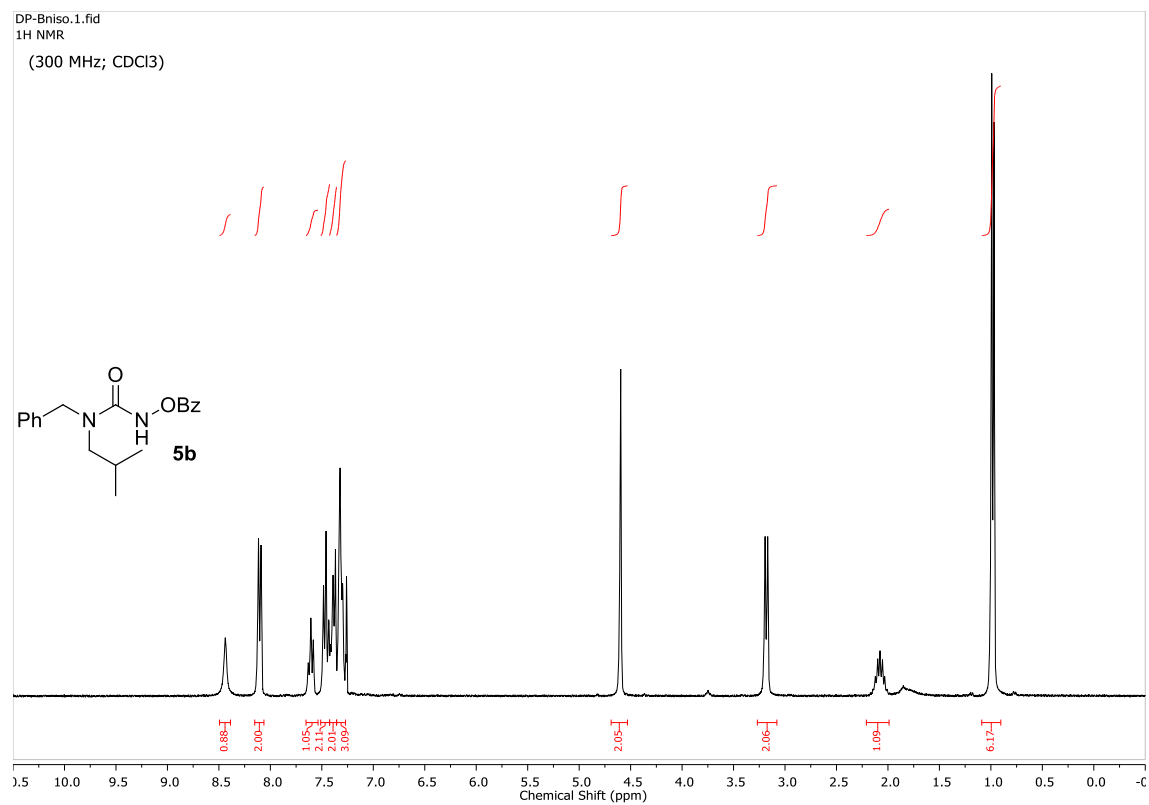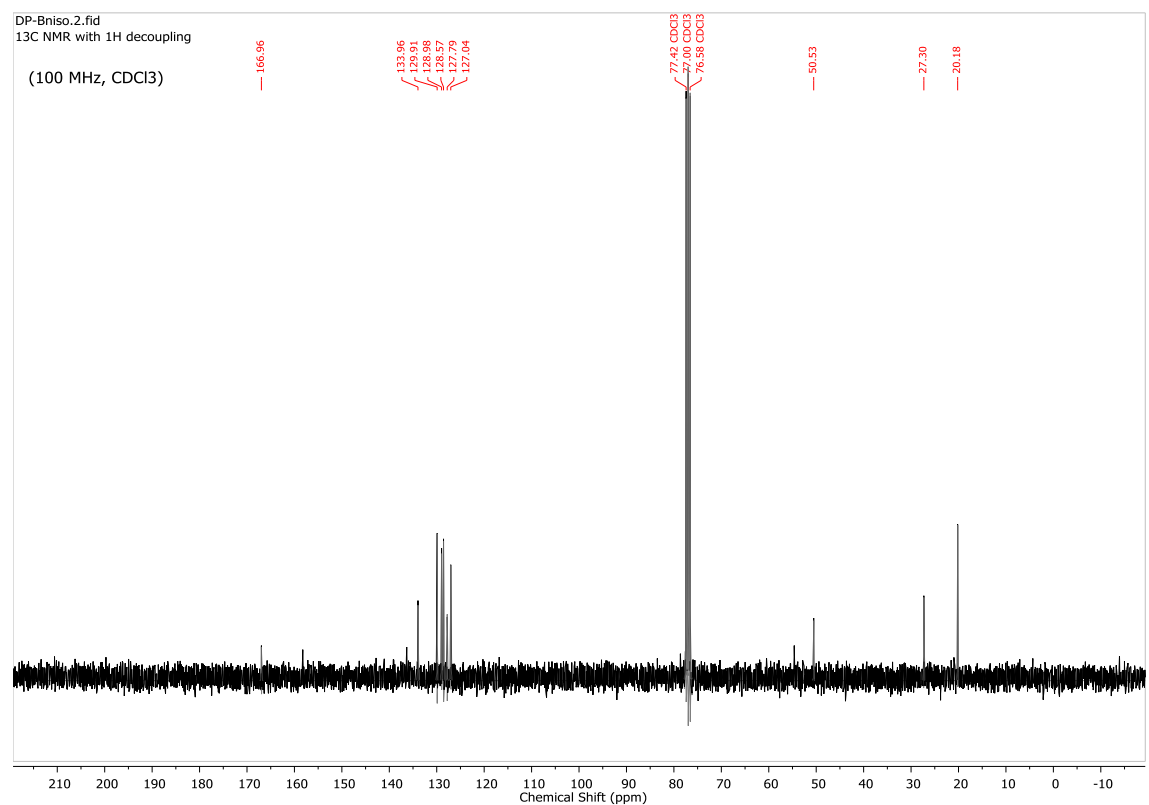

1-H NMR (400 MHz; CDCl<sub>3</sub>):

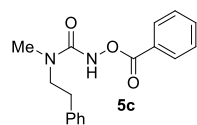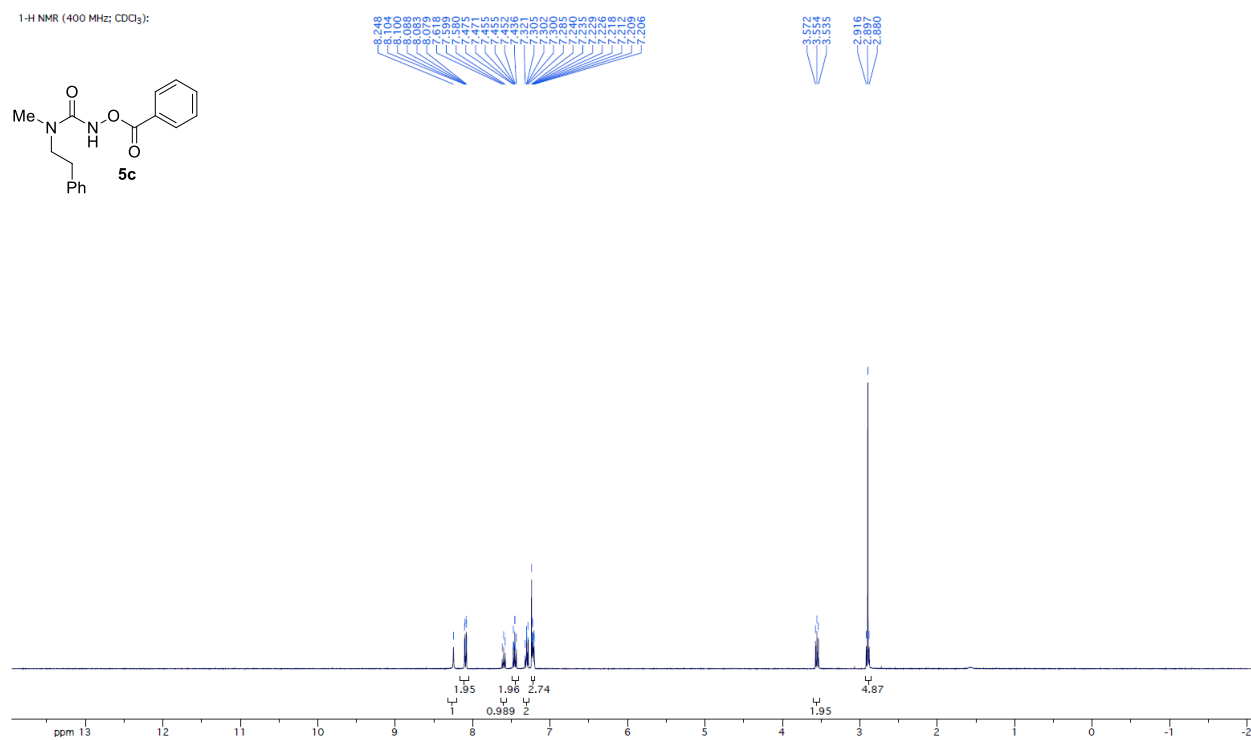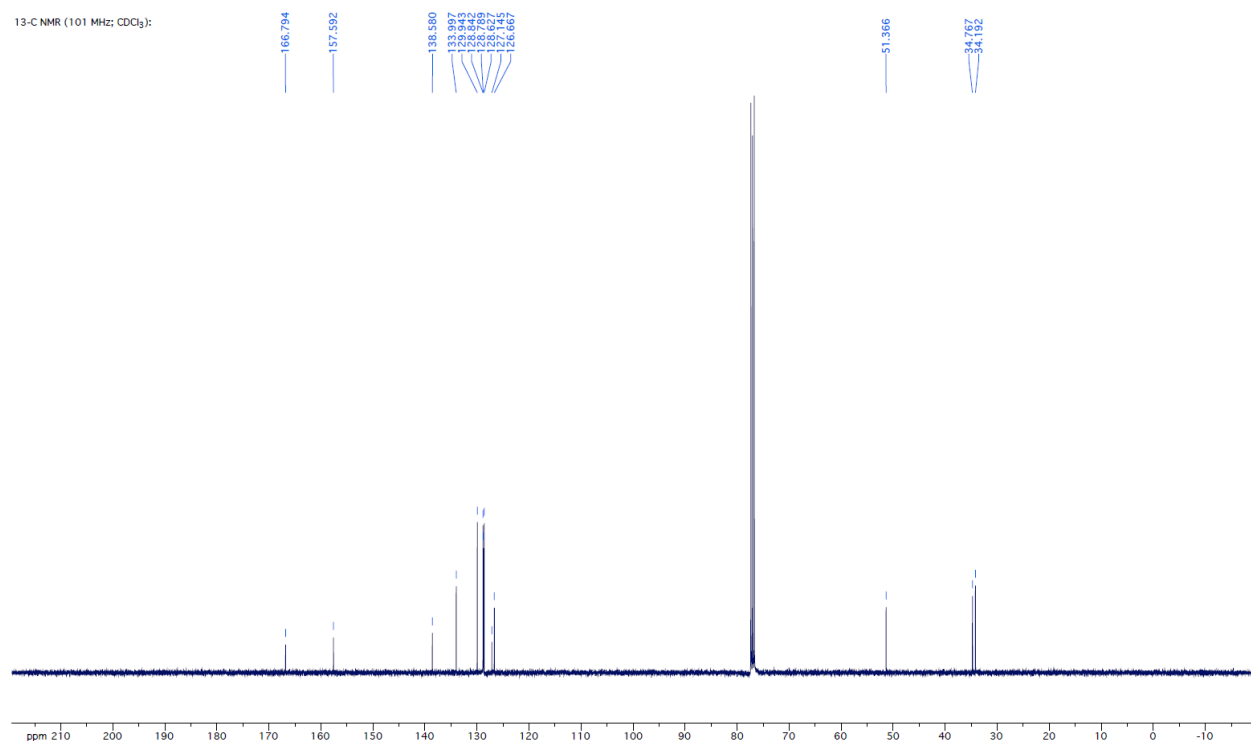

# Supporting Information

<sup>1</sup>H NMR (300 MHz; CDCl<sub>3</sub>):

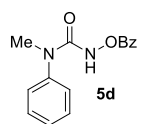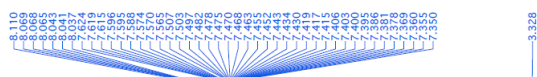

<sup>13</sup>C NMR (75 MHz; CDCl<sub>3</sub>):

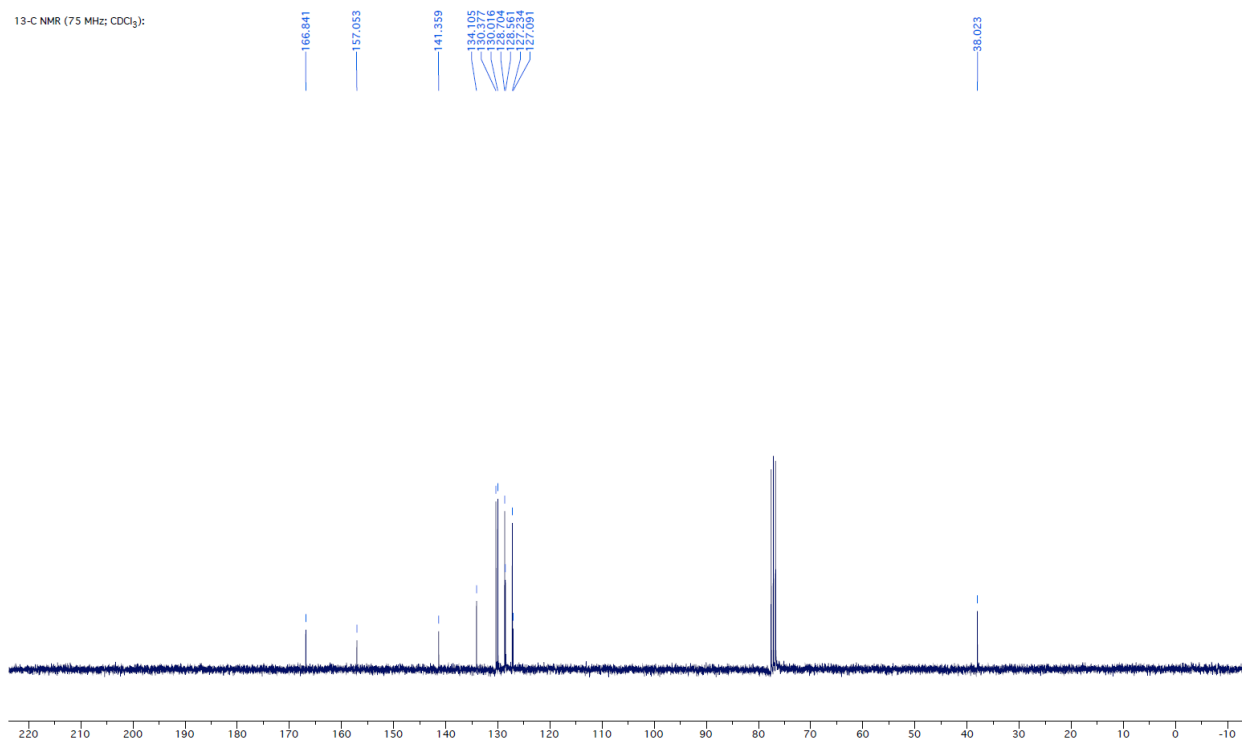

# Supporting Information

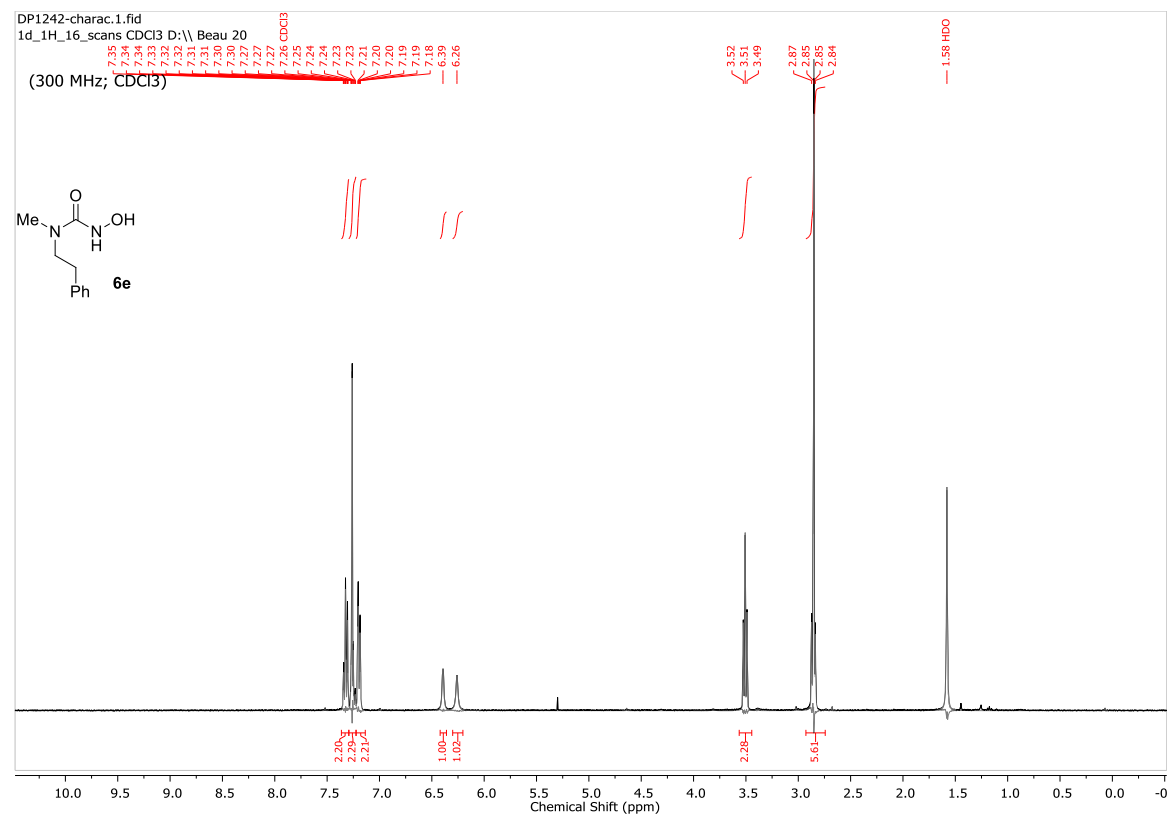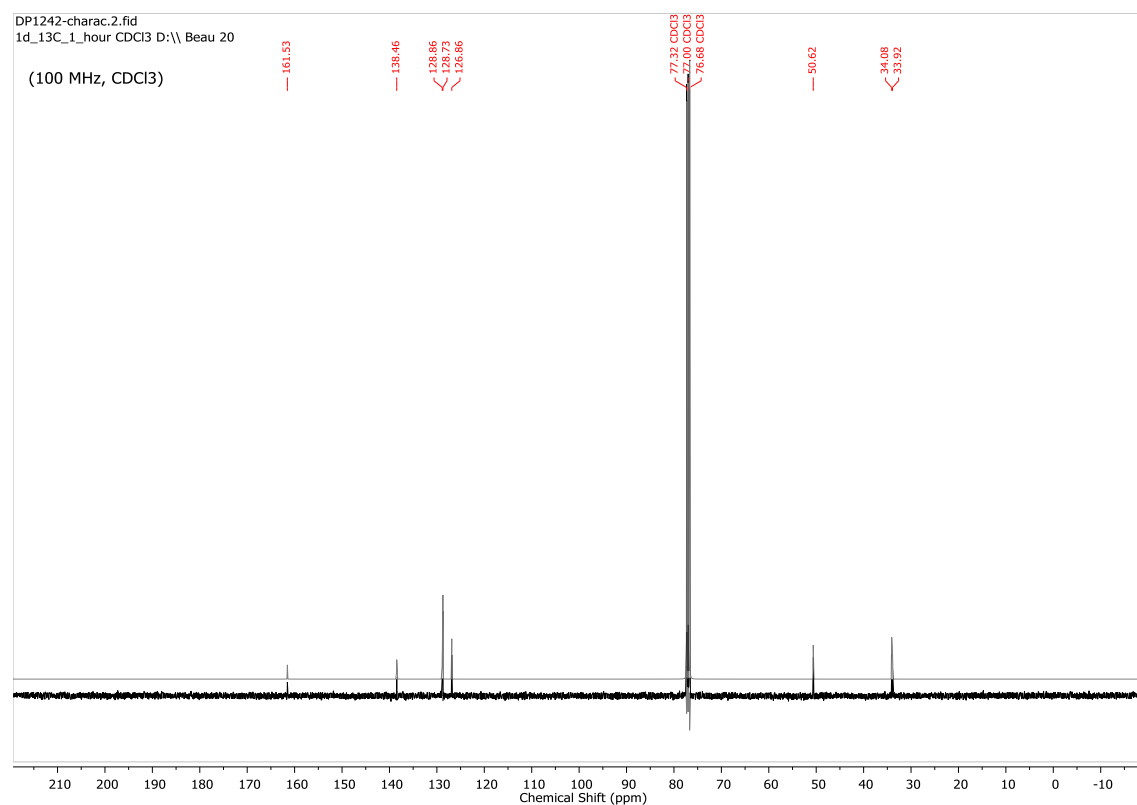

# Supporting Information

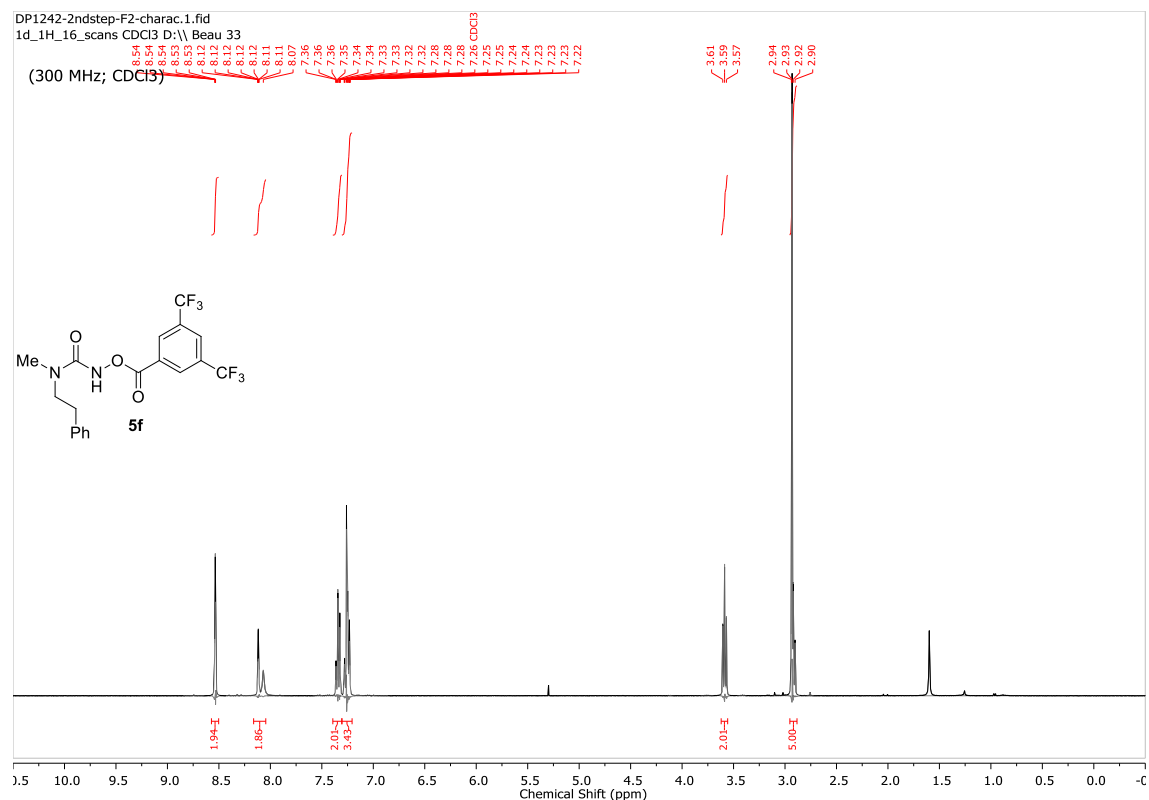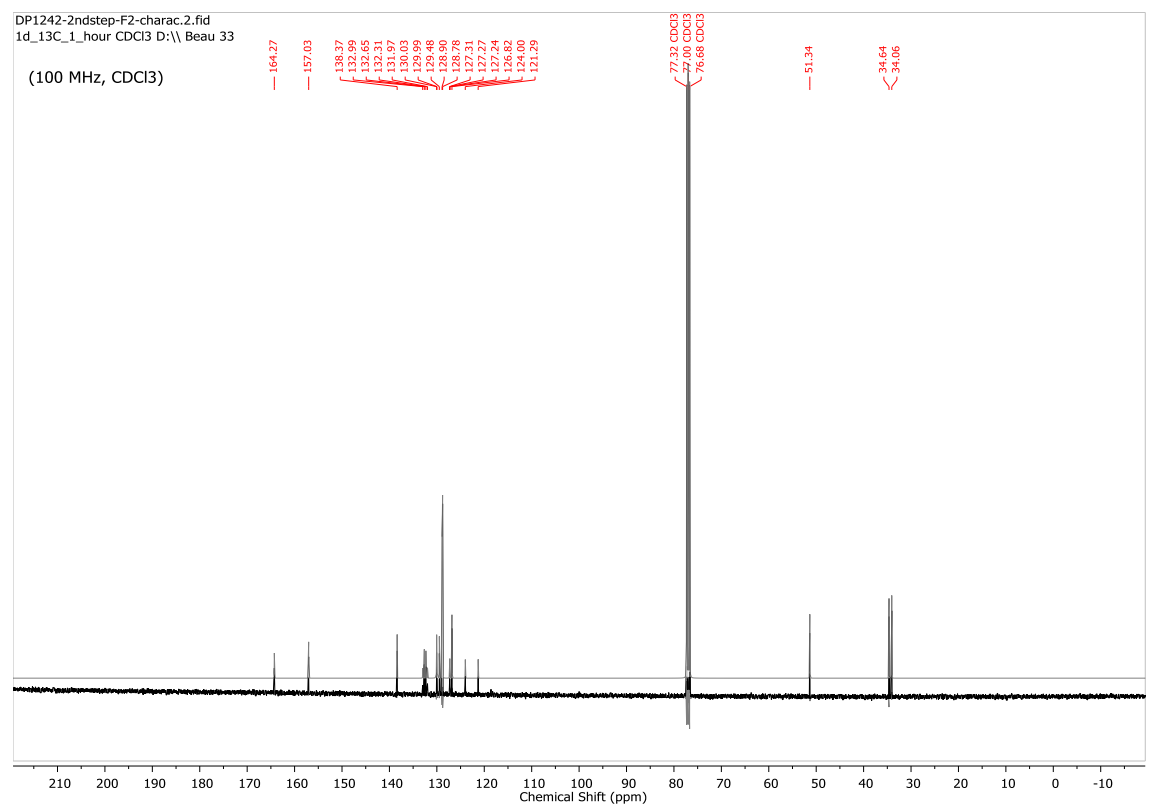

## Supporting Information

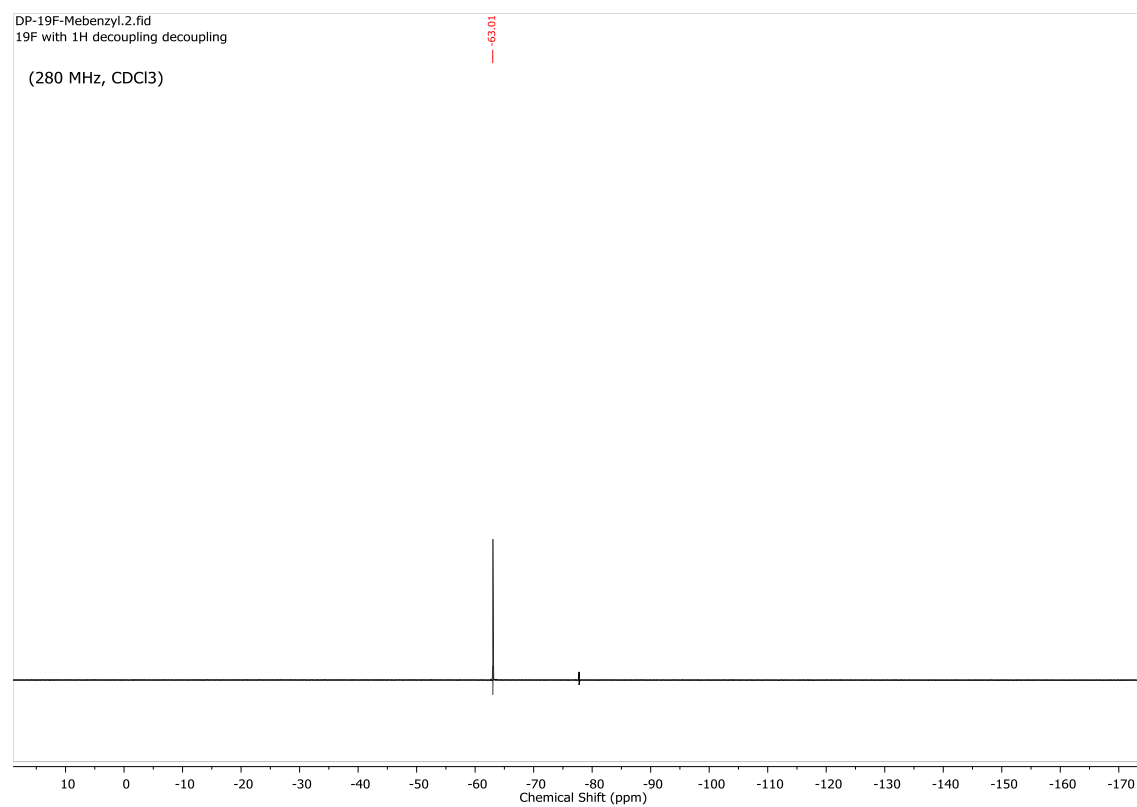

Supplement: Supplementary file 1 [file 24149900]
